# Supplementary material for: Uncharacterized yeast gene YBR238C, an effector of TORC1 signaling in a mitochondrial feedback loop, accelerates cellular aging via HAP4- and RMD9-dependent mechanisms
Source: eLife journal article supplement (doi:10.7554/elife.92178), 2023-11-24
Supplement: fig1-data2 [file Expression profile - rapamycin treated for 60 mins.xlsx]

## Sheet: Full_DESeq2_analysis
targetID	baseMean	log2FoldChange	lfcSE	pvalue	padj
YNL117W	6482.89	8.5452	0.265037	1.57056e-228	9.67937e-225
YAL062W	7601.39	6.91713	0.216691	1.27325e-224	3.92352e-221
YIR029W	5544.84	5.68078	0.200276	4.7981e-178	9.8569e-175
YJR009C	44609.7	-5.45816	0.194816	6.83879e-174	1.05369e-170
YER131W	12596.7	-6.55498	0.234543	5.11985e-173	6.31073e-170
YPL131W	26981.4	-5.61784	0.203359	2.66058e-169	2.73286e-166
YJR152W	86382.7	8.25722	0.301897	7.94143e-166	6.99187e-163
YJL190C	12559.4	-6.10156	0.224959	3.40006e-163	2.61932e-160
YOL039W	10874.5	-5.56406	0.208267	2.37023e-158	1.62308e-155
YGR055W	5714.27	-5.85618	0.227523	2.87153e-147	1.76972e-144
YGL147C	10937.5	-5.99612	0.237476	7.63203e-142	4.27602e-139
YLR044C	127344	-4.40244	0.174886	6.06818e-141	3.11651e-138
YIR028W	4920.64	9.31179	0.370115	1.03111e-139	4.88826e-137
YGR034W	11588.1	-5.43084	0.21845	2.01692e-137	8.49038e-135
YHR010W	11786.3	-5.16315	0.207782	2.06646e-137	8.49038e-135
YNL178W	20355.3	-5.35852	0.220237	6.51455e-132	2.50932e-129
YNL069C	17177.4	-5.10222	0.212267	8.01349e-129	2.90512e-126
YGL031C	12611.4	-5.60034	0.233351	1.86868e-128	6.39814e-126
YOR063W	48788.4	-4.74926	0.197949	2.52012e-128	8.17448e-126
YMR088C	33079	4.96645	0.207327	8.40217e-128	2.58913e-125
YPL249C-A	18039.4	-4.92313	0.206767	1.85306e-126	5.4383e-124
YLR185W	6340.14	-4.71911	0.198642	7.86898e-126	2.20439e-123
YBR189W	21972.6	-5.44222	0.231562	3.50628e-123	9.3953e-121
YOL040C	18585.5	-4.99419	0.212978	9.50053e-123	2.43966e-120
YLR053C	3244.35	8.11234	0.347519	5.79385e-121	1.4283e-118
YOL120C	17407.2	-4.54774	0.196907	4.16883e-119	9.88174e-117
YLR406C	8153.06	-5.48512	0.239594	3.98801e-117	9.10301e-115
YMR116C	23561.1	-5.49193	0.240561	3.7392e-116	8.23025e-114
YLR142W	2116.05	4.87814	0.214084	6.31353e-116	1.34173e-113
YJR145C	19099.7	-5.30224	0.233597	4.47497e-115	9.19308e-113
YKL056C	16293.5	-4.85306	0.214607	3.18737e-114	6.3367e-112
YDR242W	20198.4	6.14247	0.272041	7.88038e-114	1.51771e-111
YDL184C	24275.5	-4.35597	0.194466	3.37597e-112	6.30488e-110
YDL082W	9315.75	-4.8385	0.21627	5.21624e-112	9.4552e-110
YHR021C	6786.75	-4.75305	0.213862	1.44593e-110	2.54607e-108
YLR167W	39321.4	-5.35263	0.242418	3.59294e-109	6.15091e-107
YIR030C	1310.82	5.1155	0.231887	8.13169e-109	1.35448e-106
YNR050C	23254	-4.49699	0.204409	2.75903e-108	4.47471e-106
YKL152C	67062.3	-4.09494	0.186726	1.09247e-107	1.72638e-105
YML073C	8885.53	-3.94593	0.180163	2.06236e-107	3.17759e-105
YMR170C	3245.08	4.39931	0.201655	1.37742e-106	2.0705e-104
YJL177W	9231.63	-5.52783	0.255385	4.5367e-105	6.65707e-103
YDL083C	12929.7	-5.71948	0.26586	3.3748e-104	4.83695e-102
YGL123W	31498.1	-4.42359	0.206568	7.25154e-103	1.01571e-100
YNL302C	12501	-4.55578	0.213393	2.9567e-102	4.04937e-100
YDL081C	12526	-4.44842	0.20861	5.49038e-102	7.35592e-100
YLR388W	4588.14	-4.56224	0.214981	4.54897e-101	5.92706e-99
YBL092W	17891.3	-5.05758	0.238308	4.61624e-101	5.92706e-99
YPR102C	9723.97	-5.11973	0.241649	5.73032e-101	7.20735e-99
YDL130W	11952	-5.05128	0.238335	7.50069e-101	9.24535e-99
YDR025W	11004.9	-4.48162	0.212659	1.04048e-99	1.25735e-97
YLR150W	18122.4	-4.67198	0.222971	9.81828e-99	1.16366e-96
YEL054C	12323.2	-5.30461	0.255221	4.12239e-97	4.79364e-95
YIR031C	15976.6	5.35723	0.257695	6.29129e-97	7.18023e-95
YDR064W	15560.6	-4.71979	0.227677	1.35506e-96	1.51841e-94
YPL107W	5394.57	4.12499	0.199028	1.77706e-96	1.95572e-94
YHL015W	24820.5	-4.79925	0.232432	6.3339e-96	6.84839e-94
YOR293W	12136.5	-4.97934	0.242769	1.24231e-94	1.32007e-92
YKR034W	4699.8	7.32906	0.357217	1.67307e-94	1.74764e-92
YDR012W	9803.76	-4.06767	0.198519	2.18584e-94	2.24522e-92
YJR123W	31527.5	-4.62668	0.226022	3.00744e-94	3.0385e-92
YDL210W	1276.35	5.36612	0.262047	4.01786e-94	3.99389e-92
YFR031C-A	16505.7	-4.70466	0.230542	1.04556e-93	1.02282e-91
YLR029C	25201.2	-4.60571	0.225693	1.09791e-93	1.05725e-91
YJL189W	7579.39	-4.23957	0.207828	1.34399e-93	1.27431e-91
YLR061W	10728.9	-5.03052	0.246707	1.41936e-93	1.32539e-91
YBL087C	7376.74	-5.04325	0.24773	2.7733e-93	2.55102e-91
YIR027C	1043.65	6.25917	0.307172	5.82465e-93	5.27902e-91
YBR191W	7462.07	-5.29112	0.261044	1.64913e-92	1.47299e-90
YOR096W	13521.3	-5.07901	0.250667	1.96767e-92	1.73239e-90
YPL198W	5693.64	-4.39378	0.216827	2.06868e-92	1.79567e-90
YKL006W	12218.4	-5.03062	0.248742	4.19313e-92	3.58921e-90
YHR141C	12655.1	-4.14583	0.206477	9.1036e-91	7.68569e-89
YML026C	14720.7	-4.79473	0.239115	1.4352e-90	1.19529e-88
YIL018W	25401.7	-4.34267	0.216608	1.6146e-90	1.32677e-88
YGL189C	18573.4	-4.33829	0.216961	4.66436e-90	3.78242e-88
YBR031W	18270.6	-4.10925	0.206306	2.30197e-89	1.84247e-87
YOR003W	3242.89	4.21414	0.211684	3.511e-89	2.77414e-87
YLL045C	23906.2	-4.97294	0.250747	1.11091e-88	8.66648e-87
YGL076C	18579.5	-4.31245	0.217907	2.40954e-88	1.85625e-86
YDR471W	8864.3	-4.24347	0.214552	3.58099e-88	2.72465e-86
YLR325C	15301	-4.55122	0.231181	2.08321e-87	1.56571e-85
YDR382W	12891.2	-4.91845	0.249994	2.53172e-87	1.87988e-85
YDR508C	6735.34	-3.53948	0.179704	3.04036e-87	2.23069e-85
YMR143W	13098.2	-4.07992	0.207725	5.68907e-87	4.12491e-85
YHR174W	122849	-3.5479	0.180109	7.46574e-87	5.35015e-85
YFR032C-A	3085.23	-4.36912	0.222468	1.08917e-86	7.71558e-85
YIL069C	9128.23	-4.62334	0.237083	8.30774e-86	5.81825e-84
YLR432W	8682.16	-4.6549	0.239683	3.67018e-85	2.5415e-83
YIL052C	9927.24	-4.83938	0.253267	1.5722e-82	1.07661e-80
YOR369C	23114	-4.65518	0.245224	1.72211e-81	1.1663e-79
YKL180W	12881.9	-4.61092	0.243224	1.85636e-81	1.24356e-79
YLR372W	5702.78	-3.68801	0.194597	3.85346e-81	2.55364e-79
YBL072C	12631.6	-4.43137	0.234726	1.29428e-80	8.48578e-79
YMR230W	7840.99	-4.27343	0.227145	4.5654e-80	2.96174e-78
YLR264W	4652.25	-4.41197	0.236167	5.19738e-79	3.33661e-77
YAL038W	86496.6	-3.16608	0.16979	1.42265e-78	9.03897e-77
YDL133C-A	10702.6	-3.94107	0.211563	1.54417e-78	9.71093e-77
YML063W	18423.5	-4.89708	0.262727	2.47051e-78	1.53795e-76
YDL075W	13859.8	-4.28581	0.230875	4.51519e-78	2.78271e-76
YLR048W	16782	-4.7966	0.260397	4.75678e-77	2.90258e-75
YER074W	10772.2	-4.3928	0.238493	6.39288e-77	3.86268e-75
YNL067W	8991.61	-3.35852	0.182186	7.14006e-77	4.27225e-75
YPR001W	1896.94	5.43801	0.2953	9.5844e-77	5.67968e-75
YOL086C	86882.3	-3.91502	0.213145	2.00848e-76	1.17888e-74
YJR094W-A	7915.96	-4.3839	0.239386	3.83871e-76	2.23188e-74
YJR148W	32069.8	3.27281	0.178563	5.5134e-76	3.17562e-74
YHL033C	9451.81	-4.16301	0.227382	5.70328e-76	3.25456e-74
YGR087C	835.601	4.80583	0.262647	1.01216e-75	5.72286e-74
YPR043W	14231	-4.15569	0.227559	1.6026e-75	8.97894e-74
YPL090C	15054.2	-4.38737	0.24091	3.37885e-75	1.87602e-73
YDR450W	13994.5	-4.23591	0.232928	4.29005e-75	2.36068e-73
YKR057W	8223.29	-4.17141	0.229697	9.26907e-75	5.05533e-73
YDR418W	13640.7	-3.73002	0.205613	1.34485e-74	7.27046e-73
YML024W	11774.7	-3.7745	0.208146	1.50866e-74	8.08513e-73
YER117W	13279	-4.03014	0.222706	2.75184e-74	1.46203e-72
YER056C-A	7475.72	-4.67148	0.259254	1.1925e-73	6.28151e-72
YNR053C	4027.74	-4.87477	0.271072	1.8634e-73	9.73232e-72
YLR413W	4339.4	-5.83492	0.324676	2.08387e-73	1.07923e-71
YOL121C	8060.93	-4.45858	0.248344	4.00612e-73	2.05748e-71
YBR048W	10468.2	-4.12434	0.230407	9.70852e-73	4.94493e-71
YDR090C	8004.46	3.70966	0.208421	7.08604e-72	3.57961e-70
YOR095C	1194.19	-6.92288	0.390196	1.86394e-71	9.33939e-70
YDL061C	6119.68	-4.13799	0.234107	5.20582e-71	2.58737e-69
YIL094C	19215.3	-3.62429	0.205152	6.96706e-71	3.43504e-69
YJL172W	49596	4.70449	0.268995	1.60849e-69	7.86758e-68
YBR069C	3657.97	-4.1778	0.239346	2.52188e-69	1.22381e-67
YIL133C	11676.5	-4.32823	0.247833	2.70879e-69	1.30424e-67
YPL143W	12757.3	-3.90852	0.224317	4.57203e-69	2.1843e-67
YIL148W	12009.4	-3.91298	0.22468	5.14034e-69	2.43692e-67
YMR194W	6141.99	-3.61092	0.209784	2.01404e-67	9.4752e-66
YOL127W	18673.4	-4.18866	0.243944	3.20649e-67	1.49709e-65
YJL213W	6813.14	3.71683	0.216538	4.71414e-67	2.18445e-65
YER102W	8896.01	-4.81227	0.28234	2.29498e-66	1.05552e-64
YBR025C	7269.03	-4.28066	0.251825	5.79178e-66	2.64405e-64
YGR148C	11931.8	-3.93138	0.231259	7.01257e-66	3.17783e-64
YDR119W-A	1210.3	5.29301	0.311314	7.56922e-66	3.40504e-64
YCR031C	16720.2	-4.23832	0.249515	8.25795e-66	3.68795e-64
YCR012W	62731.3	-3.63958	0.214249	8.65803e-66	3.82135e-64
YKR094C	10674.4	-3.87871	0.22864	8.68066e-66	3.82135e-64
YDL191W	4106.36	-3.82684	0.225551	1.26852e-65	5.54458e-64
YBL049W	582.346	5.42413	0.319816	2.29162e-65	9.94594e-64
YGR214W	13398.1	-4.65353	0.275468	3.01633e-65	1.29997e-63
YMR242C	12061.4	-4.3911	0.261391	1.91694e-64	8.20423e-63
YGL103W	22906.6	-4.17376	0.24868	2.59475e-64	1.10286e-62
YGL030W	15883.3	-4.448	0.265137	3.04243e-64	1.28428e-62
YMR290C	2691.52	-5.67015	0.340393	1.77292e-63	7.43299e-62
YHR006W	8866.85	3.23724	0.194191	2.4691e-63	1.02818e-61
YOR312C	13182.4	-3.87477	0.233329	5.33143e-63	2.20521e-61
YDL136W	6335.27	-3.78129	0.228114	8.80134e-63	3.61618e-61
YHR089C	4151.03	-4.69057	0.284615	3.6415e-62	1.48626e-60
YDL229W	23312.1	-4.10489	0.2511	2.68552e-61	1.08887e-59
YPL269W	4925.81	3.46307	0.211725	4.09254e-61	1.64852e-59
YPL054W	460.221	5.61063	0.343081	9.66836e-61	3.86923e-59
YKR093W	8739.71	5.28392	0.326001	3.34746e-60	1.33099e-58
YDR500C	9969.62	-3.78722	0.23389	4.42559e-60	1.74839e-58
YMR145C	4668.1	-3.13829	0.193606	4.67986e-60	1.83707e-58
YOR234C	5506.05	-3.61576	0.224388	1.86171e-59	7.26185e-58
YDR447C	9413.74	-4.22137	0.262239	2.11619e-59	8.20258e-58
YPL079W	10094.4	-3.62401	0.225423	3.33382e-59	1.28414e-57
YCR034W	2831.64	-3.63556	0.226349	4.3327e-59	1.65854e-57
YJL136C	10925.2	-3.93932	0.245384	4.69786e-59	1.78722e-57
YPR132W	15135.8	-3.81257	0.237679	5.02528e-59	1.90005e-57
YLR340W	20265.5	-3.63165	0.226367	5.77847e-59	2.17151e-57
YLR448W	6656.43	-4.1921	0.261503	6.65506e-59	2.48577e-57
YBL039C	2696.91	-5.8669	0.366787	8.55412e-59	3.17585e-57
YLR367W	3235.69	-3.61	0.226298	2.47651e-58	9.13936e-57
YBR203W	1347.98	3.87373	0.243983	8.4241e-58	3.09034e-56
YNL162W	10606.6	-3.86051	0.243196	8.6793e-58	3.16512e-56
YGR027C	14916.1	-3.32677	0.209773	1.17417e-57	4.25672e-56
YBR092C	832.484	-4.39349	0.278858	5.41894e-57	1.95304e-55
YOR100C	5056.92	5.77498	0.366997	6.42161e-57	2.30095e-55
YCL036W	950.76	-7.10115	0.452181	1.41326e-56	5.03462e-55
YOR340C	1343.3	-5.29707	0.33783	1.56859e-56	5.55586e-55
YOR167C	8256.68	-3.29747	0.211463	8.14478e-56	2.86836e-54
YGL135W	14307.6	-3.93505	0.253769	2.6306e-55	9.21158e-54
YNL239W	24319.5	3.39262	0.218995	4.44597e-55	1.54805e-53
YKL081W	14366	-3.25365	0.211913	3.44168e-54	1.19163e-52
YCR057C	2621.68	-4.83278	0.316309	7.76686e-54	2.67414e-52
YOR310C	3674.72	-3.62818	0.237319	8.34533e-54	2.85735e-52
YIR042C	1719.73	3.37476	0.220894	1.19418e-53	4.06616e-52
YOR182C	4075.29	-3.94524	0.258647	1.30202e-53	4.40898e-52
YNL112W	7105.77	-5.95906	0.393121	4.06339e-53	1.36845e-51
YPR194C	17077	3.11053	0.206501	2.0374e-52	6.8242e-51
YBR012C	1099.01	3.82714	0.25383	2.16771e-52	7.22139e-51
YLR089C	18379.5	2.74123	0.181998	3.26618e-52	1.08223e-50
YGL009C	18823.5	-2.84462	0.188961	3.88351e-52	1.2799e-50
YAL003W	16040.6	-2.98508	0.200109	8.80581e-52	2.88671e-50
YLR287C-A	11443.9	-2.98236	0.199278	1.40739e-51	4.58927e-50
YLR205C	763.891	3.87685	0.259777	2.38342e-51	7.73106e-50
YKL216W	9593.21	-3.60014	0.2414	2.41904e-51	7.80552e-50
YBR291C	3254.13	-3.33505	0.223675	2.82094e-51	9.05491e-50
YHR203C	13601.6	-3.78368	0.254795	4.2628e-51	1.36122e-49
YDL069C	1417.62	3.17539	0.213717	7.01345e-51	2.22804e-49
YOR344C	1668.9	-2.87496	0.193527	7.78409e-51	2.46017e-49
YMR107W	1586.2	6.60093	0.447136	2.53391e-50	7.96759e-49
YDR170W-A	1088.97	3.97743	0.269611	2.8823e-50	9.01706e-49
YML056C	6321.88	-4.45462	0.302479	3.2324e-50	1.00613e-48
YBR084C-A	16072	-3.66536	0.249677	5.8951e-50	1.8257e-48
YMR142C	17706.6	-3.68383	0.250687	7.0525e-50	2.17323e-48
YOR348C	1825.52	5.07205	0.346588	1.49995e-49	4.5991e-48
YBR181C	12490.6	-3.86948	0.265332	3.03579e-49	9.26217e-48
YJR025C	6474.52	2.73867	0.187145	3.29453e-49	1.00021e-47
YBL027W	21812.3	-3.63706	0.251627	2.54247e-48	7.681e-47
YDR050C	48670.9	-2.83282	0.197615	1.61702e-47	4.86132e-46
YGR043C	447.95	3.61054	0.252148	1.84253e-47	5.51239e-46
YDR385W	14495.9	-3.15649	0.221322	3.99791e-47	1.19029e-45
YIL146C	1982.86	2.78153	0.195417	7.84599e-47	2.32475e-45
YGL196W	5451.16	3.6895	0.260318	9.08341e-47	2.67852e-45
YGR085C	8167.19	-3.47777	0.24599	2.11684e-46	6.21244e-45
YML042W	739.579	3.18809	0.22533	2.16286e-46	6.31739e-45
YDR233C	6937.95	-2.5285	0.179168	4.94376e-46	1.43719e-44
YBR084W	3236.34	-4.55342	0.324989	1.00738e-45	2.91479e-44
YKL060C	132206	-2.56898	0.183515	1.96221e-45	5.65098e-44
YAR035W	1443.05	4.0454	0.289675	2.51261e-45	7.20243e-44
YLR441C	21646.3	-3.41803	0.245624	6.1965e-45	1.76801e-43
YKR091W	2059.42	4.02826	0.290273	8.11087e-45	2.30356e-43
YKL109W	2309.85	-2.54561	0.18309	8.92597e-45	2.52343e-43
YCL048W-A	602.162	8.16971	0.578759	9.43912e-45	2.65631e-43
YDL238C	3135.49	4.61588	0.333308	1.09495e-44	3.06735e-43
YHR029C	18702.1	2.96828	0.214166	1.90052e-44	5.29996e-43
YLR009W	2594.1	-4.12448	0.299687	3.54595e-44	9.84402e-43
YIR032C	3386.39	4.24191	0.309314	7.43127e-44	2.05376e-42
YGL078C	2925.77	-4.91488	0.359154	8.74063e-44	2.40485e-42
YIL117C	2434.56	3.45995	0.252723	1.14207e-43	3.12826e-42
YBR285W	394.636	4.83828	0.353884	1.81878e-43	4.9598e-42
YMR271C	1479.4	3.40791	0.250132	2.97854e-43	8.08668e-42
YOR342C	1628.59	-3.29068	0.243694	1.50063e-42	4.0563e-41
YHR183W	17972.5	-2.6511	0.196412	2.11287e-42	5.6863e-41
YLR333C	5606.78	-3.56133	0.264422	2.2604e-42	6.05689e-41
YNL061W	2730.19	-3.81135	0.283506	2.88226e-42	7.68978e-41
YPL250W-A	251.062	-4.52435	0.338542	1.13255e-41	3.00857e-40
YAL037C-B	402.649	-3.23601	0.242362	1.29084e-41	3.41437e-40
YBR296C	1643.91	-4.70776	0.35389	1.66058e-41	4.37356e-40
YHR052W	2032.66	-3.56863	0.268407	2.28158e-41	5.98358e-40
YML093W	2688.02	-4.18409	0.315218	2.62692e-41	6.86005e-40
YNL096C	6711.19	-3.0894	0.233383	5.80319e-41	1.50907e-39
YNL248C	2182.59	-4.64163	0.351597	6.21176e-41	1.60853e-39
YDL014W	7064.03	-3.72371	0.281983	7.5361e-41	1.94331e-39
YLR075W	33624.2	-3.0496	0.230927	9.62005e-41	2.47035e-39
YNR054C	685.841	-3.54546	0.269246	1.26948e-40	3.2464e-39
YOR328W	2764.76	2.8726	0.217957	1.47397e-40	3.75375e-39
YNL062C	1013.87	-4.42704	0.337389	1.9132e-40	4.85228e-39
YPL081W	5412.2	-4.59103	0.350301	2.21143e-40	5.58568e-39
YNL284C-B	3301.92	2.94264	0.223991	2.44324e-40	6.14599e-39
YPL093W	5066.78	-4.42607	0.338603	3.34118e-40	8.3706e-39
YGR118W	15107.8	-2.77979	0.212157	3.98882e-40	9.95268e-39
snR44	312.448	-3.50806	0.268439	5.40071e-40	1.34212e-38
YLR073C	719.375	-4.68506	0.360846	1.14302e-39	2.82908e-38
YIL169C	752.788	-3.25174	0.250119	1.26363e-39	3.1151e-38
YJL148W	2262.89	-4.02007	0.310898	2.3599e-39	5.79444e-38
YGR159C	12005.8	-4.06042	0.314359	2.9399e-39	7.18992e-38
YPL220W	8833.09	-3.25862	0.253478	6.20444e-39	1.51138e-37
YPL037C	6673.85	-2.31869	0.179536	6.2961e-39	1.52767e-37
YJR070C	3276.86	-3.71403	0.289184	8.22155e-39	1.98703e-37
YPL272C	1136.02	3.1092	0.242027	1.07627e-38	2.59104e-37
YLR401C	1507.69	-4.73324	0.371483	2.48501e-38	5.9592e-37
YLL008W	2553.17	-4.33616	0.340629	3.06734e-38	7.32713e-37
YAL025C	2743.43	-4.47989	0.352341	3.59235e-38	8.54813e-37
YLL024C	27541.8	-2.40103	0.188371	5.0967e-38	1.20811e-36
YER126C	2116.06	-3.22704	0.253972	5.60056e-38	1.32246e-36
YNL301C	3313.69	-2.73864	0.215511	6.88573e-38	1.61972e-36
YFR055W	10163.2	2.49534	0.196165	7.11751e-38	1.66788e-36
YGR154C	2659.12	3.61146	0.284646	7.26715e-38	1.69649e-36
YJR008W	1063.42	2.71769	0.214138	9.17363e-38	2.13348e-36
YGL055W	5940.56	-2.49477	0.196855	1.2374e-37	2.86694e-36
YDR101C	2284.1	-4.02522	0.319082	1.42751e-37	3.29503e-36
YLR312C	830.756	5.43155	0.430233	1.49701e-37	3.44256e-36
YHL001W	5715.01	-2.80402	0.222199	2.03417e-37	4.66044e-36
YDL239C	2760.37	3.98037	0.316212	2.33468e-37	5.32913e-36
YHR066W	1517.33	-3.50987	0.279521	3.3941e-37	7.71876e-36
YLR186W	1418.37	-3.50876	0.279677	3.89635e-37	8.82838e-36
YLR409C	2093.87	-4.27986	0.342425	5.84987e-37	1.32061e-35
YKL103C	10910.6	4.22241	0.337789	6.28035e-37	1.41262e-35
YOR298W	990.339	3.91644	0.313096	6.49341e-37	1.45523e-35
YIL037C	266.82	3.84226	0.307182	7.94959e-37	1.77512e-35
YBR247C	1371.21	-4.23334	0.339352	7.98893e-37	1.77747e-35
YDR144C	1262.28	-2.38578	0.191388	1.82575e-36	4.04752e-35
YGR162W	5700.14	-3.06892	0.247204	2.38096e-36	5.25945e-35
YNL175C	1927.48	-3.79294	0.306706	3.41193e-36	7.50989e-35
YBL029W	606.712	-3.12624	0.252537	3.72119e-36	8.16146e-35
YDR033W	10038	-3.3249	0.269226	4.98871e-36	1.09026e-34
YKL009W	3001.23	-3.92725	0.319017	6.68813e-36	1.4565e-34
YEL026W	3794.68	-3.32899	0.270227	7.88358e-36	1.71079e-34
YPL134C	1524.11	2.47571	0.200624	8.78665e-36	1.90007e-34
YDL057W	868.114	2.71828	0.220485	8.92135e-36	1.92246e-34
YGR192C	215224	-2.48833	0.20299	2.21919e-35	4.76547e-34
YMR049C	2283.17	-4.10117	0.336345	2.79587e-35	5.98296e-34
YGR283C	575.266	-3.60435	0.295672	3.27161e-35	6.97679e-34
YMR260C	4772.5	-2.85816	0.234942	5.05701e-35	1.0747e-33
YLR164W	1228.04	3.52984	0.290543	6.03616e-35	1.27838e-33
YNL168C	2865.65	2.19119	0.180013	8.6452e-35	1.82467e-33
YHR049W	1899.44	-2.36155	0.194549	1.06284e-34	2.2356e-33
YHL016C	6499.72	4.06343	0.338118	2.36806e-34	4.96407e-33
YFR044C	9054.81	2.09042	0.172996	2.69303e-34	5.62615e-33
YLR160C	338.961	5.7413	0.477273	3.28332e-34	6.83618e-33
YJR147W	740.413	-3.00619	0.250474	3.88298e-34	8.0575e-33
YKL143W	1492.64	-4.34114	0.362892	4.27933e-34	8.85017e-33
YOL093W	801.014	-3.1753	0.265388	5.76954e-34	1.18922e-32
YPL213W	1255.83	2.49653	0.208258	6.39205e-34	1.31314e-32
YER064C	899.76	-3.0548	0.255875	8.25505e-34	1.69023e-32
YCR099C	663.901	2.53971	0.212279	8.56559e-34	1.748e-32
YBL024W	2148.27	-2.68926	0.225192	9.11288e-34	1.85355e-32
YNL142W	67802.7	4.3299	0.362483	9.95327e-34	2.01783e-32
YDR540C	727.103	3.65679	0.307313	1.27922e-33	2.58486e-32
YNL002C	2734.15	-3.3523	0.282058	1.44852e-33	2.9174e-32
YKL153W	301.783	-3.48886	0.293648	1.54508e-33	3.10174e-32
YCR087C-A	534.265	-4.10059	0.346078	1.80988e-33	3.62152e-32
YNL151C	1104.52	-3.57948	0.302207	2.09697e-33	4.1824e-32
YJL191W	2722.64	-3.02997	0.255521	2.15361e-33	4.28151e-32
YIR007W	988.334	2.48861	0.209367	2.21561e-33	4.39061e-32
YPL263C	1570.26	-3.29099	0.277991	2.46664e-33	4.87241e-32
YEL042W	2755.98	-2.41567	0.203022	2.48344e-33	4.88992e-32
YOL077C	2109	-3.84768	0.325666	2.75731e-33	5.41187e-32
YIL103W	600.875	-3.92483	0.332669	3.40586e-33	6.66358e-32
YIR039C	679.683	3.39722	0.287859	4.23639e-33	8.2623e-32
YPL061W	9975.74	-5.21136	0.444342	5.80227e-33	1.12806e-31
YGR123C	1104.03	-3.63621	0.309693	7.03455e-33	1.36333e-31
YPL017C	326.055	3.54948	0.301716	7.17128e-33	1.38547e-31
YDR060W	3804.56	-3.60976	0.307782	8.29331e-33	1.59724e-31
YDR091C	2780.66	-3.00368	0.255754	8.38481e-33	1.60983e-31
YGR103W	4539.08	-4.36105	0.373234	1.14836e-32	2.19793e-31
YMR309C	4342.47	-2.50552	0.213676	1.38431e-32	2.64133e-31
YPR010C	6473.31	-4.02138	0.344521	1.41017e-32	2.68237e-31
YGR090W	2392.83	-3.11112	0.266021	1.45155e-32	2.75259e-31
YPR061C	844.84	2.35106	0.201326	2.85259e-32	5.39279e-31
YGR211W	2349.14	-3.13849	0.269903	3.14621e-32	5.92969e-31
YDR324C	2212.64	-3.65286	0.314869	3.58172e-32	6.72992e-31
YDR184C	587.302	-4.44948	0.384336	4.14719e-32	7.76874e-31
YBL081W	1217.24	-2.64163	0.228509	8.85207e-32	1.65319e-30
YDR299W	1593.49	-3.49008	0.302857	9.35623e-32	1.74207e-30
YLR197W	7110.68	-3.55326	0.308726	1.0695e-31	1.98533e-30
YML043C	768.635	-3.15708	0.273999	1.09049e-31	2.01823e-30
YMR226C	11202	2.21741	0.192072	1.45928e-31	2.69268e-30
YDR047W	1515.83	-2.44605	0.212553	1.4764e-31	2.71613e-30
YDR496C	2498.46	-3.74062	0.325906	1.51603e-31	2.78075e-30
YDR222W	314.655	-2.89145	0.252118	2.44188e-31	4.46566e-30
YER060W	388.137	3.11954	0.272663	3.20837e-31	5.85006e-30
HRA1	245.797	4.48728	0.39234	3.67598e-31	6.68292e-30
YLR074C	2349.18	-3.48793	0.305986	3.95604e-31	7.1709e-30
YLR196W	2962.3	-3.56113	0.312818	4.55515e-31	8.23267e-30
YJL089W	542.817	3.81409	0.335196	5.56958e-31	1.00366e-29
YDR083W	1242.95	-3.8176	0.336156	5.85723e-31	1.05242e-29
YIL089W	357.134	2.96548	0.260492	6.70911e-31	1.20198e-29
YDL148C	2137.46	-4.29693	0.379135	6.91503e-31	1.23529e-29
YNL110C	1911.21	-3.11352	0.274498	8.63436e-31	1.53796e-29
YKR097W	371.385	3.19607	0.28146	8.73163e-31	1.55081e-29
YOL159C	1030.3	2.3419	0.205945	1.03169e-30	1.8271e-29
YGL121C	320.248	3.27349	0.288747	1.06744e-30	1.885e-29
YGL120C	2649.67	-3.93301	0.348289	1.17454e-30	2.06819e-29
YAL023C	5612.42	-2.08397	0.183782	1.62175e-30	2.84754e-29
YJR149W	973.443	2.28832	0.201904	1.63969e-30	2.86538e-29
YMR195W	6034.8	3.30204	0.29247	1.64121e-30	2.86538e-29
YLR175W	7539.8	-3.22989	0.286414	1.71742e-30	2.98997e-29
YNL182C	1188.77	-3.61547	0.321963	2.62418e-30	4.55572e-29
YBR088C	1242.92	-2.66596	0.236701	2.67557e-30	4.63189e-29
YOR226C	1828.13	-2.25662	0.199992	2.76746e-30	4.77755e-29
YPR041W	4159.69	-2.67191	0.237445	2.81508e-30	4.84618e-29
YIL158W	882.505	-2.38832	0.212144	3.34727e-30	5.74631e-29
YDL085W	831.686	4.74418	0.423528	3.41492e-30	5.84615e-29
YDL208W	3680.16	-3.06147	0.272893	3.6749e-30	6.2738e-29
YNL244C	5299.78	-2.44618	0.217566	3.76501e-30	6.40988e-29
YGL205W	385.289	3.4525	0.307815	4.00519e-30	6.8e-29
YDR429C	4439.76	-2.32294	0.207015	5.24874e-30	8.88681e-29
YJL011C	313.879	-3.02546	0.270851	6.75075e-30	1.13986e-28
YPL229W	1102.86	2.27953	0.203616	8.40499e-30	1.4153e-28
YCR100C	798.005	2.63623	0.236064	8.46022e-30	1.42072e-28
YNL209W	18890.5	-2.90981	0.26141	1.07292e-29	1.79685e-28
YER006W	2644.19	-3.66803	0.33063	1.17841e-29	1.96818e-28
YLR155C	198.564	6.35168	0.562816	1.41096e-29	2.35021e-28
YAL059W	1011.23	-3.76262	0.339781	1.44103e-29	2.39381e-28
YOR206W	2628.21	-3.19661	0.28852	1.62811e-29	2.69033e-28
YNR068C	4376.01	3.70916	0.334946	1.62825e-29	2.69033e-28
YCR013C	199.435	-3.61715	0.326363	1.65686e-29	2.73027e-28
YBR267W	1502.58	-3.28352	0.296748	1.85511e-29	3.04881e-28
YDR087C	1096.43	-3.51359	0.317882	1.95244e-29	3.20023e-28
YPL088W	1095.75	2.17941	0.196228	2.23903e-29	3.66025e-28
YDR453C	1157.88	3.86366	0.350359	2.63095e-29	4.28956e-28
YEL034W	14197.6	-2.29079	0.206931	2.92046e-29	4.74903e-28
YLL058W	747.32	2.4657	0.222834	3.00263e-29	4.86979e-28
YBR172C	2185.53	-2.50754	0.227886	5.34233e-29	8.64168e-28
YFL034C-A	3378.81	-2.39896	0.218209	6.36418e-29	1.02677e-27
YKL089W	2048.21	2.46931	0.224617	6.47252e-29	1.04152e-27
YKR059W	6438.09	-2.42945	0.221215	7.07918e-29	1.13617e-27
YLR307C-A	180.985	6.04783	0.546289	1.17991e-28	1.88877e-27
YIL064W	519.307	-3.96918	0.364802	1.19704e-28	1.91123e-27
YKL188C	1337.83	2.98708	0.273868	1.25501e-28	1.99862e-27
YCL027W	196.378	3.4133	0.3129	1.35477e-28	2.15192e-27
YDR085C	573.191	2.60442	0.238666	1.45417e-28	2.30387e-27
YMR156C	678.574	2.61634	0.239996	1.64354e-28	2.59722e-27
YCR072C	1032.81	-3.4846	0.321188	1.88151e-28	2.96566e-27
YHR209W	527.785	2.65889	0.244253	1.99377e-28	3.13459e-27
YKR081C	1845.16	-3.69763	0.341362	2.11066e-28	3.30992e-27
YLR222C	1736.47	-3.71439	0.342934	2.12298e-28	3.3208e-27
YJL217W	2988.33	2.42014	0.222304	2.17777e-28	3.39788e-27
YNL040W	2735.47	2.23091	0.205517	3.51436e-28	5.46945e-27
YNL054W-B	5582.15	2.68237	0.248106	4.09552e-28	6.35785e-27
YGL062W	36221.4	3.88329	0.35862	4.56854e-28	7.07435e-27
YDL048C	1204.06	-2.20369	0.203614	4.79881e-28	7.40495e-27
YLR344W	8529.42	-2.85126	0.264366	4.80607e-28	7.40495e-27
YNL292W	737.828	-2.55944	0.237039	5.01649e-28	7.70988e-27
YLR129W	2438.52	-3.61691	0.33665	5.6478e-28	8.65856e-27
YDR046C	4061.77	-2.50466	0.232198	5.78455e-28	8.8462e-27
YML113W	642.189	-2.96823	0.275747	6.10526e-28	9.31354e-27
YHR193C	8845.56	-1.96186	0.18239	1.19472e-27	1.81804e-26
YOR361C	4579.88	-2.2639	0.210989	1.21961e-27	1.85135e-26
YJR011C	968.005	2.42593	0.226183	1.26034e-27	1.90847e-26
YOR341W	4809.43	-3.88207	0.364206	1.58595e-27	2.39564e-26
YJL206C	974.894	2.18179	0.203557	1.61386e-27	2.43184e-26
YJL200C	12523.8	-2.65134	0.249855	2.79334e-27	4.19886e-26
YDL153C	2124.9	-4.33981	0.410243	2.94891e-27	4.42193e-26
YOR108W	4001.29	-2.27413	0.214197	4.24578e-27	6.35115e-26
YEL066W	1973.99	2.37043	0.223529	4.80956e-27	7.17708e-26
snR49	185.794	-3.50439	0.332081	5.51468e-27	8.20941e-26
YDL066W	57292.5	2.78541	0.264022	7.63701e-27	1.13414e-25
YGL029W	1092.47	-3.6864	0.351107	7.65605e-27	1.13424e-25
YNL132W	1981.13	-3.96342	0.377911	7.86798e-27	1.16284e-25
YLR449W	1896.24	-3.19389	0.304876	1.14111e-26	1.68245e-25
YCL054W	2986.01	-3.1195	0.298633	1.62135e-26	2.38481e-25
YHR030C	3602.52	1.91488	0.182521	2.23059e-26	3.27313e-25
YHR216W	6056.42	-2.75238	0.264018	2.38911e-26	3.4974e-25
YGR161C	5595.32	4.11265	0.396733	3.40448e-26	4.972e-25
YPL211W	1280.29	-3.98202	0.384841	3.47117e-26	5.0574e-25
YDL067C	10024.9	2.38868	0.229507	3.5033e-26	5.09218e-25
YOL110W	969.901	2.05097	0.196562	3.62839e-26	5.26159e-25
YMR128W	1811.45	-3.83019	0.370406	3.82757e-26	5.5374e-25
YDR449C	1019.51	-3.42307	0.33109	4.55645e-26	6.57644e-25
YDL169C	1148.95	4.15501	0.403151	4.97234e-26	7.15994e-25
YDR234W	8455.22	-2.22317	0.214322	5.6644e-26	8.13745e-25
YJL122W	1530.39	-3.4062	0.330212	5.71245e-26	8.18741e-25
YIR017C	2656.67	2.42515	0.233967	5.80761e-26	8.30448e-25
YPL033C	1075.21	4.79444	0.465904	6.15033e-26	8.77419e-25
YMR174C	560.266	2.69508	0.260495	6.25729e-26	8.90616e-25
YOL041C	2479.39	-2.92557	0.284035	8.13471e-26	1.15517e-24
YJR072C	1432.23	-2.91545	0.283795	1.0832e-25	1.53278e-24
YEL072W	2026.54	1.92433	0.186071	1.08436e-25	1.53278e-24
YDR514C	637.635	-2.41853	0.234827	1.10671e-25	1.56079e-24
YLR183C	761.209	-2.88515	0.280856	1.11198e-25	1.56465e-24
YKL078W	682.754	-4.33623	0.424105	1.16505e-25	1.63558e-24
YGL225W	4639.08	-1.95106	0.189372	1.52397e-25	2.13459e-24
YPL032C	2083.19	-2.01598	0.195882	1.59e-25	2.22203e-24
YBL028C	1339.38	-3.05626	0.299053	1.76388e-25	2.45946e-24
YBR187W	3219.77	-2.1584	0.210261	1.8565e-25	2.58275e-24
YCL034W	3592.14	2.0917	0.203726	2.01729e-25	2.80012e-24
YDL170W	9912.11	2.93533	0.287374	2.14989e-25	2.97748e-24
YDR465C	1744.54	-3.68335	0.362721	2.74021e-25	3.78653e-24
YER065C	1207.69	2.50615	0.246009	3.51073e-25	4.8404e-24
YHR096C	242.489	3.04069	0.298916	3.64171e-25	5.00979e-24
YLR004C	360.064	3.52834	0.348037	3.77172e-25	5.17708e-24
YMR155W	1882.11	1.97573	0.193645	3.97497e-25	5.44394e-24
YDR072C	1721.46	-2.05605	0.202028	5.01612e-25	6.85462e-24
YEL058W	5214.66	1.77119	0.173875	6.17293e-25	8.41677e-24
YGR271C-A	831.146	-2.58011	0.255281	7.14794e-25	9.72467e-24
YBR068C	8156.39	-2.1371	0.210999	7.56988e-25	1.0276e-23
YER070W	5787.55	-3.13144	0.310934	7.78445e-25	1.05441e-23
YBL054W	1167.54	-3.70473	0.368826	8.42787e-25	1.13906e-23
YDR076W	1095.95	2.39831	0.237508	9.28323e-25	1.25192e-23
YOR168W	4191.13	-2.36952	0.235297	1.15894e-24	1.5595e-23
YKL161C	1192.84	2.08488	0.206572	1.22766e-24	1.64838e-23
YIL127C	854.524	-3.78566	0.378823	1.37701e-24	1.84489e-23
YMR020W	1322.48	2.15962	0.214484	1.47406e-24	1.97064e-23
YDL150W	1494.33	-2.74199	0.273527	1.49645e-24	1.99623e-23
YBR143C	6620.01	-1.9397	0.192937	1.95099e-24	2.59696e-23
YKL082C	2797.68	-2.60641	0.260773	2.17805e-24	2.89295e-23
YOR272W	1585.87	-3.70223	0.372649	2.52779e-24	3.35028e-23
YOR101W	1863.72	-3.00742	0.301982	2.55435e-24	3.37821e-23
YGR230W	500.558	2.31924	0.231803	2.58034e-24	3.40528e-23
YJR124C	945.075	-2.39498	0.23994	2.85028e-24	3.75348e-23
YPL245W	564.514	-2.43205	0.243783	2.96034e-24	3.88794e-23
YHR128W	2412.03	-2.53417	0.254221	2.96501e-24	3.88794e-23
YMR046W-A	241.282	3.21788	0.323616	3.03797e-24	3.97516e-23
YDL037C	472.803	-4.17493	0.42144	3.0863e-24	4.02984e-23
YEL059C-A	304.938	2.69876	0.271027	3.36767e-24	4.38794e-23
YPL226W	7573.44	-2.8006	0.282286	3.91579e-24	5.09136e-23
YLR149C	576.549	3.1685	0.319855	4.58391e-24	5.94751e-23
YBR079C	6097.26	-2.17355	0.218474	4.62392e-24	5.98681e-23
YPR099C	165.933	3.57317	0.361102	5.71369e-24	7.38228e-23
YDR421W	1430.64	2.05252	0.206467	5.79389e-24	7.47024e-23
YMR131C	3941.71	-3.11482	0.315999	6.64856e-24	8.5543e-23
YJR143C	4218.41	-1.74014	0.174927	6.77028e-24	8.69276e-23
YBR154C	2185.75	-2.29624	0.232048	7.24506e-24	9.28302e-23
YGL171W	1242.81	-3.4051	0.346248	7.53752e-24	9.6377e-23
YKR039W	60552.2	3.20379	0.325268	7.70196e-24	9.82757e-23
YCR020C	453.234	2.52484	0.255643	7.87916e-24	1.00329e-22
YDL054C	6002.3	2.64999	0.268345	8.92526e-24	1.13415e-22
YLR351C	5557.55	1.86969	0.188641	9.21362e-24	1.16839e-22
YGL156W	1132.56	3.42021	0.348265	9.6773e-24	1.22467e-22
YBR235W	4500.72	1.92875	0.19485	9.92114e-24	1.25295e-22
YGR145W	1723.83	-3.77481	0.386006	1.16671e-23	1.47044e-22
YGL008C	87391.2	-1.83076	0.185406	1.1897e-23	1.49635e-22
YDR461W	200.546	3.48339	0.35566	1.30988e-23	1.64416e-22
YGL202W	41408.9	1.96323	0.198916	1.35016e-23	1.69127e-22
YCR073C	1970.99	2.47218	0.251673	1.38784e-23	1.73494e-22
YDL171C	20963.8	1.87668	0.190224	1.50397e-23	1.87631e-22
YDL149W	1015.66	1.91025	0.193821	1.53037e-23	1.90538e-22
YMR146C	5563.13	-2.08067	0.211692	1.64787e-23	2.04754e-22
YGR019W	6600.95	2.94692	0.302087	2.03091e-23	2.51841e-22
YHR072W-A	2680.62	-2.48618	0.254265	2.04466e-23	2.53037e-22
YNL314W	1086.49	2.02712	0.206514	2.10259e-23	2.59685e-22
YHR169W	1019.37	-3.59863	0.370411	2.31845e-23	2.85773e-22
YHR047C	3505.49	1.97332	0.201259	2.40192e-23	2.9547e-22
YLR063W	425.994	-3.16716	0.325867	2.66569e-23	3.27264e-22
YOL052C	1102.9	-2.48946	0.255503	2.878e-23	3.52626e-22
YGR280C	2472.83	-3.12794	0.322366	3.07646e-23	3.76195e-22
YBR029C	1719.64	-2.54545	0.261844	3.44475e-23	4.20395e-22
YHR170W	2748.72	-3.28843	0.339582	3.52106e-23	4.2886e-22
YNR069C	4640.8	3.58381	0.370676	4.16854e-23	5.0672e-22
YGR109C	164.253	-3.8222	0.395475	4.37149e-23	5.30344e-22
YPL227C	1136.72	-2.00324	0.205807	4.50847e-23	5.45888e-22
snR63	156.676	-3.81501	0.395793	5.66499e-23	6.84575e-22
YGL123C-A	115.523	-3.61103	0.374022	5.93652e-23	7.15984e-22
YOL119C	14455	2.78696	0.288759	7.13306e-23	8.58614e-22
YMR229C	3908.8	-3.49637	0.363839	7.43839e-23	8.93621e-22
YBL095W	1362.23	1.9134	0.197508	8.06174e-23	9.66625e-22
YNL004W	8941.94	1.703	0.1756	8.85474e-23	1.05965e-21
YNL293W	1631.77	2.16956	0.224695	8.9858e-23	1.07325e-21
YLR002C	1262.18	-3.45062	0.360799	9.8392e-23	1.1729e-21
YFR029W	1456.7	1.8671	0.193135	1.01885e-22	1.21219e-21
YDR190C	2585.1	-1.96044	0.203201	1.08236e-22	1.28528e-21
YBR295W	1207.6	1.92305	0.199442	1.23998e-22	1.46961e-21
YGL159W	1296.34	1.92871	0.200218	1.32116e-22	1.56282e-21
YPR058W	5340.73	1.78867	0.185939	1.76241e-22	2.08079e-21
YER118C	1336.85	-1.82613	0.190053	1.7928e-22	2.11263e-21
YDR080W	3797.47	2.44387	0.255496	1.80836e-22	2.12689e-21
YGL234W	11434.7	-2.79306	0.293148	1.95407e-22	2.29389e-21
YNR017W	2761.07	-1.84735	0.192675	2.13966e-22	2.50698e-21
YML022W	1675.41	-2.38267	0.249684	2.16605e-22	2.53308e-21
YBR171W	1300.82	-1.80717	0.188456	2.19774e-22	2.56528e-21
YNL125C	2125.88	2.10011	0.219807	2.49746e-22	2.90961e-21
YAL037W	348.052	2.58827	0.271927	2.65256e-22	3.08448e-21
YHR148W	769.003	-2.76664	0.291463	2.79965e-22	3.24938e-21
YKL151C	1364.43	2.25488	0.236618	2.84467e-22	3.29543e-21
YLR126C	1507.61	1.96458	0.205703	2.8976e-22	3.35045e-21
YKL209C	1034.98	2.12932	0.223295	2.94573e-22	3.39972e-21
YHR196W	2169.08	-2.8174	0.297134	3.01487e-22	3.47302e-21
YOR355W	2631.15	-1.94729	0.204204	3.23141e-22	3.71551e-21
YIL019W	883.811	-3.23745	0.342771	3.58348e-22	4.11266e-21
YFL022C	3562.41	-2.16284	0.227585	3.97021e-22	4.54804e-21
YLR097C	1696.07	1.85156	0.194292	3.97856e-22	4.54914e-21
YER043C	14422.9	-2.16486	0.228436	4.76045e-22	5.43309e-21
YLR037C	243.267	2.53774	0.268241	4.94061e-22	5.62828e-21
YLR008C	1133.48	-1.90019	0.200118	5.00091e-22	5.68646e-21
YIL165C	5373.97	2.73364	0.289687	5.18257e-22	5.88216e-21
YDL060W	2161.91	-3.51922	0.374812	5.39968e-22	6.11732e-21
YJL138C	8062.79	-2.10379	0.222388	5.41158e-22	6.11956e-21
YER175C	18668.2	3.88186	0.412639	5.43877e-22	6.13904e-21
YJR002W	2463.26	-2.74667	0.291587	5.64214e-22	6.35695e-21
YMR310C	842.173	-2.7071	0.287696	6.39719e-22	7.1945e-21
YEL060C	11916.9	2.71371	0.288426	6.42611e-22	7.21386e-21
YMR243C	4119.88	-1.94781	0.205929	6.69244e-22	7.49918e-21
YML082W	1168.46	-2.48852	0.264655	7.71071e-22	8.62451e-21
YGR044C	872.79	2.22349	0.236153	8.76015e-22	9.78058e-21
YEL055C	2082.93	-2.5544	0.272208	8.80556e-22	9.8135e-21
YDL051W	2517.28	-2.72714	0.29101	9.02032e-22	1.00347e-20
YMR093W	1328.22	-2.66616	0.284642	9.44008e-22	1.04827e-20
YOL138C	2121.5	1.90373	0.201951	9.96057e-22	1.10408e-20
YMR120C	13369.8	-3.06831	0.328602	1.04802e-21	1.1596e-20
YBR142W	1602.68	-3.28704	0.352659	1.13624e-21	1.25496e-20
YOR294W	1723.57	-3.13059	0.33573	1.16187e-21	1.28096e-20
YDR022C	568.436	2.10039	0.223974	1.38899e-21	1.52863e-20
YKL218C	12326.2	2.53197	0.272254	2.13592e-21	2.34647e-20
YEL041W	603.229	2.22727	0.239053	2.24821e-21	2.46543e-20
YLR227W-B	779.366	2.31633	0.249008	2.33283e-21	2.55369e-20
YGR038C-B	2363.56	1.86177	0.199413	2.45528e-21	2.68296e-20
YJR138W	2256.21	1.84968	0.198591	3.08411e-21	3.36413e-20
YNR065C	3729.99	2.32096	0.250492	3.11045e-21	3.38688e-20
YCR018C	353.198	3.07902	0.333761	3.3092e-21	3.59693e-20
YER036C	7940.5	-2.29572	0.247627	3.3275e-21	3.61045e-20
YMR217W	7647.55	-3.167	0.344018	3.60683e-21	3.90666e-20
YDR384C	3006.01	-2.43191	0.263286	3.82304e-21	4.13358e-20
YJL173C	2057.09	1.73527	0.186536	3.94008e-21	4.25267e-20
YOR111W	1138.67	1.88928	0.203596	4.08812e-21	4.40473e-20
YPL043W	2756.11	-3.06617	0.333574	4.14102e-21	4.45394e-20
snR39	117.006	-3.39971	0.369676	4.50132e-21	4.83304e-20
YBR228W	1296.75	1.75757	0.189346	4.60848e-21	4.93949e-20
YLL044W	222.185	-4.49893	0.491863	4.79321e-21	5.12857e-20
YGL111W	1572.02	-2.83011	0.308404	5.32399e-21	5.68662e-20
YOR337W	4820.52	1.89885	0.205419	5.51001e-21	5.87512e-20
YKL099C	945.39	-2.60365	0.283817	6.22734e-21	6.62851e-20
YNL075W	1264.1	-2.63519	0.287626	6.62809e-21	7.0338e-20
YIR005W	885.09	1.97778	0.214681	6.63092e-21	7.0338e-20
YOR224C	2273.46	-2.43554	0.265642	7.26618e-21	7.69441e-20
YDL039C	1080.95	-3.40026	0.373125	7.54005e-21	7.97073e-20
YCL031C	1696.66	-1.80627	0.196016	7.69487e-21	8.12046e-20
YIL053W	31843.6	-1.80316	0.195889	8.44325e-21	8.895e-20
YOR073W	484.827	-2.83906	0.311436	9.38944e-21	9.87493e-20
YEL033W	299.54	-2.88153	0.316136	9.50374e-21	9.97812e-20
YGL104C	879.563	2.80598	0.308217	1.14654e-20	1.20172e-19
YJL188C	107.037	-4.17549	0.45998	1.3442e-20	1.4065e-19
YDR126W	946.62	2.38359	0.261714	1.36854e-20	1.42954e-19
YHR215W	1064.33	-1.85059	0.202328	1.40037e-20	1.46031e-19
YCR016W	1144.59	-2.60513	0.287401	1.69257e-20	1.76204e-19
YPL265W	36175.5	3.01495	0.335107	1.71431e-20	1.78107e-19
YCL058W-A	229.724	-3.28372	0.36347	1.71662e-20	1.78107e-19
YIL164C	7795.87	2.88913	0.319679	1.99502e-20	2.06644e-19
YMR041C	781.505	1.92188	0.21124	2.27943e-20	2.35706e-19
YBR118W	48939	-1.95139	0.215083	2.49559e-20	2.57627e-19
YPL075W	2527.23	-1.70104	0.187116	2.65989e-20	2.74129e-19
YNL278W	1295.64	1.71632	0.189179	3.26501e-20	3.35931e-19
YIL009C-A	933.814	1.79785	0.198418	3.37895e-20	3.47075e-19
YGL248W	2070.41	2.42334	0.269204	3.53156e-20	3.62146e-19
YOR359W	1185.78	-2.67963	0.298768	3.8779e-20	3.97002e-19
YIL131C	625.495	-2.44495	0.272444	4.33384e-20	4.42509e-19
YJL109C	3702.35	-3.0448	0.340751	4.33677e-20	4.42509e-19
YGR067C	260.179	2.52752	0.281756	4.64206e-20	4.72876e-19
YML123C	12984.4	-1.75157	0.194005	5.06143e-20	5.14746e-19
YJL161W	314.963	3.06292	0.34323	5.5905e-20	5.67615e-19
YOL144W	830.367	-3.02638	0.340076	6.05292e-20	6.13555e-19
YLR221C	1580.22	-2.67586	0.300489	6.91834e-20	6.99979e-19
YNL116W	2076.85	1.76234	0.196138	6.92823e-20	6.99979e-19
YKR096W	2780.66	1.666	0.185332	7.33684e-20	7.40048e-19
YLR246W	1578.87	1.66413	0.185152	7.41654e-20	7.46865e-19
YKL001C	7544.56	-2.35192	0.26377	7.70631e-20	7.7478e-19
YFR001W	1256.22	-2.22307	0.249338	8.42017e-20	8.45171e-19
YFL001W	671.581	-2.5634	0.289377	1.12476e-19	1.12714e-18
YIL111W	2960.04	2.26607	0.25506	1.16709e-19	1.16766e-18
YOR056C	1692.61	-2.71685	0.307362	1.2164e-19	1.21502e-18
YNL186W	2804.76	-2.36396	0.26709	1.34942e-19	1.34571e-18
YKL068W-A	1025.22	-2.64874	0.300098	1.42695e-19	1.42073e-18
YER024W	15774	3.86788	0.441123	1.5839e-19	1.57445e-18
YPR112C	2256.84	-3.16783	0.361237	1.81765e-19	1.8039e-18
YHR122W	4388.61	2.16884	0.245559	1.84305e-19	1.82616e-18
YDR210C-D	547.29	2.57592	0.292564	1.9213e-19	1.90064e-18
YKR046C	3114.01	3.01408	0.343431	1.98644e-19	1.96192e-18
YPR143W	1516.1	-2.43261	0.276331	1.99019e-19	1.96249e-18
YDR399W	5978.86	-2.44115	0.277575	2.12674e-19	2.09378e-18
YLR180W	13703.4	-2.22498	0.252933	2.43e-19	2.38853e-18
YJR155W	1733.34	2.79355	0.318835	2.50621e-19	2.45952e-18
YOR315W	2573.15	-2.19532	0.249619	2.54104e-19	2.48974e-18
YDL063C	1440.54	-3.56922	0.409594	2.58695e-19	2.53069e-18
YGL188C-A	255.979	-2.98775	0.341944	2.72863e-19	2.66507e-18
YJL124C	1628.59	-1.82649	0.207351	3.04784e-19	2.97213e-18
YOL025W	931.974	1.84648	0.209714	3.1273e-19	3.0448e-18
YKL156W	7380.87	-2.11196	0.240916	3.46469e-19	3.36797e-18
YLR287C	806.227	-2.07109	0.23618	3.54003e-19	3.43578e-18
YJR056C	449.919	-2.06432	0.235561	3.73768e-19	3.6219e-18
YGR173W	1011.28	-2.4814	0.284491	3.96603e-19	3.83715e-18
YKL172W	3718.64	-2.44992	0.281055	4.2077e-19	4.06458e-18
YMR011W	3730.74	-3.63289	0.419693	4.26451e-19	4.11302e-18
YGR254W	20642.2	-2.42232	0.277996	4.46198e-19	4.29675e-18
YIL083C	2254.99	1.87772	0.214409	4.82353e-19	4.63766e-18
YAL061W	591.376	2.64411	0.304704	5.70254e-19	5.47426e-18
YNL016W	3950.39	-1.56742	0.178878	5.95218e-19	5.70502e-18
YPR137W	1961.62	-2.20013	0.252989	6.05649e-19	5.79598e-18
YNL015W	1924.77	2.48115	0.286027	6.55276e-19	6.26119e-18
YDR001C	4688.53	1.75615	0.201592	8.05392e-19	7.68361e-18
YER025W	4463.43	-2.07145	0.238731	8.06636e-19	7.68361e-18
YDR530C	1736.09	2.0616	0.23749	8.13485e-19	7.7369e-18
YGR285C	7635.08	-1.96517	0.22675	9.66711e-19	9.18004e-18
YOR276W	2452.74	-1.55961	0.17934	1.0768e-18	1.02097e-17
YLL011W	1318.29	-2.35307	0.273354	1.17587e-18	1.1132e-17
YDR533C	2323.15	1.91996	0.222023	1.19346e-18	1.12811e-17
YNR074C	1934.14	1.60343	0.18499	1.37608e-18	1.29874e-17
YJR010W	6615.3	-2.24402	0.261236	1.47372e-18	1.38876e-17
YOL010W	1092.44	-2.84751	0.333297	1.53597e-18	1.44522e-17
YJL033W	2217.3	-3.26925	0.383876	1.59547e-18	1.49892e-17
YMR079W	1870.6	-1.7483	0.202702	1.665e-18	1.56186e-17
YMR196W	2931.64	2.61622	0.306313	1.95432e-18	1.83047e-17
YLR056W	4745.55	-1.80562	0.210188	2.11414e-18	1.97715e-17
YER188W	358.482	2.16297	0.252649	2.20927e-18	2.06299e-17
YPL188W	2808.27	1.82392	0.212376	2.25903e-18	2.10626e-17
YJR154W	1560.14	2.87227	0.337875	2.36245e-18	2.19936e-17
RME3	251.613	2.41891	0.283554	2.41895e-18	2.24857e-17
YNL068C	1062.76	-1.80962	0.211307	2.6754e-18	2.48321e-17
YGR169C-A	1191.53	-2.26614	0.266094	2.74771e-18	2.54649e-17
YOR202W	7979.77	1.84442	0.215468	2.77828e-18	2.57095e-17
YPL012W	3908.89	-3.09573	0.365758	2.96835e-18	2.74272e-17
YJR078W	202.848	2.67033	0.314444	3.07203e-18	2.83427e-17
YCL037C	86.5905	-5.86084	0.679874	3.19361e-18	2.94204e-17
YBL009W	645.17	-2.05744	0.241582	3.22062e-18	2.96249e-17
YAL036C	1714.26	-2.82947	0.334622	3.2905e-18	3.02226e-17
YOL128C	959.032	2.39334	0.281971	3.3688e-18	3.08957e-17
YJR036C	520.163	2.23599	0.263022	3.45228e-18	3.16143e-17
YBR105C	4316.8	1.53331	0.179026	3.73941e-18	3.41929e-17
YCL059C	1718.75	-2.88215	0.341604	3.76237e-18	3.43518e-17
YHR094C	14932.8	-2.26567	0.26768	3.802e-18	3.46623e-17
YBL031W	366.348	-2.16535	0.255076	3.83091e-18	3.48743e-17
YHR208W	16097.8	-1.80236	0.211486	3.93564e-18	3.57749e-17
YML054C	521.943	1.88448	0.221497	4.37499e-18	3.97099e-17
YLR068W	737.033	-2.69746	0.320476	4.92748e-18	4.46589e-17
YLR058C	18599	-2.61643	0.310247	4.94781e-18	4.47773e-17
YDR070C	397.166	3.88227	0.463732	5.06223e-18	4.57456e-17
YBR021W	357.587	-3.23913	0.386486	5.27743e-18	4.76205e-17
YCR101C	477.318	2.47034	0.2929	5.29296e-18	4.76908e-17
YLR251W	355.084	2.7663	0.328661	5.30687e-18	4.77463e-17
snR84	134.959	-3.12918	0.372752	5.46288e-18	4.90783e-17
YOL091W	590.946	2.22414	0.263619	6.04124e-18	5.41953e-17
YBR085C-A	6611.29	2.45048	0.291338	6.46403e-18	5.79038e-17
YIL092W	1961.75	2.0885	0.24758	6.63481e-18	5.93473e-17
YEL017C-A	4368.34	-1.69758	0.200561	7.2455e-18	6.4716e-17
YPL223C	133.411	2.97902	0.356047	7.95043e-18	7.09096e-17
YBL069W	483.593	-1.86621	0.221326	7.9799e-18	7.10695e-17
YJL133C-A	11969.3	2.1681	0.258441	8.06287e-18	7.17049e-17
YML098W	2143.31	1.58261	0.187113	9.15814e-18	8.13279e-17
YNL101W	6181.55	1.83755	0.218278	9.53789e-18	8.45784e-17
YLR293C	9664.48	-1.64953	0.195594	9.75242e-18	8.63565e-17
YHR197W	1148.35	-3.55419	0.428615	9.81231e-18	8.67622e-17
YMR215W	2367.81	-2.93178	0.352554	1.02144e-17	9.01881e-17
YBR034C	3276.15	-2.14039	0.255839	1.08903e-17	9.60181e-17
YBL005W-B	1321.19	1.87983	0.224039	1.14839e-17	1.01108e-16
YOR366W	193.541	2.49638	0.299496	1.21189e-17	1.0635e-16
YLR356W	1914.54	2.31241	0.277066	1.2127e-17	1.0635e-16
YBR030W	822.773	-1.89827	0.226568	1.21311e-17	1.0635e-16
YDL201W	897.279	-2.7381	0.329661	1.23705e-17	1.08295e-16
YBR297W	764.776	2.69859	0.32468	1.25743e-17	1.09923e-16
YOR134W	102.959	3.74831	0.450837	1.36138e-17	1.18842e-16
YDL164C	844.325	-1.77359	0.211801	1.41755e-17	1.23569e-16
YMR255W	2196.26	1.53701	0.183094	1.55416e-17	1.35286e-16
YOR178C	126.318	3.46705	0.419543	1.58715e-17	1.37963e-16
YOL124C	1183.07	-2.79178	0.337671	1.62657e-17	1.41191e-16
YPL183C	1883.15	-2.47067	0.298051	1.65237e-17	1.43228e-16
YOR078W	1354.96	-2.178	0.26215	1.73067e-17	1.49805e-16
YOR040W	516.021	1.87281	0.224477	1.7741e-17	1.53349e-16
YJR096W	910.739	2.04562	0.245942	1.82573e-17	1.5759e-16
YLR363W-A	411.118	-2.73828	0.331584	1.85641e-17	1.60015e-16
YHR067W	966.352	1.64994	0.197637	2.05987e-17	1.77304e-16
YGR128C	1648.32	-2.90912	0.353375	2.08347e-17	1.79085e-16
YER127W	1215.43	-2.43542	0.294732	2.11141e-17	1.81235e-16
YKL027W	1076.34	-1.94297	0.234008	2.20127e-17	1.88685e-16
YMR280C	174.7	2.46661	0.298528	2.33531e-17	1.99896e-16
YHR202W	1315.37	2.17136	0.262239	2.34266e-17	2.00247e-16
YHR028W-A	79.6902	4.26556	0.514956	2.43116e-17	2.07524e-16
YGR260W	2532.44	-1.62556	0.195695	2.85729e-17	2.43561e-16
YCR068W	1476.94	1.82484	0.220348	3.10062e-17	2.63938e-16
YDL215C	3661.02	1.86087	0.224963	3.12483e-17	2.65632e-16
YOL044W	852.307	1.69786	0.204772	3.21382e-17	2.72821e-16
YLR017W	1354.15	-2.05783	0.249597	3.26934e-17	2.77152e-16
YLR355C	35060.1	-1.46672	0.176569	3.43032e-17	2.90399e-16
YOR020W-A	981.249	1.9155	0.232679	4.2902e-17	3.62696e-16
YGL249W	160.414	2.67713	0.327935	4.70412e-17	3.97143e-16
YDL205C	1452.12	-1.85814	0.226021	4.71355e-17	3.97396e-16
YGL185C	407.173	1.98099	0.241204	4.76451e-17	4.01143e-16
YNR029C	702.532	-1.90647	0.232202	4.90303e-17	4.12242e-16
YOR221C	3161.7	1.97059	0.240345	4.93312e-17	4.13997e-16
YPR151C	136.295	2.65657	0.325201	4.93733e-17	4.13997e-16
YGR028W	1416.3	1.61188	0.19544	5.01186e-17	4.19675e-16
YEL003W	1137.46	-1.69243	0.205859	5.52246e-17	4.61804e-16
YOL019W	5322.51	2.01595	0.246488	5.85347e-17	4.8882e-16
YKL181W	4399.04	-2.34317	0.287731	5.91556e-17	4.93337e-16
YLR060W	5649.18	-1.76228	0.214968	6.23414e-17	5.19203e-16
YDR045C	658.336	-2.05535	0.251851	6.5599e-17	5.45596e-16
YGR021W	453.939	-1.8141	0.221612	6.62385e-17	5.50172e-16
YER184C	720.442	1.96598	0.240862	7.36591e-17	6.10984e-16
YPL214C	1496.48	1.60272	0.195324	7.44232e-17	6.16492e-16
YPL150W	2182.53	1.50313	0.183124	7.76624e-17	6.42461e-16
YGR200C	2082.88	-2.55181	0.315519	8.35999e-17	6.90651e-16
YEL062W	977.748	1.63341	0.199622	8.37497e-17	6.90963e-16
YJL010C	1053.67	-2.63636	0.326352	8.60584e-17	7.09062e-16
YFL023W	1059.08	-2.58745	0.32021	8.69886e-17	7.15768e-16
YGR140W	743.478	-1.73415	0.212554	8.94457e-17	7.35005e-16
YGL253W	15255.9	-1.63091	0.200011	8.95854e-17	7.35173e-16
YOL103W	2209.46	-1.53718	0.187924	9.09715e-17	7.45555e-16
YLR249W	57335.9	-2.22975	0.275188	9.70993e-17	7.94718e-16
YML125C	3102.48	-2.0779	0.256545	9.99315e-17	8.16814e-16
YDR315C	711.131	2.24919	0.277944	1.0571e-16	8.62898e-16
YOL080C	759.876	-2.68245	0.333259	1.06778e-16	8.70467e-16
YNL311C	3291.81	2.04541	0.252793	1.2369e-16	1.007e-15
YEL036C	2775.51	-1.55033	0.190538	1.28431e-16	1.04285e-15
YHR040W	669.454	-2.69351	0.335605	1.28431e-16	1.04285e-15
YLR001C	1759.49	1.70944	0.210501	1.3012e-16	1.05517e-15
YMR279C	208.664	2.78328	0.34633	1.30929e-16	1.06033e-15
YPR193C	138.771	2.58479	0.321394	1.42008e-16	1.14855e-15
YPR044C	122.264	-3.44484	0.431372	1.47005e-16	1.18741e-15
YEL064C	1022.95	1.73341	0.213979	1.50144e-16	1.21118e-15
YHR068W	3119.18	-1.66346	0.205567	1.65075e-16	1.32988e-15
YLR189C	2971.93	1.72974	0.213885	1.69651e-16	1.36496e-15
YJR101W	751.657	-1.7413	0.215675	1.78239e-16	1.43219e-15
YPR080W	36728.6	-2.05796	0.256522	1.8677e-16	1.49878e-15
YFR046C	937.556	1.603	0.198249	1.91894e-16	1.5379e-15
YJL080C	5109.53	-1.61528	0.199923	1.92147e-16	1.53793e-15
YLL039C	11152.7	2.04326	0.254519	2.04579e-16	1.6353e-15
YER174C	1838.9	1.61302	0.199738	2.07158e-16	1.65377e-15
YNL065W	2081.64	-1.88319	0.234514	2.2169e-16	1.7675e-15
YKL183W	723.29	-1.75524	0.21895	2.80077e-16	2.23012e-15
YJL050W	2480.8	-3.16001	0.400278	2.92934e-16	2.32949e-15
YDL095W	4971.56	-1.46612	0.182373	3.07399e-16	2.44137e-15
YDR317W	134.707	3.14378	0.397495	3.11276e-16	2.46898e-15
YPL050C	3204.95	-1.4497	0.180351	3.16225e-16	2.50501e-15
YPR065W	2912.17	-1.8215	0.228208	3.50673e-16	2.77432e-15
YGR245C	2969.68	-2.75884	0.349825	3.74976e-16	2.96279e-15
YOR329W-A	74.8272	4.16697	0.524479	3.78385e-16	2.9859e-15
YML053C	515.026	-1.7236	0.216075	4.00241e-16	3.15433e-15
YPL146C	2023.73	-2.1588	0.272417	4.226e-16	3.32629e-15
YMR043W	1513.83	-1.5787	0.197822	4.47845e-16	3.5205e-15
YPL246C	1767.49	-1.68972	0.212277	4.71096e-16	3.69855e-15
YLL056C	210.491	2.29939	0.290779	4.79918e-16	3.76302e-15
YMR186W	26596	-1.59961	0.200761	4.82185e-16	3.776e-15
YEL071W	47292	2.16947	0.274211	4.84757e-16	3.79132e-15
YCR005C	42408.4	3.21143	0.407984	4.93323e-16	3.85342e-15
YMR322C	71.4901	4.63543	0.582817	5.09765e-16	3.97681e-15
YMR104C	1228.98	1.78017	0.224142	5.16967e-16	4.0279e-15
YGR161W-C	496.341	1.96592	0.248602	5.89692e-16	4.58872e-15
YER175W-A	115.973	3.18284	0.405679	5.90784e-16	4.59143e-15
YPL063W	2752.69	-1.41269	0.177622	6.58895e-16	5.11432e-15
YBR283C	6686.76	-1.36977	0.172529	6.85148e-16	5.3114e-15
YFR025C	4293.49	1.65703	0.209432	6.93826e-16	5.37192e-15
YCL002C	705.356	-1.80928	0.229107	6.98047e-16	5.39783e-15
YOR391C	73.9903	5.04898	0.634745	7.13909e-16	5.51356e-15
YNL141W	1349.36	-3.49895	0.450482	7.1537e-16	5.51793e-15
YIR038C	2788.73	1.95608	0.248335	7.3778e-16	5.68367e-15
YOR119C	1220.46	-2.25817	0.288152	7.74548e-16	5.95947e-15
YFL045C	7012.52	-1.40312	0.176772	7.7725e-16	5.97281e-15
YEL012W	993.494	1.97143	0.250654	8.17553e-16	6.27469e-15
YMR019W	4390.69	1.91968	0.244244	8.18584e-16	6.27479e-15
YOR035C	1390.07	1.60075	0.202404	8.30017e-16	6.35453e-15
YDR041W	1876.26	1.47352	0.185974	8.31214e-16	6.3558e-15
YLR198C	107.954	-4.28245	0.552245	8.48909e-16	6.48306e-15
YGL005C	2361.5	1.45724	0.184088	8.87813e-16	6.77178e-15
YGL102C	179.556	-2.94846	0.379385	9.02688e-16	6.87672e-15
YIL059C	725.671	1.62609	0.206225	9.58538e-16	7.29317e-15
YBL015W	1727.7	2.11083	0.270432	1.14956e-15	8.72665e-15
YHR142W	1180.74	-1.60048	0.203624	1.14977e-15	8.72665e-15
YDR172W	5750.4	-1.52215	0.193544	1.17095e-15	8.87643e-15
YDR515W	423.944	-1.71673	0.218868	1.17581e-15	8.90232e-15
YPR124W	766.94	-1.57504	0.200371	1.18133e-15	8.93315e-15
YPR149W	7686.33	-3.33622	0.432342	1.22158e-15	9.22619e-15
YJL199C	484.145	2.08821	0.267699	1.25806e-15	9.4901e-15
YER082C	1479.99	-2.59543	0.335575	1.37768e-15	1.03798e-14
YGL226C-A	1065.68	-1.5058	0.191878	1.40356e-15	1.05618e-14
YBL004W	2115.86	-3.11791	0.405119	1.42627e-15	1.07197e-14
YGR023W	998.459	1.78117	0.228008	1.46996e-15	1.10345e-14
YGR080W	1985.71	1.69838	0.217231	1.51762e-15	1.13785e-14
YBR161W	450.796	-1.9082	0.245063	1.53008e-15	1.1458e-14
YAL035W	6749.21	-1.74438	0.223566	1.55054e-15	1.15971e-14
YOR116C	2609.22	-2.11301	0.27215	1.55738e-15	1.16341e-14
YGR079W	1187.17	-2.08931	0.269147	1.58012e-15	1.17897e-14
tN(GUU)N1	83.2594	3.76675	0.486835	1.59189e-15	1.18632e-14
YER091C	57975.3	-1.62787	0.208361	1.59906e-15	1.19022e-14
YJR130C	8814.1	2.81406	0.365561	1.79432e-15	1.33395e-14
YDR093W	1992.39	-1.45337	0.185895	1.87257e-15	1.39044e-14
YLL057C	270.275	1.94172	0.250464	2.0824e-15	1.54439e-14
YMR296C	2863.88	-1.44277	0.184915	2.14385e-15	1.58805e-14
YLR106C	3047.9	-2.56123	0.333413	2.1485e-15	1.58958e-14
YBR033W	145.513	2.38916	0.310034	2.24282e-15	1.65737e-14
YNL255C	5935.07	-1.95769	0.253298	2.29956e-15	1.69726e-14
YDR380W	231.311	3.12609	0.408778	2.45339e-15	1.80864e-14
tD(GUC)N	154.695	2.61185	0.340719	2.62772e-15	1.93484e-14
YDR287W	1297.76	1.57537	0.202989	2.68869e-15	1.97737e-14
YDR417C	94.9334	-2.98174	0.390058	2.7032e-15	1.98567e-14
YOR133W	9969.49	-1.51273	0.194992	2.7703e-15	2.03255e-14
YGR095C	836.703	-2.01799	0.262196	2.83446e-15	2.07714e-14
YNL145W	142.742	2.55322	0.333647	3.11615e-15	2.28086e-14
YBR238C	1181.22	-1.91011	0.248474	3.33327e-15	2.43688e-14
YER037W	1503	3.02692	0.398481	3.36997e-15	2.4608e-14
YKL084W	1064.18	1.92961	0.251091	3.49171e-15	2.54667e-14
YJL155C	1032.02	1.75052	0.227284	3.60903e-15	2.62913e-14
YNL335W	94.7283	3.11954	0.409324	3.65419e-15	2.65889e-14
YHR149C	1009.81	-1.63005	0.211423	3.66758e-15	2.66549e-14
YMR307W	23149.2	-1.39414	0.180282	3.67855e-15	2.67031e-14
YKR024C	1083.29	-2.45382	0.322157	3.78395e-15	2.74359e-14
YPR163C	7599.22	-1.84145	0.239081	3.83863e-15	2.77996e-14
YDR398W	3203.64	-2.25675	0.295756	3.88435e-15	2.80977e-14
YFR008W	476.486	1.7669	0.229809	3.96369e-15	2.8638e-14
YPL126W	2911.24	-2.57646	0.338786	4.39952e-15	3.17497e-14
YER039C	422.609	2.29489	0.301388	4.65386e-15	3.35459e-14
YDR165W	1401.96	-2.3494	0.309241	4.72463e-15	3.40162e-14
YGR240C	17524.2	-1.315	0.170434	4.87191e-15	3.50357e-14
YMR181C	1337.08	1.82385	0.238429	5.03287e-15	3.6151e-14
YPL031C	3203.16	1.59034	0.207372	5.59392e-15	4.01343e-14
YLR276C	2487.97	-2.35334	0.310815	5.72899e-15	4.10555e-14
YGR032W	4373.54	1.93171	0.253529	5.79851e-15	4.15054e-14
YOL117W	772.128	1.84371	0.241955	6.28507e-15	4.4936e-14
YNL046W	1459.02	1.42086	0.185132	6.31709e-15	4.51127e-14
YOR006C	807.942	-2.02603	0.267009	6.49975e-15	4.63634e-14
YOL107W	825.265	1.68123	0.220241	6.58185e-15	4.68947e-14
YML064C	459.185	-1.67995	0.22024	6.61476e-15	4.70748e-14
YBR241C	1439.92	1.8167	0.238684	6.92513e-15	4.92267e-14
YCL049C	1235.97	1.88723	0.248485	6.99851e-15	4.9691e-14
YFL002C	1092.74	-2.18861	0.28948	7.058e-15	5.00558e-14
YGL154C	975.544	1.86572	0.245652	7.47814e-15	5.29745e-14
YPR016C	3703.03	-1.75973	0.23161	7.668e-15	5.42571e-14
YCL064C	451.076	2.43112	0.322925	8.08524e-15	5.71437e-14
YLR311C	73.9247	5.50793	0.716556	8.27181e-15	5.83954e-14
YBR047W	1349.63	2.93696	0.392371	8.42503e-15	5.9409e-14
YML060W	383.799	-1.7794	0.234742	8.69452e-15	6.12392e-14
YHR065C	1386.37	-2.38443	0.317337	8.72026e-15	6.13504e-14
YDR454C	2901.54	-1.60727	0.211627	9.14118e-15	6.42384e-14
YBR227C	2315.62	1.514	0.199287	1.03302e-14	7.25111e-14
YLR178C	1519.67	2.39764	0.320184	1.10874e-14	7.77216e-14
YIL091C	1761.84	-2.5522	0.341761	1.10977e-14	7.77216e-14
YMR012W	5170.57	-1.4879	0.196191	1.12601e-14	7.87694e-14
YMR308C	3425.75	-1.86551	0.247863	1.20089e-14	8.39128e-14
YDR062W	3616.29	-1.39063	0.182747	1.23414e-14	8.61383e-14
YDR207C	615.721	-1.91766	0.25523	1.27131e-14	8.85392e-14
YEL059W	65.8827	4.86336	0.642952	1.27141e-14	8.85392e-14
YIL027C	795.138	-1.47863	0.195476	1.32965e-14	9.24902e-14
YDR152W	1614.85	-1.74821	0.232262	1.33797e-14	9.29642e-14
YHR085W	795.948	-2.36547	0.317119	1.34346e-14	9.32407e-14
YPL266W	1098.43	-2.53906	0.341293	1.38889e-14	9.62852e-14
YJR119C	553.268	1.8164	0.241793	1.46028e-14	1.0112e-13
YNL246W	1209.36	-1.72701	0.229743	1.47301e-14	1.01887e-13
YBR078W	18307.6	-1.40587	0.186005	1.49942e-14	1.03598e-13
YNL252C	589.781	-1.62858	0.21634	1.50217e-14	1.03671e-13
YOL112W	2492.57	1.36716	0.180691	1.52135e-14	1.04878e-13
YER119C	2537.59	1.9318	0.257836	1.55426e-14	1.07027e-13
YOR232W	2742.91	-1.3684	0.181103	1.56438e-14	1.07603e-13
YER010C	1510.39	1.57063	0.20859	1.62366e-14	1.11557e-13
YDL142C	1009.6	1.76124	0.23506	1.82931e-14	1.25546e-13
YBR017C	2053.35	-1.69496	0.226232	1.8346e-14	1.25769e-13
YDR245W	3052.73	-1.42572	0.189657	1.85721e-14	1.27178e-13
YKL120W	6818.04	-1.36803	0.181709	2.09779e-14	1.43492e-13
YNL064C	8914.07	-1.81877	0.244072	2.19473e-14	1.49957e-13
YGR288W	610.486	1.87337	0.251491	2.26315e-14	1.54461e-13
YLR172C	1681.53	-1.84388	0.247741	2.26877e-14	1.54673e-13
YKR080W	2348.11	-2.27661	0.307801	2.2892e-14	1.55893e-13
YMR135C	3258.56	1.60777	0.214913	2.3051e-14	1.56803e-13
YHR107C	1431.02	-1.45129	0.193663	2.33922e-14	1.58948e-13
YPL047W	1117.42	1.52451	0.203716	2.43855e-14	1.65515e-13
YNR015W	851.237	-1.99325	0.268789	2.48912e-14	1.68762e-13
YDR391C	1116.73	1.66584	0.223406	2.58013e-14	1.7474e-13
YDL003W	1396.66	-2.08	0.281145	2.63841e-14	1.78491e-13
YHR022C	134.773	2.36762	0.320616	2.70684e-14	1.82919e-13
YBL078C	746.2	2.40721	0.327052	2.91425e-14	1.96668e-13
YKL155C	2053.65	1.58578	0.212819	2.91667e-14	1.96668e-13
YPR133W-A	1782.06	-1.36019	0.182231	3.24157e-14	2.18336e-13
YJL125C	1098.34	-2.29722	0.312792	3.3076e-14	2.22541e-13
YOR051C	2289.08	-1.75831	0.237524	3.31207e-14	2.22599e-13
YLR193C	1345.8	1.45023	0.194635	3.35147e-14	2.25001e-13
YGL068W	1409.33	-1.37796	0.184906	3.48012e-14	2.33384e-13
YHR037W	3739.53	1.68238	0.227284	3.49483e-14	2.34116e-13
YPL119C	324.857	1.78621	0.241754	3.88029e-14	2.59655e-13
YER176W	4630.17	1.76777	0.239371	4.02193e-14	2.68841e-13
YJL034W	10343.4	-1.62522	0.219719	4.04183e-14	2.69878e-13
YOL020W	2424.94	-1.50406	0.203105	4.3107e-14	2.8752e-13
YBR192W	692.676	-1.56567	0.211789	4.4719e-14	2.9795e-13
YDR461C-A	538.151	1.73565	0.2354	4.52492e-14	3.01157e-13
YGR183C	1793.45	1.61998	0.219318	4.60113e-14	3.05898e-13
YJL134W	1209.05	-1.54633	0.209248	4.77277e-14	3.16967e-13
YMR095C	4839.36	1.50536	0.203681	4.83373e-14	3.2067e-13
YIL101C	131.515	2.6951	0.37052	5.28056e-14	3.49937e-13
YHR005C-A	2788.56	-1.35374	0.182993	5.30146e-14	3.50944e-13
YIL046W	2407.16	1.39014	0.187891	5.31873e-14	3.51709e-13
YKL113C	1254.03	-1.52013	0.206127	5.3327e-14	3.51985e-13
YOR363C	2623.18	1.71388	0.233103	5.33431e-14	3.51985e-13
YJL185C	477.299	1.94849	0.265954	5.36056e-14	3.53338e-13
YJR063W	900.332	-2.6194	0.361393	5.51301e-14	3.62999e-13
YOR372C	928.365	-1.81448	0.247513	5.52831e-14	3.63618e-13
YGL114W	5181.52	1.62135	0.220604	6.062e-14	3.98295e-13
YGR083C	1866.88	-1.69392	0.231065	6.10402e-14	4.00629e-13
YJL111W	4250.51	-1.31648	0.178265	6.20051e-14	4.06529e-13
YLR346C	146.585	2.4887	0.342658	6.25875e-14	4.09911e-13
YER145C	3137.69	-1.44333	0.196134	6.52864e-14	4.27134e-13
YMR008C	3160.1	1.64546	0.224346	6.60273e-14	4.31523e-13
YMR026C	1783.9	1.54628	0.210584	6.85649e-14	4.47633e-13
YBR045C	372.815	2.61219	0.361313	6.95187e-14	4.5338e-13
YDR077W	53817.4	1.72037	0.236977	7.31018e-14	4.76243e-13
YMR178W	2248.81	1.38853	0.188813	7.46391e-14	4.85745e-13
YHL023C	2668.68	1.32825	0.180492	7.63766e-14	4.96528e-13
YOR004W	1143.84	-2.53467	0.351819	8.01678e-14	5.20626e-13
YHR015W	182.086	2.31733	0.32043	8.18669e-14	5.31101e-13
YJL056C	1592.8	1.48569	0.202841	8.37391e-14	5.42675e-13
YNL294C	3042.03	1.42223	0.194075	8.86441e-14	5.73858e-13
YJL077C	140.839	2.33061	0.322625	8.98579e-14	5.81106e-13
YDR098C-B	272.371	2.44974	0.340223	9.15437e-14	5.91388e-13
YLR054C	130.438	2.54471	0.353175	9.19107e-14	5.93137e-13
YDL241W	196.577	-2.33527	0.32453	9.98447e-14	6.43664e-13
YOR019W	630.044	1.51652	0.208077	1.0566e-13	6.80443e-13
YJR004C	1183.19	1.45991	0.200159	1.08106e-13	6.95469e-13
YKL162C-A	84.1595	2.92452	0.40804	1.16571e-13	7.49143e-13
YPL237W	5596.43	-1.5827	0.21814	1.21259e-13	7.78456e-13
YLR359W	10349.5	-1.9566	0.271947	1.29371e-13	8.29673e-13
YDR425W	1306.73	1.58856	0.219174	1.33045e-13	8.52347e-13
YDR156W	622.601	-1.57197	0.216985	1.33378e-13	8.53591e-13
YLR336C	1262.15	-2.40525	0.33665	1.34171e-13	8.57777e-13
YFL042C	1453.14	1.54936	0.213649	1.35969e-13	8.68368e-13
YHL021C	1200.93	2.45209	0.34317	1.37668e-13	8.78313e-13
YDR331W	1024.99	-1.4031	0.19314	1.40602e-13	8.96103e-13
YMR096W	62043.4	1.56078	0.215562	1.45574e-13	9.26829e-13
YBR081C	2747.55	1.32844	0.182679	1.46269e-13	9.30296e-13
YLL031C	1617.57	-1.38368	0.190649	1.47333e-13	9.36099e-13
YLR094C	1515.34	1.50263	0.207535	1.52434e-13	9.67507e-13
YOR046C	2141.84	-1.63107	0.22603	1.53777e-13	9.7503e-13
YER122C	3353.3	-1.41944	0.195965	1.58538e-13	1.00418e-12
YFR032C-B	194.828	-2.35468	0.330217	1.59026e-13	1.00624e-12
YER160C	420.643	1.60922	0.223134	1.6936e-13	1.07053e-12
YPR046W	552.29	1.64057	0.228079	1.88838e-13	1.19242e-12
YOR140W	1181.23	-1.43502	0.199135	2.04371e-13	1.28705e-12
YML106W	4393.79	-1.51984	0.211279	2.04405e-13	1.28705e-12
YDL122W	2245.01	-1.5797	0.219782	2.0445e-13	1.28705e-12
YHR204W	1281.21	-1.48023	0.205614	2.05077e-13	1.28969e-12
YDR272W	2073.52	1.3576	0.187936	2.08093e-13	1.30732e-12
YNL119W	980.532	-2.08951	0.293737	2.13366e-13	1.33908e-12
YLR076C	86.3305	-2.99917	0.425295	2.19936e-13	1.3789e-12
YOR254C	4004.79	-1.44119	0.200349	2.23749e-13	1.40139e-12
YCR007C	256.796	1.9241	0.269836	2.33692e-13	1.46218e-12
YNL166C	1216.23	-1.40835	0.196091	2.49096e-13	1.55698e-12
YBR220C	1013.7	-1.36711	0.190405	2.66998e-13	1.66718e-12
YBR106W	9043.75	-1.27681	0.177891	2.96196e-13	1.84763e-12
YOR011W	1671.28	1.38325	0.193029	2.99307e-13	1.86514e-12
YEL022W	1610.58	-1.355	0.189524	3.08922e-13	1.92312e-12
YKR015C	65.9202	3.39074	0.482332	3.22497e-13	2.0056e-12
YHR113W	2702.8	1.41834	0.198316	3.35628e-13	2.08516e-12
YMR205C	12571.9	-1.3527	0.189322	3.39513e-13	2.10717e-12
YNR064C	77.4137	3.10164	0.443269	3.83087e-13	2.37522e-12
YLR100W	3668.63	1.35655	0.190092	3.85242e-13	2.38618e-12
YDL200C	709.264	1.6183	0.22801	3.88032e-13	2.40104e-12
YLL034C	1759.97	-2.32322	0.331679	3.91371e-13	2.41928e-12
YGR190C	66.6632	3.57544	0.51148	4.21491e-13	2.60286e-12
YML065W	1026.96	-1.5138	0.213419	4.27782e-13	2.63906e-12
YOR208W	1163.71	1.46258	0.20586	4.30166e-13	2.65111e-12
YDR161W	1280.28	-2.18416	0.312143	4.55571e-13	2.80488e-12
YLR262C-A	2647.77	-1.46357	0.206447	4.59915e-13	2.8288e-12
YMR078C	683.426	-1.50069	0.211872	4.68366e-13	2.8779e-12
YNL242W	1389.73	1.58155	0.223653	4.87293e-13	2.99122e-12
YLR216C	3041.55	-1.41445	0.199684	5.09846e-13	3.12655e-12
YPL280W	78.1082	3.73356	0.538541	5.74912e-13	3.52205e-12
YOR188W	896.111	-1.70532	0.242775	5.75738e-13	3.52361e-12
YMR103C	357.017	1.72106	0.244988	5.84659e-13	3.57465e-12
YML115C	1605.28	-1.41591	0.200348	5.93972e-13	3.62799e-12
YDL236W	5137.45	1.29286	0.182357	6.09106e-13	3.71675e-12
YNR066C	726.942	2.14595	0.308155	6.27179e-13	3.82325e-12
YIL096C	389.603	-2.81293	0.408097	6.41588e-13	3.90722e-12
YPR158C-D	905.484	2.02435	0.290661	6.84314e-13	4.1633e-12
YDL049C	678.276	-1.52831	0.217663	7.0571e-13	4.28924e-12
YHR062C	811.915	-2.14233	0.308778	7.18202e-13	4.36087e-12
YGR158C	859.025	-1.94006	0.27882	7.37526e-13	4.47379e-12
YKL023W	1827.19	1.69107	0.241823	7.60541e-13	4.60886e-12
YPL094C	2332.5	-1.38176	0.196583	7.82503e-13	4.73729e-12
YPR187W	3118.32	-1.70299	0.243977	7.90203e-13	4.77922e-12
YJL025W	390.074	-1.98684	0.286379	8.26643e-13	4.99471e-12
YDR224C	13542.1	-1.58194	0.226652	8.74547e-13	5.27898e-12
YOR091W	1857.65	-1.99852	0.288718	9.02398e-13	5.44176e-12
YNL207W	1114.44	-1.85272	0.267051	9.2233e-13	5.55652e-12
YER125W	3587.19	-1.26789	0.1807	9.68317e-13	5.82787e-12
YOR239W	2826.18	-1.23681	0.176186	9.76406e-13	5.87082e-12
YKL166C	598.443	-1.56896	0.225155	9.79647e-13	5.88456e-12
YER110C	3641.5	-2.59946	0.379668	9.95611e-13	5.97463e-12
YBR166C	2424.34	1.40543	0.200916	1.01071e-12	6.05935e-12
YMR070W	1316.12	-1.46905	0.210575	1.02752e-12	6.15413e-12
YKR004C	789.489	1.54279	0.221319	1.03004e-12	6.16326e-12
YLR244C	3740.04	-1.5137	0.217438	1.06932e-12	6.39208e-12
YBL089W	1496.37	1.40252	0.200775	1.07835e-12	6.43982e-12
snR86	811.084	-1.52886	0.219829	1.13659e-12	6.78104e-12
YLR130C	3264.86	-1.2915	0.184818	1.1538e-12	6.87704e-12
YPL142C	49.5427	-4.26243	0.621989	1.16573e-12	6.94143e-12
YCR024C-A	3753.73	-1.2882	0.185311	1.23461e-12	7.34448e-12
YCL024W	479.841	-1.95316	0.283756	1.24259e-12	7.38486e-12
YDL228C	45.3921	-4.28928	0.624803	1.26027e-12	7.4783e-12
YLL063C	447.396	1.55464	0.223959	1.26074e-12	7.4783e-12
YKR101W	743.393	1.4049	0.201778	1.2644e-12	7.49281e-12
YER023C-A	108.823	2.51858	0.368035	1.27535e-12	7.55041e-12
YPL052W	1439.87	1.43714	0.206598	1.27848e-12	7.56171e-12
YDR334W	1745.92	-1.26936	0.181992	1.29911e-12	7.67634e-12
YDL033C	329.893	-1.62615	0.234995	1.31651e-12	7.77167e-12
YJL115W	1179.26	-1.50779	0.217759	1.43962e-12	8.49031e-12
YKR076W	686.763	2.1611	0.315827	1.46256e-12	8.61738e-12
YDR359C	1001.03	-1.58823	0.229933	1.47022e-12	8.65422e-12
YML080W	694.886	-1.57871	0.228469	1.47497e-12	8.66662e-12
YEL053W-A	53.9839	-5.37322	0.777576	1.47514e-12	8.66662e-12
YKR079C	982.44	-2.27287	0.333326	1.49922e-12	8.79968e-12
YLR405W	720.577	-1.62148	0.234965	1.50157e-12	8.80511e-12
YDL024C	113.636	2.41681	0.354162	1.51164e-12	8.85575e-12
YJL060W	5104.32	1.60789	0.232794	1.52062e-12	8.89988e-12
YDL206W	899.673	1.61489	0.233844	1.53121e-12	8.95237e-12
YLL060C	450.427	1.61889	0.234477	1.53249e-12	8.95237e-12
YNL181W	699.89	-1.56638	0.226968	1.58924e-12	9.27507e-12
YJL198W	2491.09	-2.04929	0.300123	1.62817e-12	9.4933e-12
YJR019C	780.708	1.61808	0.234675	1.64782e-12	9.59881e-12
YMR169C	387.716	1.87889	0.273955	1.66737e-12	9.70347e-12
YIL066C	205.294	2.31833	0.34071	1.67309e-12	9.7276e-12
YAL063C	386.18	1.61685	0.234619	1.67808e-12	9.7474e-12
YJR027W	554.362	1.92273	0.280787	1.69792e-12	9.85339e-12
YER119C-A	65.0692	3.28971	0.484422	1.71054e-12	9.91728e-12
YDR059C	1134.14	1.90565	0.27833	1.75948e-12	1.01914e-11
YPL262W	6728.27	1.43678	0.208016	1.81698e-12	1.05146e-11
YPL166W	427.231	2.0436	0.2996	1.88459e-12	1.08956e-11
YLL046C	69.1327	3.23052	0.478009	1.88718e-12	1.09004e-11
YJR067C	278.867	-1.68293	0.245351	1.91268e-12	1.10373e-11
YMR292W	774.165	-1.52288	0.221425	1.96167e-12	1.13094e-11
YDR412W	1352.6	-1.87842	0.275712	2.16059e-12	1.24446e-11
YLR083C	4411.7	-1.46654	0.213423	2.16792e-12	1.24752e-11
YMR106C	736.309	1.60305	0.233829	2.19988e-12	1.26472e-11
YBR046C	3503.2	2.62715	0.39051	2.37313e-12	1.36306e-11
YBR087W	661.978	-1.43863	0.209768	2.46701e-12	1.41566e-11
YPL057C	1687.2	-1.25896	0.182891	2.5145e-12	1.44157e-11
YDL157C	612.186	-1.67212	0.245235	2.54317e-12	1.45665e-11
YKL096W	1343.04	-1.63613	0.239822	2.58088e-12	1.47688e-11
YOR185C	1403.71	2.553	0.379867	2.59726e-12	1.48487e-11
YJL183W	2088.79	-1.36375	0.198753	2.6107e-12	1.49117e-11
YPL160W	7665.92	-1.44792	0.211294	2.6143e-12	1.49184e-11
YIL026C	2148.94	1.30614	0.189937	2.62027e-12	1.49387e-11
YPR057W	1866.58	1.27125	0.184783	2.63656e-12	1.50177e-11
YDR212W	3121.95	-1.23598	0.179504	2.6538e-12	1.51019e-11
YKR047W	143.625	-2.23046	0.330676	2.66488e-12	1.5151e-11
YFL061W	84.3026	2.78439	0.414095	2.72711e-12	1.54905e-11
YOR128C	4148.99	-1.45845	0.213542	2.79176e-12	1.58431e-11
YOL154W	2153.53	-2.15664	0.320011	2.80819e-12	1.59217e-11
YER081W	12238.2	1.72352	0.254341	2.82694e-12	1.60133e-11
YDR371C-A	100.622	7.18869	1.00532	2.89644e-12	1.63919e-11
YBR141C	364.673	-2.42389	0.361386	2.90908e-12	1.64483e-11
YGL229C	1056.87	1.82833	0.269818	2.91693e-12	1.64776e-11
YGR187C	1647.54	-1.66232	0.244561	2.98363e-12	1.68389e-11
YGR063C	767.706	-1.42673	0.20884	3.00082e-12	1.69204e-11
YDR321W	1557.69	-1.7741	0.261943	3.1408e-12	1.76936e-11
YFL021W	2739.37	1.336	0.195201	3.14565e-12	1.77047e-11
YOR217W	1541.15	-1.28513	0.187888	3.16532e-12	1.77992e-11
YAR002C-A	2767.85	-1.22604	0.179052	3.33284e-12	1.8724e-11
YGR142W	714.096	-1.95822	0.290997	3.58947e-12	2.01475e-11
YOR376W-A	139.635	2.28412	0.340699	3.5958e-12	2.01646e-11
YNR016C	9010.12	-1.70715	0.252668	3.74108e-12	2.09602e-11
YPR066W	321.321	1.68528	0.249175	3.84548e-12	2.15256e-11
YIL121W	11712.9	1.42886	0.210019	3.92527e-12	2.19523e-11
YGR174W-A	109.312	2.80776	0.421813	3.95641e-12	2.21064e-11
YMR246W	5268.34	-1.48339	0.218967	4.15601e-12	2.32006e-11
YIL045W	548.989	1.65094	0.244436	4.23739e-12	2.36335e-11
YHR106W	1063.99	1.29653	0.190817	4.64035e-12	2.58576e-11
YKL168C	1095.95	1.32143	0.194702	4.74553e-12	2.64198e-11
YHR154W	739.325	-1.51306	0.224269	4.90874e-12	2.73038e-11
YMR077C	806.607	1.37351	0.202849	5.00087e-12	2.77912e-11
YAL056W	3769.55	1.21689	0.179167	5.13297e-12	2.84995e-11
YPR195C	306.709	1.86698	0.279125	5.45601e-12	3.02659e-11
YLR161W	72.719	3.45852	0.523655	5.51526e-12	3.0567e-11
YHR074W	3559.76	1.22619	0.180923	5.64414e-12	3.12532e-11
YML055W	831.416	-1.31946	0.195485	5.91153e-12	3.27045e-11
YOR130C	4696.27	1.99491	0.299603	5.94063e-12	3.28068e-11
YGL162W	243.152	-1.67631	0.250343	5.94068e-12	3.28068e-11
YKL197C	1524.55	1.31102	0.194065	5.96016e-12	3.28849e-11
YBR007C	1564.59	1.27839	0.189251	6.19142e-12	3.41303e-11
YAL007C	2012.87	-1.33663	0.198069	6.2566e-12	3.44588e-11
YKR005C	299.225	1.67797	0.250678	6.27525e-12	3.45307e-11
YGR182C	606.127	1.40919	0.209326	6.31328e-12	3.4709e-11
YJL069C	1838.78	-1.7714	0.265576	6.41975e-12	3.52628e-11
YLR455W	818.389	-1.43039	0.212892	6.46237e-12	3.54653e-11
YDR226W	9520.29	-1.2659	0.187952	6.51406e-12	3.57172e-11
YMR127C	389.481	-1.58443	0.236732	6.57516e-12	3.60202e-11
YLR348C	5820.36	1.2363	0.183116	6.68614e-12	3.65956e-11
YMR221C	3552.73	1.27791	0.189647	6.95608e-12	3.80393e-11
YLL061W	874.662	-2.33341	0.354274	6.98805e-12	3.81803e-11
YHR103W	1211.04	-1.3274	0.197637	7.42487e-12	4.0531e-11
YKL220C	397.551	1.51022	0.225782	7.64972e-12	4.16854e-11
YHR210C	229.709	2.06475	0.312373	7.64988e-12	4.16854e-11
YER138W-A	299.861	2.18759	0.332018	8.06848e-12	4.39276e-11
YER045C	664.279	1.41701	0.21179	8.298e-12	4.51373e-11
YKL217W	162.207	1.94535	0.294053	8.41814e-12	4.57504e-11
YKL021C	1376.08	-1.76366	0.266013	8.43136e-12	4.57819e-11
YGR208W	1860.37	-1.67556	0.252537	8.88143e-12	4.81833e-11
YHL017W	886.231	-1.44076	0.21594	8.90763e-12	4.8283e-11
YKL014C	2241.06	-1.94816	0.295484	8.97706e-12	4.86165e-11
YKR090W	678.304	-1.69823	0.256213	9.05492e-12	4.89951e-11
YMR253C	996.123	1.61246	0.242653	9.25237e-12	5.00196e-11
YBR196C	21025.6	-1.18616	0.177095	9.36192e-12	5.05675e-11
YHR081W	867.527	-1.95341	0.29656	9.43931e-12	5.09409e-11
YPL036W	865.439	1.80632	0.273176	9.50214e-12	5.12351e-11
YIL056W	3568.68	1.88889	0.286215	9.69448e-12	5.22265e-11
YPR110C	3401.32	-1.94097	0.295128	1.02384e-11	5.51087e-11
YER137C	186.425	-2.52106	0.387229	1.04522e-11	5.621e-11
YOL036W	3781.12	1.18434	0.177014	1.07227e-11	5.76145e-11
YGL180W	2073.5	2.62477	0.403416	1.07566e-11	5.7702e-11
YGL259W	77.3939	3.1365	0.482946	1.07577e-11	5.7702e-11
YHL039W	1203.16	-2.04487	0.312257	1.11298e-11	5.96459e-11
YPR114W	1631.76	-1.35346	0.203486	1.11758e-11	5.98403e-11
YML018C	2812.59	-1.90389	0.290182	1.12753e-11	6.03211e-11
YPL185W	67.5454	3.05535	0.470687	1.23073e-11	6.57848e-11
YKR021W	2203.4	1.25798	0.188984	1.24853e-11	6.66784e-11
YDR121W	516.21	-1.61784	0.245532	1.27402e-11	6.79809e-11
YMR212C	1674.02	-1.50266	0.227416	1.28177e-11	6.83305e-11
YFL041W-A	207.481	2.16524	0.331717	1.28279e-11	6.83305e-11
YDR002W	7087.71	-1.31794	0.198699	1.28707e-11	6.8499e-11
YKL129C	1451.91	1.63242	0.247853	1.34256e-11	7.13908e-11
YGR197C	1183.06	1.82197	0.277773	1.34648e-11	7.15377e-11
YBR042C	809.427	-1.36126	0.205678	1.37539e-11	7.30107e-11
YPR198W	2698.75	1.34395	0.202862	1.3996e-11	7.4232e-11
YJL101C	2172.34	-1.39696	0.211297	1.40712e-11	7.45666e-11
YHR171W	637.885	2.07125	0.317997	1.47631e-11	7.81659e-11
YBR157C	155.036	1.93025	0.295498	1.51162e-11	7.99666e-11
YPR119W	947.939	-1.67507	0.255581	1.54788e-11	8.18144e-11
YDR131C	646.833	1.35603	0.205372	1.60659e-11	8.48452e-11
YHR075C	367.968	1.4794	0.224733	1.61399e-11	8.5163e-11
YLR347C	2286.67	-1.34663	0.2044	1.71553e-11	9.0443e-11
YMR090W	1039.24	1.53629	0.234235	1.71835e-11	9.05145e-11
YNL197C	1600.15	-1.2806	0.194078	1.76781e-11	9.30405e-11
YPL086C	1425.28	-2.11665	0.327199	1.79613e-11	9.44502e-11
YJR118C	1105.64	-1.31088	0.199019	1.82381e-11	9.5824e-11
YDL031W	2599.38	-1.94862	0.300414	1.8316e-11	9.61511e-11
YMR117C	279.524	-1.78201	0.2737	1.86404e-11	9.77709e-11
YFR006W	3539.45	1.22743	0.186059	1.94742e-11	1.02057e-10
YBR243C	1137.13	-1.42327	0.217202	1.97765e-11	1.03554e-10
YLR003C	825.632	-2.02605	0.313721	2.06646e-11	1.08112e-10
YLR378C	5477.44	-1.18502	0.180086	2.17018e-11	1.13442e-10
YOL014W	415.965	-1.4688	0.224955	2.26021e-11	1.18048e-10
YEL006W	2461.13	1.17642	0.178783	2.2916e-11	1.19586e-10
YMR076C	856.235	-1.30561	0.199273	2.32316e-11	1.2113e-10
YGR110W	665.954	1.73455	0.267344	2.34567e-11	1.22201e-10
YOL016C	2508	1.75061	0.270205	2.37019e-11	1.23374e-10
YMR252C	648.456	1.33189	0.203636	2.49555e-11	1.2979e-10
YHR088W	1271.12	-2.07737	0.323471	2.52117e-11	1.31012e-10
YMR129W	2030.92	-1.29272	0.19767	2.63728e-11	1.3693e-10
YPR145C-A	74.2437	3.07954	0.48375	2.67257e-11	1.38645e-10
YPR113W	2833.7	-1.23722	0.189186	2.70249e-11	1.4008e-10
YMR287C	1265.48	1.41375	0.217028	2.74786e-11	1.42311e-10
YMR118C	55.4911	4.19126	0.658501	2.88589e-11	1.49225e-10
YMR251W-A	24957.6	1.72713	0.268804	2.8862e-11	1.49225e-10
YML118W	330.667	2.02794	0.315982	2.89934e-11	1.49704e-10
YJL103C	343.678	1.86378	0.289425	2.90032e-11	1.49704e-10
YDR281C	308.785	-1.81556	0.282472	3.10902e-11	1.60342e-10
YNL313C	2036.32	-1.83028	0.284998	3.15006e-11	1.62323e-10
YLR297W	311.635	-1.64883	0.255634	3.18275e-11	1.6387e-10
YGR229C	4021.35	-1.21973	0.187136	3.19143e-11	1.6418e-10
YDL213C	1402.09	-1.91779	0.299337	3.20033e-11	1.64501e-10
YMR154C	588.038	1.50501	0.232429	3.22687e-11	1.65726e-10
YGR244C	6235.56	1.63558	0.253531	3.29779e-11	1.69228e-10
YOR375C	47342.7	1.37845	0.212066	3.37296e-11	1.72941e-10
YIL073C	152.525	1.88186	0.293381	3.39515e-11	1.73934e-10
YMR277W	1647.93	-1.58005	0.245261	3.55069e-11	1.81752e-10
YMR238W	4903.63	1.30556	0.20088	3.5692e-11	1.82548e-10
YJR131W	1373.43	1.37284	0.211954	3.65049e-11	1.8655e-10
YDR180W	489.506	-1.51959	0.235718	3.68794e-11	1.88308e-10
snR30	208.248	-1.99349	0.312644	3.73819e-11	1.90716e-10
YBR128C	309.853	1.93696	0.303347	3.87804e-11	1.97687e-10
YHR033W	271.862	-1.90867	0.299254	3.94661e-11	2.01016e-10
YBL048W	46.936	4.32184	0.677613	4.04562e-11	2.05889e-10
YDL055C	23122.3	-1.26324	0.194558	4.15672e-11	2.11369e-10
YDL231C	4052.8	1.19568	0.184286	4.16654e-11	2.11693e-10
YJL212C	2468.24	-1.72126	0.269145	4.17755e-11	2.12078e-10
YDL043C	494.732	-1.49354	0.23224	4.1898e-11	2.12525e-10
YCR008W	1867.08	-1.3075	0.20248	4.32241e-11	2.19071e-10
YPL082C	1638.41	-1.39749	0.216954	4.34776e-11	2.20175e-10
YER185W	168.485	2.3368	0.370085	4.47126e-11	2.26243e-10
YJL210W	1445.24	1.39107	0.215902	4.50631e-11	2.27829e-10
YHR069C	1016.5	-1.93096	0.30444	4.82081e-11	2.4353e-10
YOR210W	1615.18	-1.43293	0.223533	4.97354e-11	2.5104e-10
YOL133W	1313.9	1.24173	0.192727	5.29437e-11	2.67015e-10
YPR111W	1805.85	1.6242	0.25469	5.40772e-11	2.72508e-10
YKR014C	3955.9	1.30163	0.202386	5.48047e-11	2.75949e-10
YJR039W	999.76	1.66706	0.262582	6.23823e-11	3.13847e-10
YER156C	2717.83	-1.57011	0.247314	6.66999e-11	3.3522e-10
YPR141C	540.304	-1.59516	0.251443	6.67394e-11	3.3522e-10
YFL028C	3525.05	1.56021	0.246318	6.93656e-11	3.48127e-10
YPL222W	701.524	1.55063	0.244223	7.0356e-11	3.5281e-10
YBR121C	7119.56	-1.25636	0.19703	7.06799e-11	3.54146e-10
YBR035C	6035.35	1.35252	0.212015	7.11432e-11	3.56178e-10
YHR031C	697.743	-1.39408	0.219034	7.21974e-11	3.61163e-10
YKL054C	3825.52	-1.1524	0.179714	7.38731e-11	3.69246e-10
YDR021W	565.42	-2.2273	0.357066	7.39745e-11	3.69453e-10
YGL092W	2436.02	-1.37996	0.216891	7.42663e-11	3.7061e-10
YBL085W	1587.4	-1.2496	0.195899	7.661e-11	3.81996e-10
YPR083W	1429.46	1.52683	0.240907	7.68809e-11	3.83037e-10
YMR259C	1260.32	-1.79835	0.286024	7.79196e-11	3.87898e-10
YOL143C	4311.88	-1.31091	0.206053	7.97313e-11	3.96597e-10
YGR161C-D	608.836	2.03016	0.32446	8.04137e-11	3.99669e-10
YBR104W	4306.99	1.39326	0.219312	8.0784e-11	4.01186e-10
YPR003C	1276.91	1.40096	0.220662	8.18619e-11	4.06211e-10
YNL183C	2289.27	1.61849	0.25698	8.52016e-11	4.22115e-10
YOL155C	5376.15	-2.37493	0.383318	8.52038e-11	4.22115e-10
YIL099W	116.821	2.7414	0.443201	8.63688e-11	4.27305e-10
YJL071W	2573.05	1.86181	0.296978	8.63901e-11	4.27305e-10
YER002W	2595.8	-1.5501	0.245731	8.70297e-11	4.30123e-10
YPR170C	89.3174	2.29775	0.369254	8.88878e-11	4.38955e-10
YOR161C	1055.39	-2.04736	0.328931	9.31184e-11	4.59479e-10
YAL030W	1442.25	1.41939	0.22438	9.4287e-11	4.64872e-10
YDR481C	12642.8	1.64532	0.263862	9.68526e-11	4.7714e-10
YER066W	242.845	1.64669	0.262043	9.75789e-11	4.80335e-10
YDL112W	1726.14	-1.93696	0.310858	9.80747e-11	4.8239e-10
YIL007C	629.454	1.57992	0.25134	1.02396e-10	5.03244e-10
YIL042C	1080.49	1.46053	0.231776	1.04472e-10	5.13036e-10
YBL102W	3598.3	1.3966	0.221299	1.04976e-10	5.14695e-10
YLR064W	1267.9	-1.24958	0.197347	1.04977e-10	5.14695e-10
YHL011C	2566.15	-1.91497	0.307831	1.05918e-10	5.18896e-10
YNL102W	1135.81	-1.24675	0.197146	1.10322e-10	5.40044e-10
YJL144W	544.443	2.17106	0.350926	1.11674e-10	5.4623e-10
YJL127C-B	1255.22	1.28644	0.203556	1.13078e-10	5.52657e-10
YDR289C	624.259	-1.3271	0.210599	1.17092e-10	5.71819e-10
YKL157W	5454.77	1.26461	0.20029	1.21342e-10	5.92107e-10
YPL250C	7694.72	2.34605	0.380367	1.22701e-10	5.98267e-10
YOR204W	5312.95	-1.31364	0.208925	1.28744e-10	6.27234e-10
YMR179W	592.112	-1.38098	0.220012	1.2951e-10	6.30464e-10
YJR110W	1381.2	1.30604	0.20755	1.31003e-10	6.3723e-10
YKR056W	1714.28	-1.79516	0.289304	1.31968e-10	6.41416e-10
YPL186C	312.527	1.62094	0.259885	1.35332e-10	6.57249e-10
YFL030W	437.979	2.04251	0.330836	1.36486e-10	6.62333e-10
YBR186W	45.9764	3.91456	0.637424	1.40049e-10	6.79089e-10
YKL096C-B	73.6114	2.50663	0.408303	1.4052e-10	6.80836e-10
YPL274W	5086.23	1.23145	0.195658	1.41055e-10	6.82894e-10
YNL282W	409.653	-1.66901	0.269408	1.60143e-10	7.74697e-10
YPL217C	3214.62	-2.07331	0.337919	1.63578e-10	7.90693e-10
YPR104C	1305.55	-1.25705	0.200839	1.67684e-10	8.09904e-10
YHR071W	16216.3	1.42403	0.229452	1.72277e-10	8.31435e-10
YDR492W	1768.33	-1.43231	0.230422	1.72602e-10	8.32354e-10
YGL224C	6989.9	2.06557	0.336972	1.74548e-10	8.4108e-10
YBR002C	1229.36	-1.66795	0.269991	1.77365e-10	8.53987e-10
YML027W	933.874	-1.75958	0.28548	1.78047e-10	8.56601e-10
YLL018C-A	279.798	-2.04306	0.333754	1.799e-10	8.6484e-10
YCL039W	1303.38	1.29467	0.208099	1.82562e-10	8.76952e-10
YFL010C	5071.95	1.1531	0.184501	1.84873e-10	8.87362e-10
YGR033C	1321.76	-1.22737	0.196478	1.85376e-10	8.89083e-10
YHL027W	4321.21	1.33683	0.214674	1.9272e-10	9.23586e-10
YGL007W	60.0884	3.46168	0.573513	1.97496e-10	9.45739e-10
YPL110C	1604.73	1.29744	0.2083	1.98707e-10	9.50801e-10
YMR042W	1134.87	1.39529	0.224796	2.04256e-10	9.76421e-10
YGL219C	2382.21	1.50579	0.243293	2.04378e-10	9.76421e-10
YMR291W	1307.51	-1.41921	0.229029	2.06269e-10	9.84689e-10
YBL052C	1208.07	-1.21961	0.195763	2.09684e-10	1.00022e-09
YPL123C	1143.7	2.41203	0.398904	2.15122e-10	1.02537e-09
YHL026C	316.873	-1.48346	0.240213	2.2091e-10	1.05214e-09
YBR149W	4960.68	1.66015	0.271317	2.31039e-10	1.09953e-09
YGR122C-A	112.247	1.99295	0.326805	2.3756e-10	1.12969e-09
YNL009W	408.739	1.37237	0.221893	2.42884e-10	1.15412e-09
YHR163W	4244.69	-1.19083	0.191813	2.44996e-10	1.16326e-09
YIL021W	1772.52	-1.24443	0.200771	2.47849e-10	1.1759e-09
YDL086W	3294.79	1.11819	0.179645	2.49944e-10	1.18493e-09
YMR050C	230.183	1.95338	0.320831	2.51603e-10	1.19187e-09
YCR044C	896.081	-1.35342	0.219182	2.55471e-10	1.20927e-09
YOR098C	2324.53	-1.44719	0.235065	2.57602e-10	1.21842e-09
YNR056C	164.669	1.93583	0.318037	2.61228e-10	1.23462e-09
YBR015C	3570.95	-1.10758	0.178274	2.61895e-10	1.23683e-09
YJR117W	2251.16	-1.11859	0.180185	2.6941e-10	1.27134e-09
YKL125W	924.923	-1.48973	0.242565	2.71094e-10	1.27831e-09
YDL167C	2070.65	-1.8864	0.310533	2.72965e-10	1.28615e-09
YIL088C	6866.85	1.25785	0.203929	2.73803e-10	1.28911e-09
YNL024C	97.7482	-2.14733	0.355194	2.77401e-10	1.3037e-09
YJL186W	1993.65	-1.28147	0.20757	2.77525e-10	1.3037e-09
YPL019C	3944.39	-1.08406	0.174612	2.77614e-10	1.3037e-09
YPL006W	2622.12	1.20529	0.194626	2.77749e-10	1.3037e-09
YDL032W	41.5534	4.35562	0.715166	2.91892e-10	1.36905e-09
YGL140C	5242.14	1.23077	0.199157	2.92309e-10	1.36996e-09
YBR256C	12823.7	1.77351	0.29121	2.92875e-10	1.37157e-09
YBL032W	1944.58	-1.1453	0.185046	2.93169e-10	1.3719e-09
YIR026C	878.477	-2.35047	0.391758	2.9521e-10	1.38041e-09
YHR044C	448.018	1.36078	0.221059	2.95484e-10	1.38064e-09
YBR109C	6674.82	1.14555	0.184979	2.97382e-10	1.38816e-09
YAL015C	1017.17	1.21644	0.196866	2.97542e-10	1.38816e-09
YLL059C	139.472	1.86391	0.30678	2.98176e-10	1.39006e-09
YKR082W	1519.08	-1.46683	0.239333	3.0049e-10	1.39979e-09
YNL121C	3831.93	-1.10735	0.178932	3.04659e-10	1.41814e-09
YDL138W	1706.71	1.27468	0.206873	3.12499e-10	1.45353e-09
tF(GAA)D	45.0966	3.88024	0.646021	3.13605e-10	1.45758e-09
YLR080W	391.726	1.82248	0.300254	3.18454e-10	1.479e-09
YNL104C	57099.5	1.67975	0.273016	3.19122e-10	1.48099e-09
YBR205W	1218.02	-1.16262	0.188568	3.36068e-10	1.55845e-09
YNL273W	537.577	-1.31108	0.213547	3.38165e-10	1.567e-09
YBR012W-B	245.283	1.98545	0.329558	3.54779e-10	1.64275e-09
YLR362W	1211.94	1.14785	0.186259	3.57549e-10	1.65433e-09
YPL256C	1184.81	-1.53148	0.251663	3.68165e-10	1.70218e-09
YOR238W	971.666	1.44876	0.237433	3.71009e-10	1.71404e-09
YKL182W	10871	-1.56067	0.257192	3.74475e-10	1.72876e-09
YGL045W	684.211	1.27145	0.207335	3.76453e-10	1.73659e-09
YOR260W	2440.72	-1.54028	0.253381	3.7875e-10	1.74501e-09
YBR271W	896.861	-1.80269	0.298765	3.78846e-10	1.74501e-09
YJR007W	3194.51	-1.24613	0.203778	3.79844e-10	1.74831e-09
YHR147C	586.997	-1.26376	0.206285	3.84969e-10	1.77057e-09
YKL165C	1323.71	-1.17786	0.19196	3.99034e-10	1.83389e-09
YNL014W	508.508	1.36581	0.223771	4.06965e-10	1.86895e-09
YBR233W-A	349.644	-1.60832	0.265793	4.22656e-10	1.93956e-09
YKL006C-A	610.016	-1.33463	0.218976	4.27168e-10	1.9577e-09
YHR119W	1203.66	-1.28541	0.210576	4.27245e-10	1.9577e-09
YMR149W	2471.01	-1.12106	0.18283	4.3299e-10	1.98255e-09
YPL239W	1534.36	-1.76476	0.293361	4.39573e-10	2.0112e-09
YPL071C	955.95	1.17264	0.191555	4.5186e-10	2.06588e-09
YKL004W	2618.51	-1.60131	0.265137	4.54466e-10	2.07626e-09
YPL210C	2422.69	-1.24057	0.20332	4.56862e-10	2.08566e-09
YOL123W	3035.55	-1.1831	0.194658	4.63554e-10	2.11464e-09
YHR175W	1962.68	1.29141	0.212171	4.89264e-10	2.23028e-09
YJL147C	640.742	1.24229	0.203824	4.90743e-10	2.23536e-09
YDL065C	1065.34	-1.18161	0.193727	4.96373e-10	2.25934e-09
YDR297W	1812.7	-1.40529	0.231988	5.00717e-10	2.27743e-09
YJL123C	2371.97	-1.27815	0.210263	5.09301e-10	2.31477e-09
YIL028W	187.81	1.64098	0.272714	5.29371e-10	2.40421e-09
YIL166C	156.523	1.7323	0.28861	5.33876e-10	2.42289e-09
YDR502C	11036.8	-1.86304	0.311656	5.40494e-10	2.45112e-09
YLR051C	1146.31	-1.527	0.253621	5.48277e-10	2.48458e-09
YNL097C	518.599	-1.29469	0.213569	5.53444e-10	2.50615e-09
YGL053W	674.254	1.50171	0.24894	5.56691e-10	2.51901e-09
YMR014W	1712.83	-1.77365	0.297083	5.77771e-10	2.61247e-09
YNL001W	909.56	-1.48095	0.246111	5.87373e-10	2.65394e-09
YNL113W	1823.05	-1.69514	0.283485	5.93747e-10	2.68078e-09
YOR045W	1225.81	-1.20473	0.198909	6.24387e-10	2.81705e-09
YPR125W	1401.22	-1.15145	0.190022	6.44397e-10	2.90521e-09
YDL159W	969.199	1.29755	0.214805	6.46075e-10	2.91064e-09
YJL110C	1943.64	1.21413	0.200523	6.49564e-10	2.92423e-09
YHR127W	623.008	-1.33757	0.221984	6.60852e-10	2.97287e-09
YKL061W	546.312	1.40841	0.234028	6.61924e-10	2.97552e-09
YOL101C	124.722	-1.84404	0.310461	6.76157e-10	3.03729e-09
YER087C-B	1935.14	-1.09509	0.180638	6.87506e-10	3.08602e-09
YGL070C	785.146	-1.28601	0.213443	6.93045e-10	3.10861e-09
YDL230W	918.222	1.52957	0.255438	6.96855e-10	3.12343e-09
YPR007C	49.5789	2.99654	0.511029	7.01361e-10	3.14134e-09
YDL143W	4713.37	-1.11651	0.184591	7.29714e-10	3.26596e-09
YIL149C	2165.88	-1.23498	0.20517	7.50771e-10	3.35777e-09
YCR107W	835.047	1.22739	0.203755	7.73314e-10	3.45608e-09
YAL053W	4396.22	1.11403	0.184484	8.05568e-10	3.59762e-09
YGL039W	1377.14	1.12303	0.186062	8.07155e-10	3.6021e-09
YBR250W	174.326	1.96237	0.332674	8.09213e-10	3.60867e-09
YPL163C	2348.09	-1.63337	0.275085	8.14507e-10	3.62965e-09
YPR002W	2990.65	2.43355	0.417587	8.40295e-10	3.74186e-09
YGL200C	4248.54	-1.19977	0.199708	8.4096e-10	3.74212e-09
YDL232W	920.279	-1.1858	0.197249	8.52161e-10	3.78923e-09
YEL037C	3335.12	-1.0856	0.180152	8.58266e-10	3.81362e-09
YCL052C	1509.63	1.17229	0.194924	8.76392e-10	3.89136e-09
YPL171C	102.293	1.99511	0.339048	8.88312e-10	3.94145e-09
YJL118W	279.988	-1.46293	0.245657	8.9012e-10	3.94663e-09
YPL257W	340.526	1.40044	0.234732	9.16438e-10	4.06039e-09
YPL194W	730.414	1.28598	0.214814	9.17305e-10	4.06131e-09
YHR084W	536.684	-1.36114	0.228337	9.5466e-10	4.22367e-09
YMR203W	3260.52	-1.10594	0.184213	9.75254e-10	4.31168e-09
YHL007C	2886.2	-1.34643	0.225948	9.78153e-10	4.3214e-09
YNL092W	193.804	2.11949	0.362729	9.95665e-10	4.39562e-09
YDL140C	4862.01	-1.10428	0.184069	1.00341e-09	4.42666e-09
YLR420W	3405.45	-1.42749	0.240419	1.0145e-09	4.47235e-09
YHR161C	4092.25	1.81342	0.308443	1.0197e-09	4.49206e-09
YKL211C	11496.6	1.78243	0.303039	1.03042e-09	4.53604e-09
YPL070W	1323.07	1.31753	0.221017	1.03118e-09	4.53616e-09
YDR155C	3300.36	-1.43195	0.241486	1.07242e-09	4.71421e-09
YPR120C	461.01	-1.35658	0.228328	1.08458e-09	4.76429e-09
YOR377W	1089.24	1.24947	0.209774	1.09485e-09	4.80594e-09
YDL035C	3447.9	1.28673	0.216352	1.10694e-09	4.85556e-09
YOR021C	1775.81	-1.68735	0.287084	1.10817e-09	4.85752e-09
YNL147W	800.754	-1.36452	0.229984	1.13027e-09	4.95084e-09
YDR339C	927.414	-1.37839	0.232528	1.14514e-09	5.01244e-09
YEL067C	237.042	1.84501	0.315095	1.15869e-09	5.06816e-09
YJR076C	1951.19	-1.19806	0.201087	1.16548e-09	5.09421e-09
YMR015C	2793.11	-1.10648	0.185781	1.195e-09	5.21954e-09
YML074C	4490.01	-1.12713	0.188904	1.19601e-09	5.22027e-09
YIL097W	545.762	1.59422	0.270747	1.20245e-09	5.24465e-09
YLR023C	3434.24	1.21769	0.204586	1.23322e-09	5.37506e-09
YGR066C	64.5192	2.6706	0.462958	1.23648e-09	5.38263e-09
YCR098C	168.056	1.704	0.290438	1.2367e-09	5.38263e-09
YGR125W	4084.75	1.18712	0.199396	1.25609e-09	5.46314e-09
YIL087C	505.258	1.62377	0.276482	1.26977e-09	5.51877e-09
YLL062C	299.09	-1.83827	0.315407	1.30053e-09	5.64846e-09
YKL051W	1350.73	-1.36304	0.230679	1.31039e-09	5.68729e-09
YDL130W-A	1209.5	2.06634	0.356836	1.37541e-09	5.96528e-09
YKL133C	497.957	1.40202	0.237922	1.43291e-09	6.21027e-09
YMR006C	710.206	-1.44155	0.245296	1.45639e-09	6.30763e-09
YDL047W	2234.84	-1.17502	0.198343	1.47977e-09	6.40438e-09
YMR262W	1055	1.81659	0.312589	1.51863e-09	6.56794e-09
YBR018C	116.901	1.87192	0.322239	1.53259e-09	6.62368e-09
YDR284C	3282.55	1.42669	0.242924	1.57223e-09	6.7861e-09
YKR095W-A	420.689	-1.29032	0.218983	1.57238e-09	6.7861e-09
YPL264C	2274.77	2.40131	0.420107	1.60823e-09	6.936e-09
YLR103C	399.897	-1.36137	0.231871	1.65046e-09	7.11312e-09
YNL115C	2144.75	1.5697	0.268709	1.65614e-09	7.13265e-09
YOR104W	606.183	1.28919	0.218984	1.68431e-09	7.24887e-09
YCR106W	1001.12	1.40304	0.239254	1.69216e-09	7.27758e-09
YEL040W	11145.9	-1.34145	0.228636	1.72462e-09	7.41201e-09
YEL007W	1395.98	-1.53073	0.262589	1.74616e-09	7.49935e-09
YDR444W	788.542	-1.37417	0.234576	1.76031e-09	7.55488e-09
YOR145C	2993.72	-1.70233	0.293854	1.81247e-09	7.7733e-09
YGR210C	2013.77	-1.18713	0.201661	1.81846e-09	7.7936e-09
YPR006C	388.316	1.35801	0.231796	1.85564e-09	7.94739e-09
YHR111W	1521.05	1.20799	0.205284	1.85789e-09	7.95153e-09
YGR098C	758.982	-1.44185	0.247043	1.86207e-09	7.96387e-09
YBL103C	2605.79	1.43516	0.246461	1.91421e-09	8.18118e-09
YOR080W	1337.47	1.12568	0.19101	1.92359e-09	8.21556e-09
YIR021W	463.459	-1.24995	0.213248	1.98049e-09	8.45275e-09
YBR006W	2228.93	2.13303	0.373158	2.02501e-09	8.63677e-09
YDR302W	714.836	-1.17236	0.199653	2.02678e-09	8.63832e-09
YAR002W	1288.73	-1.25717	0.214776	2.05067e-09	8.73414e-09
YOR036W	1385.64	1.77882	0.308633	2.0959e-09	8.92062e-09
YLR435W	951.022	-1.72621	0.29952	2.11556e-09	8.99806e-09
YER113C	1126.44	-1.25225	0.214147	2.14281e-09	9.10151e-09
YPL068C	266.991	-1.92692	0.336324	2.14283e-09	9.10151e-09
YLR364W	498.233	-1.83065	0.318769	2.1562e-09	9.15199e-09
YML109W	611.56	-1.19513	0.204284	2.24388e-09	9.51756e-09
YIL061C	907.287	1.41985	0.244289	2.27452e-09	9.64089e-09
YGR121C	3206.58	1.17844	0.201286	2.29961e-09	9.74055e-09
YOR383C	757.783	1.2281	0.210252	2.31494e-09	9.79873e-09
YFR023W	45.6461	3.58965	0.636318	2.37645e-09	1.00522e-08
YOR001W	1719.79	-1.71979	0.299668	2.4295e-09	1.02696e-08
YMR125W	2272.01	-1.22782	0.210855	2.49393e-09	1.05347e-08
YOL164W	1215.36	1.26901	0.218008	2.56279e-09	1.08182e-08
YDL104C	542.132	1.3356	0.230123	2.5919e-09	1.09335e-08
YNL283C	1763.2	-1.23006	0.21139	2.60798e-09	1.09938e-08
YOR047C	1684.05	-1.11959	0.191999	2.73749e-09	1.15319e-08
snR33	266.397	-1.53027	0.265907	2.74602e-09	1.15599e-08
YKL029C	7588.59	-1.55508	0.2708	2.777e-09	1.16823e-08
YBR067C	2195.38	-1.07652	0.184484	2.79267e-09	1.17402e-08
YMR003W	320.979	-1.60709	0.280177	2.83896e-09	1.19267e-08
YPL132W	429.364	-1.28001	0.220922	2.87393e-09	1.20654e-08
YBR169C	962.925	1.50399	0.261424	2.94511e-09	1.23558e-08
YPL240C	3284.83	-1.82036	0.31985	3.0158e-09	1.26419e-08
YNL093W	37.5635	4.19014	0.73729	3.01739e-09	1.26419e-08
YJL132W	417.893	1.45391	0.252578	3.06546e-09	1.28345e-08
YEL068C	700.201	1.18632	0.204432	3.09855e-09	1.29643e-08
YDR073W	654.954	-1.16145	0.200229	3.11834e-09	1.30382e-08
YDR178W	1817.99	1.4442	0.251152	3.17916e-09	1.32835e-08
YBR222C	1916.66	1.09156	0.187974	3.32606e-09	1.38879e-08
YLR191W	1207.88	1.22111	0.211192	3.38208e-09	1.41122e-08
YGR267C	7344.49	1.1347	0.195669	3.41243e-09	1.42292e-08
YNL055C	18290.7	1.27278	0.220814	3.44019e-09	1.43353e-08
YNL156C	3152.34	1.12978	0.194975	3.47584e-09	1.44741e-08
YHR199C	2037.96	1.0566	0.182005	3.53348e-09	1.47041e-08
YER032W	820.389	-1.27764	0.221983	3.58244e-09	1.48978e-08
YCR024C-B	5595.32	-1.18989	0.206143	3.59551e-09	1.49421e-08
YMR323W	36.6989	4.15066	0.734993	3.64892e-09	1.51539e-08
YMR214W	1756.09	-1.17101	0.202965	3.69817e-09	1.5348e-08
YIL017C	1160.84	1.31329	0.228432	3.70733e-09	1.53757e-08
YHR172W	456.28	-1.3643	0.237939	3.72521e-09	1.54395e-08
YLR243W	647.934	-1.44948	0.253859	3.8911e-09	1.61161e-08
YGR177C	271.629	-1.73507	0.306798	3.96555e-09	1.64135e-08
YHL042W	110.087	1.84524	0.326687	4.02415e-09	1.66449e-08
YPR020W	1091.86	1.0853	0.188026	4.07251e-09	1.68336e-08
YDL182W	33727.4	-1.52028	0.26737	4.10796e-09	1.69687e-08
YOL007C	1446.23	-1.12697	0.195615	4.12738e-09	1.70375e-08
YLR062C	35.0609	-4.98747	0.883797	4.1515e-09	1.71256e-08
YOR041C	65.6047	2.3906	0.428333	4.16415e-09	1.71663e-08
YDL234C	1462.44	1.24285	0.216427	4.18012e-09	1.72206e-08
YHR077C	2128.36	-1.31392	0.229594	4.18601e-09	1.72334e-08
YGR088W	670.527	1.87047	0.332923	4.31813e-09	1.77654e-08
YLR354C	13793.2	-1.06903	0.185792	4.33462e-09	1.78214e-08
YER115C	696.397	-1.35459	0.237428	4.43191e-09	1.82092e-08
YNL154C	3743.72	-1.00742	0.175055	4.45193e-09	1.82793e-08
YMR316W	885.464	1.1691	0.203531	4.45881e-09	1.82954e-08
YDR322C-A	2555.36	1.1481	0.199751	4.52291e-09	1.8546e-08
YHR098C	2150.91	-1.1452	0.199435	4.54722e-09	1.86333e-08
YER007C-A	1571.83	-1.25473	0.219324	4.55197e-09	1.86404e-08
YLR045C	1191.6	-1.27828	0.223712	4.59767e-09	1.8815e-08
YGL101W	919.155	-1.2059	0.210732	4.78489e-09	1.95682e-08
YNR021W	4471.52	-1.01937	0.177221	4.89414e-09	2.00017e-08
YPL148C	338.709	1.3268	0.232846	4.91431e-09	2.00709e-08
YNL312W	1244.48	-1.08822	0.189778	5.04935e-09	2.06087e-08
YGR054W	3437.29	-1.04154	0.181986	5.15075e-09	2.10086e-08
YCR023C	4344.9	1.35463	0.238455	5.16251e-09	2.10427e-08
YHR018C	75388.6	2.09059	0.375864	5.18617e-09	2.11251e-08
YKR105C	37.9837	3.6146	0.65243	5.20661e-09	2.11944e-08
YLR299W	5912.48	1.97268	0.355677	5.55446e-09	2.25955e-08
YMR018W	131.426	1.75646	0.313439	5.57349e-09	2.26579e-08
YFL031W	7187.88	-1.0608	0.184926	5.65338e-09	2.29675e-08
YBL068W	1041.73	-1.18544	0.208168	5.71228e-09	2.31916e-08
YJL002C	5000.05	-1.02055	0.1783	5.76743e-09	2.34e-08
YKL065C	4250.31	1.32943	0.234417	5.77321e-09	2.34081e-08
YDL243C	358.065	1.32031	0.232772	5.7786e-09	2.34145e-08
YHL013C	693.937	-1.23486	0.217495	5.9689e-09	2.41697e-08
YDR225W	15841.7	-1.38638	0.247222	6.48477e-09	2.62414e-08
YHR100C	869.88	1.3026	0.230343	6.49776e-09	2.62767e-08
YDR525W-A	1649.9	1.30489	0.23081	6.57533e-09	2.6573e-08
YGL117W	7632.97	2.18471	0.397534	6.58733e-09	2.6604e-08
YGR203W	686.324	1.15844	0.204163	6.80894e-09	2.7481e-08
YLR018C	814.533	-1.34916	0.239553	6.8165e-09	2.74935e-08
YDR014W-A	54.2189	2.55795	0.466251	6.87857e-09	2.77257e-08
YNL036W	8394.64	2.53868	0.46349	6.98602e-09	2.81404e-08
YNL063W	745.569	1.13583	0.200315	7.15506e-09	2.88025e-08
YKR085C	639.652	-1.2254	0.217135	7.37929e-09	2.96711e-08
YDR051C	747.796	-1.11243	0.196367	7.38046e-09	2.96711e-08
YNL162W-A	186.031	-2.39263	0.439308	7.464e-09	2.99874e-08
YJL158C	5875.04	-1.30901	0.232978	7.74924e-09	3.11131e-08
YER016W	885.534	-1.37	0.244432	7.82629e-09	3.1402e-08
YDR266C	1278.51	-1.12333	0.199451	7.97402e-09	3.19739e-08
YHR063C	3819.17	1.13199	0.200301	8.03948e-09	3.22154e-08
YGL195W	4254.94	-1.18363	0.210763	8.06987e-09	3.23162e-08
YFL004W	6362.44	1.00446	0.177048	8.10268e-09	3.24265e-08
YIL038C	1849.76	-1.21089	0.215126	8.13191e-09	3.25224e-08
YJL163C	561.868	1.9035	0.345787	8.1403e-09	3.25348e-08
YDR367W	806.034	-1.15883	0.205545	8.20713e-09	3.27807e-08
YML061C	933.226	-1.1015	0.195081	8.31486e-09	3.31894e-08
YJL159W	37836.7	0.998369	0.176049	8.33554e-09	3.32504e-08
YDR309C	1896.86	1.02982	0.181957	8.52904e-09	3.40003e-08
YIL029C	395.422	1.27469	0.227114	8.5962e-09	3.42421e-08
YGL063W	450.085	-1.41634	0.25385	8.6008e-09	3.42421e-08
YOL104C	151.381	2.90382	0.540972	8.74788e-09	3.48052e-08
YJR064W	3629.41	-1.1868	0.211195	8.80134e-09	3.49953e-08
YEL061C	1266.46	-1.17473	0.209115	9.01751e-09	3.58316e-08
YFL036W	1293.49	-1.21665	0.216902	9.05829e-09	3.59705e-08
YAL012W	6771.34	-1.27051	0.226937	9.15089e-09	3.63148e-08
YMR092C	3137.13	1.07661	0.191169	9.53493e-09	3.78145e-08
YOR370C	3830.47	-1.0694	0.190026	9.58938e-09	3.8006e-08
YGR256W	90.7561	2.27919	0.41924	9.61591e-09	3.80867e-08
YDR262W	2281.57	1.16086	0.206864	9.7638e-09	3.86476e-08
YER177W	15659.3	-1.25089	0.223728	9.87228e-09	3.90519e-08
YPL235W	1912.26	-1.14387	0.204115	1.0118e-08	3.99982e-08
YBR244W	2067.85	-1.05612	0.187905	1.01437e-08	4.0074e-08
YPL119C-A	93.0938	2.04565	0.375155	1.01574e-08	4.01027e-08
YER040W	2317.67	1.40453	0.253351	1.01829e-08	4.01775e-08
YEL028W	230.394	1.49088	0.269338	1.05479e-08	4.15909e-08
YDR223W	163.813	1.67287	0.303981	1.071e-08	4.22032e-08
YBR287W	4226.62	1.1426	0.204316	1.08667e-08	4.27932e-08
YKL107W	45.5047	3.23231	0.60126	1.10295e-08	4.34066e-08
YAL067C	365.445	1.25885	0.225996	1.11406e-08	4.38133e-08
YBL016W	74.2372	2.77999	0.5181	1.1147e-08	4.38133e-08
YLR339C	28.6342	-4.12071	0.76249	1.19425e-08	4.69097e-08
YDR259C	163.504	1.57422	0.286343	1.21418e-08	4.76622e-08
snR18	57.4167	-2.46764	0.46041	1.27003e-08	4.98229e-08
YDL084W	8959.5	-0.969356	0.174259	1.27619e-08	5.00327e-08
YHR050W	1762.34	-1.00617	0.18009	1.29588e-08	5.07721e-08
YJR029W	103.74	1.80214	0.330689	1.29669e-08	5.07721e-08
YPL244C	1529.71	-1.06164	0.190409	1.30815e-08	5.11879e-08
YJL207C	1382.99	-1.17385	0.211385	1.31347e-08	5.13637e-08
YPL101W	1242.26	-1.12468	0.202243	1.32296e-08	5.17022e-08
YPL193W	659.383	-1.68567	0.309375	1.34371e-08	5.24797e-08
YDR280W	1367.49	-1.23751	0.22358	1.35288e-08	5.28045e-08
YJR048W	1035.25	-1.36808	0.248376	1.36226e-08	5.31227e-08
YHR017W	988.95	1.10836	0.199193	1.36276e-08	5.31227e-08
YAL054C	365.358	1.27526	0.230532	1.36381e-08	5.313e-08
YGL139W	1553.07	-1.1169	0.201111	1.38816e-08	5.40445e-08
YOR192C	433.195	1.40413	0.25517	1.40001e-08	5.44714e-08
YMR263W	550.309	-1.26471	0.228949	1.40128e-08	5.44862e-08
YCL050C	3448.84	-0.975075	0.174783	1.40428e-08	5.45685e-08
YDL145C	4910.64	-0.963603	0.172679	1.41005e-08	5.47583e-08
snR17b	29.0773	-4.39517	0.815254	1.41569e-08	5.49427e-08
YBR060C	835.757	-1.25196	0.226702	1.42914e-08	5.54296e-08
YCR020C-A	941.756	1.16026	0.209206	1.44738e-08	5.61021e-08
YDL192W	8639.95	-0.988291	0.17731	1.48021e-08	5.73382e-08
YOR301W	676.264	-1.11624	0.201576	1.52023e-08	5.88516e-08
YIL156W	1385.28	1.08596	0.19562	1.52345e-08	5.89394e-08
YNL234W	468.75	-1.27994	0.2325	1.53062e-08	5.91796e-08
snR4	199.719	-1.46413	0.267667	1.53204e-08	5.91974e-08
YOR305W	685.153	-1.17728	0.213148	1.54859e-08	5.97994e-08
YPR098C	1212.98	1.17897	0.213313	1.55821e-08	6.01331e-08
YBR293W	996.911	1.38725	0.252985	1.57045e-08	6.05675e-08
YKL141W	3282.8	1.18678	0.214867	1.57574e-08	6.07301e-08
YNL295W	924.259	1.09405	0.197439	1.57664e-08	6.07301e-08
YOR291W	854.941	-1.11748	0.202042	1.588e-08	6.11296e-08
YHR064C	6765.39	-1.39665	0.255208	1.60365e-08	6.16935e-08
YPL002C	1009.19	1.09997	0.198815	1.64145e-08	6.30945e-08
YMR069W	50.6397	-2.81254	0.532463	1.64212e-08	6.30945e-08
YEL034C-A	113.62	-1.98378	0.369919	1.68083e-08	6.45418e-08
YBR272C	863.682	1.2167	0.221034	1.69651e-08	6.51032e-08
YJR105W	7492.32	-1.06369	0.192529	1.72277e-08	6.607e-08
YOR085W	2675.5	-0.978568	0.17674	1.75598e-08	6.73017e-08
YJL008C	4062.49	-1.02258	0.184941	1.75713e-08	6.73038e-08
YDR448W	405.002	-1.19511	0.217449	1.78666e-08	6.83925e-08
YGR195W	952.181	-1.414	0.259464	1.79463e-08	6.8655e-08
YDR377W	3012.16	1.05353	0.190603	1.8565e-08	7.09775e-08
YJR092W	1261.82	-1.31421	0.240541	1.86092e-08	7.11027e-08
YOR120W	945.539	1.4458	0.265949	1.93205e-08	7.37745e-08
YFR022W	661.511	1.14785	0.208909	1.93611e-08	7.3884e-08
YAL049C	1143.29	1.08032	0.196158	1.93944e-08	7.39652e-08
YOL012C	1247.96	-1.24424	0.227497	1.95021e-08	7.43298e-08
YGL097W	2254.15	-1.12634	0.20541	2.06382e-08	7.86116e-08
YBR130C	1211.79	-1.02054	0.185534	2.07231e-08	7.88849e-08
snR54	32.1898	-3.86636	0.736687	2.07356e-08	7.88849e-08
YML099C	2537.16	1.05646	0.192188	2.10365e-08	7.99802e-08
YFL034C-B	695.572	-1.10672	0.201932	2.13792e-08	8.1233e-08
YGL099W	1661.37	-1.51965	0.281883	2.21185e-08	8.39903e-08
YNR046W	893.245	-1.50625	0.279262	2.21532e-08	8.40703e-08
YGR174C	984.038	1.17312	0.214552	2.24428e-08	8.51169e-08
YJL092W	1071.74	-1.21522	0.223374	2.37218e-08	8.99122e-08
YDR358W	611.133	1.46108	0.271087	2.46871e-08	9.35134e-08
YLR272C	729.518	-1.11022	0.203695	2.5049e-08	9.4826e-08
YCR104W	54.0008	2.94869	0.565359	2.52449e-08	9.5509e-08
YOR243C	2229.08	-1.62904	0.304779	2.52692e-08	9.55424e-08
YOL059W	6113.27	-0.941737	0.171884	2.56966e-08	9.70987e-08
YGR268C	873.799	1.17619	0.216304	2.58063e-08	9.74534e-08
YOR084W	455.571	-1.60908	0.301086	2.6171e-08	9.87703e-08
YPR063C	2174.42	-1.04467	0.191466	2.62186e-08	9.88893e-08
YIR018W	841.256	1.05729	0.193827	2.69858e-08	1.01664e-07
YOR044W	1057.96	1.21766	0.224602	2.69874e-08	1.01664e-07
YEL029C	1544.78	1.21407	0.224255	2.82867e-08	1.06494e-07
YOL113W	1255.75	1.05261	0.193464	2.90251e-08	1.09207e-07
YMR001C	1370.47	-1.0865	0.200161	2.93101e-08	1.10212e-07
YOR160W	1027.71	-1.21956	0.225798	2.93313e-08	1.10225e-07
YLR259C	7249.25	-1.14664	0.211711	2.97871e-08	1.1187e-07
YHL004W	1205.51	-1.0352	0.190711	3.10395e-08	1.16502e-07
YHR194W	1180.84	1.15996	0.214577	3.1475e-08	1.18065e-07
YDR265W	955.284	1.09767	0.202662	3.17441e-08	1.19002e-07
YDR364C	884.33	-1.23711	0.22999	3.25365e-08	1.21898e-07
YCL011C	4602.72	-1.04133	0.192309	3.28227e-08	1.22896e-07
YBL082C	764.244	-1.30267	0.242887	3.29582e-08	1.23328e-07
YBR265W	1556.26	-1.13121	0.209767	3.30573e-08	1.23624e-07
YOR364W	86.8894	1.8811	0.357383	3.39832e-08	1.27009e-07
YDR395W	2964.71	-1.33929	0.250364	3.40772e-08	1.27284e-07
YPR160W	598.776	2.57629	0.499857	3.49676e-08	1.3053e-07
YPL128C	802.732	-1.17754	0.219021	3.52845e-08	1.31633e-07
YPR201W	136.548	1.65007	0.312184	3.62319e-08	1.35086e-07
YJL141C	1295.26	1.03661	0.191858	3.64815e-08	1.35934e-07
YCL043C	10744.1	-1.14614	0.213424	3.72839e-08	1.3884e-07
YPR181C	4305.12	-0.984527	0.182326	3.79339e-08	1.41175e-07
YPL105C	3400.7	-0.950543	0.176522	3.81564e-08	1.41918e-07
YOR142W	7680.03	1.36783	0.257519	3.91544e-08	1.45542e-07
YMR102C	1329.48	-1.02703	0.190622	3.91895e-08	1.45585e-07
YHR051W	2312.14	1.04552	0.193843	3.93063e-08	1.45931e-07
YJR144W	1229.24	-1.0695	0.198854	3.93947e-08	1.46171e-07
YHR099W	1902.92	-1.13597	0.211868	4.00393e-08	1.48473e-07
YCR091W	452.222	1.26589	0.237235	4.1682e-08	1.54471e-07
YBR005W	942.266	1.06904	0.19924	4.33909e-08	1.60708e-07
YPL113C	176.78	1.74049	0.332438	4.37366e-08	1.61891e-07
YJL022W	40.3885	3.25635	0.636607	4.39535e-08	1.62596e-07
YIL070C	708.264	-1.18952	0.223157	4.39829e-08	1.62607e-07
YGL094C	1401.66	-0.997111	0.185711	4.4832e-08	1.65647e-07
YNL041C	1981.86	1.03637	0.1932	4.53397e-08	1.67423e-07
YPL144W	357.629	-1.24807	0.234826	4.59695e-08	1.69647e-07
YPL252C	2784.17	1.16181	0.217669	4.60638e-08	1.69893e-07
YER079W	846.109	1.96535	0.379214	4.61228e-08	1.70009e-07
YOR173W	435.73	2.28778	0.44594	4.68662e-08	1.72646e-07
YAL048C	1182.01	1.33946	0.252904	4.71041e-08	1.73419e-07
YPL236C	781.655	1.10117	0.206111	4.75534e-08	1.74968e-07
YBR094W	737.409	-1.16836	0.219512	4.80142e-08	1.76558e-07
YGR213C	38.9664	3.07326	0.602963	4.93641e-08	1.81414e-07
YNR003C	769.463	-1.6761	0.321624	4.94634e-08	1.8167e-07
YHR162W	28721.5	1.32882	0.251709	4.95661e-08	1.81939e-07
YGL026C	17722.6	1.09242	0.204824	5.04957e-08	1.85241e-07
YPL009C	2927.18	-1.02219	0.191813	5.05388e-08	1.85289e-07
YJL201W	1687.52	1.10454	0.207448	5.23962e-08	1.91985e-07
snR128	25.9592	-4.52658	0.872906	5.24465e-08	1.92054e-07
YIL142W	3836.78	-0.963637	0.180479	5.27259e-08	1.92963e-07
YBR019C	43.9754	2.61716	0.513219	5.56259e-08	2.03455e-07
YDL059C	1087.57	1.00396	0.188287	5.59423e-08	2.04491e-07
YPR074C	18147.4	-0.980791	0.184033	5.62966e-08	2.05664e-07
YFR034W-A	378.888	-1.26678	0.240425	5.78111e-08	2.11072e-07
YKL191W	1553.64	-1.52552	0.292905	5.87155e-08	2.14247e-07
YOL083W	293.765	1.96604	0.382728	5.92076e-08	2.15915e-07
YGR135W	3471.11	-0.960312	0.180392	5.98118e-08	2.17989e-07
YLR211C	1133.29	1.28389	0.243959	6.0205e-08	2.19293e-07
YNR028W	1003.03	-1.07373	0.20266	6.05716e-08	2.20498e-07
YFL054C	481.474	1.27764	0.242787	6.07891e-08	2.21159e-07
YIL102C-A	404.207	1.35415	0.258343	6.20521e-08	2.25609e-07
YNR038W	1194.26	-1.42738	0.273392	6.20856e-08	2.25609e-07
YNL228W	54.0662	2.30771	0.452649	6.21855e-08	2.25839e-07
YPL157W	805.269	-1.31122	0.250627	6.68993e-08	2.42815e-07
YFR037C	3909.93	-0.959575	0.181129	6.77392e-08	2.45719e-07
YDR058C	523.648	1.11839	0.212112	6.84859e-08	2.48282e-07
YOR252W	868.563	-1.55535	0.300575	6.86681e-08	2.48796e-07
YBL002W	12286	-1.40072	0.269277	7.06346e-08	2.5577e-07
YLL047W	29.7503	4.37999	0.849318	7.20352e-08	2.60689e-07
YDL093W	892.173	-1.03651	0.196498	7.21281e-08	2.60872e-07
YMR193C-A	36.0313	-3.01245	0.602271	7.30806e-08	2.64162e-07
YDR261C-D	354.106	1.39478	0.268064	7.34341e-08	2.65284e-07
YJL072C	1242.44	1.38689	0.266548	7.43842e-08	2.68559e-07
YLR290C	1377.01	1.49177	0.288209	7.62648e-08	2.75037e-07
YOL094C	585.817	-1.06667	0.202834	7.62678e-08	2.75037e-07
YNL232W	1237.41	-1.19359	0.228493	7.85868e-08	2.83234e-07
YHR143W-A	1516.62	-1.32672	0.255205	7.95396e-08	2.86501e-07
YLL022C	728.266	-1.08941	0.207836	8.14381e-08	2.9307e-07
YER152C	2556.49	1.03605	0.197032	8.14585e-08	2.9307e-07
YDL198C	26644.5	1.54146	0.299085	8.15848e-08	2.93353e-07
YNL226W	41.8225	3.17215	0.636653	8.1882e-08	2.9425e-07
YDR369C	551.639	1.10207	0.210238	8.21218e-08	2.9494e-07
YIL035C	2244.04	-1.01526	0.193246	8.2888e-08	2.97518e-07
YNL050C	845.614	-1.16008	0.222203	8.41377e-08	3.01828e-07
snR59	26.6092	-4.23629	0.842502	8.66816e-08	3.10724e-07
YPR176C	1608.69	0.986797	0.187753	8.67184e-08	3.10724e-07
YLR419W	1008.6	-1.23442	0.237428	8.68617e-08	3.11057e-07
YNL159C	872.914	1.05237	0.200744	8.71444e-08	3.11888e-07
YMR269W	776.752	-1.57648	0.307582	8.78642e-08	3.14281e-07
YIL077C	907.025	1.15136	0.220578	8.79175e-08	3.1429e-07
YNL290W	1278.32	-0.980115	0.186864	8.99587e-08	3.214e-07
YHR139C	74.5855	2.11264	0.418688	9.05008e-08	3.2315e-07
YNL185C	238.793	-1.30178	0.251568	9.24995e-08	3.30095e-07
YDR371W	957.503	1.08718	0.20837	9.55713e-08	3.4086e-07
YBR278W	880.912	1.0047	0.192105	9.71154e-08	3.46167e-07
YDR310C	1967.11	-1.13865	0.219558	9.73168e-08	3.46684e-07
YNR070W	183.854	1.36783	0.265343	9.84326e-08	3.50456e-07
YJL208C	895.975	-1.19065	0.229635	9.92703e-08	3.53235e-07
YDR346C	4218.81	-1.11198	0.213856	1.00034e-07	3.55741e-07
YML052W	2266.82	-1.11107	0.213715	1.0009e-07	3.55741e-07
YMR062C	24914.4	1.37741	0.270272	1.04008e-07	3.69453e-07
YIR018C-A	41.3644	2.83129	0.573806	1.0439e-07	3.70597e-07
YIL152W	838.097	1.16516	0.224705	1.04907e-07	3.72216e-07
YDR419W	1125.62	1.0842	0.208585	1.06876e-07	3.78778e-07
YHR121W	1137.9	-1.02622	0.197257	1.06879e-07	3.78778e-07
YNR058W	1063.82	1.72906	0.341389	1.07485e-07	3.80706e-07
YHR144C	469.984	-1.37024	0.267319	1.10333e-07	3.9057e-07
YLR138W	5989.7	1.406	0.274146	1.12901e-07	3.99432e-07
YDR040C	1280.91	0.989472	0.190037	1.13499e-07	4.01315e-07
YBL035C	627.058	-1.05846	0.204135	1.14356e-07	4.04116e-07
YKL072W	1285.92	1.11152	0.214712	1.1556e-07	4.08135e-07
YDR179W-A	974.027	1.03622	0.199707	1.17587e-07	4.15056e-07
YDR365C	2907.13	-1.85002	0.368923	1.18491e-07	4.1801e-07
YDR010C	33.1385	3.37508	0.682745	1.19814e-07	4.22432e-07
YGL238W	2725.38	-1.07752	0.208576	1.23131e-07	4.33881e-07
YPR178W	984.104	1.03883	0.200572	1.23346e-07	4.34388e-07
YDL064W	905.952	-1.16316	0.226132	1.26923e-07	4.46732e-07
YJR041C	1255.23	-1.80081	0.35912	1.27218e-07	4.47513e-07
YOL115W	1062.51	-1.10056	0.213455	1.27296e-07	4.47532e-07
YKR037C	353.156	-1.16514	0.226775	1.31068e-07	4.60532e-07
YMR233W	416.708	-1.27202	0.248783	1.31897e-07	4.63179e-07
YIL116W	12450.8	1.2013	0.234025	1.32663e-07	4.65605e-07
YBL011W	1777.94	-0.938758	0.181599	1.33623e-07	4.68706e-07
YDR023W	7383.87	-1.01967	0.197557	1.34377e-07	4.71085e-07
YLR014C	629.192	-1.64962	0.328342	1.35452e-07	4.74584e-07
YLR139C	401.772	-1.14339	0.222661	1.35954e-07	4.76072e-07
YOR386W	412.895	1.68709	0.335624	1.36836e-07	4.78886e-07
YGR035C	239.006	-1.35748	0.266819	1.37592e-07	4.81261e-07
YGL059W	3022.99	2.09153	0.421177	1.39252e-07	4.8679e-07
YBR139W	3809.44	1.96745	0.397462	1.40474e-07	4.90782e-07
YOL048C	1064.69	1.55109	0.307275	1.40761e-07	4.91507e-07
YHR086W	921.249	-0.996665	0.193224	1.41283e-07	4.93049e-07
YPR002C-A	42.5559	2.71319	0.553333	1.42099e-07	4.95619e-07
YMR207C	2052.81	0.995042	0.192833	1.4323e-07	4.99278e-07
YOR005C	610.803	1.05238	0.204172	1.44273e-07	5.02631e-07
YDR379W	1431.87	0.965374	0.187054	1.47311e-07	5.12926e-07
YNL280C	2285.02	-0.915673	0.177364	1.4998e-07	5.21925e-07
YGR279C	7082.43	-1.0893	0.212283	1.50947e-07	5.24993e-07
YMR147W	155.079	-1.41191	0.279121	1.51565e-07	5.26843e-07
YLR234W	202.714	-1.29815	0.255654	1.55168e-07	5.39063e-07
YCL009C	20937.9	0.912709	0.177124	1.62573e-07	5.64472e-07
YPR145W	61226.6	1.3258	0.263978	1.64527e-07	5.70934e-07
YGR266W	1784.06	0.93656	0.182043	1.64827e-07	5.71652e-07
YDR435C	948.559	1.08292	0.211656	1.65142e-07	5.72423e-07
YOL021C	2077.29	-1.22838	0.242074	1.69127e-07	5.85909e-07
YJL192C	1503.12	-0.943799	0.183831	1.69614e-07	5.87263e-07
YKL042W	428.567	-1.25013	0.246601	1.70726e-07	5.90782e-07
YLR440C	793.278	-1.04122	0.203683	1.72332e-07	5.96005e-07
YCL017C	3105.78	1.01254	0.197763	1.74672e-07	6.03707e-07
YGR108W	1439.49	-1.48211	0.295722	1.74755e-07	6.03707e-07
YPL191C	444.671	1.38442	0.274712	1.7681e-07	6.10464e-07
YLL016W	608.01	1.29856	0.256801	1.77054e-07	6.10965e-07
YNL194C	49.5201	2.71014	0.559374	1.80327e-07	6.2191e-07
snR45	37.6571	-2.66313	0.549683	1.80768e-07	6.23082e-07
YBR043C	6942.85	1.29987	0.257295	1.82568e-07	6.28937e-07
YPR010C-A	868.682	1.11045	0.218051	1.84059e-07	6.33717e-07
YBL001C	2613.81	0.9119	0.177962	1.86026e-07	6.40133e-07
YBR234C	5268.35	0.976617	0.190932	1.86729e-07	6.42193e-07
YKL208W	371.409	1.14332	0.225118	1.8814e-07	6.46685e-07
YNR001C	14596.5	1.91774	0.388322	1.89837e-07	6.52156e-07
YER058W	553.81	1.52584	0.30548	1.90689e-07	6.54717e-07
snR191	29.702	-3.71275	0.773078	1.92178e-07	6.59461e-07
YER139C	476.776	1.10625	0.217688	1.9256e-07	6.60404e-07
YDR383C	717.234	1.06695	0.209751	1.95679e-07	6.70727e-07
YGR027W-B	407.063	1.50158	0.300984	2.01408e-07	6.89983e-07
YOR292C	479.233	1.15648	0.228536	2.0493e-07	7.01656e-07
YML103C	2179.99	-1.14425	0.22646	2.09227e-07	7.15974e-07
YMR176W	1420.11	0.976802	0.191975	2.13848e-07	7.3138e-07
YOL163W	124.909	1.55479	0.31324	2.21042e-07	7.55565e-07
YGR004W	372.168	-1.15311	0.228789	2.22296e-07	7.59428e-07
YAR009C	468.234	1.36431	0.27288	2.22747e-07	7.60549e-07
YJL100W	1027.82	1.10105	0.217864	2.24337e-07	7.65554e-07
YBR010W	10990.6	-1.06503	0.210769	2.24878e-07	7.66973e-07
YNL088W	1760.74	-0.940038	0.185079	2.26621e-07	7.72492e-07
YHR138C	664.331	1.47185	0.296062	2.27837e-07	7.76208e-07
YLR303W	21819.7	-0.901098	0.177419	2.36332e-07	8.04702e-07
YJL209W	662.276	-1.05119	0.208233	2.37798e-07	8.0925e-07
YHR013C	1028.1	-1.0754	0.21328	2.3861e-07	8.11563e-07
YNL216W	1785.17	-0.948677	0.187392	2.45255e-07	8.33705e-07
YMR275C	1714.68	0.928947	0.183212	2.45704e-07	8.34771e-07
YDL199C	469.905	1.80046	0.368533	2.51376e-07	8.53571e-07
YKR065C	781.4	-1.00514	0.199196	2.52438e-07	8.56706e-07
YHR176W	763.574	1.35558	0.272487	2.54413e-07	8.62933e-07
YKR098C	600.2	1.04844	0.208032	2.5487e-07	8.64008e-07
YDR194C	3062.54	-0.956029	0.189257	2.6165e-07	8.86265e-07
YMR315W-A	29.4396	3.76871	0.783443	2.61723e-07	8.86265e-07
YCR024C	604.001	1.17954	0.235584	2.62807e-07	8.89444e-07
YLR005W	2020.99	1.03229	0.204937	2.6352e-07	8.91367e-07
YDR043C	288.537	1.67217	0.341222	2.65958e-07	8.99123e-07
YBR061C	845.736	-1.22081	0.244797	2.69606e-07	9.10879e-07
YOL002C	1339.87	-0.953244	0.188982	2.69731e-07	9.10879e-07
YLR307W	46.4599	2.91981	0.615579	2.72312e-07	9.1909e-07
YCR047C	1442.19	-1.54831	0.315349	2.75767e-07	9.30243e-07
YBR085W	148.786	-1.8255	0.376216	2.79648e-07	9.42817e-07
YCR036W	1873.04	1.12912	0.225632	2.81974e-07	9.50139e-07
YOR265W	924.356	0.9659	0.191799	2.83067e-07	9.53302e-07
YPL177C	1489.5	0.949851	0.188558	2.87078e-07	9.6628e-07
YOL082W	1647.16	1.28121	0.258257	2.96582e-07	9.97725e-07
YBR056W-A	410.05	1.76388	0.363096	2.98478e-07	1.00356e-06
YGR204W	27950.9	0.938413	0.185776	2.99889e-07	1.00775e-06
YDR034C	4917.92	1.03433	0.20646	3.04145e-07	1.0215e-06
YOR228C	639.564	1.15708	0.232307	3.08257e-07	1.03474e-06
YOR008C	2735.7	-0.88392	0.175979	3.18435e-07	1.06833e-06
YBR255W	1434.88	1.00826	0.201438	3.18862e-07	1.06918e-06
RUF20	158.15	1.41797	0.288254	3.19825e-07	1.07182e-06
YGL096W	262.935	1.36133	0.276219	3.2227e-07	1.07943e-06
YCL048W	33.0169	3.06694	0.646854	3.26782e-07	1.09395e-06
YOR289W	608.548	1.61807	0.33226	3.27031e-07	1.09419e-06
YKR019C	735.573	0.991089	0.198477	3.45183e-07	1.15429e-06
YJR151C	315.627	1.23857	0.25065	3.48853e-07	1.16593e-06
YLR182W	1297.79	-0.980929	0.196877	3.49252e-07	1.16664e-06
YKL080W	8472.73	0.875505	0.174669	3.59551e-07	1.20039e-06
YKR033C	23.7929	7.78107	2.68539	3.6794e-07	1.22773e-06
YJL187C	1213.46	-0.936016	0.187867	3.69121e-07	1.231e-06
YER165W	12091.1	-0.985619	0.198476	3.89054e-07	1.29672e-06
YKL201C	2559.82	-1.25674	0.256143	3.89249e-07	1.29672e-06
YGL061C	334.501	-1.1881	0.241403	3.92003e-07	1.30519e-06
YIL145C	1608.05	-0.935937	0.188267	4.00443e-07	1.33258e-06
YDL074C	2170.67	-0.944175	0.18998	4.00682e-07	1.33265e-06
YLR278C	1697.69	-0.91743	0.184731	4.02392e-07	1.33762e-06
YJR035W	1227.99	1.02973	0.207877	4.09349e-07	1.36001e-06
YOR230W	9217.61	1.07723	0.218006	4.13299e-07	1.37239e-06
YHR112C	3139.3	0.917341	0.184503	4.16447e-07	1.38184e-06
YGR099W	618.097	-1.18388	0.241055	4.16592e-07	1.38184e-06
YIL058W	33.0415	3.05998	0.653207	4.20079e-07	1.39265e-06
YFL037W	5348.06	-1.02643	0.207302	4.22199e-07	1.39893e-06
YHR026W	4614.34	-0.868914	0.174694	4.22432e-07	1.39895e-06
YKL069W	899.431	0.959714	0.19359	4.28661e-07	1.41882e-06
YDR238C	3525.72	-0.894433	0.180052	4.29024e-07	1.41926e-06
YPR005C	229.411	1.28979	0.263911	4.31166e-07	1.42558e-06
YBR198C	2042.95	-0.989183	0.200067	4.33922e-07	1.43392e-06
YDR314C	619.584	1.01094	0.204609	4.42508e-07	1.46151e-06
YGL258W-A	42.9816	2.47758	0.528316	4.43603e-07	1.46397e-06
YOR209C	3306.1	-0.877125	0.176676	4.43728e-07	1.46397e-06
YOR027W	5369.25	-1.0051	0.203524	4.47672e-07	1.47619e-06
YKL122C	1334.76	-0.916538	0.18505	4.49176e-07	1.48036e-06
YNL208W	6510.95	1.14053	0.232235	4.52862e-07	1.49171e-06
YPR158W-B	240.586	2.01084	0.425556	4.55002e-07	1.49796e-06
YOL011W	1510.02	-0.902554	0.182122	4.58124e-07	1.50743e-06
YBL080C	540.894	1.07074	0.217612	4.61389e-07	1.51737e-06
YOR271C	3339.72	-1.09277	0.222778	4.71767e-07	1.55067e-06
YDL155W	1002.97	-1.08893	0.221911	4.72254e-07	1.55144e-06
YDR188W	5937.39	-0.887134	0.179341	4.78763e-07	1.57198e-06
YPR052C	396.499	-1.31509	0.27099	4.80811e-07	1.57787e-06
YNL299W	961.148	-1.33243	0.274886	4.81899e-07	1.5806e-06
YJR139C	7470.09	-0.883263	0.177281	4.82186e-07	1.5807e-06
YHL020C	1361.64	-1.22135	0.25071	4.85641e-07	1.59118e-06
YDR298C	3540.12	0.92348	0.187114	4.96323e-07	1.62531e-06
YLR399C	4120.4	-0.8597	0.173806	4.96982e-07	1.62661e-06
YOL052C-A	126.624	2.93676	0.641243	5.00068e-07	1.63584e-06
YNR019W	1122.67	-1.1514	0.236005	5.06029e-07	1.65446e-06
YMR063W	541.816	1.24484	0.255956	5.071e-07	1.65708e-06
YBL079W	2244.33	-1.08083	0.220684	5.08037e-07	1.65926e-06
YAR042W	1812.24	-0.970155	0.197395	5.16293e-07	1.68534e-06
YDL021W	457.949	1.61869	0.338876	5.19648e-07	1.69539e-06
YCL008C	1111.24	0.951099	0.19326	5.20654e-07	1.69777e-06
YPL041C	323.557	1.11406	0.22801	5.23491e-07	1.70612e-06
YJR055W	217.824	-1.54395	0.322831	5.28568e-07	1.72176e-06
YMR058W	4513.18	-1.0581	0.216594	5.28923e-07	1.722e-06
YDR397C	1750.79	-1.12622	0.231037	5.32605e-07	1.73307e-06
YGL172W	1300.81	-0.914134	0.185889	5.37079e-07	1.74671e-06
YER039C-A	77.6401	2.03511	0.433049	5.3986e-07	1.75483e-06
YOL055C	640.678	1.01358	0.206857	5.44453e-07	1.76883e-06
YLR291C	1234.89	-0.989324	0.202055	5.55616e-07	1.80414e-06
YEL038W	1925.6	0.917541	0.186672	5.56641e-07	1.80652e-06
YKL130C	473.938	-1.06566	0.218424	5.5992e-07	1.8162e-06
YOR152C	304.595	1.41481	0.294645	5.73522e-07	1.85934e-06
YGR246C	1461.63	0.955138	0.194876	5.73841e-07	1.8594e-06
YPL270W	2916.4	1.07761	0.22113	5.79417e-07	1.87619e-06
YDL036C	585.868	-1.18245	0.24405	5.7963e-07	1.87619e-06
YEL043W	1535.5	-0.918725	0.187457	5.80906e-07	1.87933e-06
YGL146C	149.853	1.64947	0.347536	5.93463e-07	1.91895e-06
YDR352W	2189.04	0.961153	0.196791	6.2525e-07	2.02017e-06
YNL044W	1862.73	-1.09683	0.22633	6.25424e-07	2.02017e-06
YNR051C	4285.42	-0.948463	0.194473	6.38101e-07	2.06004e-06
YJR084W	1073.93	0.935072	0.191534	6.47981e-07	2.08979e-06
YML045W	67.0143	1.88316	0.401534	6.47994e-07	2.08979e-06
YJL202C	38.8567	2.477	0.536254	6.48365e-07	2.08989e-06
YKR095W	2878.54	-0.915031	0.187636	6.62869e-07	2.13553e-06
YBR252W	959.545	-1.04564	0.215747	6.64543e-07	2.1398e-06
snR87	28.0954	-2.92042	0.640741	7.08369e-07	2.27897e-06
YHR180W	179.119	1.405	0.295003	7.08503e-07	2.27897e-06
tN(GUU)P	48.5083	2.53239	0.552791	7.10853e-07	2.28534e-06
YLR373C	862.42	-1.00096	0.206771	7.25387e-07	2.33084e-06
YOR028C	193.462	-1.24217	0.25947	7.28604e-07	2.33996e-06
YDR018C	77.4394	1.75124	0.373621	7.32264e-07	2.35049e-06
YBR155W	1285.24	-1.34899	0.283522	7.36593e-07	2.36316e-06
YOL076W	1261.79	-1.11387	0.231581	7.45972e-07	2.392e-06
YAL028W	231.54	1.64105	0.349282	7.46572e-07	2.39268e-06
YDR527W	1865.24	-1.14382	0.238249	7.51886e-07	2.40846e-06
YGR078C	1034.05	-1.00391	0.207817	7.65831e-07	2.45185e-06
YMR099C	3375.29	0.884265	0.182087	7.76596e-07	2.48503e-06
YKR009C	562.08	1.14123	0.237682	7.77906e-07	2.48793e-06
YGR105W	1147.01	-0.924525	0.191192	8.08465e-07	2.58432e-06
YJR043C	568.77	-1.05031	0.21851	8.12651e-07	2.59636e-06
YKR010C	777.605	-1.10615	0.2308	8.15083e-07	2.60277e-06
YKR074W	862.852	-1.12532	0.235074	8.27097e-07	2.63977e-06
YGR169C	306.418	-1.13982	0.238292	8.30815e-07	2.65027e-06
YJR156C	129.013	1.45131	0.307474	8.34084e-07	2.65932e-06
YIL009W	905.299	-1.15315	0.241337	8.3597e-07	2.66395e-06
YOR142W-B	122.768	2.09577	0.456968	8.40661e-07	2.67752e-06
YBR082C	6386.95	-0.845123	0.174943	8.49323e-07	2.70371e-06
YOR298C-A	6664.65	-1.07158	0.223697	8.58988e-07	2.73306e-06
YBR091C	237.445	-1.28859	0.271896	8.71279e-07	2.77074e-06
YDR065W	325.187	-1.07681	0.225002	8.81534e-07	2.8019e-06
YDR325W	834.383	-0.957274	0.198995	8.84791e-07	2.81081e-06
RNA170	56.2026	2.05575	0.44777	9.05007e-07	2.87355e-06
YBR240C	168.122	1.3515	0.286358	9.19845e-07	2.91916e-06
YDR476C	1066.03	1.10891	0.232261	9.20648e-07	2.9202e-06
YKL112W	1658.05	-0.878808	0.182944	9.3809e-07	2.974e-06
YOR295W	283.255	-1.21711	0.256902	9.53104e-07	3.02004e-06
YIL071C	689.274	1.05207	0.220183	9.56511e-07	3.0284e-06
YIL010W	1395.13	0.967804	0.201766	9.56725e-07	3.0284e-06
YER146W	965.241	-1.10301	0.231847	9.57613e-07	3.02965e-06
YPL255W	550.568	-1.2224	0.2583	9.71869e-07	3.07318e-06
YEL048C	285.545	-1.36325	0.290157	9.75692e-07	3.08369e-06
YMR223W	561.907	-1.13226	0.23835	9.83435e-07	3.10656e-06
YML034W	1297.01	-0.895714	0.186678	9.95476e-07	3.14299e-06
YHL031C	471.8	-1.14519	0.241345	9.96277e-07	3.14391e-06
YHR105W	273.467	1.17525	0.247776	1.00115e-06	3.15768e-06
YDL052C	2059.04	-0.875008	0.182432	1.02733e-06	3.23858e-06
YCL038C	824.002	1.1699	0.247206	1.06148e-06	3.34454e-06
YML029W	1279.21	0.900775	0.188129	1.07217e-06	3.37649e-06
YML076C	1873.83	1.14993	0.242888	1.0744e-06	3.38177e-06
YLR257W	6935.35	1.03199	0.216807	1.0786e-06	3.39328e-06
YJR014W	2147.22	-0.930428	0.194856	1.08587e-06	3.41439e-06
YLR350W	1100.82	-0.926458	0.194543	1.11889e-06	3.51643e-06
YNL163C	1849.88	-1.22529	0.260517	1.12805e-06	3.5434e-06
YJL121C	1487	-0.957826	0.199804	1.14718e-06	3.60166e-06
YDR120C	2675.8	-1.47759	0.318901	1.16733e-06	3.66306e-06
YKL215C	1600.35	0.896594	0.18786	1.16901e-06	3.66576e-06
YAL019W	1843.19	-1.16903	0.248393	1.16938e-06	3.66576e-06
YHR032W	2035.94	-1.15249	0.244743	1.176e-06	3.68463e-06
YBL064C	1587.32	1.40218	0.301572	1.17788e-06	3.68865e-06
YLR052W	1039.75	-1.07983	0.228536	1.17884e-06	3.68978e-06
YML094W	678.549	-1.11891	0.237266	1.18223e-06	3.69853e-06
YEL047C	3482.09	0.904852	0.190064	1.1871e-06	3.71186e-06
YNL047C	1037.87	0.898184	0.188401	1.19166e-06	3.72424e-06
YAR015W	6425.42	-1.41502	0.304129	1.19278e-06	3.72586e-06
YPR190C	1525.63	-1.38664	0.298575	1.22048e-06	3.81046e-06
YJL096W	600.788	-0.969992	0.204578	1.23184e-06	3.84398e-06
YLR397C	1324.3	-1.27414	0.272884	1.23843e-06	3.86259e-06
YOR324C	1113.26	0.899692	0.189094	1.24706e-06	3.88753e-06
YDR441C	698.996	-1.00554	0.212567	1.24976e-06	3.89396e-06
YCR011C	4289.5	0.992834	0.209197	1.25205e-06	3.89912e-06
snR62	104.254	1.63593	0.356925	1.31649e-06	4.09774e-06
YGL164C	1095.56	0.900117	0.189831	1.35174e-06	4.20533e-06
YNL238W	2341.77	-0.878389	0.185364	1.37384e-06	4.27193e-06
YER135C	30.8885	3.23792	0.732041	1.38856e-06	4.31553e-06
YKL057C	1694.86	-0.935981	0.198138	1.39561e-06	4.33527e-06
YDL195W	3564.96	-0.837119	0.176566	1.41018e-06	4.3783e-06
YPL201C	49.7446	-2.15596	0.483321	1.45153e-06	4.50442e-06
YPL154C	14071.1	1.34124	0.289745	1.47968e-06	4.58947e-06
YGR081C	964.304	-1.08609	0.232285	1.49543e-06	4.63598e-06
YBR086C	3962.95	-1.11384	0.238825	1.52986e-06	4.73924e-06
YER057C	3900.53	0.830625	0.175576	1.53027e-06	4.73924e-06
YMR086W	2989.25	0.89045	0.188638	1.53484e-06	4.75099e-06
YOR032C	77.262	1.78674	0.395555	1.55749e-06	4.81869e-06
YMR305C	3523.95	-0.855459	0.181069	1.55953e-06	4.82257e-06
YLR240W	1050.15	0.932476	0.198233	1.58171e-06	4.88871e-06
YKL033W-A	4232.43	0.933349	0.198293	1.58757e-06	4.90437e-06
YNL288W	1024.36	-0.90782	0.193192	1.6154e-06	4.98784e-06
YIL132C	156.244	-1.51204	0.331756	1.6356e-06	5.04768e-06
YNL199C	1397.81	-1.05777	0.227002	1.66371e-06	5.13187e-06
YGR153W	217.811	1.25685	0.272211	1.67382e-06	5.16047e-06
[truncated: 4,164 more rows]

## Sheet: Full EdgeR_analysis
targetID	log2FoldChange	P.Value	FDR	logCPM
YNL117W	8.5906	3.54555e-08	0.000136347	8.72137
YIR030C	5.16948	6.89736e-08	0.000136347	6.41931
YAL062W	6.96646	1.06027e-07	0.000136347	8.95101
YCL048W-A	8.24153	1.36814e-07	0.000136347	5.30579
YIR029W	5.73024	1.38255e-07	0.000136347	8.49529
YLR142W	4.93053	1.52541e-07	0.000136347	7.10767
YIR027C	6.31774	2.91898e-07	0.000136347	6.09343
YPL054W	5.67635	2.92511e-07	0.000136347	4.92184
YGR055W	-5.83501	3.04177e-07	0.000136347	8.49949
YMR170C	4.45253	3.1651e-07	0.000136347	7.72245
YDL210W	5.42355	3.62785e-07	0.000136347	6.38186
YBL049W	5.49028	3.73241e-07	0.000136347	5.25806
YLR155C	6.44372	3.73435e-07	0.000136347	3.72999
YGR087C	4.86561	4.23861e-07	0.000136347	5.77359
YOL039W	-5.54005	4.39944e-07	0.000136347	9.42838
YLR185W	-4.69507	4.42794e-07	0.000136347	8.65058
YER131W	-6.53083	4.92773e-07	0.000136347	9.63991
YJL190C	-6.07815	5.20639e-07	0.000136347	9.63585
YGR043C	3.67593	5.93673e-07	0.000136347	4.87957
YLR388W	-4.5419	6.11275e-07	0.000136347	8.18359
YOR003W	4.26871	6.60734e-07	0.000136347	7.72156
YIR028W	9.3682	6.61403e-07	0.000136347	8.32491
YGR034W	-5.40943	6.85834e-07	0.000136347	9.52001
YHR010W	-5.14055	6.89677e-07	0.000136347	9.54496
YPL107W	4.17851	7.11889e-07	0.000136347	8.45418
YGL147C	-5.97462	7.16145e-07	0.000136347	9.43617
YFR032C-A	-4.34172	7.95407e-07	0.000136347	7.61119
YHR021C	-4.73181	8.10731e-07	0.000136347	8.74889
YPL131W	-5.59613	8.37381e-07	0.000136347	10.7398
YML073C	-3.92286	8.56648e-07	0.000136347	9.13879
YML042W	3.25073	8.58455e-07	0.000136347	5.59469
YDL082W	-4.81766	9.7264e-07	0.000136347	9.20564
YLR406C	-5.4652	9.74761e-07	0.000136347	9.01253
YOR344C	-2.85821	9.76407e-07	0.000136347	6.72754
YGL031C	-5.57942	1.05087e-06	0.000136347	9.64221
YLR372W	-3.66857	1.07385e-06	0.000136347	8.49912
YNL069C	-5.07996	1.08841e-06	0.000136347	10.0884
YPL198W	-4.37415	1.10998e-06	0.000136347	8.49572
YAL037C-B	-3.22642	1.12056e-06	0.000136347	4.67158
YPL249C-A	-4.90077	1.13336e-06	0.000136347	10.1591
YDR508C	-3.51398	1.15231e-06	0.000136347	8.74023
YNL178W	-5.33653	1.21835e-06	0.000136347	10.3331
YJR009C	-5.43488	1.23065e-06	0.000136347	11.4662
YJL189W	-4.21917	1.23545e-06	0.000136347	8.90883
YDL069C	3.23679	1.24589e-06	0.000136347	6.52939
YOL120C	-4.52476	1.27866e-06	0.000136347	10.1082
YLR205C	3.94077	1.29841e-06	0.000136347	5.64221
YKL056C	-4.83212	1.30369e-06	0.000136347	10.0121
YOL040C	-4.97226	1.30648e-06	0.000136347	10.2022
snR44	-3.50237	1.35395e-06	0.000136347	4.3031
YBR203W	3.93842	1.39217e-06	0.000136347	6.45899
YDL081C	-4.42736	1.40789e-06	0.000136347	9.63324
YDR025W	-4.4612	1.41084e-06	0.000136347	9.44645
YLR053C	8.1664	1.44952e-06	0.000136347	7.72379
YLR264W	-4.39559	1.45501e-06	0.000136347	8.20343
YDR012W	-4.0466	1.46652e-06	0.000136347	9.2807
YNL302C	-4.53587	1.48921e-06	0.000136347	9.63036
YLR307C-A	6.1432	1.54603e-06	0.000136347	3.59994
YBR189W	-5.4222	1.57011e-06	0.000136347	10.4432
YIR042C	3.43469	1.57899e-06	0.000136347	6.80678
YIL146C	2.84007	1.61044e-06	0.000136347	7.01051
YCR099C	2.60278	1.65314e-06	0.000136347	5.43787
YBR092C	-4.38437	1.65588e-06	0.000136347	5.71776
YPR102C	-5.10348	1.67355e-06	0.000136347	9.26729
YDR471W	-4.22399	1.69722e-06	0.000136347	9.13475
YJR145C	-5.28419	1.73351e-06	0.000136347	10.2413
YJL177W	-5.51033	1.73625e-06	0.000136347	9.19202
YDL130W	-5.03288	1.75677e-06	0.000136347	9.56481
YDL184C	-4.33435	1.79134e-06	0.000136347	10.5883
YBR069C	-4.16334	1.81135e-06	0.000136347	7.85667
YBL087C	-5.02626	1.81362e-06	0.000136347	8.86856
YMR088C	5.01926	1.8377e-06	0.000136347	11.0712
YIL037C	3.91798	1.84134e-06	0.000136347	4.14371
YPR061C	2.41275	1.86065e-06	0.000136347	5.78244
YCR034W	-3.62297	1.86376e-06	0.000136347	7.48851
YBR012C	3.89394	1.86754e-06	0.000136347	6.16585
YMR116C	-5.47279	1.87263e-06	0.000136347	10.5435
YDR144C	-2.3705	1.89366e-06	0.000136347	6.32636
YNL067W	-3.33757	1.92887e-06	0.000136347	9.15694
YHR141C	-4.1256	1.9349e-06	0.000136347	9.64859
YKL109W	-2.52799	1.96005e-06	0.000136347	7.19831
YLR432W	-4.63882	1.98225e-06	0.000136347	9.10357
YMR230W	-4.25625	1.99318e-06	0.000136347	8.95721
YDR119W-A	5.35706	2.07407e-06	0.000136347	6.30342
YIL069C	-4.60613	2.10042e-06	0.000136347	9.17616
YNR050C	-4.47625	2.10195e-06	0.000136347	10.5272
YLR367W	-3.59797	2.16163e-06	0.000136347	7.68119
YMR194W	-3.5934	2.17801e-06	0.000136347	8.60602
YMR143W	-4.06007	2.18818e-06	0.000136347	9.69827
YDL133C-A	-3.92402	2.19809e-06	0.000136347	9.40668
YDR064W	-4.70102	2.19809e-06	0.000136347	9.94616
YLR061W	-5.01356	2.22273e-06	0.000136347	9.40926
YOR293W	-4.96166	2.23279e-06	0.000136347	9.5872
YLR150W	-4.6535	2.23672e-06	0.000136347	10.1661
YBR191W	-5.2758	2.2418e-06	0.000136347	8.8851
YPR001W	5.50073	2.2545e-06	0.000136347	6.95168
YMR145C	-3.12098	2.26842e-06	0.000136347	8.21232
YDL191W	-3.81095	2.26969e-06	0.000136347	8.0248
YBL092W	-5.03907	2.32892e-06	0.000136347	10.1472
YDL083C	-5.70712	2.36252e-06	0.000136347	9.67814
YEL054C	-5.28799	2.37382e-06	0.000136347	9.60888
YJR008W	2.78041	2.37441e-06	0.000136347	6.11423
YPL250W-A	-4.5235	2.38991e-06	0.000136347	3.98274
YDR090C	3.76745	2.40832e-06	0.000136347	9.02338
YPL269W	3.52278	2.48369e-06	0.000136347	8.32324
YFR031C-A	-4.68641	2.48936e-06	0.000136347	10.0312
YKL006W	-5.01403	2.49433e-06	0.000136347	9.59676
YDR242W	6.19796	2.51633e-06	0.000136347	10.3603
YBR031W	-4.08924	2.57047e-06	0.000136347	10.1783
YKR057W	-4.15611	2.59433e-06	0.000136347	9.0262
YJR094W-A	-4.37378	2.60752e-06	0.000136347	8.97073
YIR007W	2.55099	2.63954e-06	0.000136347	6.00803
YNR053C	-4.86283	2.66784e-06	0.000136347	7.99457
YGL189C	-4.31912	2.67333e-06	0.000136347	10.2018
YOR063W	-4.72601	2.69053e-06	0.000136347	11.5952
YDL061C	-4.1224	2.69943e-06	0.000136347	8.6
YML026C	-4.77755	2.71329e-06	0.000136347	9.86605
YDL057W	2.7828	2.72027e-06	0.000136347	5.82347
YOR096W	-5.06268	2.72739e-06	0.000136347	9.74313
YHL033C	-4.14622	2.72944e-06	0.000136347	9.22721
YJL213W	3.77554	2.74298e-06	0.000136347	8.79064
YLR325C	-4.5336	2.76272e-06	0.000136347	9.92189
YIR031C	5.41226	2.78804e-06	0.000136347	10.0213
YGL076C	-4.29464	2.89218e-06	0.000136347	10.2024
YDR382W	-4.9027	2.89631e-06	0.000136347	9.67409
YJR149W	2.35016	2.90912e-06	0.000136347	5.98569
YOR095C	-6.91687	2.93588e-06	0.000136347	6.23654
YGL123W	-4.40291	2.96418e-06	0.000136347	10.964
YJR152W	8.31381	2.96745e-06	0.000136347	12.4566
YPL134C	2.5369	2.97211e-06	0.000136347	6.63086
YBR285W	4.91276	2.97636e-06	0.000136347	4.70003
YML024W	-3.7558	2.99343e-06	0.000136347	9.54511
YPL088W	2.24123	3.0192e-06	0.000136347	6.15509
YHL015W	-4.78461	3.03541e-06	0.000136347	10.6196
YDR222W	-2.88744	3.08145e-06	0.000136347	4.31689
YIL052C	-4.8243	3.08378e-06	0.000136347	9.29741
YBR291C	-3.32152	3.08414e-06	0.000136347	7.68965
YCL027W	3.49386	3.09745e-06	0.000136347	3.70826
YIL169C	-3.24426	3.13531e-06	0.000136347	5.57535
YBL072C	-4.41499	3.1722e-06	0.000136347	9.64566
YDR170W-A	4.04544	3.17631e-06	0.000136347	6.15306
YDR418W	-3.71123	3.23087e-06	0.000136347	9.75734
YBR048W	-4.10808	3.23587e-06	0.000136347	9.37451
YLR167W	-5.33423	3.24859e-06	0.000136347	11.2832
YLR029C	-4.58723	3.26635e-06	0.000136347	10.6421
YER074W	-4.37915	3.27856e-06	0.000136347	9.41576
YHR006W	3.2939	3.29204e-06	0.000136347	9.16982
YKL180W	-4.59676	3.2994e-06	0.000136347	9.67361
YOR234C	-3.60083	3.39849e-06	0.000136347	8.44833
YIL018W	-4.32345	3.40019e-06	0.000136347	10.6537
YOL159C	2.40463	3.44643e-06	0.000136347	6.06762
YPL213W	2.55946	3.44662e-06	0.000136347	6.35254
YDL136W	-3.76659	3.45062e-06	0.000136347	8.65054
YDL075W	-4.27014	3.45754e-06	0.000136347	9.7796
YIL089W	3.03754	3.47568e-06	0.000136347	4.55472
YPL229W	2.34149	3.48387e-06	0.000136347	6.16494
YOL121C	-4.44453	3.50267e-06	0.000136347	8.99729
YOL110W	2.11319	3.53481e-06	0.000136347	5.97893
YBL029W	-3.1203	3.53532e-06	0.000136347	5.26392
YER117W	-4.0131	3.53977e-06	0.000136347	9.71809
YIL158W	-2.37831	3.63818e-06	0.000139268	5.80928
YER056C-A	-4.65693	3.67582e-06	0.000139408	8.88813
YMR271C	3.47415	3.68709e-06	0.000139408	6.58959
YPR043W	-4.13791	3.72999e-06	0.000139918	9.8179
YJR123W	-4.60809	3.74597e-06	0.000139918	10.9652
YOR310C	-3.61572	3.82178e-06	0.000141889	7.8645
YDR450W	-4.22419	3.86417e-06	0.000142604	9.79358
YOR342C	-3.28233	3.96716e-06	0.000144803	6.69002
YJL206C	2.24534	3.97075e-06	0.000144803	5.98741
YNR054C	-3.5403	4.01258e-06	0.000145468	5.43953
YLL045C	-4.95734	4.03942e-06	0.000145585	10.5655
YIL148W	-3.89705	4.08968e-06	0.000146539	9.57338
YGL121C	3.34788	4.1599e-06	0.000147521	4.3995
YPL143W	-3.89233	4.16496e-06	0.000147521	9.66046
YPL272C	3.17703	4.19993e-06	0.00014791	6.21152
YPL090C	-4.37208	4.22766e-06	0.00014804	9.89865
YKR034W	7.39141	4.31317e-06	0.000150181	8.25756
YHR049W	-2.34691	4.43581e-06	0.000152575	6.91682
YNL168C	2.24853	4.45377e-06	0.000152575	7.53813
YBR025C	-4.27093	4.45619e-06	0.000152575	8.84835
YKR094C	-3.86756	4.52333e-06	0.000153647	9.40354
YOR369C	-4.63964	4.53736e-06	0.000153647	10.5169
YOR167C	-3.28165	4.6253e-06	0.000155769	9.03368
YJR025C	2.79262	4.67243e-06	0.000155826	8.71479
YLL058W	2.53181	4.70516e-06	0.000155826	5.60746
YGR148C	-3.91617	4.70817e-06	0.000155826	9.56387
YOR328W	2.93709	4.72814e-06	0.000155826	7.48985
YER060W	3.19436	4.7946e-06	0.000156513	4.67431
YDR085C	2.67433	4.79976e-06	0.000156513	5.22742
YIL133C	-4.31168	4.84555e-06	0.000157174	9.53229
YDL048C	-2.19229	4.87967e-06	0.000157452	6.2587
YLR048W	-4.78357	4.92395e-06	0.000157625	10.0549
YDR047W	-2.43984	4.93616e-06	0.000157625	6.5898
YDL149W	1.97232	5.09562e-06	0.000161342	6.04453
YML063W	-4.88361	5.10493e-06	0.000161342	10.1895
YIL094C	-3.60638	5.23445e-06	0.000163838	10.2528
YHR089C	-4.68246	5.23709e-06	0.000163838	8.03836
YPL079W	-3.60944	5.30098e-06	0.000163943	9.32312
YLR413W	-5.82832	5.33462e-06	0.000163943	8.10084
YDR500C	-3.77433	5.34382e-06	0.000163943	9.30476
YJR147W	-3.00078	5.36051e-06	0.000163943	5.55236
YOR226C	-2.24439	5.37342e-06	0.000163943	6.86129
YKL152C	-4.07376	5.6131e-06	0.000170411	12.0552
YCR100C	2.7062	5.69597e-06	0.00017208	5.70274
YOR312C	-3.8605	5.73914e-06	0.000172538	9.70789
YPL017C	3.62465	5.76768e-06	0.000172555	4.42641
YOR182C	-3.93557	5.89653e-06	0.000174922	8.01353
YBL081W	-2.63316	5.90358e-06	0.000174922	6.27206
YDR233C	-2.51	6.01162e-06	0.000176063	8.78536
YLR448W	-4.18182	6.01243e-06	0.000176063	8.72107
YJR011C	2.49236	6.0278e-06	0.000176063	5.97743
YHR209W	2.72834	6.1163e-06	0.000176787	5.11
YMR156C	2.68748	6.14591e-06	0.000176787	5.47028
YNL301C	-2.72686	6.16301e-06	0.000176787	7.71753
YNL284C-B	3.00819	6.16733e-06	0.000176787	7.7459
YEL042W	-2.40037	6.31362e-06	0.000180143	7.45309
YJL136C	-3.92841	6.39248e-06	0.000181552	9.43643
YOL127W	-4.17566	6.4372e-06	0.000181984	10.2099
YMR242C	-4.38006	6.54723e-06	0.000183475	9.57889
YKL153W	-3.48891	6.56982e-06	0.000183475	4.25284
YCR031C	-4.22544	6.60325e-06	0.000183475	10.0504
YNL162W	-3.84721	6.63835e-06	0.000183475	9.39402
YIL117C	3.5284	6.65357e-06	0.000183475	7.30817
YER102W	-4.80565	6.66857e-06	0.000183475	9.13918
YLR044C	-4.37809	6.75437e-06	0.000184069	12.9798
YJL011C	-3.02412	6.77244e-06	0.000184069	4.31208
YOR340C	-5.29519	6.80216e-06	0.000184069	6.4081
YEL059C-A	2.77505	6.83408e-06	0.000184069	4.32723
YGR027C	-3.31075	6.87978e-06	0.000184069	9.88724
YJR148W	3.32626	6.89232e-06	0.000184069	11.0236
YKR097W	3.2713	6.93653e-06	0.000184069	4.61169
YOL093W	-3.17333	6.94325e-06	0.000184069	5.6651
YGR230W	2.38821	6.95897e-06	0.000184069	5.03271
YDR447C	-4.21097	7.02059e-06	0.000184905	9.22126
YLR287C-A	-2.96557	7.1326e-06	0.000186697	9.50566
YMR322C	4.77063	7.1492e-06	0.000186697	2.30421
YBL095W	1.97567	7.25693e-06	0.000188711	6.46596
YKL081W	-3.23835	7.34554e-06	0.000190212	9.83284
YMR290C	-5.66722	7.42088e-06	0.00019075	7.41118
YPR132W	-3.80163	7.45577e-06	0.00019075	9.9073
YEL072W	1.98467	7.45917e-06	0.00019075	7.03817
YCL037C	-5.90725	7.59534e-06	0.000192671	2.43569
YAR035W	4.11627	7.59887e-06	0.000192671	6.55717
YGR214W	-4.64708	7.62807e-06	0.000192671	9.73032
YGL030W	-4.43676	7.66665e-06	0.000192855	9.97592
YBL024W	-2.68008	7.78331e-06	0.000193534	7.09232
YBR295W	1.98693	7.79614e-06	0.000193534	6.29341
YCR013C	-3.62538	7.81236e-06	0.000193534	3.65222
YNL292W	-2.55334	7.81923e-06	0.000193534	5.54952
YGL103W	-4.16134	7.91337e-06	0.00019508	10.5043
YLR037C	2.61509	7.99061e-06	0.000195641	4.00633
YER064C	-3.04996	7.99961e-06	0.000195641	5.83423
YNL314W	2.09218	8.06831e-06	0.000195681	6.14246
YKL161C	2.14916	8.0813e-06	0.000195681	6.27674
YHR052W	-3.56341	8.09649e-06	0.000195681	7.0093
YBR088C	-2.66182	8.12878e-06	0.000195694	6.30267
YKL216W	-3.58889	8.17105e-06	0.000195946	9.24946
YBR171W	-1.79349	8.29071e-06	0.000197852	6.37271
YER126C	-3.22108	8.31471e-06	0.000197852	7.06833
YDR514C	-2.41281	8.36006e-06	0.000198041	5.33935
YLR340W	-3.6172	8.38692e-06	0.000198041	10.3288
YER118C	-1.81266	8.64099e-06	0.000202497	6.41196
YHR028W-A	4.38985	8.66201e-06	0.000202497	2.45244
YBR228W	1.81839	8.67421e-06	0.000202497	6.39483
YGL159W	1.99333	8.80912e-06	0.000204419	6.39556
YCR057C	-4.82959	8.83811e-06	0.000204419	7.37433
YMR155W	2.03838	8.89491e-06	0.000204419	6.93201
YAL003W	-2.98297	8.91569e-06	0.000204419	9.99268
YIL009C-A	1.86174	8.9224e-06	0.000204419	5.92338
YFR029W	1.92913	8.9679e-06	0.000204701	6.56285
YPL227C	-1.99398	9.01997e-06	0.000205129	6.17682
YKR091W	4.09837	9.12961e-06	0.000206402	7.06723
YDR022C	2.1685	9.19994e-06	0.000206402	5.21325
YLR008C	-1.88897	9.21764e-06	0.000206402	6.17315
YDR072C	-2.04545	9.25707e-06	0.000206402	6.77547
YPR194C	3.1746	9.26258e-06	0.000206402	10.1145
YGL123C-A	-3.63042	9.28981e-06	0.000206402	2.86425
YDL229W	-4.09511	9.31037e-06	0.000206402	10.53
YGL196W	3.75896	9.41486e-06	0.000207259	8.46959
YIR039C	3.47059	9.4163e-06	0.000207259	5.47366
YGL135W	-3.92415	9.48918e-06	0.000207585	9.82585
YCL036W	-7.10395	9.55424e-06	0.000207585	5.90625
YPL037C	-2.30064	9.55516e-06	0.000207585	8.72999
YPL032C	-2.00387	9.58671e-06	0.000207585	7.051
snR49	-3.51662	9.59952e-06	0.000207585	3.55318
YNL278W	1.7777	9.68648e-06	0.000208733	6.39331
YGL055W	-2.47968	9.92588e-06	0.000212613	8.56128
YHR096C	3.11995	9.94862e-06	0.000212613	4.00437
YLR089C	2.79997	9.98127e-06	0.000212613	10.2194
YMR041C	1.98644	1.00045e-05	0.000212613	5.66822
YMR174C	2.76787	1.01945e-05	0.000215561	5.19488
YDR421W	2.11749	1.02803e-05	0.000215561	6.53816
YNL040W	2.29542	1.03121e-05	0.000215561	7.47179
YMR020W	2.22517	1.03135e-05	0.000215561	6.42511
YGR283C	-3.60482	1.03181e-05	0.000215561	5.18557
YNL096C	-3.07952	1.03624e-05	0.000215606	8.73481
YEL059W	5.01221	1.03902e-05	0.000215606	2.19286
YGR085C	-3.46824	1.04488e-05	0.000216094	9.01773
YML043C	-3.15603	1.05841e-05	0.000217224	5.60545
YPL245W	-2.42889	1.06089e-05	0.000217224	5.16309
YNL239W	3.45283	1.06092e-05	0.000217224	10.6249
YNL061W	-3.80824	1.09256e-05	0.000221566	7.43457
YKL089W	2.53742	1.09536e-05	0.000221566	7.05669
YKR093W	5.35959	1.09569e-05	0.000221566	9.15126
YCR020C	2.60085	1.09651e-05	0.000221566	4.89165
YDR385W	-3.14348	1.11306e-05	0.000223556	9.84605
YPR099C	3.66591	1.11629e-05	0.000223556	3.47273
YJL172W	4.76588	1.1174e-05	0.000223556	11.6553
YHR066W	-3.50801	1.12086e-05	0.000223556	6.58716
YLR186W	-3.5068	1.12673e-05	0.000223826	6.48995
YOR111W	1.95366	1.12948e-05	0.000223826	6.20884
YHR203C	-3.77956	1.14691e-05	0.000226551	9.75321
YBR172C	-2.49991	1.15457e-05	0.000227337	7.11752
YGL009C	-2.82729	1.16498e-05	0.000227391	10.225
YHL001W	-2.79344	1.16512e-05	0.000227391	8.50419
YOR348C	5.14449	1.16703e-05	0.000227391	6.895
YLR246W	1.72494	1.16961e-05	0.000227391	6.67745
YLR097C	1.91375	1.18028e-05	0.000228744	6.78171
YLR009W	-4.12266	1.19782e-05	0.000231415	7.36014
YBL039C	-5.86806	1.22199e-05	0.000235348	7.41382
YMR309C	-2.4941	1.22966e-05	0.000236088	8.10873
YML056C	-4.45203	1.23592e-05	0.000236552	8.64525
YIR005W	2.04669	1.24433e-05	0.000237049	5.84774
YLR164W	3.60301	1.24621e-05	0.000237049	6.32231
YBR084C-A	-3.66228	1.25674e-05	0.000238242	9.99412
YOL086C	-3.89971	1.26135e-05	0.000238242	12.4288
YHR215W	-1.84118	1.26662e-05	0.000238242	6.08337
YML054C	1.95262	1.26795e-05	0.000238242	5.08951
YOR329W-A	4.29683	1.27237e-05	0.000238347	2.36564
YMR260C	-2.85031	1.28905e-05	0.000240739	8.24348
YLR333C	-3.555	1.29906e-05	0.00024126	8.47447
YJL217W	2.48561	1.30289e-05	0.00024126	7.59872
YOR391C	5.18795	1.3041e-05	0.00024126	2.35282
YEL066W	2.43808	1.30965e-05	0.00024126	7.00302
YBR181C	-3.86193	1.31141e-05	0.00024126	9.63007
YLR126C	2.02978	1.32086e-05	0.000242276	6.61306
YOL025W	1.91433	1.33201e-05	0.000243595	5.92103
YHR067W	1.71339	1.34488e-05	0.000244561	5.97134
YMR142C	-3.67512	1.34522e-05	0.000244561	10.1339
YHR030C	1.97444	1.35008e-05	0.000244722	7.86675
YJL173C	1.79494	1.35727e-05	0.000245303	7.0585
YDR076W	2.47042	1.36512e-05	0.000246001	6.1573
YGL205W	3.5302	1.37614e-05	0.000247264	4.66417
YCR012W	-3.62697	1.39784e-05	0.000250434	11.9598
YDR540C	3.73233	1.41122e-05	0.000251189	5.57175
YAL037W	2.66784	1.41291e-05	0.000251189	4.51648
snR39	-3.42109	1.41511e-05	0.000251189	2.88187
YJR124C	-2.3911	1.41989e-05	0.000251189	5.90758
YFR055W	2.55548	1.42244e-05	0.000251189	9.36423
YKL209C	2.19806	1.44508e-05	0.000254458	6.07333
YOR298W	3.99403	1.45486e-05	0.000255449	6.0169
YML113W	-2.96809	1.46746e-05	0.000256931	5.34649
YPL263C	-3.29051	1.48889e-05	0.000259944	6.63718
YCL031C	-1.79425	1.49838e-05	0.00026052	6.75582
YHR029C	3.02351	1.50392e-05	0.00026052	10.2451
YGR154C	3.68448	1.50776e-05	0.00026052	7.43463
YAL023C	-2.06909	1.5091e-05	0.00026052	8.48107
YDR091C	-2.9997	1.52383e-05	0.00026224	7.46337
YJR056C	-2.06202	1.52757e-05	0.00026224	4.83785
YDR429C	-2.31095	1.54192e-05	0.000263968	8.14159
YBL069W	-1.86151	1.54911e-05	0.000264241	4.94411
YGR044C	2.29365	1.55225e-05	0.000264241	5.82809
YNL062C	-4.43186	1.5569e-05	0.000264241	6.00231
YOL044W	1.7633	1.56067e-05	0.000264241	5.79177
YEL041W	2.29876	1.56877e-05	0.000264886	5.29934
YFR044C	2.14678	1.58602e-05	0.000265452	9.19562
YIR032C	4.31662	1.58681e-05	0.000265452	7.7847
YJR070C	-3.71341	1.58877e-05	0.000265452	7.69817
YGR162W	-3.06219	1.59581e-05	0.000265452	8.49948
YDR371C-A	7.35814	1.5963e-05	0.000265452	2.78052
YFL034C-A	-2.3892	1.59797e-05	0.000265452	7.74728
YOL138C	1.96903	1.61182e-05	0.000266561	7.10417
YJL191W	-3.02579	1.62032e-05	0.000266561	7.4337
YEL062W	1.69843	1.62861e-05	0.000266561	5.98842
YOR040W	1.94236	1.63128e-05	0.000266561	5.07328
YBL027W	-3.62816	1.63308e-05	0.000266561	10.435
YHR183W	-2.63779	1.64179e-05	0.000266561	10.1583
YEL026W	-3.32422	1.64275e-05	0.000266561	7.91098
HRA1	4.57525	1.64432e-05	0.000266561	4.03014
YGR090W	-3.1088	1.64493e-05	0.000266561	7.24607
YBR084W	-4.5544	1.6479e-05	0.000266561	7.6788
YOR100C	5.85017	1.66866e-05	0.000269214	8.36265
YGR271C-A	-2.57891	1.67714e-05	0.000269875	5.72101
YGR067C	2.61027	1.69228e-05	0.000271151	4.10227
YFR046C	1.66731	1.69387e-05	0.000271151	5.92795
YIL059C	1.69168	1.70633e-05	0.000272438	5.55991
YLR073C	-4.69246	1.71668e-05	0.000273382	5.50544
YMR107W	6.67672	1.7264e-05	0.000274222	6.6921
YNL244C	-2.43649	1.7437e-05	0.000276257	8.39624
YBR187W	-2.14856	1.75803e-05	0.000277555	7.67833
YER065C	2.57822	1.76089e-05	0.000277555	6.29685
YJL148W	-4.0232	1.7756e-05	0.000279158	7.16305
YGR118W	-2.76664	1.78023e-05	0.000279169	9.90704
YPR151C	2.74966	1.79001e-05	0.000279169	3.18972
YML093W	-4.18609	1.79104e-05	0.000279169	7.41147
YDL014W	-3.72104	1.79379e-05	0.000279169	8.80703
YGR021W	-1.80984	1.79835e-05	0.000279175	4.85333
YCL034W	2.15507	1.81232e-05	0.000279373	7.86318
YNR017W	-1.8348	1.81391e-05	0.000279373	7.45827
YNL151C	-3.58248	1.81651e-05	0.000279373	6.12813
YPL220W	-3.25708	1.81776e-05	0.000279373	9.1313
YDR190C	-1.94996	1.83209e-05	0.000280874	7.3625
YLR160C	5.84048	1.84629e-05	0.000282135	4.48872
YNL110C	-3.11372	1.84964e-05	0.000282135	6.92126
YDL238C	4.69223	1.85533e-05	0.000282135	7.67381
YNR074C	1.66429	1.85862e-05	0.000282135	6.96929
YKL151C	2.32495	1.87539e-05	0.0002837	6.46979
YGR211W	-3.13683	1.87813e-05	0.0002837	7.21974
YPR041W	-2.66603	1.88477e-05	0.000284005	8.04587
YLR441C	-3.40624	1.90346e-05	0.000285405	10.4245
YNL068C	-1.80195	1.90625e-05	0.000285405	6.08047
YDL164C	-1.76696	1.91662e-05	0.000285405	5.749
YNL293W	2.23855	1.91762e-05	0.000285405	6.72812
YIL103W	-3.9323	1.92182e-05	0.000285405	5.24642
YJR138W	1.9132	1.92184e-05	0.000285405	7.19263
YML053C	-1.71742	1.93402e-05	0.000286522	5.03585
YNL175C	-3.79562	1.95086e-05	0.000287437	6.93176
YHR174W	-3.49877	1.95473e-05	0.000287437	12.9296
YMR046W-A	3.30641	1.96596e-05	0.000287437	3.99785
YPR193C	2.67827	1.96853e-05	0.000287437	3.21465
YGR038C-B	1.92601	1.97439e-05	0.000287437	7.25974
YNL002C	-3.35154	1.97586e-05	0.000287437	7.4377
YMR280C	2.55467	1.9763e-05	0.000287437	3.53748
YNL116W	1.82617	1.98605e-05	0.000287437	7.07296
YLR227W-B	2.39314	1.98741e-05	0.000287437	5.66706
YDL228C	-4.37263	1.99389e-05	0.000287437	1.51954
YGR140W	-1.72714	1.99451e-05	0.000287437	5.56543
YCR087C-A	-4.10991	1.99882e-05	0.000287437	5.0756
YKL188C	3.06259	2.00082e-05	0.000287437	6.44533
YDR515W	-1.71154	2.02244e-05	0.000289389	4.75534
YGL185C	2.05634	2.0238e-05	0.000289389	4.73583
YOR361C	-2.25406	2.03324e-05	0.000290067	8.18658
YER188W	2.23833	2.05984e-05	0.000292543	4.55498
YGR123C	-3.64081	2.06377e-05	0.000292543	6.12706
YAL038W	-3.14403	2.06735e-05	0.000292543	12.4239
YLR311C	5.65928	2.06959e-05	0.000292543	2.35195
YGL225W	-1.93778	2.07502e-05	0.00029264	8.20674
YNL125C	2.16954	2.08603e-05	0.000293102	7.1086
YJL089W	3.89458	2.08781e-05	0.000293102	5.15404
YIR017C	2.49441	2.09788e-05	0.000293847	7.43039
YHR047C	2.03813	2.12072e-05	0.000296372	7.828
YJL124C	-1.81866	2.12743e-05	0.000296636	6.69659
YEL058W	1.82902	2.15539e-05	0.000299507	8.39872
YGR028W	1.67496	2.15773e-05	0.000299507	6.5209
YDR461W	3.57939	2.16472e-05	0.000299802	3.73899
YLR183C	-2.8926	2.1851e-05	0.000301946	5.59375
YOR355W	-1.93649	2.20559e-05	0.000303849	7.38822
YBR296C	-4.71451	2.21184e-05	0.000303849	6.6998
YBR154C	-2.29117	2.21367e-05	0.000303849	7.11856
YDR101C	-4.02931	2.24053e-05	0.000306853	7.17657
YGL226C-A	-1.49378	2.24825e-05	0.000307228	6.08683
YLL057C	2.01921	2.26781e-05	0.000307427	4.15137
YEL003W	-1.68386	2.26901e-05	0.000307427	6.17932
YMR255W	1.59724	2.26932e-05	0.000307427	7.15152
YDR046C	-2.50127	2.26966e-05	0.000307427	8.01375
YOR108W	-2.26444	2.27618e-05	0.000307634	7.99241
YDL239C	4.05746	2.2944e-05	0.000309418	7.48933
YPR124W	-1.56472	2.31473e-05	0.000311143	5.61199
RME3	2.50343	2.31729e-05	0.000311143	4.05405
YKR096W	1.7268	2.35478e-05	0.000314805	7.49248
YNL046W	1.48102	2.35478e-05	0.000314805	6.56216
YPL214C	1.6654	2.36376e-05	0.000315322	6.60012
YOR019W	1.58364	2.37763e-05	0.000315864	5.35648
YDR033W	-3.32764	2.37807e-05	0.000315864	9.31641
YLR312C	5.51546	2.39837e-05	0.000317874	5.76587
YBR247C	-4.2406	2.40374e-05	0.000317902	6.43866
YDR299W	-3.49449	2.41285e-05	0.000318424	6.65756
YBR030W	-1.8947	2.43133e-05	0.000319652	5.71033
YIL027C	-1.46749	2.43253e-05	0.000319652	5.66466
YPL075W	-1.68708	2.44259e-05	0.000320291	7.33172
YJR143C	-1.72352	2.4604e-05	0.000321942	8.07089
YML098W	1.64313	2.46726e-05	0.000322155	7.11714
YMR226C	2.27777	2.48242e-05	0.00032345	9.50345
YMR079W	-1.73873	2.49e-05	0.00032368	6.8968
YKL183W	-1.74968	2.49956e-05	0.00032368	5.52539
YBR033W	2.48143	2.49994e-05	0.00032368	3.27918
YNL248C	-4.64876	2.51327e-05	0.000324273	7.11014
YDR287W	1.64023	2.51505e-05	0.000324273	6.39423
YOL052C	-2.48894	2.52694e-05	0.000325126	6.13027
YBR235W	1.99129	2.54594e-05	0.000326888	8.1879
YGL078C	-4.92167	2.55488e-05	0.000327354	7.53283
YLR287C	-2.06807	2.57563e-05	0.00032875	5.68007
YBL009W	-2.05734	2.5775e-05	0.00032875	5.35804
YFR008W	1.83837	2.58282e-05	0.00032875	4.95829
YOR366W	2.58519	2.58711e-05	0.00032875	3.68226
YPL223C	3.0785	2.60368e-05	0.000329877	3.1614
YKR059W	-2.42031	2.60668e-05	0.000329877	8.67754
YCR073C	2.54918	2.64166e-05	0.000333023	7.00124
YPL119C	1.86131	2.64235e-05	0.000333023	4.4112
YBL031W	-2.16939	2.6558e-05	0.000334035	4.54086
YJR101W	-1.73433	2.67305e-05	0.000335519	5.58139
YPL150W	1.5644	2.69383e-05	0.00033693	7.14266
YDL208W	-3.0617	2.69522e-05	0.00033693	7.86753
YML064C	-1.67598	2.71215e-05	0.000337996	4.87114
YBR267W	-3.28802	2.71471e-05	0.000337996	6.57349
YER160C	1.68051	2.74064e-05	0.000340536	4.77905
YHR128W	-2.53541	2.78444e-05	0.000344758	7.25946
YKL009W	-3.93189	2.78581e-05	0.000344758	7.57099
YEL064C	1.80115	2.79568e-05	0.000345286	6.05412
YOR276W	-1.5442	2.81397e-05	0.00034685	7.28948
YLL008W	-4.34315	2.83262e-05	0.000348452	7.33671
YNR029C	-1.90408	2.84555e-05	0.000348805	5.48213
YDR050C	-2.81856	2.84681e-05	0.000348805	11.5951
YLR351C	1.93115	2.85532e-05	0.000349153	8.49153
YNL112W	-5.97444	2.88671e-05	0.000352038	8.81238
YHR142W	-1.59181	2.89034e-05	0.000352038	6.23387
YLR074C	-3.49413	2.91207e-05	0.000353986	7.21767
YLR409C	-4.28772	2.92638e-05	0.000354933	7.05036
YDR041W	1.53424	2.93138e-05	0.000354933	6.9247
YNL252C	-1.62287	2.95098e-05	0.000356605	5.23199
YML022W	-2.38173	2.96145e-05	0.000357171	6.73414
YBR029C	-2.54963	3.01873e-05	0.000362922	6.77126
YNL054W-B	2.75643	3.02091e-05	0.000362922	8.50203
YLR401C	-4.74447	3.03353e-05	0.000363307	6.57539
YDR087C	-3.52227	3.03591e-05	0.000363307	6.11693
YIL083C	1.94666	3.05312e-05	0.000364658	7.19215
YLR075W	-3.04041	3.07279e-05	0.00036514	11.0608
YOR168W	-2.36526	3.07441e-05	0.00036514	8.05763
YOR206W	-3.19972	3.07845e-05	0.00036514	7.38125
YPL093W	-4.43336	3.08085e-05	0.00036514	8.32616
YHR193C	-1.94645	3.0936e-05	0.000365731	9.13779
YNL182C	-3.6241	3.09771e-05	0.000365731	6.2336
YMR043W	-1.56902	3.11508e-05	0.000367079	6.59293
YJR072C	-2.91966	3.14155e-05	0.000368407	6.50528
YPL081W	-4.60588	3.14242e-05	0.000368407	8.42242
YOR035C	1.66536	3.15656e-05	0.000368407	6.49413
YKR015C	3.52609	3.16168e-05	0.000368407	2.18682
YDR324C	-3.65914	3.16371e-05	0.000368407	7.13145
YDR126W	2.46425	3.16517e-05	0.000368407	5.94683
YMR049C	-4.10919	3.1682e-05	0.000368407	7.17547
YJR036C	2.31347	3.19852e-05	0.000371005	5.08651
YGR159C	-4.06375	3.20874e-05	0.000371005	9.57146
YOL077C	-3.85502	3.21009e-05	0.000371005	7.06164
YHR022C	2.46309	3.21461e-05	0.000371005	3.17113
YPR058W	1.84968	3.22686e-05	0.000371322	8.43377
YOR020W-A	1.98669	3.23299e-05	0.000371322	5.9947
YDL150W	-2.74479	3.23543e-05	0.000371322	6.56751
YCL002C	-1.80678	3.24474e-05	0.000371697	5.48861
YML060W	-1.7781	3.26491e-05	0.000373314	4.61075
YGL249W	2.77215	3.28554e-05	0.000374892	3.41808
YBR192W	-1.55885	3.29848e-05	0.000374892	5.4645
YAL025C	-4.48878	3.30241e-05	0.000374892	7.44038
YHR149C	-1.62318	3.30304e-05	0.000374892	6.00786
YDR060W	-3.61456	3.31086e-05	0.000375089	7.91393
YLR004C	3.62404	3.31941e-05	0.000375368	4.56975
YOL103W	-1.52457	3.3457e-05	0.000377317	7.13855
YDR533C	1.98899	3.3489e-05	0.000377317	7.2339
YBL005W-B	1.95096	3.35634e-05	0.000377466	6.42316
YKR101W	1.47043	3.36371e-05	0.000377606	5.59338
YER174C	1.67725	3.40625e-05	0.000381686	6.89675
YIL131C	-2.45233	3.41922e-05	0.000382443	5.31116
YPL047W	1.59082	3.4293e-05	0.000382877	6.17984
YML082W	-2.49094	3.44187e-05	0.000383585	6.21328
YBR143C	-1.92632	3.46015e-05	0.000383787	8.71964
YOL107W	1.75021	3.46122e-05	0.000383787	5.74495
YMR243C	-1.93775	3.4712e-05	0.000383787	8.03525
YDR184C	-4.46578	3.47497e-05	0.000383787	5.21261
YCR072C	-3.49398	3.48177e-05	0.000383787	6.03092
YJR096W	2.12066	3.48329e-05	0.000383787	5.88797
YLR193C	1.514	3.48728e-05	0.000383787	6.44668
YKL027W	-1.94092	3.51094e-05	0.000385703	6.09762
YMR146C	-2.07138	3.55956e-05	0.000390098	8.46779
YBR220C	-1.35469	3.56772e-05	0.000390098	6.01571
YDR083W	-3.82798	3.56994e-05	0.000390098	6.29763
YEL034W	-2.2812	3.60301e-05	0.000392215	9.81911
YBL048W	4.50575	3.60902e-05	0.000392215	1.72853
YKL082C	-2.60678	3.61386e-05	0.000392215	7.47334
YER184C	2.04116	3.61477e-05	0.000392215	5.55289
YKL162C-A	3.04198	3.65043e-05	0.000395388	2.5196
YDR331W	-1.39139	3.67167e-05	0.000396703	6.03166
YLR149C	3.25233	3.681e-05	0.000396703	5.23786
YFR001W	-2.223	3.68187e-05	0.000396703	6.31925
YCR068W	1.89417	3.70148e-05	0.00039807	6.58291
YHR072W-A	-2.48555	3.70748e-05	0.00039807	7.41226
YLR196W	-3.56781	3.73888e-05	0.000400743	7.55289
YGL005C	1.51809	3.75874e-05	0.000402172	7.25597
YLL024C	-2.38544	3.782e-05	0.00040396	10.7755
YDL032W	4.55057	3.80306e-05	0.000404508	1.56419
YHR107C	-1.44011	3.8083e-05	0.000404508	6.51234
YGL068W	-1.36432	3.81351e-05	0.000404508	6.49123
YBL028C	-3.06381	3.81849e-05	0.000404508	6.40772
YMR104C	1.85265	3.81995e-05	0.000404508	6.31822
YJR004C	1.52537	3.83444e-05	0.000405346	6.26161
YJR078W	2.76053	3.86181e-05	0.000407171	3.75074
YNL145W	2.6526	3.86492e-05	0.000407171	3.25441
YHR106W	1.35848	3.8869e-05	0.000408128	6.10737
YAL059W	-3.77478	3.88725e-05	0.000408128	5.99932
YLR001C	1.77661	3.90521e-05	0.0004089	6.83403
YDR093W	-1.43965	3.9135e-05	0.0004089	6.98984
YKL143W	-4.35357	3.91646e-05	0.0004089	6.56108
YMR195W	3.37944	3.92114e-05	0.0004089	8.61501
YDR496C	-3.74883	3.92812e-05	0.000408935	7.30656
YBR079C	-2.16522	3.94852e-05	0.000410031	8.59985
YDR530C	2.13345	3.95195e-05	0.000410031	6.81588
YOR337W	1.96567	3.96238e-05	0.000410423	8.28688
YOL041C	-2.92982	3.99138e-05	0.000412733	7.29777
YFL022C	-2.15589	4.00874e-05	0.000413833	7.82466
YMR252C	1.39784	4.03036e-05	0.000415369	5.39645
YLL063C	1.6261	4.04835e-05	0.000415857	4.86709
YEL033W	-2.89766	4.04858e-05	0.000415857	4.24398
YGR260W	-1.61564	4.06175e-05	0.000416194	7.33528
YIL064W	-3.98523	4.06537e-05	0.000416194	5.03468
YDR045C	-2.0578	4.0751e-05	0.000416498	5.38702
YHR075C	1.55081	4.09043e-05	0.000417038	4.58658
YHR216W	-2.75734	4.09456e-05	0.000417038	8.58848
YAL063C	1.69123	4.10068e-05	0.000417038	4.65645
YDR453C	3.9498	4.11288e-05	0.000417414	6.23698
YGR161W-C	2.042	4.11793e-05	0.000417414	5.0187
YLL056C	2.38585	4.13234e-05	0.000417603	3.79993
YDR461C-A	1.80888	4.13581e-05	0.000417603	5.13218
YLR175W	-3.23292	4.14011e-05	0.000417603	8.90234
YDR156W	-1.56623	4.15731e-05	0.000418016	5.31061
YBR161W	-1.91185	4.16302e-05	0.000418016	4.84283
YHR148W	-2.77446	4.16455e-05	0.000418016	5.60767
YGR182C	1.47622	4.1909e-05	0.000419976	5.30049
YNL335W	3.23472	4.20444e-05	0.000420648	2.68619
YLR063W	-3.18035	4.21134e-05	0.000420656	4.75143
YLL060C	1.6926	4.22242e-05	0.000420903	4.87621
YLR449W	-3.20194	4.23338e-05	0.000420903	6.9095
YNL016W	-1.55232	4.2343e-05	0.000420903	7.97684
YMR077C	1.43862	4.2457e-05	0.000421357	5.71006
YPL188W	1.89202	4.25642e-05	0.000421741	7.50807
YDL067C	2.45886	4.26828e-05	0.000421805	9.34416
YPL246C	-1.68269	4.27075e-05	0.000421805	6.81515
YOL091W	2.30315	4.31685e-05	0.000425676	5.27032
YDL205C	-1.85353	4.33002e-05	0.000425682	6.53069
YMR310C	-2.71416	4.33149e-05	0.000425682	5.73934
YDR234W	-2.21443	4.33787e-05	0.000425682	9.0724
YPR046W	1.71361	4.3507e-05	0.000425682	5.16949
YGR023W	1.85385	4.35145e-05	0.000425682	6.02011
YMR078C	-1.49483	4.37758e-05	0.000427317	5.44598
snR63	-3.8388	4.38202e-05	0.000427317	3.3013
YKL103C	4.30286	4.39683e-05	0.000428084	9.46981
YOL112W	1.42674	4.42091e-05	0.000429524	7.33281
YDR131C	1.42211	4.42557e-05	0.000429524	5.3933
YNL166C	-1.39822	4.44145e-05	0.000430387	6.2781
YJR119C	1.89369	4.45487e-05	0.00043101	5.17335
YPL142C	-4.34711	4.4667e-05	0.000431477	1.63946
YKL168C	1.38437	4.50833e-05	0.000434817	6.15012
YLR197W	-3.55941	4.53786e-05	0.000436982	8.81687
YDR391C	1.73562	4.55379e-05	0.000437832	6.17884
YKL220C	1.58177	4.56929e-05	0.000438638	4.69756
YDR417C	-3.01865	4.60563e-05	0.000441439	2.58302
YDR080W	2.52201	4.63027e-05	0.000442309	7.94605
YBR105C	1.5923	4.64376e-05	0.000442309	8.12548
YHL016C	4.14843	4.64444e-05	0.000442309	8.72333
YLR344W	-2.85097	4.64777e-05	0.000442309	9.08195
YDL085W	4.83583	4.65059e-05	0.000442309	5.76544
YDR272W	1.4186	4.67796e-05	0.000444226	7.06745
YJL077C	2.42887	4.69956e-05	0.000445591	3.23349
YJL155C	1.82148	4.71499e-05	0.000446367	6.06671
YBR068C	-2.12858	4.72225e-05	0.000446368	9.021
YNL004W	1.76082	4.74775e-05	0.000448092	9.17573
YOR140W	-1.42442	4.7562e-05	0.000448203	6.23566
YDR210C-D	2.66393	4.76845e-05	0.000448671	5.16314
YCR018C	3.17463	4.78715e-05	0.000449744	4.54073
YPR133W-A	-1.34569	4.79542e-05	0.000449836	6.82987
YKL099C	-2.61075	4.81444e-05	0.000450094	5.90667
YKL113C	-1.51317	4.81704e-05	0.000450094	6.32166
YMR103C	1.79904	4.82009e-05	0.000450094	4.54563
YCL054W	-3.12639	4.83149e-05	0.000450476	7.56561
YJL134W	-1.53967	4.87565e-05	0.000453244	6.26874
YER006W	-3.67875	4.87893e-05	0.000453244	7.38831
YPL063W	-1.39738	4.88324e-05	0.000453244	7.45662
YDL049C	-1.52344	4.89956e-05	0.000454075	5.43435
YLL031C	-1.37184	4.90738e-05	0.000454117	6.68958
YOR073W	-2.85579	4.91526e-05	0.000454165	4.94094
YJL188C	-4.21299	4.93269e-05	0.000455093	2.74815
YER045C	1.48559	4.94641e-05	0.000455676	5.4322
YML055W	-1.30835	4.96904e-05	0.000456382	5.73015
YER010C	1.63795	4.97857e-05	0.000456382	6.61361
YDL033C	-1.62585	4.98149e-05	0.000456382	4.39391
YEL036C	-1.53729	4.98369e-05	0.000456382	7.46764
YOR011W	1.44711	5.02938e-05	0.000459882	6.75793
YDR449C	-3.4358	5.04298e-05	0.000460443	6.01314
YGR109C	-3.85014	5.08216e-05	0.000463333	3.37155
YBR087W	-1.43092	5.12791e-05	0.000466814	5.40025
YOR208W	1.52939	5.13669e-05	0.000466923	6.23789
YLR094C	1.57063	5.16885e-05	0.000468347	6.61747
YDR001C	1.82027	5.1762e-05	0.000468347	8.24556
YMR093W	-2.67328	5.1784e-05	0.000468347	6.39771
YEL055C	-2.55856	5.18274e-05	0.000468347	7.04777
YOR101W	-3.01625	5.22796e-05	0.000471741	6.88515
YIL046W	1.45241	5.27683e-05	0.000475455	7.28299
YEL022W	-1.3449	5.29384e-05	0.000476291	6.68346
YOR224C	-2.4391	5.30168e-05	0.000476301	7.17435
YGR169C-A	-2.27367	5.34607e-05	0.000479107	6.24253
YPR007C	3.15579	5.34846e-05	0.000479107	1.79297
YJL056C	1.55161	5.35713e-05	0.000479188	6.68952
YBR227C	1.57875	5.36713e-05	0.000479385	7.22824
YGL120C	-3.94523	5.43217e-05	0.000484113	7.39081
YFL001W	-2.57247	5.43576e-05	0.000484113	5.41287
YNR065C	2.39814	5.45841e-05	0.000485428	7.9194
YPL050C	-1.43515	5.47315e-05	0.000486038	7.67573
YOR315W	-2.19955	5.49633e-05	0.000486377	7.35521
YLR222C	-3.72803	5.499e-05	0.000486377	6.78126
YNL209W	-2.9082	5.50065e-05	0.000486377	10.229
YKR081C	-3.71106	5.51623e-05	0.000487056	6.86891
YMR181C	1.8973	5.55641e-05	0.000489902	6.43829
YNR064C	3.23025	5.56896e-05	0.000490307	2.40643
YKR004C	1.61452	5.64089e-05	0.000495896	5.68112
YEL053W-A	-5.46687	5.65242e-05	0.000495896	1.75484
YJL200C	-2.65302	5.66007e-05	0.000495896	9.63785
YMR178W	1.4503	5.66915e-05	0.000495896	7.18513
tD(GUC)N	2.71421	5.67463e-05	0.000495896	3.36779
YMR296C	-1.42896	5.68088e-05	0.000495896	7.51333
YJR067C	-1.68581	5.68876e-05	0.000495896	4.15099
YIL092W	2.16661	5.70113e-05	0.000496272	6.99331
YJL147C	1.30757	5.74594e-05	0.000499369	5.37845
YPR010C	-4.03304	5.75527e-05	0.000499369	8.68013
YCR016W	-2.61341	5.76101e-05	0.000499369	6.18271
YOL117W	1.91881	5.7766e-05	0.000499865	5.65111
YEL017C-A	-1.687	5.79118e-05	0.000499865	8.12081
YJL122W	-3.41937	5.79496e-05	0.000499865	6.59932
YGR080W	1.7673	5.79918e-05	0.000499865	7.00808
YNL075W	-2.64398	5.81196e-05	0.000500267	6.32618
YHL023C	1.38844	5.82442e-05	0.000500469	7.43124
YIL111W	2.34118	5.83265e-05	0.000500469	7.5847
YHR204W	-1.47118	5.83867e-05	0.000500469	6.35252
YPR137W	-2.20121	5.85169e-05	0.000500889	6.9629
YFL042C	1.61658	5.87235e-05	0.000501316	6.5572
YGL248W	2.50268	5.87296e-05	0.000501316	7.0714
YNR068C	3.79489	5.8889e-05	0.000501982	8.15305
YOL128C	2.48095	5.92125e-05	0.000502979	5.96497
YGL029W	-3.70272	5.92543e-05	0.000502979	6.11125
YNL009W	1.44275	5.93497e-05	0.000502979	4.73571
YDL200C	1.69003	5.93627e-05	0.000502979	5.52757
YGR063C	-1.41867	5.94601e-05	0.000502979	5.61416
YDR384C	-2.4343	5.94956e-05	0.000502979	7.57786
YMR076C	-1.29544	5.98023e-05	0.00050408	5.77242
YDL054C	2.72414	5.98097e-05	0.00050408	8.60609
YLR017W	-2.05896	5.99252e-05	0.00050408	6.42857
snR86	-1.52463	5.99996e-05	0.00050408	5.69223
YCL058W-A	-3.30694	6.00457e-05	0.00050408	3.85656
YCR101C	2.55667	6.01166e-05	0.00050408	4.96675
YLR129W	-3.62977	6.03381e-05	0.00050525	7.27197
YEL012W	2.04761	6.06993e-05	0.000507584	6.01311
YGL104C	2.89145	6.08153e-05	0.000507866	5.84198
YJL161W	3.15484	6.13075e-05	0.000509083	4.37534
YDL024C	2.52365	6.1352e-05	0.000509083	2.9324
YOR134W	3.8642	6.13983e-05	0.000509083	2.80605
YBR042C	-1.3538	6.14585e-05	0.000509083	5.69095
YPR057W	1.33201	6.15012e-05	0.000509083	6.91613
YNL246W	-1.72675	6.15131e-05	0.000509083	6.2677
YJL199C	2.1688	6.15394e-05	0.000509083	4.98382
YBR007C	1.3404	6.16549e-05	0.000509254	6.66219
YLR189C	1.79716	6.17252e-05	0.000509254	7.58882
YBL089W	1.4681	6.18157e-05	0.000509319	6.59912
YPR066W	1.76443	6.2027e-05	0.000510377	4.39579
YKL166C	-1.56549	6.27212e-05	0.000514742	5.25352
YDR334W	-1.2548	6.27246e-05	0.000514742	6.80064
YML065W	-1.50682	6.29297e-05	0.000515739	6.0331
YJL138C	-2.09884	6.30401e-05	0.000515958	9.00333
YPL071C	1.23473	6.32355e-05	0.000516871	5.95266
YCR007C	2.00718	6.34601e-05	0.00051802	4.07856
YDL142C	1.83404	6.35633e-05	0.000518175	6.03541
YGR190C	3.7178	6.3664e-05	0.000518311	2.20407
YBR157C	2.02205	6.40052e-05	0.000520401	3.3637
YAL061W	2.73032	6.43466e-05	0.000522043	5.27287
YLR455W	-1.42477	6.43765e-05	0.000522043	5.70608
YOR217W	-1.27327	6.45358e-05	0.000522545	6.62041
YHR103W	-1.31717	6.4608e-05	0.000522545	6.2723
YMR323W	4.36235	6.47226e-05	0.000522759	1.39541
YBR081C	1.38913	6.49107e-05	0.000522759	7.47321
YPR143W	-2.43906	6.49614e-05	0.000522759	6.58953
YER119C-A	3.42824	6.49738e-05	0.000522759	2.16841
YOL133W	1.30382	6.52507e-05	0.000523405	6.4103
YOR232W	-1.35461	6.53521e-05	0.000523405	7.45179
YKL155C	1.65558	6.53746e-05	0.000523405	7.05597
YML115C	-1.40487	6.53938e-05	0.000523405	6.67813
YDR207C	-1.92374	6.59048e-05	0.000526063	5.29161
YMR026C	1.6145	6.59675e-05	0.000526063	6.85313
YPL185W	3.19491	6.59819e-05	0.000526063	2.2165
YPL052W	1.50469	6.64115e-05	0.000526234	6.54402
YIL073C	1.97382	6.64685e-05	0.000526234	3.34006
YKL197C	1.3741	6.64696e-05	0.000526234	6.62511
YDL148C	-4.31473	6.64878e-05	0.000526234	7.08003
YLR054C	2.65139	6.6505e-05	0.000526234	3.12819
YGR288W	1.95228	6.65157e-05	0.000526234	5.31502
YLR362W	1.20847	6.665e-05	0.000526621	6.29352
YDR425W	1.65826	6.6889e-05	0.000527226	6.40533
YHR202W	2.25015	6.68977e-05	0.000527226	6.4179
YKL217W	2.03789	6.71055e-05	0.00052771	3.42811
YGR173W	-2.48972	6.71304e-05	0.00052771	6.00482
snR84	-3.15679	6.73133e-05	0.000528049	3.08999
YHR068W	-1.65389	6.74021e-05	0.000528049	7.63543
YNL181W	-1.56495	6.74305e-05	0.000528049	5.47937
YKR005C	1.75713	6.75682e-05	0.000528455	4.29414
YKL084W	2.00952	6.77544e-05	0.00052924	6.11249
YJR002W	-2.75498	6.79762e-05	0.000529316	7.2889
YGR103W	-4.3775	6.80054e-05	0.000529316	8.16698
YDL051W	-2.73569	6.80218e-05	0.000529316	7.32008
YKL068W-A	-2.66234	6.84544e-05	0.000531262	6.02294
YMR292W	-1.51839	6.85015e-05	0.000531262	5.62511
YMR070W	-1.46307	6.86064e-05	0.000531262	6.39123
YGL156W	3.5101	6.86166e-05	0.000531262	6.20658
YDL215C	1.93391	6.88087e-05	0.000531489	7.89051
YLR056W	-1.797	6.88185e-05	0.000531489	8.24003
YHR196W	-2.82652	6.94335e-05	0.000535568	7.10539
YOR078W	-2.1822	7.00377e-05	0.000538993	6.42875
YLL011W	-2.35911	7.00524e-05	0.000538993	6.3885
YGL154C	1.94185	7.06211e-05	0.000542355	5.98701
YDL170W	3.01539	7.06654e-05	0.000542355	9.32976
YBR241C	1.88998	7.08302e-05	0.000542729	6.54567
YNL015W	2.56353	7.09085e-05	0.000542729	6.96468
YNL065W	-1.88085	7.09783e-05	0.000542729	7.05028
YHR122W	2.24526	7.12375e-05	0.000544036	8.153
YPL057C	-1.2443	7.17215e-05	0.000546554	6.75156
YGL188C-A	-3.00828	7.17747e-05	0.000546554	4.01604
YLR339C	-4.26975	7.18333e-05	0.000546554	0.877604
YGL162W	-1.68043	7.21514e-05	0.000548298	3.95397
YGR183C	1.68916	7.25161e-05	0.000549317	6.86073
YJR118C	-1.30151	7.25493e-05	0.000549317	6.14138
YER070W	-3.14761	7.2553e-05	0.000549317	8.52127
YHR044C	1.43161	7.31447e-05	0.000553117	4.86741
YDR315C	2.33249	7.33263e-05	0.000553811	5.5358
YOR359W	-2.69063	7.36483e-05	0.000555562	6.23361
YPL226W	-2.80726	7.39643e-05	0.000557081	8.91001
YLR251W	2.8576	7.40304e-05	0.000557081	4.54437
YHL017W	-1.43546	7.421e-05	0.000557751	5.82074
YDR152W	-1.74659	7.43991e-05	0.000558231	6.68422
YHR005C-A	-1.3397	7.44549e-05	0.000558231	7.47546
YAL015C	1.28065	7.5049e-05	0.00056154	6.04244
YML080W	-1.57598	7.50785e-05	0.00056154	5.46886
YDR289C	-1.32011	7.53377e-05	0.000562796	5.3164
YGR280C	-3.14402	7.56352e-05	0.000564334	7.29242
YGL045W	1.33797	7.5765e-05	0.000564619	5.47332
YNL186W	-2.3683	7.62094e-05	0.000567245	7.47823
YHR015W	2.41672	7.63627e-05	0.0005677	3.59536
YKL096C-B	2.63372	7.65252e-05	0.000568223	2.33024
YER025W	-2.06919	7.67973e-05	0.000569557	8.14998
YLL047W	4.63296	7.70596e-05	0.000570611	1.11705
YDL169C	4.25465	7.71246e-05	0.000570611	6.22884
YJR019C	1.69107	7.74262e-05	0.000572156	5.66485
YPL031C	1.65586	7.76229e-05	0.000572922	7.69576
YPR170C	2.41382	7.80802e-05	0.000575608	2.59552
YDR245W	-1.41504	7.83395e-05	0.000575747	7.60551
YMR127C	-1.58443	7.84641e-05	0.000575747	4.63385
YIL026C	1.36826	7.85483e-05	0.000575747	7.11937
YNL014W	1.43643	7.8585e-05	0.000575747	5.04806
YPR065W	-1.82079	7.86496e-05	0.000575747	7.53584
YDR317W	3.25934	7.86596e-05	0.000575747	3.17749
YOL014W	-1.4655	7.88563e-05	0.000576502	4.73031
YNL294C	1.48609	8.00414e-05	0.000584473	7.62076
YER036C	-2.29345	8.04014e-05	0.00058581	8.98025
YJL115W	-1.50443	8.04146e-05	0.00058581	6.23303
YHR154W	-1.51177	8.06112e-05	0.000586112	5.5595
YOR372C	-1.81936	8.07263e-05	0.000586112	5.88528
YPL257W	1.4747	8.07413e-05	0.000586112	4.47492
YGL171W	-3.42353	8.08803e-05	0.000586212	6.29871
YBR017C	-1.69186	8.09454e-05	0.000586212	7.03124
YER175W-A	3.29551	8.12855e-05	0.000587984	2.96883
YGL111W	-2.84266	8.15494e-05	0.000589201	6.64017
YOR221C	2.04769	8.1816e-05	0.000590436	7.67957
YER043C	-2.1626	8.2101e-05	0.000590945	9.84237
YMR106C	1.6776	8.23025e-05	0.000590945	5.58171
YGL039W	1.1838	8.23551e-05	0.000590945	6.47715
YER066W	1.72875	8.24105e-05	0.000590945	3.99592
YNL242W	1.65197	8.24613e-05	0.000590945	6.49352
YOR178C	3.58316	8.24619e-05	0.000590945	3.08783
YGR122C-A	2.0962	8.26529e-05	0.000591626	2.91072
tN(GUU)N1	3.89301	8.28452e-05	0.000592315	2.51101
YHR113W	1.48023	8.29999e-05	0.000592445	7.44983
YBR186W	4.10096	8.30558e-05	0.000592445	1.698
YCL049C	1.96593	8.3503e-05	0.000594947	6.32733
YOL020W	-1.49425	8.36841e-05	0.000595549	7.27298
YMR131C	-3.1272	8.38598e-05	0.000595973	7.96632
YIL019W	-3.25684	8.40317e-05	0.000595973	5.80578
YJL185C	2.03024	8.40896e-05	0.000595973	4.96293
YJL080C	-1.6054	8.42525e-05	0.000595973	8.34741
YLR221C	-2.68765	8.42604e-05	0.000595973	6.64804
YGR095C	-2.02316	8.43239e-05	0.000595973	5.73365
YDR359C	-1.58726	8.46416e-05	0.000597427	5.99517
YIL165C	2.81661	8.47848e-05	0.000597427	8.44652
YCR107W	1.29368	8.49093e-05	0.000597427	5.75905
YDR062W	-1.37325	8.49174e-05	0.000597427	7.85021
YGR019W	3.03103	8.53019e-05	0.000599447	8.74315
YDL095W	-1.45248	8.55962e-05	0.000600831	8.30908
YIL045W	1.72698	8.63577e-05	0.000605486	5.16032
YLR405W	-1.62061	8.65403e-05	0.000605894	5.5208
YOR006C	-2.03377	8.66124e-05	0.000605894	5.68257
YFR025C	1.72663	8.69913e-05	0.000607854	8.11876
YIR038C	2.03203	8.74126e-05	0.000610106	7.497
YNL101W	1.90656	8.75886e-05	0.000610643	8.64513
YLR356W	2.39412	8.77712e-05	0.000611225	6.95785
YKR021W	1.32032	8.80426e-05	0.000612423	7.15495
YPR020W	1.14687	8.87968e-05	0.000616211	6.14306
YBL054W	-3.72621	8.88349e-05	0.000616211	6.20734
YPL094C	-1.37087	8.88935e-05	0.000616211	7.2174
YNL102W	-1.23574	8.90141e-05	0.000616211	6.18035
YBR238C	-1.91175	8.90871e-05	0.000616211	6.23267
YDR454C	-1.59957	8.93824e-05	0.00061756	7.53109
YDL206W	1.68849	8.95549e-05	0.000618059	5.86898
YPL211W	-4.00544	8.97313e-05	0.000618584	6.34012
YMR128W	-3.85119	8.99763e-05	0.000619509	6.84187
YIL127C	-3.80934	9.00665e-05	0.000619509	5.75577
YGR203W	1.22402	9.04816e-05	0.000621661	5.47635
YDR465C	-3.70356	9.07086e-05	0.000621661	6.78747
YOR188W	-1.70762	9.07208e-05	0.000621661	5.83444
YER023C-A	2.6302	9.07829e-05	0.000621661	2.8744
snR128	-4.69893	9.09645e-05	0.000622214	0.73985
YBR034C	-2.14316	9.13265e-05	0.000623582	7.70314
YMR154C	1.57809	9.1461e-05	0.000623582	5.25785
YNL273W	-1.30543	9.14681e-05	0.000623582	5.10155
YNL132W	-3.98553	9.23908e-05	0.000629176	6.97089
YDL171C	1.93738	9.26724e-05	0.000630227	10.4061
YHR147C	-1.25527	9.27497e-05	0.000630227	5.22893
YOR202W	1.91358	9.28555e-05	0.000630252	9.01345
YMR179W	-1.37766	9.31165e-05	0.000631328	5.23988
YEL006W	1.23514	9.37378e-05	0.000634842	7.31353
YPR114W	-1.34526	9.40723e-05	0.000636408	6.70214
YPR044C	-3.48781	9.49229e-05	0.000641368	2.94163
YNL097C	-1.28918	9.50451e-05	0.000641368	5.04981
YLR346C	2.58993	9.5214e-05	0.000641368	3.29087
YBR166C	1.47059	9.52217e-05	0.000641368	7.29379
YDL043C	-1.49244	9.54226e-05	0.000642019	4.97932
YDL065C	-1.16991	9.55787e-05	0.000642368	6.08855
YBL052C	-1.20845	9.58308e-05	0.000643361	6.26952
YHR031C	-1.38898	9.63803e-05	0.000643783	5.47624
YOR341W	-3.89275	9.63908e-05	0.000643783	8.25129
YKL001C	-2.35717	9.64141e-05	0.000643783	8.90553
YJL127C-B	1.35239	9.64452e-05	0.000643783	6.34557
YEL068C	1.25196	9.6498e-05	0.000643783	5.50585
YDR180W	-1.51964	9.65205e-05	0.000643783	4.96363
YMR279C	2.88137	9.67068e-05	0.000644329	3.79139
YNL197C	-1.26947	9.68421e-05	0.000644533	6.67513
YMR135C	1.67599	9.70787e-05	0.000645411	7.72061
YMR090W	1.6107	9.79059e-05	0.000650209	6.07441
YGR285C	-1.95989	9.81578e-05	0.000651146	8.92532
YOR056C	-2.73047	9.82583e-05	0.000651146	6.74717
YKL156W	-2.1102	9.85003e-05	0.000652049	8.87563
YPL033C	4.90064	9.93504e-05	0.000656881	6.13607
YLL046C	3.37547	9.94434e-05	0.000656881	2.25106
YLR060W	-1.75527	9.98918e-05	0.000659136	8.49156
YKR105C	3.81524	0.000100416	0.000661888	1.43909
YNL063W	1.20036	0.000100597	0.000662371	5.59552
YKL060C	-2.5541	0.000100815	0.000663097	13.0377
YFL061W	2.90784	0.000101054	0.000663963	2.52157
YHR169W	-3.62195	0.00010142	0.000665654	6.01142
YOR376W-A	2.39104	0.000101581	0.000666002	3.2212
YLR262C-A	-1.45599	0.000101798	0.000666714	7.39965
YDR302W	-1.16233	0.000102071	0.000667795	5.51343
YNL311C	2.12302	0.000102812	0.000670504	7.73798
YGR033C	-1.2169	0.000102834	0.000670504	6.39923
YOR239W	-1.22084	0.000102976	0.000670504	7.49578
YML109W	-1.18656	0.000103113	0.000670504	5.28824
YBL015W	2.19252	0.000103176	0.000670504	6.8088
YIL166C	1.82356	0.000103312	0.000670504	3.37519
YGR083C	-1.69174	0.000103579	0.000670504	6.89424
YDL232W	-1.17545	0.000103729	0.000670504	5.87769
YGR079W	-2.0964	0.000103968	0.000670504	6.23829
YHR170W	-3.3093	0.000104255	0.000670504	7.44533
YBR297W	2.79899	0.000104321	0.000670504	5.64222
YIR021W	-1.24343	0.000104425	0.000670504	4.88784
YER122C	-1.40921	0.000104546	0.000670504	7.74108
YJR010W	-2.25044	0.000104608	0.000670504	8.71649
YLR172C	-1.84653	0.000104633	0.000670504	6.74198
YPL171C	2.10302	0.000104758	0.000670504	2.78119
YOR383C	1.29545	0.000104831	0.000670504	5.61925
YOR294W	-3.14865	0.000104834	0.000670504	6.77201
YEL060C	2.79646	0.000104878	0.000670504	9.59349
YDR073W	-1.15161	0.000104975	0.000670504	5.3873
YOR377W	1.3182	0.000104992	0.000670504	6.14032
YBR243C	-1.42058	0.000105049	0.000670504	6.18109
YKL078W	-4.36677	0.000105129	0.000670504	5.42962
YLR068W	-2.71609	0.00010517	0.000670504	5.54562
YIL028W	1.72717	0.000105205	0.000670504	3.63178
YLR363W-A	-2.75926	0.000105513	0.000671605	4.70181
YOL119C	2.86517	0.000105662	0.000671605	9.87332
YKL218C	2.61105	0.000105704	0.000671605	9.64274
YNL142W	4.40748	0.000105944	0.000672178	12.1054
YKR095W-A	-1.28602	0.000106013	0.000672178	4.74791
YDL243C	1.39391	0.000106217	0.000672184	4.54584
YLR100W	1.4182	0.000106241	0.000672184	7.88987
YPL148C	1.40122	0.000106341	0.000672184	4.46668
YAL007C	-1.32593	0.000106605	0.00067316	7.00565
YLR002C	-3.47461	0.000106805	0.000673365	6.32067
YJR131W	1.44052	0.000106931	0.000673365	6.47537
YOR272W	-3.72535	0.000107045	0.000673365	6.64971
YKL172W	-2.45783	0.000107158	0.000673365	7.88486
YFL021W	1.39905	0.000107279	0.000673365	7.469
tF(GAA)D	4.0717	0.000107293	0.000673365	1.67175
YMR287C	1.48388	0.000107946	0.000676582	6.35836
YER039C	2.38442	0.000108025	0.000676582	4.79125
YOL144W	-3.04761	0.000108291	0.000676945	5.71724
YMR169C	1.96283	0.000108302	0.000676945	4.66457
YDL122W	-1.57392	0.000108548	0.000677233	7.161
YHL026C	-1.48489	0.000108703	0.000677233	4.33716
YER127W	-2.44764	0.000108833	0.000677233	6.27058
YBR205W	-1.14911	0.000108877	0.000677233	6.28234
YDR014W-A	2.70968	0.000108932	0.000677233	1.91068
YBL085W	-1.23964	0.000109072	0.000677233	6.66341
YJR155W	2.88399	0.000109188	0.000677233	6.81715
YCL039W	1.36584	0.000109228	0.000677233	6.39924
YLL059C	1.96191	0.000109735	0.000679693	3.21413
YBR019C	2.79095	0.000110079	0.000681141	1.62581
YDL241W	-2.35904	0.000110579	0.00068234	3.63824
YGL234W	-2.8017	0.000110634	0.00068234	9.50422
YIL029C	1.34638	0.000110735	0.00068234	4.68736
YDR172W	-1.51085	0.000110788	0.00068234	8.51844
YDL037C	-4.206	0.000110826	0.00068234	4.89757
YPR104C	-1.24667	0.00011157	0.000686173	6.38107
YAR002C-A	-1.21079	0.000111672	0.000686173	7.46558
YIL101C	2.80278	0.000111833	0.000686482	3.14018
YMR316W	1.23523	0.000112014	0.000686905	5.84275
YCL052C	1.23467	0.000112381	0.000687231	6.60966
YDL157C	-1.67403	0.000112466	0.000687231	5.2855
YPL194W	1.35451	0.000112505	0.000687231	5.56738
YKL006C-A	-1.33146	0.000112513	0.000687231	5.28344
YJR110W	1.3722	0.000112687	0.000687611	6.48291
YER145C	-1.43206	0.000112865	0.00068786	7.64569
YOL019W	2.09245	0.00011295	0.00068786	8.42991
YLR064W	-1.23821	0.000113261	0.000688462	6.33942
YIR018W	1.11928	0.000113352	0.000688462	5.76817
YDR399W	-2.44833	0.000113384	0.000688462	8.56979
YOR080W	1.18818	0.000113505	0.000688518	6.43551
YNR015W	-2.00091	0.000113655	0.00068875	5.75855
YJL183W	-1.35282	0.000113797	0.000688928	7.05884
YOR046C	-1.62743	0.000114017	0.000689586	7.09286
YOR051C	-1.75864	0.000114497	0.000691807	7.18779
YDR121W	-1.62053	0.0001152	0.000695373	5.03952
YOR104W	1.35938	0.000115381	0.000695786	5.30012
YPL146C	-2.16573	0.000115931	0.000697625	7.00754
YDL153C	-4.36678	0.000115948	0.000697625	7.07154
YAL067C	1.33116	0.000116058	0.000697625	4.575
YDL159W	1.36761	0.000116248	0.000697625	5.97364
YOR363C	1.78739	0.000116252	0.000697625	7.4091
YPR006C	1.43145	0.000116841	0.000700479	4.66286
YDL066W	2.85766	0.000116987	0.000700674	11.8602
YML125C	-2.08188	0.000117154	0.000700989	7.62563
YJL210W	1.45933	0.000117649	0.000703266	6.54859
YGL070C	-1.28088	0.000118012	0.000704758	5.64741
YMR008C	1.71662	0.000120001	0.000715937	7.67702
YML123C	-1.73756	0.000120428	0.000717795	9.69339
YBR142W	-3.30878	0.000121006	0.000720539	6.66637
YCR008W	-1.29849	0.000122043	0.000726016	6.8967
YPR016C	-1.75745	0.000123038	0.00073123	7.88185
YLR297W	-1.6565	0.000123232	0.000731675	4.31322
YOR119C	-2.27025	0.000123602	0.000733164	6.27684
YCR098C	1.79592	0.000124132	0.000734772	3.47469
YMR196W	2.70425	0.000124225	0.000734772	7.57188
YHR127W	-1.33485	0.00012423	0.000734772	5.31346
YLR130C	-1.2773	0.000124383	0.000734781	7.70333
YMR095C	1.57316	0.000124498	0.000734781	8.29053
YMR019W	1.99791	0.00012459	0.000734781	8.1525
YPL183C	-2.48387	0.000125275	0.000737577	6.9022
YPL043W	-3.08447	0.000125303	0.000737577	7.44987
YJL111W	-1.30054	0.00012589	0.000740326	8.084
YMR117C	-1.79409	0.000126793	0.000744922	4.15253
YMR129W	-1.28061	0.000127425	0.000747925	7.01836
YOR041C	2.53087	0.000128011	0.000750649	2.1703
YLR293C	-1.63724	0.000128464	0.000751744	9.26718
YPR195C	1.9543	0.00012883	0.000751744	4.33142
YPR125W	-1.13874	0.000129008	0.000751744	6.48414
YHR037W	1.75685	0.000129014	0.000751744	7.9197
YIL042C	1.53316	0.000129054	0.000751744	6.1302
YHR074W	1.28579	0.000129155	0.000751744	7.84582
YDR051C	-1.10113	0.000129283	0.000751744	5.57915
YDR212W	-1.21972	0.000129298	0.000751744	7.63923
YLR216C	-1.40565	0.000129385	0.000751744	7.6011
YPL061W	-5.25265	0.000129418	0.000751744	9.30632
YER125W	-1.25346	0.000130042	0.000754662	7.83945
YPL132W	-1.27668	0.000130459	0.000756369	4.77786
YPL186C	1.70243	0.00013085	0.000757129	4.35537
YAL030W	1.48963	0.000131002	0.000757129	6.5452
YNL295W	1.15737	0.000131039	0.000757129	5.90385
YKR047W	-2.25738	0.000131082	0.000757129	3.18727
YBR018C	1.97477	0.000131466	0.000758638	2.96662
YKL165C	-1.16559	0.000131594	0.000758667	6.40239
YPR120C	-1.3559	0.000132244	0.000761364	4.87925
YGR145W	-3.80148	0.000132309	0.000761364	6.77003
YPL110C	1.36553	0.000132667	0.000762714	6.69915
YGL062W	3.95948	0.000132928	0.000763502	11.2004
YCR044C	-1.35047	0.000133321	0.000765043	5.83801
YFL045C	-1.38755	0.00013362	0.000766046	8.80571
YAL056W	1.2764	0.000133879	0.000766718	7.92833
YDL059C	1.0645	0.000134124	0.000766718	6.13673
YBR283C	-1.35616	0.000134152	0.000766718	8.73734
YPR003C	1.47224	0.000134235	0.000766718	6.37126
YJL110C	1.27932	0.000134496	0.000767235	6.97353
YJL025W	-2.00081	0.000134662	0.000767235	4.63124
YHR119W	-1.2787	0.000134699	0.000767235	6.26347
YGL259W	3.28128	0.000134983	0.000768142	2.40413
YJL101C	-1.39019	0.000135447	0.000770076	7.11444
YER119C	2.01048	0.000135806	0.000771347	7.36201
YOL010W	-2.86813	0.000135921	0.000771347	6.11445
YBL032W	-1.13135	0.000136077	0.000771518	6.95679
YLR180W	-2.22621	0.00013659	0.000773543	9.76764
YMR253C	1.68935	0.000136712	0.000773543	6.01569
YPL002C	1.16436	0.00013681	0.000773543	6.03018
YLR103C	-1.36148	0.000137217	0.000775131	4.67399
YLR347C	-1.33784	0.00013756	0.000776356	7.18889
YHL042W	1.95057	0.000138014	0.000777333	2.88216
YBR278W	1.06633	0.000138035	0.000777333	5.83387
YCR024C-A	-1.28086	0.000138111	0.000777333	7.90463
YPL222W	1.62677	0.000138447	0.000777705	5.51111
YOR005C	1.11493	0.000138503	0.000777705	5.30816
YGR161C	4.20916	0.000138556	0.000777705	8.50715
YFR022W	1.21428	0.000138824	0.00077799	5.42389
YMR012W	-1.47629	0.000138907	0.00077799	8.36569
YKL023W	1.76643	0.000139124	0.00077799	6.88799
YOL036W	1.24336	0.000139161	0.00077799	7.93243
YDL201W	-2.75887	0.000139238	0.00077799	5.83003
YKL061W	1.4826	0.000140211	0.000781889	5.15201
YOR301W	-1.10678	0.000140267	0.000781889	5.43381
YML061C	-1.09006	0.000140316	0.000781889	5.89837
YOR045W	-1.19476	0.000140547	0.000782451	6.2909
YMR042W	1.46879	0.000140671	0.000782451	6.20156
YAL054C	1.34899	0.00014083	0.000782631	4.57505
YPL082C	-1.39206	0.000141361	0.000784797	6.70746
YPR198W	1.40986	0.000141475	0.000784797	7.44795
YHR084W	-1.35885	0.0001417	0.00078534	5.09786
YMR221C	1.34046	0.000141931	0.000785911	7.84355
YKR090W	-1.70712	0.000142316	0.000787337	5.43334
YHR017W	1.17222	0.000143193	0.000790801	6.00127
YBR222C	1.15216	0.000143199	0.000790801	6.95262
YDR058C	1.18529	0.000143874	0.000793821	5.08821
YJR027W	2.01382	0.00014475	0.000797323	5.17721
YNL228W	2.46155	0.000144896	0.000797323	1.90316
YDL236W	1.35256	0.000144897	0.000797323	8.37504
YIL021W	-1.23452	0.000145974	0.000802532	6.82216
YDL039C	-3.42868	0.000146128	0.000802661	6.09574
YMR229C	-3.51557	0.000146299	0.000802885	7.95277
YKL096W	-1.63999	0.000146944	0.000805706	6.42068
YOR116C	-2.12119	0.000147183	0.0008063	7.37473
YFR006W	1.28759	0.000147322	0.000806346	7.83738
YLL044W	-4.54598	0.000147545	0.000806851	3.80438
YMR212C	-1.50004	0.000147998	0.000808608	6.73774
YOR254C	-1.43055	0.000148137	0.00080865	7.99721
YOL101C	-1.86859	0.000148468	0.00080974	2.98986
YDL003W	-2.09581	0.000148813	0.000810905	6.47341
YBR085C-A	2.53475	0.000149304	0.000812795	8.74307
YLR191W	1.28764	0.000149423	0.000812795	6.28896
YGR032W	2.01327	0.000149934	0.000814172	8.14742
YNR069C	3.68206	0.000149941	0.000814172	8.23791
YIL164C	2.97987	0.000150455	0.000816245	8.98356
YJR154W	2.96923	0.000151141	0.00081735	6.66709
YPR113W	-1.22432	0.000151251	0.00081735	7.49919
YKR033C	8.60844	0.000151389	0.00081735	0.828501
YCL064C	2.53115	0.000151512	0.00081735	4.88649
YHR199C	1.11549	0.000151526	0.00081735	7.041
YPR141C	-1.60233	0.000151568	0.00081735	5.10585
YMR308C	-1.86749	0.000151779	0.00081735	7.76908
YKL133C	1.47684	0.000151848	0.00081735	5.01884
YDL138W	1.34116	0.000151949	0.00081735	6.78757
YGL202W	2.02573	0.000151985	0.00081735	11.3884
YLR076C	-3.04842	0.000152491	0.000819355	2.44753
YML106W	-1.51274	0.000152898	0.000820826	8.13003
YJR029W	1.90934	0.000153159	0.000821147	2.79826
YCL024W	-1.97026	0.000153338	0.000821147	4.93197
YNL159C	1.11548	0.000153357	0.000821147	5.82082
YDL104C	1.40959	0.000153612	0.000821635	5.14056
YIL156W	1.1488	0.000154008	0.000821635	6.4854
YDR448W	-1.18938	0.000154098	0.000821635	4.6941
YDR369C	1.1694	0.000154299	0.000821635	5.16302
YGR066C	2.81739	0.00015433	0.000821635	2.15
YJR117W	-1.10323	0.000154426	0.000821635	7.16827
YAL049C	1.14286	0.000154539	0.000821635	6.20938
YDL060W	-3.54533	0.000154664	0.000821635	7.09802
YDR309C	1.08921	0.000154761	0.000821635	6.9375
YJL133C-A	2.24899	0.000154818	0.000821635	9.59899
YFL023W	-2.6068	0.000155022	0.000821635	6.07086
YNL024C	-2.18536	0.000155048	0.000821635	2.63484
YGL102C	-2.98262	0.000156065	0.000826312	3.50312
YJL118W	-1.46607	0.000156468	0.000827733	4.15966
YNL093W	4.40066	0.000156812	0.000827987	1.4276
YAL035W	-1.7398	0.000156998	0.000827987	8.74847
YFL002C	-2.20157	0.00015704	0.000827987	6.11838
snR17b	-4.5514	0.000157053	0.000827987	0.893861
YGL114W	1.69235	0.000157389	0.000829052	8.38986
YDR367W	-1.15085	0.000157782	0.000830411	5.68669
YOL080C	-2.70514	0.000160117	0.000841276	5.59006
YDR265W	1.16176	0.00016012	0.000841276	5.95103
YHR040W	-2.7167	0.000160497	0.000842246	5.40729
YBR021W	-3.27225	0.000160602	0.000842246	4.49745
YER087C-B	-1.07935	0.000160737	0.000842246	6.95034
YFL034C-B	-1.09719	0.00016091	0.000842246	5.47475
YMR120C	-3.08587	0.000160987	0.000842246	9.72844
YFR032C-B	-2.3797	0.000161276	0.00084304	3.62658
YJL141C	1.09767	0.000161817	0.000844632	6.38834
YHR111W	1.2749	0.000161855	0.000844632	6.62141
YOR291W	-1.10765	0.000162131	0.000845357	5.77161
YDR098C-B	2.55775	0.000162549	0.000846819	4.16708
YJL109C	-3.06614	0.000162842	0.000847631	7.87567
YLR244C	-1.51105	0.000163153	0.000848533	7.89748
YLR062C	-5.1398	0.000163361	0.000848898	1.14376
YJL010C	-2.65728	0.000163617	0.00084922	6.06287
YGL101W	-1.19896	0.000163698	0.00084922	5.87523
YBR005W	1.133	0.000164408	0.000852186	5.93149
YKR046C	3.11054	0.000164583	0.000852373	7.66125
YAL036C	-2.85094	0.000164758	0.000852546	6.76501
YHR210C	2.16498	0.000164893	0.000852546	3.92082
YLR272C	-1.10091	0.000165262	0.000853631	5.54293
YDR281C	-1.83002	0.00016538	0.000853631	4.29545
YDL086W	1.17735	0.000165928	0.000855221	7.7334
YIL007C	1.65885	0.000165965	0.000855221	5.35633
YER176W	1.84283	0.000166699	0.000858284	8.2281
YPL236C	1.16637	0.000168086	0.000864703	5.66302
YOL113W	1.11441	0.000168493	0.000866076	6.34413
YNL312W	-1.07517	0.000168859	0.000867233	6.31395
YKL181W	-2.35514	0.000169131	0.000867904	8.12769
YOL124C	-2.81516	0.000169774	0.00087048	6.22947
YOR238W	1.52648	0.000170888	0.000875464	5.97871
YCR020C-A	1.22738	0.000171039	0.00087551	5.93158
YOR265W	1.02723	0.000171805	0.000878678	5.9027
YNL207W	-1.861	0.000171943	0.000878678	6.14819
YPR119W	-1.68375	0.000172425	0.000880413	5.91648
YOR210W	-1.42983	0.000173395	0.00088463	6.68686
YDR259C	1.66544	0.000174099	0.000887489	3.4347
YPR178W	1.10279	0.000174523	0.000888914	5.99299
YKL129C	1.70985	0.000174907	0.000890134	6.55677
YPL006W	1.26811	0.000175779	0.000893834	7.40537
YOR364W	1.99829	0.000175989	0.000894163	2.55202
YPL166W	2.13453	0.000176176	0.000894264	4.80457
YGR187C	-1.66395	0.000176299	0.000894264	6.71401
YMR217W	-3.18606	0.000177392	0.00089907	8.92274
YKR085C	-1.22128	0.000177875	0.000900601	5.35298
YNR056C	2.03822	0.000177987	0.000900601	3.45015
YCL059C	-2.90536	0.000178306	0.000901474	6.76855
YGR158C	-1.95173	0.000178833	0.00090261	5.77172
YGR200C	-2.57008	0.000178855	0.00090261	7.04744
YMR018W	1.85806	0.000178983	0.00090261	3.12991
YOR305W	-1.17043	0.000179116	0.00090261	5.45172
YDR040C	1.04939	0.000179684	0.0009045	6.37186
YNL147W	-1.36472	0.000179785	0.0009045	5.67519
YER113C	-1.24574	0.000180701	0.00090837	6.16804
YJL202C	2.66885	0.000181137	0.000909819	1.45638
YLL039C	2.12138	0.0001815	0.000910899	9.49637
YKR019C	1.05422	0.000181761	0.000910943	5.57483
YHR175W	1.35893	0.000181804	0.000910943	6.9884
YMR291W	-1.4173	0.00018288	0.000915457	6.3817
YHR208W	-1.7948	0.000183002	0.000915457	10.0033
YGR254W	-2.43485	0.000183315	0.000915551	10.3592
YBR272C	1.28596	0.000183318	0.000915551	5.8067
YER032W	-1.27512	0.000184038	0.000918404	5.71073
YOR047C	-1.10662	0.000184525	0.000920086	6.74937
YHR094C	-2.2729	0.000185246	0.000922934	9.89144
YGR174C	1.23905	0.000186639	0.000928722	5.99394
YKL208W	1.214	0.000186881	0.000928722	4.59675
YDL231C	1.25635	0.000186985	0.000928722	8.03275
YBR130C	-1.00632	0.00018701	0.000928722	6.27585
YIL066C	2.42705	0.000188203	0.000933329	3.76382
YHL013C	-1.22893	0.000188274	0.000933329	5.46982
YNL255C	-1.96071	0.000188392	0.000933329	8.56187
YKL120W	-1.35123	0.000188822	0.00093438	8.76561
YER139C	1.17451	0.000188908	0.00093438	4.95375
YGL229C	1.91585	0.000189198	0.000934486	6.10254
YGR110W	1.81865	0.000189232	0.000934486	5.43867
YPR112C	-3.19456	0.000189981	0.000937435	7.16061
YKL069W	1.02141	0.00019016	0.000937565	5.86336
YDR179W-A	1.10046	0.00019052	0.00093859	5.97871
YKR039W	3.29206	0.000191222	0.000941297	11.9404
YDR314C	1.07594	0.000191857	0.000943317	5.32859
YPL070W	1.38794	0.000191939	0.000943317	6.42149
YOR128C	-1.45428	0.00019222	0.000943947	8.04758
YBL068W	-1.17677	0.000192926	0.000946658	6.05605
YMR149W	-1.10678	0.000193205	0.000947272	7.30284
YJL103C	1.95331	0.000194298	0.000951877	4.49301
YPL237W	-1.57659	0.000194527	0.000952241	8.47898
YJR076C	-1.18902	0.000195351	0.000954738	6.96113
YOR133W	-1.50149	0.000195557	0.000954738	9.31249
YPR158C-D	2.11817	0.000195605	0.000954738	5.88198
YOL164W	1.33812	0.000195657	0.000954738	6.29899
YHR172W	-1.36709	0.000196288	0.000957058	4.86437
YAR002W	-1.25102	0.000196961	0.000959582	6.36211
YKR098C	1.11462	0.000197173	0.000959636	5.28361
YPR163C	-1.83659	0.000197284	0.000959636	8.91902
YPR187W	-1.70477	0.00019749	0.000959786	7.63406
YOL094C	-1.05658	0.000197626	0.000959786	5.22767
YDR266C	-1.11666	0.000198007	0.000960852	6.3519
YPR083W	1.60457	0.000198276	0.000960852	6.53468
YJL186W	-1.2729	0.000198349	0.000960852	6.99168
YPR145C-A	3.22654	0.000198469	0.000960852	2.34932
YBL078C	2.50389	0.000199152	0.00096308	5.6046
YBR233W-A	-1.61971	0.000199242	0.00096308	4.47752
YPL036W	1.89473	0.000200128	0.000966608	5.81562
YHR085W	-2.38627	0.000200586	0.000968057	5.65902
YPR098C	1.24592	0.000201024	0.000969299	6.29478
YDR059C	1.99151	0.0002012	0.000969299	6.20363
YDR165W	-2.36768	0.000201315	0.000969299	6.47674
YMR277W	-1.58388	0.000201725	0.00097034	6.71424
YLR178C	2.49276	0.000201846	0.00097034	6.62412
YOL007C	-1.11605	0.000202476	0.000971408	6.53042
YNR070W	1.45265	0.00020249	0.000971408	3.5982
YEL028W	1.57828	0.000202541	0.000971408	3.92019
YGL253W	-1.62314	0.000203075	0.000973213	9.92561
YCR091W	1.33953	0.000203332	0.000973686	4.8792
YGL053W	1.57974	0.000203691	0.000974648	5.45433
YGR174W-A	2.93281	0.000204548	0.000977625	2.88198
YMR215W	-2.96597	0.00020463	0.000977625	7.23213
YIL053W	-1.79052	0.000207683	0.00099144	10.9868
YKR024C	-2.47568	0.000207898	0.000991698	6.10345
YPL210C	-1.2323	0.000208507	0.000993836	7.273
YKL125W	-1.49152	0.000209264	0.000996594	5.88178
YHR100C	1.37789	0.000209536	0.000996594	5.8185
snR87	-3.07717	0.000209661	0.000996594	0.867866
YGL092W	-1.37412	0.000209746	0.000996594	7.27994
YFL041W-A	2.26662	0.000209894	0.000996594	3.77786
YPL101W	-1.11454	0.00021036	0.000997228	6.31029
YNL282W	-1.67912	0.000210498	0.000997228	4.70509
YJL132W	1.53333	0.000210513	0.000997228	4.76862
YHL004W	-1.02234	0.00021115	0.000999477	6.26828
YDR339C	-1.37729	0.000211441	0.00099951	5.88652
YFR023W	3.79128	0.000211522	0.00099951	1.68711
YBL035C	-1.0484	0.000211644	0.00099951	5.32534
YNL119W	-2.10493	0.000212499	0.00100208	5.96216
YGR268C	1.24449	0.000212514	0.00100208	5.82379
YGR229C	-1.20659	0.000213146	0.0010043	8.00428
YBR067C	-1.06191	0.000214094	0.00100793	7.13217
YJR039W	1.74865	0.000214244	0.00100793	6.02033
YDR380W	3.23913	0.0002162	0.00101538	3.9388
YDR321W	-1.78107	0.000216283	0.00101538	6.6322
YLR348C	1.29629	0.000216404	0.00101538	8.55462
YIL017C	1.38489	0.000216487	0.00101538	6.23262
YEL061C	-1.16784	0.000217028	0.00101714	6.33776
YLR198C	-4.35067	0.000217251	0.00101741	2.75429
YNL234W	-1.27898	0.00021794	0.00101923	4.90334
YLR083C	-1.45953	0.000217969	0.00101923	8.13654
YKR014C	1.36649	0.000218456	0.00102073	7.99842
YPL041C	1.18617	0.000221228	0.00103231	4.39943
YDR379W	1.02541	0.000221377	0.00103231	6.53244
YJL060W	1.68073	0.000221436	0.00103231	8.36723
YGR128C	-2.93628	0.000221838	0.0010334	6.70817
YMR263W	-1.26437	0.000222135	0.001034	5.13534
YGL094C	-0.982323	0.00022345	0.00103934	6.48567
YBR128C	2.03052	0.00022366	0.00103953	4.34569
YDR398W	-2.27154	0.000224734	0.00104298	7.67031
YIL149C	-1.2265	0.000224765	0.00104298	7.11138
YMR006C	-1.4464	0.000225037	0.00104298	5.50103
YJL123C	-1.27187	0.000225079	0.00104298	7.2422
snR33	-1.5401	0.000225694	0.00104505	4.08598
YGR192C	-2.47732	0.000226131	0.00104628	13.7411
YDR010C	3.60427	0.000226352	0.00104641	1.25458
YPL244C	-1.04769	0.000226498	0.00104641	6.61133
YHR050W	-0.990004	0.000227075	0.00104829	6.81608
YPL177C	1.00983	0.000227274	0.00104842	6.58858
YJL125C	-2.31762	0.000228108	0.00105148	6.12443
YGR208W	-1.67992	0.000229172	0.0010556	6.88905
YER115C	-1.35587	0.000229634	0.00105638	5.47326
YDL234C	1.31242	0.000229835	0.00105638	6.56534
YDR383C	1.13306	0.000229856	0.00105638	5.53937
YDR444W	-1.37332	0.000230802	0.00105994	5.6528
YDR412W	-1.8894	0.000232053	0.00106425	6.42762
YPR176C	1.04693	0.000232086	0.00106425	6.70022
YMR176W	1.03842	0.000233055	0.0010679	6.52036
YKL021C	-1.77215	0.000233358	0.00106849	6.45308
YNR066C	2.24337	0.000233566	0.00106865	5.56786
YHR065C	-2.4052	0.000234332	0.00107074	6.46065
YPL262W	1.50345	0.00023437	0.00107074	8.76496
YNR028W	-1.06456	0.000234694	0.00107142	6.00239
YNL047C	0.957549	0.000235293	0.00107336	6.06866
YDR371W	1.15277	0.0002359	0.00107533	5.95453
YLL022C	-1.08035	0.000237605	0.00108139	5.54064
YCR106W	1.48062	0.000237735	0.00108139	6.02172
YDL047W	-1.16338	0.000237921	0.00108139	7.15711
YBR045C	2.71801	0.000237931	0.00108139	4.61445
YOL055C	1.07895	0.000238411	0.00108277	5.37697
YDL093W	-1.02423	0.000238911	0.0010838	5.8343
YIL077C	1.22024	0.000238989	0.0010838	5.87645
YCL008C	1.01187	0.000241009	0.00109159	6.16733
YLR139C	-1.13948	0.00024106	0.00109159	4.68283
YMR102C	-1.01414	0.00024279	0.00109796	6.40956
YDR322C-A	1.21118	0.000242824	0.00109796	7.36734
YJR144W	-1.05933	0.000244071	0.00110279	6.29593
YKR076W	2.25651	0.000245082	0.0011058	5.48416
YER082C	-2.62057	0.000245096	0.0011058	6.55368
YHR033W	-1.92762	0.00024536	0.00110583	4.11166
YDR419W	1.15133	0.000245511	0.00110583	6.18701
YMR015C	-1.096	0.00024564	0.00110583	7.47946
YGL164C	0.959905	0.00024614	0.00110727	6.1463
YGR210C	-1.17658	0.000246674	0.00110788	7.00691
YNL290W	-0.965196	0.000246762	0.00110788	6.353
YLR045C	-1.27668	0.000246815	0.00110788	6.24928
YPL265W	3.11172	0.000247168	0.00110866	11.1976
YJR084W	0.995491	0.000247493	0.0011091	6.11827
YHR086W	-0.983928	0.000247626	0.0011091	5.88092
YGR098C	-1.44728	0.00024802	0.00111005	5.59687
YMR238W	1.37034	0.00024918	0.00111444	8.30837
YGR266W	0.99497	0.000251238	0.00112244	6.84866
YPL144W	-1.24926	0.000251334	0.00112244	4.51462
YLR276C	-2.37223	0.000251768	0.00112333	7.30505
YMR214W	-1.16109	0.000251916	0.00112333	6.80953
YLR058C	-2.6205	0.00025208	0.00112333	10.2063
YKR065C	-0.994252	0.000252357	0.00112352	5.64314
YDR297W	-1.40466	0.000252486	0.00112352	6.853
YER138W-A	2.29525	0.00025326	0.00112615	4.30247
YIL087C	1.71041	0.000254096	0.00112824	5.04042
YKR080W	-2.29575	0.000254258	0.00112824	7.22117
YBL080C	1.13866	0.00025428	0.00112824	5.13433
YGR197C	1.90903	0.000255437	0.0011319	6.26423
YMR315W-A	4.0303	0.000255472	0.0011319	1.10021
YIL061C	1.49908	0.000256761	0.00113679	5.8805
YMR246W	-1.47832	0.000257662	0.00113979	8.39214
YDL063C	-3.60715	0.000257807	0.00113979	6.511
YBR060C	-1.2492	0.000258399	0.00114159	5.73736
YKR037C	-1.1631	0.000258608	0.00114169	4.49743
YKL054C	-1.13581	0.000259033	0.00114275	7.93324
YOR351C	3.22945	0.000259515	0.00114405	0.614213
YHR098C	-1.13429	0.000260822	0.00114799	7.10194
YGR142W	-1.97829	0.000260827	0.00114799	5.50808
YPR064W	3.0595	0.000261033	0.00114799	0.933713
YJL209W	-1.04249	0.000261153	0.00114799	5.40395
YPR002C-A	2.90749	0.000261765	0.00114986	1.58293
YJL033W	-3.3028	0.000262452	0.00115206	7.13464
YPR111W	1.70532	0.000262705	0.00115235	6.87157
YFL054C	1.35358	0.000263105	0.00115328	4.96911
YFL036W	-1.21078	0.000263361	0.00115359	6.36773
YPL256C	-1.53957	0.000264192	0.00115556	6.23918
YHR062C	-2.16264	0.000264207	0.00115556	5.68897
YPR201W	1.75274	0.000264373	0.00115556	3.18203
YJL069C	-1.77927	0.000265095	0.00115761	6.8717
YGR213C	3.27906	0.000265218	0.00115761	1.46676
YHR194W	1.22811	0.000266154	0.00116087	6.25685
YFL010C	1.21562	0.000266458	0.00116137	8.35544
YMR001C	-1.07693	0.000266833	0.00116218	6.45283
YBR015C	-1.09134	0.000267256	0.0011632	7.83394
YPL012W	-3.11979	0.000267589	0.00116383	7.95413
YPL128C	-1.17196	0.000268541	0.00116625	5.68006
YPL034W	0.932963	0.000268689	0.00116625	5.86038
YNL001W	-1.48392	0.000268712	0.00116625	5.85812
YPL274W	1.29488	0.000269098	0.0011671	8.35989
YNL283C	-1.22467	0.000269471	0.0011679	6.81557
YMR275C	0.987693	0.00026969	0.00116802	6.79158
YOR292C	1.22787	0.000270657	0.00116985	4.96182
YJR007W	-1.24093	0.000270718	0.00116985	7.67183
YOR324C	0.959699	0.000270728	0.00116985	6.16973
YBL102W	1.46763	0.000270963	0.00116985	7.86287
YDL230W	1.6104	0.000271092	0.00116985	5.89807
YGL007W	3.64198	0.000271424	0.00116985	2.06071
YNL064C	-1.82012	0.00027144	0.00116985	9.14995
snR30	-2.01739	0.000272496	0.00117358	3.72791
YEL037C	-1.07067	0.00027377	0.00117824	7.7354
YMR184W	1.00918	0.000274544	0.00118017	5.13724
YDR492W	-1.43216	0.000274727	0.00118017	6.81845
YHR121W	-1.01563	0.000274792	0.00118017	6.18501
YIL070C	-1.18874	0.000275636	0.00118226	5.49979
YDR070C	4.00168	0.000275662	0.00118226	4.70595
YML118W	2.12574	0.000275999	0.00118288	4.43973
snR59	-4.41669	0.000276737	0.00118436	0.770262
YKR082W	-1.4674	0.000276848	0.00118436	6.59824
YMR050C	2.05741	0.000277089	0.00118436	3.92478
YJL034W	-1.62228	0.000277113	0.00118436	9.36616
YBR118W	-1.94362	0.000277906	0.00118693	11.6064
snR18	-2.54552	0.000278268	0.00118765	1.86836
snR54	-4.01997	0.000278499	0.00118781	1.03301
YJL207C	-1.16596	0.000279008	0.00118841	6.46473
YDR435C	1.14922	0.000279226	0.00118841	5.94104
YOL123W	-1.17954	0.000279553	0.00118841	7.59954
snR4	-1.47476	0.00027968	0.00118841	3.673
YPL136W	3.35559	0.000279689	0.00118841	0.52543
YBR244W	-1.04286	0.000279795	0.00118841	7.04646
YPL235W	-1.13453	0.000280377	0.00118879	6.93221
YDR525W-A	1.37688	0.000280391	0.00118879	6.73803
YOR091W	-2.01318	0.000280465	0.00118879	6.8849
YCL032W	0.945757	0.000281663	0.00119278	5.76839
YNL041C	1.09847	0.000281792	0.00119278	7.00113
YPL119C-A	2.17002	0.000284524	0.00120351	2.64952
YPL266W	-2.5669	0.00028562	0.00120732	6.12294
YNL156C	1.19219	0.000285834	0.0012074	7.67009
YGL139W	-1.10591	0.000286736	0.00120996	6.63286
YBR104W	1.46321	0.000286832	0.00120996	8.12181
YBR094W	-1.1627	0.000287234	0.00121045	5.55791
YLR023C	1.28432	0.000287342	0.00121045	7.79448
YLR106C	-2.58593	0.000287678	0.00121104	7.59617
YER185W	2.45737	0.000287918	0.00121122	3.48673
YLR378C	-1.17045	0.000288173	0.00121147	8.45062
YNL121C	-1.09219	0.000288486	0.00121196	7.93581
YIL097W	1.67916	0.00028954	0.00121556	5.15195
YER007C-A	-1.24941	0.000289831	0.00121595	6.6487
YOR192C	1.48584	0.000291204	0.00122088	4.82035
YPL019C	-1.06731	0.00029247	0.00122463	7.97762
YER175C	3.98538	0.000292497	0.00122463	10.2445
YOR044W	1.28881	0.00029274	0.00122482	6.09924
YLR440C	-1.03054	0.000294293	0.00123048	5.66466
snR45	-2.77952	0.000295415	0.00123414	1.27227
YMR125W	-1.2207	0.000295601	0.00123414	7.18035
YHR163W	-1.17899	0.00029577	0.00123414	8.08232
YAL053W	1.17445	0.000296988	0.00123835	8.14953
YML099C	1.11898	0.000297181	0.00123835	7.35705
YDR223W	1.77015	0.000297766	0.00123995	3.43933
YGR245C	-2.78746	0.000298094	0.00124013	7.5581
YGR121C	1.24295	0.000298304	0.00124013	7.69517
YFR034W-A	-1.27002	0.000298604	0.00124013	4.59738
YJL092W	-1.21308	0.000298614	0.00124013	6.09669
YPR010C-A	1.17744	0.000299038	0.00124102	5.8147
YGL063W	-1.42203	0.000299257	0.00124102	4.84323
YML029W	0.960243	0.000299497	0.00124102	6.36967
YGL219C	1.58302	0.000299634	0.00124102	7.26937
YIL058W	3.28963	0.000300394	0.00124334	1.24759
YMR203W	-1.09202	0.000300772	0.00124406	7.70302
YHR081W	-1.97127	0.000301709	0.0012471	5.78573
YOL143C	-1.30465	0.000302373	0.00124885	8.105
YMR092C	1.13756	0.000302706	0.00124885	7.66253
YLR080W	1.91571	0.000302738	0.00124885	4.67896
YKL157W	1.3283	0.000303392	0.00125026	8.46133
YDR161W	-2.2054	0.000303486	0.00125026	6.3464
YNL185C	-1.3083	0.00030404	0.0012517	3.93223
YGR125W	1.24999	0.000304648	0.00125337	8.04357
YLR051C	-1.53252	0.000305279	0.00125513	6.19106
YJL187C	-0.922296	0.000305591	0.00125557	6.27821
YDR262W	1.22711	0.000305843	0.00125577	7.2049
YBR106W	-1.26102	0.000307426	0.00126059	9.1735
YHL027W	1.40557	0.000307678	0.00126059	8.12628
YLR234W	-1.30524	0.000307774	0.00126059	3.6963
YHR051W	1.1061	0.000307835	0.00126059	7.2229
YBR250W	2.0699	0.000308578	0.00126198	3.53136
YER002W	-1.55336	0.000308585	0.00126198	7.37023
YJL201W	1.17162	0.000309169	0.00126353	6.77029
YIL071C	1.12061	0.000309831	0.0012654	5.48134
YDR280W	-1.23405	0.000310995	0.00126931	6.44764
YOR098C	-1.44654	0.000311478	0.00126994	7.21196
YBR169C	1.58563	0.000311561	0.00126994	5.96474
YBR265W	-1.12489	0.000312162	0.00127077	6.6351
YNL183C	1.70222	0.000312177	0.00127077	7.21274
YHL021C	2.55446	0.000312777	0.00127237	6.28786
YDL035C	1.35956	0.00031452	0.00127643	7.80071
YNL130C-A	3.91682	0.00031463	0.00127643	0.492003
YGR246C	1.0176	0.000314632	0.00127643	6.56185
YPR005C	1.37304	0.000314974	0.00127643	3.91089
YIL152W	1.23539	0.000314986	0.00127643	5.76383
YKL051W	-1.36134	0.000315267	0.00127643	6.43026
YOL163W	1.65649	0.000315484	0.00127643	3.05506
YLR018C	-1.35005	0.000315605	0.00127643	5.69972
YHR171W	2.16862	0.000315637	0.00127643	5.37822
YOL002C	-0.93871	0.000315952	0.00127686	6.42087
YPR063C	-1.03217	0.000317351	0.00128167	7.11848
YGL140C	1.29623	0.000318213	0.00128431	8.40411
YCL048W	3.29009	0.000320573	0.00129299	1.24664
YKL072W	1.18097	0.000322002	0.0012979	6.3791
YBR002C	-1.67912	0.000322962	0.00130092	6.29061
YDR002W	-1.3091	0.000323347	0.00130163	8.82112
YIL091C	-2.58013	0.000323804	0.00130261	6.80571
YJL192C	-0.927755	0.000324626	0.00130507	6.58701
YER152C	1.09868	0.000325031	0.00130526	7.3669
YER156C	-1.57294	0.000325225	0.00130526	7.43663
YGL258W-A	2.66664	0.000325309	0.00130526	1.59196
YJL022W	3.47068	0.000325918	0.00130685	1.51936
YOL016C	1.837	0.000326452	0.00130814	7.34492
YFL028C	1.6425	0.000328981	0.00131742	7.83418
YLR161W	3.60747	0.000330098	0.00132104	2.32297
YMR207C	1.05737	0.000330997	0.00132244	7.05139
YJL212C	-1.7337	0.000331124	0.00132244	7.29609
YER016W	-1.37569	0.00033127	0.00132244	5.82046
YDR377W	1.11301	0.000331307	0.00132244	7.60395
YPL126W	-2.5964	0.000331527	0.00132246	7.53066
YPL280W	3.88065	0.000332076	0.00132379	2.42346
YBR035C	1.42024	0.000332349	0.00132403	8.6079
YDR018C	1.87749	0.000333063	0.00132601	2.39004
YLR243W	-1.45485	0.00033334	0.00132626	5.3688
YIL038C	-1.20423	0.000333709	0.00132687	6.88392
YDR364C	-1.235	0.000334633	0.00132921	5.81897
YML045W	2.02137	0.000334728	0.00132921	2.19262
YOR287C	-4.90877	0.000335124	0.00132992	4.50569
YPL160W	-1.43919	0.000335816	0.00133181	8.9341
YKL130C	-1.06066	0.000336687	0.00133427	4.922
YBR012W-B	2.09528	0.000336868	0.00133427	4.01446
YOL012C	-1.24377	0.000337519	0.00133554	6.31608
YMR147W	-1.42759	0.000337823	0.00133554	3.30954
YKL122C	-0.900778	0.000337839	0.00133554	6.41577
YHR197W	-3.59956	0.000338128	0.00133582	6.18368
YJL096W	-0.960055	0.000339045	0.00133859	5.26462
YIL102C-A	1.43876	0.000339277	0.00133864	4.72005
YMR003W	-1.62522	0.000340492	0.00134258	4.3559
YDR136C	4.89584	0.000341543	0.00134586	0.506
YIL010W	1.03082	0.000342694	0.00134883	6.49434
YNL050C	-1.15534	0.000342733	0.00134883	5.75518
YBL001C	0.970028	0.000343761	0.00135201	7.39837
YGR004W	-1.15129	0.000344554	0.00135426	4.57356
YLR119W	0.988268	0.000345739	0.0013573	5.00588
YLR240W	0.994116	0.00034579	0.0013573	6.08608
YOR160W	-1.21593	0.000346177	0.0013573	6.03603
YPR049C	0.959389	0.000346208	0.0013573	5.85799
YCL033C	1.02155	0.000347177	0.00135874	5.58132
YBL011W	-0.924818	0.000347182	0.00135874	6.82926
YOL115W	-1.09324	0.000347236	0.00135874	6.08491
YLR336C	-2.4331	0.000350063	0.00136893	6.32476
YDR065W	-1.07296	0.000350744	0.00137073	4.37928
YML027W	-1.7799	0.00035346	0.00138047	5.89452
YBR255W	1.07235	0.00035407	0.00138164	6.53609
YMR011W	-3.67396	0.00035421	0.00138164	7.88441
YPR188C	0.888928	0.000356645	0.00139026	5.94509
YLR182W	-0.970885	0.000357184	0.00139148	6.37456
YJL146W	0.949634	0.00035769	0.00139257	6.07183
YLR456W	1.15877	0.000359306	0.00139798	4.3777
YJL100W	1.16935	0.000359928	0.00139952	6.05668
YIR018C-A	3.0452	0.000360218	0.00139976	1.5448
YIR030W-A	3.4068	0.000361753	0.00140484	0.570166
YLR359W	-1.96692	0.00036385	0.00141209	9.3636
YDR325W	-0.944879	0.000364943	0.00141545	5.73804
YMR205C	-1.33983	0.0003652	0.00141555	9.64794
YEL067C	1.94583	0.00036564	0.00141637	3.96528
YEL029C	1.28605	0.000366138	0.0014171	6.64406
snR189	-3.02323	0.000366288	0.0014171	0.47469
RNA170	2.21486	0.000366713	0.00141779	1.95295
YDL177C	1.03375	0.000366927	0.00141779	5.33349
YJR063W	-2.65379	0.00036925	0.00142522	5.83585
YOR085W	-0.962204	0.000369313	0.00142522	7.41849
YHR013C	-1.06911	0.00036964	0.00142547	6.03774
YGR054W	-1.0285	0.00036984	0.00142547	7.77907
YPR080W	-2.06542	0.000370201	0.00142597	11.1912
YIL121W	1.49557	0.000371313	0.00142936	9.56455
YGL172W	-0.898461	0.000372353	0.00143219	6.37878
RUF20	1.51102	0.000372513	0.00143219	3.3864
YBR078W	-1.39331	0.000372748	0.0014322	10.1901
YJR035W	1.09481	0.000373991	0.00143535	6.31207
YIR041W	3.82938	0.000374378	0.00143535	0.6939
YBR109C	1.20648	0.000374388	0.00143535	8.75177
YLR373C	-0.991454	0.000374501	0.00143535	5.78495
YOR004W	-2.56643	0.000375333	0.00143671	6.18201
YGL200C	-1.19162	0.000375516	0.00143671	8.08399
YGL008C	-1.81844	0.000375559	0.00143671	12.443
YJL198W	-2.06802	0.000375786	0.00143671	7.30825
YMR186W	-1.59154	0.000376633	0.00143905	10.7287
YOR228C	1.22951	0.00037702	0.00143964	5.37554
YMR193C-A	-3.14201	0.000378286	0.00144358	1.20449
YER037W	3.1422	0.000378946	0.00144519	6.61214
YER137C	-2.56661	0.00037939	0.00144519	3.55846
YOL011W	-0.885498	0.000379412	0.00144519	6.59389
YKL215C	0.955773	0.000380547	0.00144862	6.69208
YDL064W	-1.1614	0.00038392	0.00146048	5.85458
YBR047W	3.05187	0.000384323	0.00146048	6.45842
YDR224C	-1.58262	0.000384373	0.00146048	9.75407
YEL038W	0.977044	0.000384931	0.00146089	6.95871
YPR159C-A	4.31902	0.000384956	0.00146089	0.0147885
YAR068W	3.83602	0.000388049	0.00147131	0.0799571
YLL018C-A	-2.07598	0.000388179	0.00147131	4.15011
YHR105W	1.25315	0.00038881	0.0014728	4.16047
YDR178W	1.52304	0.000389388	0.00147408	6.87903
YOR204W	-1.30517	0.000389724	0.00147444	8.40564
YHL007C	-1.34302	0.000390624	0.00147646	7.52503
YMR259C	-1.81352	0.000391136	0.00147646	6.32611
YMR118C	4.38216	0.000391213	0.00147646	1.95501
YJR151C	1.31744	0.000391216	0.00147646	4.36604
YLR426W	0.94409	0.000392015	0.00147857	6.08873
YGR105W	-0.909866	0.000395036	0.00148906	6.19717
YPL089C	0.905585	0.000396087	0.0014906	6.80937
YNR016C	-1.7158	0.000396147	0.0014906	9.16547
YJR133W	0.905911	0.000396172	0.0014906	6.52758
YGL097W	-1.11639	0.000396444	0.00149072	7.16979
YIL056W	1.97855	0.000396734	0.0014909	7.85378
YBR141C	-2.46093	0.000397776	0.00149363	4.52988
YHR063C	1.19569	0.000397945	0.00149363	7.94667
YDR261C-D	1.48238	0.000398619	0.00149446	4.53214
YLR003C	-2.05009	0.000398653	0.00149446	5.71366
YHR166C	1.03005	0.000399371	0.00149537	5.88225
YBR293W	1.47049	0.000399406	0.00149537	6.01563
YKL014C	-1.96624	0.000399622	0.00149537	7.15571
YKR079C	-2.30095	0.000400447	0.00149755	5.9639
YBR077C	0.935502	0.000401647	0.00150112	6.23929
YLR278C	-0.903483	0.000402152	0.0015021	6.76256
YLL034C	-2.35011	0.00040256	0.00150271	6.80522
YDR226W	-1.25421	0.000402976	0.00150283	9.24735
YER081W	1.80702	0.000403295	0.00150283	9.6283
YGR244C	1.7149	0.000403835	0.00150283	8.65613
YDL213C	-1.93766	0.000403842	0.00150283	6.47866
YDL140C	-1.08979	0.00040415	0.00150283	8.27886
YGR240C	-1.29768	0.000404222	0.00150283	10.1276
YCR024C	1.25378	0.000404297	0.00150283	5.29416
YOR389W	1.26746	0.000404849	0.00150397	3.75181
YDL143W	-1.10155	0.000405371	0.001505	8.23418
YJR092W	-1.31833	0.000405827	0.00150579	6.33139
YIL088C	1.32718	0.000406233	0.00150639	8.79335
YMR069W	-2.91521	0.000407118	0.00150859	1.68209
YPR134W	1.00493	0.000407317	0.00150859	5.02527
YEL071W	2.25232	0.000407889	0.0015098	11.5812
YGL061C	-1.1896	0.000408774	0.00151217	4.41805
YNL088W	-0.92426	0.00040966	0.00151454	6.81514
YML074C	-1.11325	0.000410997	0.00151857	8.16397
YFL030W	2.14498	0.000411584	0.00151983	4.84026
YNL313C	-1.84488	0.000412142	0.00152015	7.0185
YEL007W	-1.54348	0.000412165	0.00152015	6.47596
YHR099W	-1.12822	0.000412988	0.00152227	6.92523
YHR077C	-1.31153	0.000413366	0.00152276	7.08568
YHL039W	-2.06829	0.000414604	0.00152641	6.25745
YIL145C	-0.92078	0.000415777	0.00152981	6.68416
YHR136C	-0.892522	0.000416302	0.00153083	5.33066
YML018C	-1.92193	0.000417821	0.0015355	7.48381
YGR256W	2.41567	0.000418212	0.00153602	2.6177
YOR120W	1.52928	0.000418959	0.00153784	5.93785
YLR291C	-0.978228	0.000419604	0.0015393	6.3027
YGR161C-D	2.13793	0.000420999	0.0015435	5.31286
YJR043C	-1.04586	0.000421266	0.00154356	5.18524
YMR233W	-1.27604	0.000422302	0.00154643	4.73355
YNL216W	-0.933423	0.000422557	0.00154645	6.83485
YGR169C	-1.14031	0.000424292	0.00155188	4.29244
YLL062C	-1.8669	0.000427308	0.00156154	4.24895
YEL043W	-0.903459	0.00042744	0.00156154	6.61773
YIL035C	-1.0019	0.000428845	0.00156574	7.1641
YNL154C	-0.993013	0.000429366	0.00156616	7.90284
YOR260W	-1.54547	0.00043012	0.00156616	7.28189
YGR035C	-1.36974	0.000430142	0.00156616	3.93229
YHR041C	-0.862583	0.000430337	0.00156616	5.7225
YJL050W	-3.20162	0.000430389	0.00156616	7.29749
YGR078C	-0.994441	0.00043079	0.00156616	6.04655
YMR307W	-1.38084	0.000430911	0.00156616	10.5285
snR76	-3.4281	0.000430992	0.00156616	0.1499
YOL154W	-2.18244	0.000431851	0.00156835	7.09654
YKL141W	1.25432	0.000432566	0.00157003	7.72863
YJR156C	1.55121	0.000433334	0.00157189	3.0993
YBL103C	1.51712	0.00043401	0.00157256	7.39826
YGR122W	0.939824	0.00043403	0.00157256	5.83285
YJL099W	0.88202	0.000434834	0.0015743	5.90473
YHR069C	-1.95184	0.000435022	0.0015743	6.01508
YLR005W	1.09837	0.00043544	0.00157489	7.02928
YJR048W	-1.37566	0.000435817	0.00157533	6.04627
YDR284C	1.50301	0.000438353	0.00158357	7.7303
YKL206C	0.92705	0.000439485	0.00158673	6.12136
YHR181W	-0.856954	0.000439994	0.00158764	6.01489
YNL126W	-0.975176	0.000440391	0.00158814	5.41301
YJL023C	0.901596	0.000441145	0.00158993	5.19452
YGR177C	-1.75889	0.000441661	0.00159086	4.11083
YDR358W	1.54612	0.000442912	0.00159351	5.31246
YDR441C	-0.997149	0.000442915	0.00159351	5.48209
YJR130C	2.92131	0.000444848	0.00159953	9.16039
YMR167W	1.02026	0.000446071	0.00160299	6.14927
YML034W	-0.880621	0.00044864	0.00161129	6.37494
YGR144W	1.7478	0.000449446	0.00161243	2.46705
YOR028C	-1.25097	0.000449481	0.00161243	3.63039
YNL280C	-0.898073	0.00045085	0.0016164	7.19127
YJL208C	-1.18763	0.000451661	0.00161836	5.8386
YER024W	3.98737	0.000452475	0.00162034	10.0021
YCL050C	-0.95744	0.00045401	0.00162489	7.7846
YLR249W	-2.23651	0.000454326	0.00162508	11.8331
YKR009C	1.21504	0.000454631	0.00162523	5.19004
YBR121C	-1.24797	0.000456026	0.00162927	8.82859
YMR073C	0.991165	0.000456683	0.00163067	5.80477
YNL288W	-0.894386	0.000457729	0.00163346	6.03462
YDL202W	-0.957596	0.000460157	0.00163926	5.42306
YOR130C	2.08818	0.000460236	0.00163926	8.24972
YKL107W	3.42311	0.000460306	0.00163926	1.67997
YDR155C	-1.43715	0.000460681	0.00163926	7.71838
YIL099W	2.87651	0.000460685	0.00163926	2.97458
YJL045W	2.07027	0.000462034	0.00164311	1.94986
YBR240C	1.44505	0.000463321	0.00164674	3.47124
YGR100W	0.90055	0.000464081	0.00164849	6.95912
YKL042W	-1.25597	0.00046456	0.00164924	4.77587
YNL127W	0.839132	0.000465758	0.00165209	6.27075
YKL112W	-0.864611	0.000465897	0.00165209	6.72878
YHR139C	2.25259	0.000466876	0.0016546	2.34404
YOR275C	0.926126	0.0004675	0.00165586	6.1292
YBL082C	-1.30451	0.000468179	0.00165732	5.60881
YCR046C	-0.85316	0.000469483	0.00166098	5.62507
YPR110C	-1.9584	0.00047126	0.00166631	7.75808
YKR056W	-1.81169	0.000473319	0.00167231	6.76998
YNL279W	1.80725	0.000473501	0.00167231	2.28906
YBR287W	1.20846	0.000476176	0.0016808	8.09309
YNL115C	1.65304	0.000476718	0.00168175	7.11774
YPL005W	1.00919	0.00047769	0.00168421	5.02359
YJL193W	-0.97218	0.000479166	0.00168845	5.12689
YFR021W	0.937101	0.00048182	0.00169683	5.97455
YBL004W	-3.16194	0.000482412	0.00169795	7.06754
YOR370C	-1.05553	0.00048336	0.00170031	7.93512
YLR420W	-1.42887	0.000483653	0.00170037	7.76293
YNL232W	-1.19112	0.000485699	0.00170659	6.30411
YLR211C	1.36121	0.000485983	0.00170662	6.19888
YLR350W	-0.914697	0.000486639	0.00170795	6.13833
YDL031W	-1.96814	0.000487235	0.0017084	7.37001
YBR271W	-1.82318	0.000487322	0.0017084	5.83463
YBR252W	-1.0388	0.00048833	0.00171029	5.93838
YJR021C	0.924569	0.000488666	0.00171029	5.89586
YDL156W	-1.00628	0.00048888	0.00171029	4.36538
YLR355C	-1.45078	0.000488972	0.00171029	11.1276
YPL157W	-1.31671	0.000489338	0.0017106	5.68285
YER163C	0.98322	0.000490079	0.00171126	5.9705
YHR112C	0.976382	0.000490083	0.00171126	7.66228
YGR153W	1.34414	0.000494037	0.00172354	3.83654
YBR149W	1.749	0.000494317	0.00172354	8.32555
YLR363C	0.882891	0.000494437	0.00172354	5.66368
YLR067C	-1.02489	0.000498588	0.00173703	5.25788
YKL004W	-1.6106	0.000500001	0.00174096	7.38265
YDR352W	1.02415	0.000500322	0.0017411	7.14385
YAR042W	-0.958184	0.000503753	0.00175205	6.85603
YGL096W	1.44877	0.000504188	0.00175257	4.10646
YPR180W	0.879989	0.000505322	0.00175552	5.97346
YDR310C	-1.13773	0.000505723	0.00175593	6.97279
YKL041W	0.835972	0.00050621	0.00175663	6.40095
YJL071W	1.95642	0.000507552	0.00175992	7.38286
YPL159C	0.937778	0.000507729	0.00175992	6.66851
YDL155W	-1.08581	0.000508958	0.00176319	6.00224
YPL252C	1.23049	0.00051011	0.00176523	7.49168
YER128W	1.09193	0.00051012	0.00176523	4.81425
YNL331C	1.07482	0.000511209	0.001768	4.85418
YNL057W	1.85165	0.000511499	0.00176801	1.84754
YNR021W	-1.00224	0.000515653	0.00178137	8.15893
YNL226W	3.39559	0.00051703	0.00178513	1.56494
YJL144W	2.28076	0.000517565	0.00178597	5.1524
YCL017C	1.0764	0.000518283	0.00178745	7.64808
YCR079W	0.836379	0.00051914	0.00178941	5.82983
YHR088W	-2.10429	0.000521459	0.0017964	6.33667
tH(GUG)K	7.78689	0.000522749	0.00179925	0.0964374
YPL163C	-1.65092	0.000522872	0.00179925	7.22562
YNL092W	2.23389	0.000525916	0.00180872	3.68167
YLR361C	0.897	0.000526404	0.00180938	6.00992
YPL133C	-0.962372	0.000528436	0.00181536	5.12831
YKL065C	1.4027	0.000529114	0.00181588	8.1017
YLL016W	1.37931	0.000529177	0.00181588	5.30437
YBR124W	5.15635	0.000530214	0.00181748	-0.0307574
YHR189W	1.14489	0.000530235	0.00181748	3.7871
YGR099W	-1.18696	0.000530798	0.0018184	5.303
YOR245C	0.847489	0.000531159	0.00181863	6.22587
YLR149C-A	-7.60376	0.000532667	0.00182278	-0.266789
YOL165C	2.91826	0.000534546	0.00182672	0.527455
tL(CAA)G3	5.40014	0.000534728	0.00182672	0.178478
YPL086C	-2.14455	0.000534748	0.00182672	6.50161
YOR161C	-2.08305	0.000535004	0.00182672	6.06905
YIL096C	-2.86245	0.000535321	0.00182679	4.62251
YPL105C	-0.936279	0.000537	0.00183105	7.76447
YPR081C	0.99421	0.000537163	0.00183105	5.58319
YGR273C	5.23332	0.000537587	0.00183148	0.0359523
YLR419W	-1.23423	0.000538009	0.00183191	6.00905
YLL061W	-2.36978	0.000539438	0.00183576	5.79431
YAL048C	1.42024	0.000543941	0.00185006	6.26004
YPL009C	-1.01108	0.000544648	0.00185144	7.54772
YNL194C	2.9053	0.000545684	0.00185394	1.78768
YPL068C	-1.96267	0.00054716	0.00185793	4.08352
YNL113W	-1.71021	0.000548257	0.00186063	6.85938
YIL036W	0.955115	0.000549333	0.00186326	6.70642
YER041W	0.863473	0.000550075	0.0018644	5.73393
YGR195W	-1.42128	0.000550276	0.0018644	5.92446
YNL253W	0.861426	0.00055064	0.00186461	5.73487
YDR402C	2.34031	0.000551357	0.00186601	0.962722
YJR064W	-1.17876	0.000552042	0.00186731	7.85668
YCR024C-B	-1.18174	0.000554731	0.00187537	8.48066
YKR010C	-1.1053	0.000555899	0.00187829	5.63446
YML052W	-1.10603	0.000556549	0.00187882	7.17828
YCR073W-A	0.896429	0.000556697	0.00187882	6.04908
YJR141W	-0.951919	0.000557132	0.00187882	5.18226
YBR223C	0.935641	0.000557274	0.00187882	5.19438
YJL081C	-0.827044	0.000558922	0.00188292	6.68288
YJL047C	1.0474	0.000559101	0.00188292	5.87896
YGL015C	2.27005	0.000562042	0.00189179	1.13244
YFL004W	1.06237	0.000564007	0.00189544	8.68165
YHL031C	-1.14771	0.000564038	0.00189544	4.91387
YPL239W	-1.7835	0.00056405	0.00189544	6.61024
YGL195W	-1.18006	0.000564762	0.0018968	8.08573
YER040W	1.48864	0.000565675	0.00189883	7.22938
YOR193W	1.12384	0.000568324	0.00190669	4.95111
YDL074C	-0.929255	0.00056988	0.00191086	7.1168
YLR364W	-1.86154	0.000575266	0.00192788	4.98546
YIL095W	0.812007	0.000576504	0.00193098	5.86051
YBR198C	-0.977513	0.000577431	0.00193213	7.02873
YDR350C	0.946531	0.000577475	0.00193213	6.53056
YPR082C	0.978731	0.000578017	0.00193234	6.18298
YGR267C	1.1971	0.000578165	0.00193234	8.88956
YER078W-A	3.24901	0.000579175	0.00193467	0.953676
YNR006W	0.933098	0.000580441	0.00193784	6.64689
YDL052C	-0.858582	0.00058285	0.00194473	7.04112
YOR185C	2.66711	0.000583136	0.00194473	6.51075
YCR023C	1.4312	0.000585607	0.00195186	8.13438
YDL112W	-1.96036	0.000585906	0.00195186	6.77924
YGR135W	-0.944553	0.000587007	0.00195447	7.79407
YJL121C	-0.93782	0.000589568	0.00196194	6.57112
YJL002C	-1.00458	0.000593914	0.00197533	8.32029
YMR262W	1.91484	0.00059758	0.00198645	6.09818
YOR281C	-0.83221	0.000598064	0.00198699	6.27269
YNL146C-A	2.13962	0.00059904	0.00198916	1.39822
YPR133C	-0.879889	0.000599534	0.00198973	6.78428
YJL008C	-1.00747	0.000600006	0.00199023	8.02061
YEL034C-A	-2.03466	0.000601762	0.00199498	2.85425
YOL024W	2.2291	0.000605202	0.00200456	1.02947
YCR036W	1.19977	0.000605303	0.00200456	6.92049
YNL141W	-3.55489	0.000606613	0.00200782	6.41512
YAR009C	1.45366	0.000608318	0.00201238	4.93134
YOR021C	-1.70399	0.000610966	0.0020196	6.82145
snR191	-3.89557	0.000611481	0.0020196	0.920575
YLR141W	-1.03495	0.000611482	0.0020196	4.23874
YLR069C	-0.844565	0.000612117	0.00201994	6.1676
YMR063W	1.32748	0.000612241	0.00201994	5.13948
YKL083W	-2.29439	0.000614561	0.00202651	1.17193
YLR090W	0.923947	0.000615112	0.00202724	6.80762
YBL039W-B	1.21555	0.000616565	0.00203094	4.68322
YMR223W	-1.13219	0.000619009	0.0020379	5.16592
YDR077W	1.80184	0.000623203	0.00205062	11.7647
YPL191C	1.4714	0.000623596	0.00205081	4.85721
YMR014W	-1.79355	0.000625162	0.00205487	6.7689
YDL036C	-1.18441	0.000625924	0.00205627	5.2256
YAL044W-A	0.978148	0.000628032	0.0020621	6.09866
YER091C	-1.6216	0.00062855	0.0020627	11.8515
YDR387C	1.04164	0.00063028	0.00206728	6.17635
YLR435W	-1.74714	0.000631138	0.00206888	5.91974
YNL323W	-0.798566	0.000631837	0.00206888	6.25656
YOR008C	-0.866613	0.000631909	0.00206888	7.45118
YHR180W	1.50009	0.000632326	0.00206888	3.56248
YDR476C	1.18148	0.000632989	0.00206888	6.1094
YHL011C	-1.9379	0.000633	0.00206888	7.35147
YGL238W	-1.06861	0.00063342	0.00206888	7.44382
YKL057C	-0.92294	0.000633455	0.00206888	6.75978
YMR201C	0.826336	0.000634316	0.0020706	5.40707
YJR153W	7.58521	0.000635567	0.00207358	-0.0776065
YKL022C	0.836564	0.000635906	0.00207359	6.40089
YIL142W	-0.948181	0.000637701	0.00207768	7.93832
YPR181C	-0.969851	0.000637833	0.00207768	8.10425
YBR061C	-1.22308	0.000640578	0.00208464	5.75466
YFR037C	-0.944448	0.000640647	0.00208464	7.96549
YDR021W	-2.26576	0.000642482	0.00208951	5.16495
YLL019C	0.823472	0.000643062	0.00209029	6.97538
YMR240C	0.990398	0.000648612	0.00210722	6.40516
YER146W	-1.10352	0.000649315	0.00210839	5.94624
YDR163W	0.811101	0.000651283	0.00211367	6.02862
YOR295W	-1.22352	0.000652	0.00211488	4.17839
YAR050W	1.27278	0.000653453	0.00211848	3.60163
YPL113C	1.84867	0.000654069	0.00211936	3.54848
YCL011C	-1.02894	0.000654954	0.00212112	8.20005
YKR074W	-1.12686	0.00065983	0.00213578	5.78486
YPR149W	-3.39164	0.000661655	0.00214057	8.93162
YOR358W	1.03995	0.000664356	0.00214818	5.65812
YDR539W	0.839315	0.000667327	0.00215499	6.5884
YDR298C	0.983125	0.00066735	0.00215499	7.83596
YBR299W	2.49949	0.000667512	0.00215499	1.09058
YDL145C	-0.945631	0.000668081	0.0021557	8.29448
YHR144C	-1.38028	0.000669751	0.00215937	4.9066
YML023C	-1.00985	0.000670242	0.00215937	5.14562
YOR279C	0.855845	0.00067027	0.00215937	5.2925
YMR294W	0.844041	0.000673088	0.00216648	5.55271
YDR481C	1.73969	0.00067318	0.00216648	9.67636
YOR036W	1.87662	0.000673708	0.00216705	6.49067
YHR193C-A	2.29516	0.000675174	0.00217041	1.00776
YOR216C	-0.787806	0.000675458	0.00217041	6.29356
YMR099C	0.942403	0.00067743	0.00217561	7.76709
YDL167C	-1.9106	0.000678518	0.00217797	7.04181
YER098W	0.953908	0.000680011	0.00218094	4.87513
YNR046W	-1.52072	0.000680746	0.00218094	5.8309
YDR503C	-1.25139	0.000680751	0.00218094	3.6804
YAL037C-A	5.01822	0.000680858	0.00218094	-0.147102
YOR032C	1.926	0.000681402	0.00218155	2.3869
YCR104W	3.1339	0.00068187	0.00218163	1.90995
snR62	1.75882	0.000682134	0.00218163	2.80341
YMR066W	0.918277	0.00068665	0.00219457	6.24891
YBR091C	-1.30066	0.000686894	0.00219457	3.92304
YOR195W	-0.916413	0.00068901	0.00220019	6.0422
YOR084W	-1.63609	0.000692861	0.00221134	4.8597
YCR005C	3.31954	0.000695223	0.00221773	11.4268
YLR425W	0.793224	0.000696622	0.00222104	6.18463
YDL113C	1.00954	0.000700173	0.00223121	5.88307
YHR071W	1.50246	0.00070157	0.00223451	10.0338
YNR019W	-1.15398	0.000703671	0.00223952	6.16457
YMR306C-A	2.21515	0.00070387	0.00223952	1.09258
YJR040W	0.818714	0.00070515	0.00224244	6.92434
YOR166C	-0.842674	0.000706047	0.00224413	5.65155
YJL072C	1.47133	0.000706507	0.00224443	6.3318
YGR292W	2.95913	0.000712296	0.00225953	1.29486
YMR251W-A	1.81571	0.000712333	0.00225953	10.6555
YOL116W	0.884708	0.000712461	0.00225953	5.50087
YML127W	-0.897282	0.000712726	0.00225953	6.21589
YIL009W	-1.1554	0.000713323	0.00226006	5.85309
YHR176W	1.44107	0.000713627	0.00226006	5.63089
YPL026C	0.965394	0.000714474	0.00226159	6.969
YLR052W	-1.07654	0.000717321	0.00226926	6.05369
YDR139C	-0.824119	0.000717637	0.00226926	6.11602
YOL047C	1.81453	0.000726581	0.00229637	1.60365
YMR033W	-0.778977	0.000728413	0.00229971	6.59487
YGR088W	1.9784	0.000728515	0.00229971	5.44725
YOR081C	-0.839119	0.000728757	0.00229971	5.82565
YPL201C	-2.25507	0.000729135	0.00229972	1.66963
YJL158C	-1.31073	0.000730059	0.0023004	8.55025
YMR086W	0.949929	0.000730096	0.0023004	7.59221
YJR014W	-0.91655	0.000732107	0.00230556	7.10117
YML103C	-1.14051	0.000735477	0.00231448	7.1211
YKL182W	-1.5722	0.00073569	0.00231448	9.43663
YFL031W	-1.04295	0.000738804	0.00232202	8.84308
YDR194C	-0.940467	0.000738842	0.00232202	7.61331
YDR009W	1.42452	0.000740042	0.00232461	2.64912
YKR064W	0.97038	0.000742701	0.00233177	6.72948
YML094W	-1.11812	0.000744914	0.00233753	5.43831
YFR047C	0.849172	0.000745585	0.00233844	7.48274
YKL124W	1.23265	0.000746139	0.0023386	5.1732
YCL074W	7.76543	0.000746395	0.0023386	0.0768306
YCL038C	1.2472	0.000747098	0.00233962	5.73985
YMR017W	2.01755	0.000747662	0.00234019	1.50272
YMR064W	0.828066	0.000749133	0.00234361	6.8956
YDR036C	0.931632	0.000751485	0.00234977	5.79396
YDR524C-A	3.16848	0.000753268	0.00235415	-0.118866
YKR095W	-0.899796	0.000754713	0.00235748	7.52393
YJL113W	1.02886	0.000757501	0.00236387	4.21542
YJR038C	7.31933	0.000757528	0.00236387	-0.303018
YJL181W	-1.13398	0.000759154	0.00236775	4.24966
YDL223C	0.941882	0.0007611	0.00237262	5.25742
YBR234C	1.03654	0.000762721	0.00237647	8.40906
YER110C	-2.64254	0.000765863	0.00238505	7.85344
YLR328W	-0.869005	0.000767341	0.00238845	6.63834
YDL099W	-0.830845	0.000768097	0.00238938	6.7538
YBR201C-A	1.33873	0.000768417	0.00238938	3.22556
YOR001W	-1.74109	0.000771896	0.00239899	6.7749
YLR011W	0.952422	0.000772388	0.00239931	4.25347
YHR143W-A	-1.33199	0.000774304	0.00240405	6.59641
YNL044W	-1.09555	0.000776433	0.00240932	6.89467
YOR159C	-1.06419	0.000777119	0.00240932	5.71357
YAL012W	-1.26985	0.000777258	0.00240932	8.75528
YPR052C	-1.33036	0.000777564	0.00240932	4.66251
YJL168C	-0.886788	0.000778213	0.00241011	6.345
YIL159W	-0.990395	0.000780971	0.00241744	4.88186
YLR252W	2.27593	0.000782981	0.00242147	1.70586
YLR047C	-0.842896	0.000783058	0.00242147	4.82972
YPL193W	-1.71185	0.00078549	0.00242777	5.39077
YBR046C	2.74683	0.00078701	0.00243118	7.82942
YKL073W	-0.909321	0.000787383	0.00243118	6.43534
snR85	-3.3789	0.000793168	0.00244782	-0.112535
YDR509W	-4.04333	0.00079683	0.00245789	-0.630169
tK(CUU)M	2.28572	0.000797892	0.00245993	0.744085
[truncated: 4,164 more rows]

## Sheet: deseq2_common_up_1155
targetID	baseMean	log2FoldChange	lfcSE	pvalue	padj
YIR028W	4920.64	9.31179	0.370115	0	0
YNL117W	6482.89	8.5452	0.265037	0	0
YJR152W	86382.7	8.25722	0.301897	0	0
YCL048W-A	602.162	8.16971	0.578759	0	0
YLR053C	3244.35	8.11234	0.347519	0	0
YKR034W	4699.8	7.32906	0.357217	0	0
YDR371C-A	100.622	7.18869	1.00532	0	0
YAL062W	7601.39	6.91713	0.216691	0	0
YMR107W	1586.2	6.60093	0.447136	0	0
YLR155C	198.564	6.35168	0.562816	0	0
YIR027C	1043.65	6.25917	0.307172	0	0
YDR242W	20198.4	6.14247	0.272041	0	0
YLR307C-A	180.985	6.04783	0.546289	0	0
YOR100C	5056.92	5.77498	0.366997	0	0
YLR160C	338.961	5.7413	0.477273	0	0
YIR029W	5544.84	5.68078	0.200276	0	0
YPL054W	460.221	5.61063	0.343081	0	0
YLR311C	73.9247	5.50793	0.716556	0	0
YPR001W	1896.94	5.43801	0.2953	0	0
YLR312C	830.756	5.43155	0.430233	0	0
YBL049W	582.346	5.42413	0.319816	0	0
YDL210W	1276.35	5.36612	0.262047	0	0
YIR031C	15976.6	5.35723	0.257695	0	0
YDR119W-A	1210.3	5.29301	0.311314	0	0
YKR093W	8739.71	5.28392	0.326001	0	0
YIR030C	1310.82	5.1155	0.231887	0	0
YOR348C	1825.52	5.07205	0.346588	0	0
YOR391C	73.9903	5.04898	0.634745	0	0
YMR088C	33079	4.96645	0.207327	0	0
YLR142W	2116.05	4.87814	0.214084	0	0
YEL059W	65.8827	4.86336	0.642952	0	0
YBR285W	394.636	4.83828	0.353884	0	0
YGR087C	835.601	4.80583	0.262647	0	0
YPL033C	1075.21	4.79444	0.465904	0	0
YDL085W	831.686	4.74418	0.423528	0	0
YJL172W	49596	4.70449	0.268995	0	0
YMR322C	71.4901	4.63543	0.582817	0	0
YDL238C	3135.49	4.61588	0.333308	0	0
HRA1	245.797	4.48728	0.39234	0	0
YMR170C	3245.08	4.39931	0.201655	0	0
YNL142W	67802.7	4.3299	0.362483	0	0
YBL048W	46.936	4.32184	0.677613	0	2.05889e-10
YHR028W-A	79.6902	4.26556	0.514956	0	0
YIR032C	3386.39	4.24191	0.309314	0	0
YKL103C	10910.6	4.22241	0.337789	0	0
YOR003W	3242.89	4.21414	0.211684	0	0
YMR118C	55.4911	4.19126	0.658501	0	1.49225e-10
YOR329W-A	74.8272	4.16697	0.524479	0	0
YDL169C	1148.95	4.15501	0.403151	0	0
YPL107W	5394.57	4.12499	0.199028	0	0
YGR161C	5595.32	4.11265	0.396733	0	0
YHL016C	6499.72	4.06343	0.338118	0	0
YAR035W	1443.05	4.0454	0.289675	0	0
YKR091W	2059.42	4.02826	0.290273	0	0
YDL239C	2760.37	3.98037	0.316212	0	0
YDR170W-A	1088.97	3.97743	0.269611	0	0
YOR298W	990.339	3.91644	0.313096	0	0
YGL062W	36221.4	3.88329	0.35862	0	0
YDR070C	397.166	3.88227	0.463732	0	0
YER175C	18668.2	3.88186	0.412639	0	0
YLR205C	763.891	3.87685	0.259777	0	0
YBR203W	1347.98	3.87373	0.243983	0	0
YER024W	15774	3.86788	0.441123	0	0
YDR453C	1157.88	3.86366	0.350359	0	0
YIL037C	266.82	3.84226	0.307182	0	0
YBR012C	1099.01	3.82714	0.25383	0	0
YJL089W	542.817	3.81409	0.335196	0	0
tN(GUU)N1	83.2594	3.76675	0.486835	0	0
YOR134W	102.959	3.74831	0.450837	0	0
YPL280W	78.1082	3.73356	0.538541	0	0
YJL213W	6813.14	3.71683	0.216538	0	0
YDR090C	8004.46	3.70966	0.208421	0	0
YNR068C	4376.01	3.70916	0.334946	0	0
YGL196W	5451.16	3.6895	0.260318	0	0
YDR540C	727.103	3.65679	0.307313	0	0
YGR154C	2659.12	3.61146	0.284646	0	0
YGR043C	447.95	3.61054	0.252148	0	0
YNR069C	4640.8	3.58381	0.370676	0	0
YGR190C	66.6632	3.57544	0.51148	0	0
YPR099C	165.933	3.57317	0.361102	0	0
YPL017C	326.055	3.54948	0.301716	0	0
YLR164W	1228.04	3.52984	0.290543	0	0
YLR004C	360.064	3.52834	0.348037	0	0
YDR461W	200.546	3.48339	0.35566	0	0
YOR178C	126.318	3.46705	0.419543	0	0
YPL269W	4925.81	3.46307	0.211725	0	0
YIL117C	2434.56	3.45995	0.252723	0	0
YLR161W	72.719	3.45852	0.523655	0	0
YGL205W	385.289	3.4525	0.307815	0	0
YGL156W	1132.56	3.42021	0.348265	0	0
YCL027W	196.378	3.4133	0.3129	0	0
YMR271C	1479.4	3.40791	0.250132	0	0
YIR039C	679.683	3.39722	0.287859	0	0
YNL239W	24319.5	3.39262	0.218995	0	0
YKR015C	65.9202	3.39074	0.482332	0	0
YIR042C	1719.73	3.37476	0.220894	0	0
YMR195W	6034.8	3.30204	0.29247	0	0
YER119C-A	65.0692	3.28971	0.484422	0	0
YGL121C	320.248	3.27349	0.288747	0	0
YJR148W	32069.8	3.27281	0.178563	0	0
YHR006W	8866.85	3.23724	0.194191	0	0
YLL046C	69.1327	3.23052	0.478009	0	0
YMR046W-A	241.282	3.21788	0.323616	0	0
YCR005C	42408.4	3.21143	0.407984	0	0
YKR039W	60552.2	3.20379	0.325268	0	0
YKR097W	371.385	3.19607	0.28146	0	0
YML042W	739.579	3.18809	0.22533	0	0
YER175W-A	115.973	3.18284	0.405679	0	0
YDL069C	1417.62	3.17539	0.213717	0	0
YLR149C	576.549	3.1685	0.319855	0	0
YDR317W	134.707	3.14378	0.397495	0	0
YGL259W	77.3939	3.1365	0.482946	0	0
YDR380W	231.311	3.12609	0.408778	0	0
YNL335W	94.7283	3.11954	0.409324	0	0
YER060W	388.137	3.11954	0.272663	0	0
YPR194C	17077	3.11053	0.206501	0	0
YPL272C	1136.02	3.1092	0.242027	0	0
YNR064C	77.4137	3.10164	0.443269	0	0
YPR145C-A	74.2437	3.07954	0.48375	0	1.38645e-10
YCR018C	353.198	3.07902	0.333761	0	0
YJL161W	314.963	3.06292	0.34323	0	0
YPL185W	67.5454	3.05535	0.470687	0	0
YHR096C	242.489	3.04069	0.298916	0	0
YER037W	1503	3.02692	0.398481	0	0
YPL265W	36175.5	3.01495	0.335107	0	0
YKR046C	3114.01	3.01408	0.343431	0	0
YKL188C	1337.83	2.98708	0.273868	0	0
YPL223C	133.411	2.97902	0.356047	0	0
YHR029C	18702.1	2.96828	0.214166	0	0
YIL089W	357.134	2.96548	0.260492	0	0
YGR019W	6600.95	2.94692	0.302087	0	0
YNL284C-B	3301.92	2.94264	0.223991	0	0
YBR047W	1349.63	2.93696	0.392371	0	0
YDL170W	9912.11	2.93533	0.287374	0	0
YKL162C-A	84.1595	2.92452	0.40804	0	0
YIL164C	7795.87	2.88913	0.319679	0	0
YOR328W	2764.76	2.8726	0.217957	0	0
YJR154W	1560.14	2.87227	0.337875	0	0
YJR130C	8814.1	2.81406	0.365561	0	0
YGR174W-A	109.312	2.80776	0.421813	0	0
YGL104C	879.563	2.80598	0.308217	0	0
YJR155W	1733.34	2.79355	0.318835	0	0
YOL119C	14455	2.78696	0.288759	0	0
YDL066W	57292.5	2.78541	0.264022	0	0
YFL061W	84.3026	2.78439	0.414095	0	0
YMR279C	208.664	2.78328	0.34633	0	0
YIL146C	1982.86	2.78153	0.195417	0	0
YLR251W	355.084	2.7663	0.328661	0	0
YIL099W	116.821	2.7414	0.443201	0	4.27305e-10
YLR089C	18379.5	2.74123	0.181998	0	0
YJR025C	6474.52	2.73867	0.187145	0	0
YIL165C	5373.97	2.73364	0.289687	0	0
YDL057W	868.114	2.71828	0.220485	0	0
YJR008W	1063.42	2.71769	0.214138	0	0
YEL060C	11916.9	2.71371	0.288426	0	0
YEL059C-A	304.938	2.69876	0.271027	0	0
YBR297W	764.776	2.69859	0.32468	0	0
YIL101C	131.515	2.6951	0.37052	0	0
YMR174C	560.266	2.69508	0.260495	0	0
YNL054W-B	5582.15	2.68237	0.248106	0	0
YGL249W	160.414	2.67713	0.327935	0	0
YJR078W	202.848	2.67033	0.314444	0	0
YHR209W	527.785	2.65889	0.244253	0	0
YPR151C	136.295	2.65657	0.325201	0	0
YDL054C	6002.3	2.64999	0.268345	0	0
YAL061W	591.376	2.64411	0.304704	0	0
YCR100C	798.005	2.63623	0.236064	0	0
YBR046C	3503.2	2.62715	0.39051	0	0
YGL180W	2073.5	2.62477	0.403416	0	0
YMR156C	678.574	2.61634	0.239996	0	0
YMR196W	2931.64	2.61622	0.306313	0	0
YBR045C	372.815	2.61219	0.361313	0	0
tD(GUC)N	154.695	2.61185	0.340719	0	0
YDR085C	573.191	2.60442	0.238666	0	0
YAL037W	348.052	2.58827	0.271927	0	0
YPR193C	138.771	2.58479	0.321394	0	0
YDR210C-D	547.29	2.57592	0.292564	0	0
YNL145W	142.742	2.55322	0.333647	0	0
YOR185C	1403.71	2.553	0.379867	0	0
YLR054C	130.438	2.54471	0.353175	0	0
YCR099C	663.901	2.53971	0.212279	0	0
YLR037C	243.267	2.53774	0.268241	0	0
YKL218C	12326.2	2.53197	0.272254	0	0
YGR067C	260.179	2.52752	0.281756	0	0
YCR020C	453.234	2.52484	0.255643	0	0
YER023C-A	108.823	2.51858	0.368035	0	0
YER065C	1207.69	2.50615	0.246009	0	0
YPL213W	1255.83	2.49653	0.208258	0	0
YOR366W	193.541	2.49638	0.299496	0	0
YFR055W	10163.2	2.49534	0.196165	0	0
YLR346C	146.585	2.4887	0.342658	0	0
YIR007W	988.334	2.48861	0.209367	0	0
YNL015W	1924.77	2.48115	0.286027	0	0
YPL134C	1524.11	2.47571	0.200624	0	0
YCR073C	1970.99	2.47218	0.251673	0	0
YCR101C	477.318	2.47034	0.2929	0	0
YKL089W	2048.21	2.46931	0.224617	0	0
YMR280C	174.7	2.46661	0.298528	0	0
YLL058W	747.32	2.4657	0.222834	0	0
YHL021C	1200.93	2.45209	0.34317	0	0
YBR085C-A	6611.29	2.45048	0.291338	0	0
YDR098C-B	272.371	2.44974	0.340223	0	0
YDR080W	3797.47	2.44387	0.255496	0	0
YCL064C	451.076	2.43112	0.322925	0	0
YJR011C	968.005	2.42593	0.226183	0	0
YIR017C	2656.67	2.42515	0.233967	0	0
YGL248W	2070.41	2.42334	0.269204	0	0
YJL217W	2988.33	2.42014	0.222304	0	0
RME3	251.613	2.41891	0.283554	0	0
YDL024C	113.636	2.41681	0.354162	0	0
YBL078C	746.2	2.40721	0.327052	0	0
YDR076W	1095.95	2.39831	0.237508	0	0
YLR178C	1519.67	2.39764	0.320184	0	0
YOL128C	959.032	2.39334	0.281971	0	0
YBR033W	145.513	2.38916	0.310034	0	0
YDL067C	10024.9	2.38868	0.229507	0	0
YDR126W	946.62	2.38359	0.261714	0	0
YEL066W	1973.99	2.37043	0.223529	0	0
YHR022C	134.773	2.36762	0.320616	0	0
YPR061C	844.84	2.35106	0.201326	0	0
YOL159C	1030.3	2.3419	0.205945	0	0
YER185W	168.485	2.3368	0.370085	0	2.26243e-10
YJL077C	140.839	2.33061	0.322625	0	0
YNR065C	3729.99	2.32096	0.250492	0	0
YGR230W	500.558	2.31924	0.231803	0	0
YIL066C	205.294	2.31833	0.34071	0	0
YHR015W	182.086	2.31733	0.32043	0	0
YLR227W-B	779.366	2.31633	0.249008	0	0
YLR356W	1914.54	2.31241	0.277066	0	0
YLL056C	210.491	2.29939	0.290779	0	0
YPR170C	89.3174	2.29775	0.369254	0	4.38955e-10
YER039C	422.609	2.29489	0.301388	0	0
YJR149W	973.443	2.28832	0.201904	0	0
YOR376W-A	139.635	2.28412	0.340699	0	0
YPL229W	1102.86	2.27953	0.203616	0	0
YIL111W	2960.04	2.26607	0.25506	0	0
YKL151C	1364.43	2.25488	0.236618	0	0
YDR315C	711.131	2.24919	0.277944	0	0
YJR036C	520.163	2.23599	0.263022	0	0
YNL040W	2735.47	2.23091	0.205517	0	0
YEL041W	603.229	2.22727	0.239053	0	0
YOL091W	590.946	2.22414	0.263619	0	0
YGR044C	872.79	2.22349	0.236153	0	0
YMR226C	11202	2.21741	0.192072	0	0
YNL168C	2865.65	2.19119	0.180013	0	0
YER138W-A	299.861	2.18759	0.332018	0	0
YJL206C	974.894	2.18179	0.203557	0	0
YPL088W	1095.75	2.17941	0.196228	0	0
YHR202W	1315.37	2.17136	0.262239	0	0
YNL293W	1631.77	2.16956	0.224695	0	0
YEL071W	47292	2.16947	0.274211	0	0
YHR122W	4388.61	2.16884	0.245559	0	0
YJL133C-A	11969.3	2.1681	0.258441	0	0
YFL041W-A	207.481	2.16524	0.331717	0	0
YER188W	358.482	2.16297	0.252649	0	0
YKR076W	686.763	2.1611	0.315827	0	0
YMR020W	1322.48	2.15962	0.214484	0	0
YNR066C	726.942	2.14595	0.308155	0	0
YKL209C	1034.98	2.12932	0.223295	0	0
YBL015W	1727.7	2.11083	0.270432	0	0
YDR022C	568.436	2.10039	0.223974	0	0
YNL125C	2125.88	2.10011	0.219807	0	0
YCL034W	3592.14	2.0917	0.203726	0	0
YFR044C	9054.81	2.09042	0.172996	0	0
YIL092W	1961.75	2.0885	0.24758	0	0
YJL199C	484.145	2.08821	0.267699	0	0
YKL161C	1192.84	2.08488	0.206572	0	0
YHR171W	637.885	2.07125	0.317997	0	0
YHR210C	229.709	2.06475	0.312373	0	0
YDR530C	1736.09	2.0616	0.23749	0	0
YDR421W	1430.64	2.05252	0.206467	0	0
YOL110W	969.901	2.05097	0.196562	0	0
YJR096W	910.739	2.04562	0.245942	0	0
YNL311C	3291.81	2.04541	0.252793	0	0
YPL166W	427.231	2.0436	0.2996	0	0
YLL039C	11152.7	2.04326	0.254519	0	0
YGR161C-D	608.836	2.03016	0.32446	0	3.99669e-10
YML118W	330.667	2.02794	0.315982	0	1.49704e-10
YNL314W	1086.49	2.02712	0.206514	0	0
YPR158C-D	905.484	2.02435	0.290661	0	0
YOL019W	5322.51	2.01595	0.246488	0	0
YOR130C	4696.27	1.99491	0.299603	0	0
YGL185C	407.173	1.98099	0.241204	0	0
YIR005W	885.09	1.97778	0.214681	0	0
YMR155W	1882.11	1.97573	0.193645	0	0
YHR047C	3505.49	1.97332	0.201259	0	0
YEL012W	993.494	1.97143	0.250654	0	0
YOR221C	3161.7	1.97059	0.240345	0	0
YER184C	720.442	1.96598	0.240862	0	0
YGR161W-C	496.341	1.96592	0.248602	0	0
YLR126C	1507.61	1.96458	0.205703	0	0
YGL202W	41408.9	1.96323	0.198916	0	0
YIR038C	2788.73	1.95608	0.248335	0	0
YJL185C	477.299	1.94849	0.265954	0	0
YKL217W	162.207	1.94535	0.294053	0	0
YLL057C	270.275	1.94172	0.250464	0	0
YBR128C	309.853	1.93696	0.303347	0	1.97687e-10
YER119C	2537.59	1.9318	0.257836	0	0
YGR032W	4373.54	1.93171	0.253529	0	0
YBR157C	155.036	1.93025	0.295498	0	0
YKL084W	1064.18	1.92961	0.251091	0	0
YBR235W	4500.72	1.92875	0.19485	0	0
YGL159W	1296.34	1.92871	0.200218	0	0
YEL072W	2026.54	1.92433	0.186071	0	0
YCR007C	256.796	1.9241	0.269836	0	0
YBR295W	1207.6	1.92305	0.199442	0	0
YJR027W	554.362	1.92273	0.280787	0	0
YMR041C	781.505	1.92188	0.21124	0	0
YDR533C	2323.15	1.91996	0.222023	0	0
YMR019W	4390.69	1.91968	0.244244	0	0
YOR020W-A	981.249	1.9155	0.232679	0	0
YHR030C	3602.52	1.91488	0.182521	0	0
YBL095W	1362.23	1.9134	0.197508	0	0
YDL149W	1015.66	1.91025	0.193821	0	0
YDR059C	1134.14	1.90565	0.27833	0	0
YOL138C	2121.5	1.90373	0.201951	0	0
YOR337W	4820.52	1.89885	0.205419	0	0
YOR111W	1138.67	1.88928	0.203596	0	0
YIL056W	3568.68	1.88889	0.286215	0	0
YCL049C	1235.97	1.88723	0.248485	0	0
YML054C	521.943	1.88448	0.221497	0	0
YIL073C	152.525	1.88186	0.293381	0	1.73934e-10
YBL005W-B	1321.19	1.87983	0.224039	0	0
YMR169C	387.716	1.87889	0.273955	0	0
YIL083C	2254.99	1.87772	0.214409	0	0
YDL171C	20963.8	1.87668	0.190224	0	0
YGR288W	610.486	1.87337	0.251491	0	0
YOR040W	516.021	1.87281	0.224477	0	0
YLR351C	5557.55	1.86969	0.188641	0	0
YFR029W	1456.7	1.8671	0.193135	0	0
YPR195C	306.709	1.86698	0.279125	0	0
YGL154C	975.544	1.86572	0.245652	0	0
YJL103C	343.678	1.86378	0.289425	0	1.49704e-10
YJL071W	2573.05	1.86181	0.296978	0	4.27305e-10
YGR038C-B	2363.56	1.86177	0.199413	0	0
YDL215C	3661.02	1.86087	0.224963	0	0
YLR097C	1696.07	1.85156	0.194292	0	0
YJR138W	2256.21	1.84968	0.198591	0	0
YOL025W	931.974	1.84648	0.209714	0	0
YOR202W	7979.77	1.84442	0.215468	0	0
YOL117W	772.128	1.84371	0.241955	0	0
YNL101W	6181.55	1.83755	0.218278	0	0
YGL229C	1056.87	1.82833	0.269818	0	0
YCR068W	1476.94	1.82484	0.220348	0	0
YPL188W	2808.27	1.82392	0.212376	0	0
YMR181C	1337.08	1.82385	0.238429	0	0
YGR197C	1183.06	1.82197	0.277773	0	0
YBR241C	1439.92	1.8167	0.238684	0	0
YJR119C	553.268	1.8164	0.241793	0	0
YPL036W	865.439	1.80632	0.273176	0	0
YIL009C-A	933.814	1.79785	0.198418	0	0
YPR058W	5340.73	1.78867	0.185939	0	0
YPL119C	324.857	1.78621	0.241754	0	0
YGR023W	998.459	1.78117	0.228008	0	0
YMR104C	1228.98	1.78017	0.224142	0	0
YEL058W	5214.66	1.77119	0.173875	0	0
YER176W	4630.17	1.76777	0.239371	0	0
YFR008W	476.486	1.7669	0.229809	0	0
YNL116W	2076.85	1.76234	0.196138	0	0
YDL142C	1009.6	1.76124	0.23506	0	0
YBR228W	1296.75	1.75757	0.189346	0	0
YDR001C	4688.53	1.75615	0.201592	0	0
YOL016C	2508	1.75061	0.270205	0	1.23374e-10
YJL155C	1032.02	1.75052	0.227284	0	0
YDR461C-A	538.151	1.73565	0.2354	0	0
YJL173C	2057.09	1.73527	0.186536	0	0
YGR110W	665.954	1.73455	0.267344	0	1.22201e-10
YEL064C	1022.95	1.73341	0.213979	0	0
YLR189C	2971.93	1.72974	0.213885	0	0
YMR251W-A	24957.6	1.72713	0.268804	0	1.49225e-10
YER081W	12238.2	1.72352	0.254341	0	0
YMR103C	357.017	1.72106	0.244988	0	0
YDR077W	53817.4	1.72037	0.236977	0	0
YNL278W	1295.64	1.71632	0.189179	0	0
YOR363C	2623.18	1.71388	0.233103	0	0
YLR001C	1759.49	1.70944	0.210501	0	0
YNL004W	8941.94	1.703	0.1756	0	0
YGR080W	1985.71	1.69838	0.217231	0	0
YOL044W	852.307	1.69786	0.204772	0	0
YKL023W	1827.19	1.69107	0.241823	0	0
YPR066W	321.321	1.68528	0.249175	0	0
YHR037W	3739.53	1.68238	0.227284	0	0
YOL107W	825.265	1.68123	0.220241	0	0
YKR005C	299.225	1.67797	0.250678	0	0
YJR039W	999.76	1.66706	0.262582	0	3.13847e-10
YKR096W	2780.66	1.666	0.185332	0	0
YDR391C	1116.73	1.66584	0.223406	0	0
YLR246W	1578.87	1.66413	0.185152	0	0
YFR025C	4293.49	1.65703	0.209432	0	0
YIL045W	548.989	1.65094	0.244436	0	0
YHR067W	966.352	1.64994	0.197637	0	0
YER066W	242.845	1.64669	0.262043	0	4.80335e-10
YMR008C	3160.1	1.64546	0.224346	0	0
YDR481C	12642.8	1.64532	0.263862	0	4.7714e-10
YPR046W	552.29	1.64057	0.228079	0	0
YGR244C	6235.56	1.63558	0.253531	0	1.69228e-10
YEL062W	977.748	1.63341	0.199622	0	0
YKL129C	1451.91	1.63242	0.247853	0	0
YIL059C	725.671	1.62609	0.206225	0	0
YPR111W	1805.85	1.6242	0.25469	0	2.72508e-10
YGL114W	5181.52	1.62135	0.220604	0	0
YGR183C	1793.45	1.61998	0.219318	0	0
YLL060C	450.427	1.61889	0.234477	0	0
YNL183C	2289.27	1.61849	0.25698	0	4.22115e-10
YDL200C	709.264	1.6183	0.22801	0	0
YJR019C	780.708	1.61808	0.234675	0	0
YAL063C	386.18	1.61685	0.234619	0	0
YDL206W	899.673	1.61489	0.233844	0	0
YER174C	1838.9	1.61302	0.199738	0	0
YMR253C	996.123	1.61246	0.242653	0	0
YGR028W	1416.3	1.61188	0.19544	0	0
YER160C	420.643	1.60922	0.223134	0	0
YJL060W	5104.32	1.60789	0.232794	0	0
YMR135C	3258.56	1.60777	0.214913	0	0
YNR074C	1934.14	1.60343	0.18499	0	0
YMR106C	736.309	1.60305	0.233829	0	0
YFR046C	937.556	1.603	0.198249	0	0
YPL214C	1496.48	1.60272	0.195324	0	0
YOR035C	1390.07	1.60075	0.202404	0	0
YPL031C	3203.16	1.59034	0.207372	0	0
YDR425W	1306.73	1.58856	0.219174	0	0
YKL155C	2053.65	1.58578	0.212819	0	0
YML098W	2143.31	1.58261	0.187113	0	0
YNL242W	1389.73	1.58155	0.223653	0	0
YDR287W	1297.76	1.57537	0.202989	0	0
YER010C	1510.39	1.57063	0.20859	0	0
YMR096W	62043.4	1.56078	0.215562	0	0
YFL028C	3525.05	1.56021	0.246318	0	3.48127e-10
YLL063C	447.396	1.55464	0.223959	0	0
YPL222W	701.524	1.55063	0.244223	0	3.5281e-10
YFL042C	1453.14	1.54936	0.213649	0	0
YMR026C	1783.9	1.54628	0.210584	0	0
YKR004C	789.489	1.54279	0.221319	0	0
YMR255W	2196.26	1.53701	0.183094	0	0
YMR090W	1039.24	1.53629	0.234235	0	0
YBR105C	4316.8	1.53331	0.179026	0	0
YPR083W	1429.46	1.52683	0.240907	0	3.83037e-10
YPL047W	1117.42	1.52451	0.203716	0	0
YOR019W	630.044	1.51652	0.208077	0	0
YBR227C	2315.62	1.514	0.199287	0	0
YKL220C	397.551	1.51022	0.225782	0	0
YMR095C	4839.36	1.50536	0.203681	0	0
YMR154C	588.038	1.50501	0.232429	0	1.65726e-10
YPL150W	2182.53	1.50313	0.183124	0	0
YLR094C	1515.34	1.50263	0.207535	0	0
YJL056C	1592.8	1.48569	0.202841	0	0
YHR075C	367.968	1.4794	0.224733	0	0
YDR041W	1876.26	1.47352	0.185974	0	0
YOR208W	1163.71	1.46258	0.20586	0	0
YJR004C	1183.19	1.45991	0.200159	0	0
YGL005C	2361.5	1.45724	0.184088	0	0
YLR193C	1345.8	1.45023	0.194635	0	0
YPL052W	1439.87	1.43714	0.206598	0	0
YPL262W	6728.27	1.43678	0.208016	0	0
YIL121W	11712.9	1.42886	0.210019	0	0
YNL294C	3042.03	1.42223	0.194075	0	0
YNL046W	1459.02	1.42086	0.185132	0	0
YAL030W	1442.25	1.41939	0.22438	0	4.64872e-10
YHR113W	2702.8	1.41834	0.198316	0	0
YER045C	664.279	1.41701	0.21179	0	0
YMR287C	1265.48	1.41375	0.217028	0	1.42311e-10
YGR182C	606.127	1.40919	0.209326	0	0
YBR166C	2424.34	1.40543	0.200916	0	0
YKR101W	743.393	1.4049	0.201778	0	0
YBL089W	1496.37	1.40252	0.200775	0	0
YPR003C	1276.91	1.40096	0.220662	0	4.06211e-10
YBR104W	4306.99	1.39326	0.219312	0	4.01186e-10
YJL210W	1445.24	1.39107	0.215902	0	2.27829e-10
YIL046W	2407.16	1.39014	0.187891	0	0
YMR178W	2248.81	1.38853	0.188813	0	0
YOR011W	1671.28	1.38325	0.193029	0	0
YOR375C	47342.7	1.37845	0.212066	0	1.72941e-10
YMR077C	806.607	1.37351	0.202849	0	0
YJR131W	1373.43	1.37284	0.211954	0	1.8655e-10
YOL112W	2492.57	1.36716	0.180691	0	0
YDR272W	2073.52	1.3576	0.187936	0	0
YLR100W	3668.63	1.35655	0.190092	0	0
YDR131C	646.833	1.35603	0.205372	0	0
YBR035C	6035.35	1.35252	0.212015	0	3.56178e-10
YPR198W	2698.75	1.34395	0.202862	0	0
YFL021W	2739.37	1.336	0.195201	0	0
YMR252C	648.456	1.33189	0.203636	0	1.2979e-10
YBR081C	2747.55	1.32844	0.182679	0	0
YHL023C	2668.68	1.32825	0.180492	0	0
YKL168C	1095.95	1.32143	0.194702	0	0
YKL197C	1524.55	1.31102	0.194065	0	0
YIL026C	2148.94	1.30614	0.189937	0	0
YMR238W	4903.63	1.30556	0.20088	0	1.82548e-10
YKR014C	3955.9	1.30163	0.202386	0	2.75949e-10
YHR106W	1063.99	1.29653	0.190817	0	0
YDL236W	5137.45	1.29286	0.182357	0	0
YBR007C	1564.59	1.27839	0.189251	0	0
YMR221C	3552.73	1.27791	0.189647	0	0
YPR057W	1866.58	1.27125	0.184783	0	0
YKR021W	2203.4	1.25798	0.188984	0	0
YOL133W	1313.9	1.24173	0.192727	0	2.67015e-10
YLR348C	5820.36	1.2363	0.183116	0	0
YFR006W	3539.45	1.22743	0.186059	0	1.02057e-10
YHR074W	3559.76	1.22619	0.180923	0	0
YAL056W	3769.55	1.21689	0.179167	0	0
YDL231C	4052.8	1.19568	0.184286	0	2.11693e-10
YOL036W	3781.12	1.18434	0.177014	0	0
YEL006W	2461.13	1.17642	0.178783	0	1.19586e-10
YIL007C	629.454	1.57992	0.25134	1.02396e-10	5.03244e-10
YIL042C	1080.49	1.46053	0.231776	1.04472e-10	5.13036e-10
YBL102W	3598.3	1.3966	0.221299	1.04976e-10	5.14695e-10
YJL144W	544.443	2.17106	0.350926	1.11674e-10	5.4623e-10
YJL127C-B	1255.22	1.28644	0.203556	1.13078e-10	5.52657e-10
YKL157W	5454.77	1.26461	0.20029	1.21342e-10	5.92107e-10
YPL250C	7694.72	2.34605	0.380367	1.22701e-10	5.98267e-10
YJR110W	1381.2	1.30604	0.20755	1.31003e-10	6.3723e-10
YPL186C	312.527	1.62094	0.259885	1.35332e-10	6.57249e-10
YFL030W	437.979	2.04251	0.330836	1.36486e-10	6.62333e-10
YBR186W	45.9764	3.91456	0.637424	1.40049e-10	6.79089e-10
YKL096C-B	73.6114	2.50663	0.408303	1.4052e-10	6.80836e-10
YPL274W	5086.23	1.23145	0.195658	1.41055e-10	6.82894e-10
YHR071W	16216.3	1.42403	0.229452	1.72277e-10	8.31435e-10
YGL224C	6989.9	2.06557	0.336972	1.74548e-10	8.4108e-10
YCL039W	1303.38	1.29467	0.208099	1.82562e-10	8.76952e-10
YFL010C	5071.95	1.1531	0.184501	1.84873e-10	8.87362e-10
YHL027W	4321.21	1.33683	0.214674	1.9272e-10	9.23586e-10
YGL007W	60.0884	3.46168	0.573513	1.97496e-10	9.45739e-10
YPL110C	1604.73	1.29744	0.2083	1.98707e-10	9.50801e-10
YMR042W	1134.87	1.39529	0.224796	2.04256e-10	9.76421e-10
YGL219C	2382.21	1.50579	0.243293	2.04378e-10	9.76421e-10
YPL123C	1143.7	2.41203	0.398904	2.15122e-10	1.02537e-09
YBR149W	4960.68	1.66015	0.271317	2.31039e-10	1.09953e-09
YGR122C-A	112.247	1.99295	0.326805	2.3756e-10	1.12969e-09
YNL009W	408.739	1.37237	0.221893	2.42884e-10	1.15412e-09
YDL086W	3294.79	1.11819	0.179645	2.49944e-10	1.18493e-09
YMR050C	230.183	1.95338	0.320831	2.51603e-10	1.19187e-09
YNR056C	164.669	1.93583	0.318037	2.61228e-10	1.23462e-09
YIL088C	6866.85	1.25785	0.203929	2.73803e-10	1.28911e-09
YPL006W	2622.12	1.20529	0.194626	2.77749e-10	1.3037e-09
YDL032W	41.5534	4.35562	0.715166	2.91892e-10	1.36905e-09
YGL140C	5242.14	1.23077	0.199157	2.92309e-10	1.36996e-09
YBR256C	12823.7	1.77351	0.29121	2.92875e-10	1.37157e-09
YHR044C	448.018	1.36078	0.221059	2.95484e-10	1.38064e-09
YBR109C	6674.82	1.14555	0.184979	2.97382e-10	1.38816e-09
YAL015C	1017.17	1.21644	0.196866	2.97542e-10	1.38816e-09
YLL059C	139.472	1.86391	0.30678	2.98176e-10	1.39006e-09
YDL138W	1706.71	1.27468	0.206873	3.12499e-10	1.45353e-09
tF(GAA)D	45.0966	3.88024	0.646021	3.13605e-10	1.45758e-09
YLR080W	391.726	1.82248	0.300254	3.18454e-10	1.479e-09
YNL104C	57099.5	1.67975	0.273016	3.19122e-10	1.48099e-09
YBR012W-B	245.283	1.98545	0.329558	3.54779e-10	1.64275e-09
YLR362W	1211.94	1.14785	0.186259	3.57549e-10	1.65433e-09
YOR238W	971.666	1.44876	0.237433	3.71009e-10	1.71404e-09
YGL045W	684.211	1.27145	0.207335	3.76453e-10	1.73659e-09
YNL014W	508.508	1.36581	0.223771	4.06965e-10	1.86895e-09
YPL071C	955.95	1.17264	0.191555	4.5186e-10	2.06588e-09
YHR175W	1962.68	1.29141	0.212171	4.89264e-10	2.23028e-09
YJL147C	640.742	1.24229	0.203824	4.90743e-10	2.23536e-09
YIL028W	187.81	1.64098	0.272714	5.29371e-10	2.40421e-09
YIL166C	156.523	1.7323	0.28861	5.33876e-10	2.42289e-09
YGL053W	674.254	1.50171	0.24894	5.56691e-10	2.51901e-09
YDL159W	969.199	1.29755	0.214805	6.46075e-10	2.91064e-09
YJL110C	1943.64	1.21413	0.200523	6.49564e-10	2.92423e-09
YKL061W	546.312	1.40841	0.234028	6.61924e-10	2.97552e-09
YDL230W	918.222	1.52957	0.255438	6.96855e-10	3.12343e-09
YPR007C	49.5789	2.99654	0.511029	7.01361e-10	3.14134e-09
YCR107W	835.047	1.22739	0.203755	7.73314e-10	3.45608e-09
YAL053W	4396.22	1.11403	0.184484	8.05568e-10	3.59762e-09
YGL039W	1377.14	1.12303	0.186062	8.07155e-10	3.6021e-09
YBR250W	174.326	1.96237	0.332674	8.09213e-10	3.60867e-09
YPR002W	2990.65	2.43355	0.417587	8.40295e-10	3.74186e-09
YCL052C	1509.63	1.17229	0.194924	8.76392e-10	3.89136e-09
YPL171C	102.293	1.99511	0.339048	8.88312e-10	3.94145e-09
YPL257W	340.526	1.40044	0.234732	9.16438e-10	4.06039e-09
YPL194W	730.414	1.28598	0.214814	9.17305e-10	4.06131e-09
YNL092W	193.804	2.11949	0.362729	9.95665e-10	4.39562e-09
YHR161C	4092.25	1.81342	0.308443	1.0197e-09	4.49206e-09
YKL211C	11496.6	1.78243	0.303039	1.03042e-09	4.53604e-09
YPL070W	1323.07	1.31753	0.221017	1.03118e-09	4.53616e-09
YOR377W	1089.24	1.24947	0.209774	1.09485e-09	4.80594e-09
YDL035C	3447.9	1.28673	0.216352	1.10694e-09	4.85556e-09
YEL067C	237.042	1.84501	0.315095	1.15869e-09	5.06816e-09
YIL097W	545.762	1.59422	0.270747	1.20245e-09	5.24465e-09
YLR023C	3434.24	1.21769	0.204586	1.23322e-09	5.37506e-09
YGR066C	64.5192	2.6706	0.462958	1.23648e-09	5.38263e-09
YCR098C	168.056	1.704	0.290438	1.2367e-09	5.38263e-09
YGR125W	4084.75	1.18712	0.199396	1.25609e-09	5.46314e-09
YIL087C	505.258	1.62377	0.276482	1.26977e-09	5.51877e-09
YDL130W-A	1209.5	2.06634	0.356836	1.37541e-09	5.96528e-09
YKL133C	497.957	1.40202	0.237922	1.43291e-09	6.21027e-09
YMR262W	1055	1.81659	0.312589	1.51863e-09	6.56794e-09
YBR018C	116.901	1.87192	0.322239	1.53259e-09	6.62368e-09
YDR284C	3282.55	1.42669	0.242924	1.57223e-09	6.7861e-09
YPL264C	2274.77	2.40131	0.420107	1.60823e-09	6.936e-09
YNL115C	2144.75	1.5697	0.268709	1.65614e-09	7.13265e-09
YOR104W	606.183	1.28919	0.218984	1.68431e-09	7.24887e-09
YCR106W	1001.12	1.40304	0.239254	1.69216e-09	7.27758e-09
YPR006C	388.316	1.35801	0.231796	1.85564e-09	7.94739e-09
YHR111W	1521.05	1.20799	0.205284	1.85789e-09	7.95153e-09
YBL103C	2605.79	1.43516	0.246461	1.91421e-09	8.18118e-09
YOR080W	1337.47	1.12568	0.19101	1.92359e-09	8.21556e-09
YBR006W	2228.93	2.13303	0.373158	2.02501e-09	8.63677e-09
YOR036W	1385.64	1.77882	0.308633	2.0959e-09	8.92062e-09
YIL061C	907.287	1.41985	0.244289	2.27452e-09	9.64089e-09
YGR121C	3206.58	1.17844	0.201286	2.29961e-09	9.74055e-09
YOR383C	757.783	1.2281	0.210252	2.31494e-09	9.79873e-09
YFR023W	45.6461	3.58965	0.636318	2.37645e-09	1.00522e-08
YOL164W	1215.36	1.26901	0.218008	2.56279e-09	1.08182e-08
YDL104C	542.132	1.3356	0.230123	2.5919e-09	1.09335e-08
YBR169C	962.925	1.50399	0.261424	2.94511e-09	1.23558e-08
YNL093W	37.5635	4.19014	0.73729	3.01739e-09	1.26419e-08
YJL132W	417.893	1.45391	0.252578	3.06546e-09	1.28345e-08
YEL068C	700.201	1.18632	0.204432	3.09855e-09	1.29643e-08
YDR178W	1817.99	1.4442	0.251152	3.17916e-09	1.32835e-08
YBR222C	1916.66	1.09156	0.187974	3.32606e-09	1.38879e-08
YLR191W	1207.88	1.22111	0.211192	3.38208e-09	1.41122e-08
YGR267C	7344.49	1.1347	0.195669	3.41243e-09	1.42292e-08
YNL055C	18290.7	1.27278	0.220814	3.44019e-09	1.43353e-08
YNL156C	3152.34	1.12978	0.194975	3.47584e-09	1.44741e-08
YHR199C	2037.96	1.0566	0.182005	3.53348e-09	1.47041e-08
YMR323W	36.6989	4.15066	0.734993	3.64892e-09	1.51539e-08
YIL017C	1160.84	1.31329	0.228432	3.70733e-09	1.53757e-08
YHL042W	110.087	1.84524	0.326687	4.02415e-09	1.66449e-08
YPR020W	1091.86	1.0853	0.188026	4.07251e-09	1.68336e-08
YOR041C	65.6047	2.3906	0.428333	4.16415e-09	1.71663e-08
YDL234C	1462.44	1.24285	0.216427	4.18012e-09	1.72206e-08
YGR088W	670.527	1.87047	0.332923	4.31813e-09	1.77654e-08
YMR316W	885.464	1.1691	0.203531	4.45881e-09	1.82954e-08
YDR322C-A	2555.36	1.1481	0.199751	4.52291e-09	1.8546e-08
YPL148C	338.709	1.3268	0.232846	4.91431e-09	2.00709e-08
YCR023C	4344.9	1.35463	0.238455	5.16251e-09	2.10427e-08
YHR018C	75388.6	2.09059	0.375864	5.18617e-09	2.11251e-08
YKR105C	37.9837	3.6146	0.65243	5.20661e-09	2.11944e-08
YLR299W	5912.48	1.97268	0.355677	5.55446e-09	2.25955e-08
YMR018W	131.426	1.75646	0.313439	5.57349e-09	2.26579e-08
YKL065C	4250.31	1.32943	0.234417	5.77321e-09	2.34081e-08
YDL243C	358.065	1.32031	0.232772	5.7786e-09	2.34145e-08
YHR100C	869.88	1.3026	0.230343	6.49776e-09	2.62767e-08
YDR525W-A	1649.9	1.30489	0.23081	6.57533e-09	2.6573e-08
YGL117W	7632.97	2.18471	0.397534	6.58733e-09	2.6604e-08
YGR203W	686.324	1.15844	0.204163	6.80894e-09	2.7481e-08
YDR014W-A	54.2189	2.55795	0.466251	6.87857e-09	2.77257e-08
YNL036W	8394.64	2.53868	0.46349	6.98602e-09	2.81404e-08
YNL063W	745.569	1.13583	0.200315	7.15506e-09	2.88025e-08
YHR063C	3819.17	1.13199	0.200301	8.03948e-09	3.22154e-08
YFL004W	6362.44	1.00446	0.177048	8.10268e-09	3.24265e-08
YJL163C	561.868	1.9035	0.345787	8.1403e-09	3.25348e-08
YDR309C	1896.86	1.02982	0.181957	8.52904e-09	3.40003e-08
YIL029C	395.422	1.27469	0.227114	8.5962e-09	3.42421e-08
YOL104C	151.381	2.90382	0.540972	8.74788e-09	3.48052e-08
YMR092C	3137.13	1.07661	0.191169	9.53493e-09	3.78145e-08
YGR256W	90.7561	2.27919	0.41924	9.61591e-09	3.80867e-08
YDR262W	2281.57	1.16086	0.206864	9.7638e-09	3.86476e-08
YPL119C-A	93.0938	2.04565	0.375155	1.01574e-08	4.01027e-08
YER040W	2317.67	1.40453	0.253351	1.01829e-08	4.01775e-08
YEL028W	230.394	1.49088	0.269338	1.05479e-08	4.15909e-08
YDR223W	163.813	1.67287	0.303981	1.071e-08	4.22032e-08
YBR287W	4226.62	1.1426	0.204316	1.08667e-08	4.27932e-08
YKL107W	45.5047	3.23231	0.60126	1.10295e-08	4.34066e-08
YAL067C	365.445	1.25885	0.225996	1.11406e-08	4.38133e-08
YBL016W	74.2372	2.77999	0.5181	1.1147e-08	4.38133e-08
YDR259C	163.504	1.57422	0.286343	1.21418e-08	4.76622e-08
YJR029W	103.74	1.80214	0.330689	1.29669e-08	5.07721e-08
YHR017W	988.95	1.10836	0.199193	1.36276e-08	5.31227e-08
YAL054C	365.358	1.27526	0.230532	1.36381e-08	5.313e-08
YOR192C	433.195	1.40413	0.25517	1.40001e-08	5.44714e-08
YCR020C-A	941.756	1.16026	0.209206	1.44738e-08	5.61021e-08
YIL156W	1385.28	1.08596	0.19562	1.52345e-08	5.89394e-08
YPR098C	1212.98	1.17897	0.213313	1.55821e-08	6.01331e-08
YBR293W	996.911	1.38725	0.252985	1.57045e-08	6.05675e-08
YKL141W	3282.8	1.18678	0.214867	1.57574e-08	6.07301e-08
YNL295W	924.259	1.09405	0.197439	1.57664e-08	6.07301e-08
YPL002C	1009.19	1.09997	0.198815	1.64145e-08	6.30945e-08
YBR272C	863.682	1.2167	0.221034	1.69651e-08	6.51032e-08
YDR377W	3012.16	1.05353	0.190603	1.8565e-08	7.09775e-08
YOR120W	945.539	1.4458	0.265949	1.93205e-08	7.37745e-08
YFR022W	661.511	1.14785	0.208909	1.93611e-08	7.3884e-08
YAL049C	1143.29	1.08032	0.196158	1.93944e-08	7.39652e-08
YML099C	2537.16	1.05646	0.192188	2.10365e-08	7.99802e-08
YGR174C	984.038	1.17312	0.214552	2.24428e-08	8.51169e-08
YDR358W	611.133	1.46108	0.271087	2.46871e-08	9.35134e-08
YCR104W	54.0008	2.94869	0.565359	2.52449e-08	9.5509e-08
YGR268C	873.799	1.17619	0.216304	2.58063e-08	9.74534e-08
YIR018W	841.256	1.05729	0.193827	2.69858e-08	1.01664e-07
YOR044W	1057.96	1.21766	0.224602	2.69874e-08	1.01664e-07
YEL029C	1544.78	1.21407	0.224255	2.82867e-08	1.06494e-07
YOL113W	1255.75	1.05261	0.193464	2.90251e-08	1.09207e-07
YHR194W	1180.84	1.15996	0.214577	3.1475e-08	1.18065e-07
YDR265W	955.284	1.09767	0.202662	3.17441e-08	1.19002e-07
YOR364W	86.8894	1.8811	0.357383	3.39832e-08	1.27009e-07
YPR160W	598.776	2.57629	0.499857	3.49676e-08	1.3053e-07
YPR201W	136.548	1.65007	0.312184	3.62319e-08	1.35086e-07
YJL141C	1295.26	1.03661	0.191858	3.64815e-08	1.35934e-07
YOR142W	7680.03	1.36783	0.257519	3.91544e-08	1.45542e-07
YHR051W	2312.14	1.04552	0.193843	3.93063e-08	1.45931e-07
YCR091W	452.222	1.26589	0.237235	4.1682e-08	1.54471e-07
YBR005W	942.266	1.06904	0.19924	4.33909e-08	1.60708e-07
YPL113C	176.78	1.74049	0.332438	4.37366e-08	1.61891e-07
YJL022W	40.3885	3.25635	0.636607	4.39535e-08	1.62596e-07
YNL041C	1981.86	1.03637	0.1932	4.53397e-08	1.67423e-07
YPL252C	2784.17	1.16181	0.217669	4.60638e-08	1.69893e-07
YER079W	846.109	1.96535	0.379214	4.61228e-08	1.70009e-07
YOR173W	435.73	2.28778	0.44594	4.68662e-08	1.72646e-07
YAL048C	1182.01	1.33946	0.252904	4.71041e-08	1.73419e-07
YPL236C	781.655	1.10117	0.206111	4.75534e-08	1.74968e-07
YGR213C	38.9664	3.07326	0.602963	4.93641e-08	1.81414e-07
YHR162W	28721.5	1.32882	0.251709	4.95661e-08	1.81939e-07
YGL026C	17722.6	1.09242	0.204824	5.04957e-08	1.85241e-07
YJL201W	1687.52	1.10454	0.207448	5.23962e-08	1.91985e-07
YBR019C	43.9754	2.61716	0.513219	5.56259e-08	2.03455e-07
YDL059C	1087.57	1.00396	0.188287	5.59423e-08	2.04491e-07
YOL083W	293.765	1.96604	0.382728	5.92076e-08	2.15915e-07
YLR211C	1133.29	1.28389	0.243959	6.0205e-08	2.19293e-07
YFL054C	481.474	1.27764	0.242787	6.07891e-08	2.21159e-07
YIL102C-A	404.207	1.35415	0.258343	6.20521e-08	2.25609e-07
YNL228W	54.0662	2.30771	0.452649	6.21855e-08	2.25839e-07
YDR058C	523.648	1.11839	0.212112	6.84859e-08	2.48282e-07
YLL047W	29.7503	4.37999	0.849318	7.20352e-08	2.60689e-07
YDR261C-D	354.106	1.39478	0.268064	7.34341e-08	2.65284e-07
YJL072C	1242.44	1.38689	0.266548	7.43842e-08	2.68559e-07
YLR290C	1377.01	1.49177	0.288209	7.62648e-08	2.75037e-07
YER152C	2556.49	1.03605	0.197032	8.14585e-08	2.9307e-07
YDL198C	26644.5	1.54146	0.299085	8.15848e-08	2.93353e-07
YNL226W	41.8225	3.17215	0.636653	8.1882e-08	2.9425e-07
YDR369C	551.639	1.10207	0.210238	8.21218e-08	2.9494e-07
YNL159C	872.914	1.05237	0.200744	8.71444e-08	3.11888e-07
YIL077C	907.025	1.15136	0.220578	8.79175e-08	3.1429e-07
YHR139C	74.5855	2.11264	0.418688	9.05008e-08	3.2315e-07
YDR371W	957.503	1.08718	0.20837	9.55713e-08	3.4086e-07
YBR278W	880.912	1.0047	0.192105	9.71154e-08	3.46167e-07
YNR070W	183.854	1.36783	0.265343	9.84326e-08	3.50456e-07
YMR062C	24914.4	1.37741	0.270272	1.04008e-07	3.69453e-07
YIR018C-A	41.3644	2.83129	0.573806	1.0439e-07	3.70597e-07
YIL152W	838.097	1.16516	0.224705	1.04907e-07	3.72216e-07
YDR419W	1125.62	1.0842	0.208585	1.06876e-07	3.78778e-07
YNR058W	1063.82	1.72906	0.341389	1.07485e-07	3.80706e-07
YLR138W	5989.7	1.406	0.274146	1.12901e-07	3.99432e-07
YKL072W	1285.92	1.11152	0.214712	1.1556e-07	4.08135e-07
YDR179W-A	974.027	1.03622	0.199707	1.17587e-07	4.15056e-07
YDR010C	33.1385	3.37508	0.682745	1.19814e-07	4.22432e-07
YPR178W	984.104	1.03883	0.200572	1.23346e-07	4.34388e-07
YIL116W	12450.8	1.2013	0.234025	1.32663e-07	4.65605e-07
YOR386W	412.895	1.68709	0.335624	1.36836e-07	4.78886e-07
YGL059W	3022.99	2.09153	0.421177	1.39252e-07	4.8679e-07
YBR139W	3809.44	1.96745	0.397462	1.40474e-07	4.90782e-07
YOL048C	1064.69	1.55109	0.307275	1.40761e-07	4.91507e-07
YPR002C-A	42.5559	2.71319	0.553333	1.42099e-07	4.95619e-07
YOR005C	610.803	1.05238	0.204172	1.44273e-07	5.02631e-07
YPR145W	61226.6	1.3258	0.263978	1.64527e-07	5.70934e-07
YDR435C	948.559	1.08292	0.211656	1.65142e-07	5.72423e-07
YCL017C	3105.78	1.01254	0.197763	1.74672e-07	6.03707e-07
YPL191C	444.671	1.38442	0.274712	1.7681e-07	6.10464e-07
YLL016W	608.01	1.29856	0.256801	1.77054e-07	6.10965e-07
YNL194C	49.5201	2.71014	0.559374	1.80327e-07	6.2191e-07
YBR043C	6942.85	1.29987	0.257295	1.82568e-07	6.28937e-07
YPR010C-A	868.682	1.11045	0.218051	1.84059e-07	6.33717e-07
YKL208W	371.409	1.14332	0.225118	1.8814e-07	6.46685e-07
YNR001C	14596.5	1.91774	0.388322	1.89837e-07	6.52156e-07
YER058W	553.81	1.52584	0.30548	1.90689e-07	6.54717e-07
YER139C	476.776	1.10625	0.217688	1.9256e-07	6.60404e-07
YDR383C	717.234	1.06695	0.209751	1.95679e-07	6.70727e-07
YGR027W-B	407.063	1.50158	0.300984	2.01408e-07	6.89983e-07
YOR292C	479.233	1.15648	0.228536	2.0493e-07	7.01656e-07
YOL163W	124.909	1.55479	0.31324	2.21042e-07	7.55565e-07
YAR009C	468.234	1.36431	0.27288	2.22747e-07	7.60549e-07
YJL100W	1027.82	1.10105	0.217864	2.24337e-07	7.65554e-07
YHR138C	664.331	1.47185	0.296062	2.27837e-07	7.76208e-07
YDL199C	469.905	1.80046	0.368533	2.51376e-07	8.53571e-07
YHR176W	763.574	1.35558	0.272487	2.54413e-07	8.62933e-07
YKR098C	600.2	1.04844	0.208032	2.5487e-07	8.64008e-07
YMR315W-A	29.4396	3.76871	0.783443	2.61723e-07	8.86265e-07
YCR024C	604.001	1.17954	0.235584	2.62807e-07	8.89444e-07
YLR005W	2020.99	1.03229	0.204937	2.6352e-07	8.91367e-07
YDR043C	288.537	1.67217	0.341222	2.65958e-07	8.99123e-07
YLR307W	46.4599	2.91981	0.615579	2.72312e-07	9.1909e-07
YCR036W	1873.04	1.12912	0.225632	2.81974e-07	9.50139e-07
YOL082W	1647.16	1.28121	0.258257	2.96582e-07	9.97725e-07
YBR056W-A	410.05	1.76388	0.363096	2.98478e-07	1.00356e-06
YDR034C	4917.92	1.03433	0.20646	3.04145e-07	1.0215e-06
YOR228C	639.564	1.15708	0.232307	3.08257e-07	1.03474e-06
YBR255W	1434.88	1.00826	0.201438	3.18862e-07	1.06918e-06
RUF20	158.15	1.41797	0.288254	3.19825e-07	1.07182e-06
YGL096W	262.935	1.36133	0.276219	3.2227e-07	1.07943e-06
YCL048W	33.0169	3.06694	0.646854	3.26782e-07	1.09395e-06
YOR289W	608.548	1.61807	0.33226	3.27031e-07	1.09419e-06
YJR151C	315.627	1.23857	0.25065	3.48853e-07	1.16593e-06
YKR033C	23.7929	7.78107	2.68539	3.6794e-07	1.22773e-06
YJR035W	1227.99	1.02973	0.207877	4.09349e-07	1.36001e-06
YOR230W	9217.61	1.07723	0.218006	4.13299e-07	1.37239e-06
YIL058W	33.0415	3.05998	0.653207	4.20079e-07	1.39265e-06
YPR005C	229.411	1.28979	0.263911	4.31166e-07	1.42558e-06
YDR314C	619.584	1.01094	0.204609	4.42508e-07	1.46151e-06
YGL258W-A	42.9816	2.47758	0.528316	4.43603e-07	1.46397e-06
YNL208W	6510.95	1.14053	0.232235	4.52862e-07	1.49171e-06
YPR158W-B	240.586	2.01084	0.425556	4.55002e-07	1.49796e-06
YBL080C	540.894	1.07074	0.217612	4.61389e-07	1.51737e-06
YOL052C-A	126.624	2.93676	0.641243	5.00068e-07	1.63584e-06
YMR063W	541.816	1.24484	0.255956	5.071e-07	1.65708e-06
YDL021W	457.949	1.61869	0.338876	5.19648e-07	1.69539e-06
YPL041C	323.557	1.11406	0.22801	5.23491e-07	1.70612e-06
YER039C-A	77.6401	2.03511	0.433049	5.3986e-07	1.75483e-06
YOL055C	640.678	1.01358	0.206857	5.44453e-07	1.76883e-06
YOR152C	304.595	1.41481	0.294645	5.73522e-07	1.85934e-06
YPL270W	2916.4	1.07761	0.22113	5.79417e-07	1.87619e-06
YGL146C	149.853	1.64947	0.347536	5.93463e-07	1.91895e-06
YML045W	67.0143	1.88316	0.401534	6.47994e-07	2.08979e-06
YJL202C	38.8567	2.477	0.536254	6.48365e-07	2.08989e-06
YHR180W	179.119	1.405	0.295003	7.08503e-07	2.27897e-06
tN(GUU)P	48.5083	2.53239	0.552791	7.10853e-07	2.28534e-06
YDR018C	77.4394	1.75124	0.373621	7.32264e-07	2.35049e-06
YAL028W	231.54	1.64105	0.349282	7.46572e-07	2.39268e-06
YKR009C	562.08	1.14123	0.237682	7.77906e-07	2.48793e-06
YJR156C	129.013	1.45131	0.307474	8.34084e-07	2.65932e-06
YOR142W-B	122.768	2.09577	0.456968	8.40661e-07	2.67752e-06
RNA170	56.2026	2.05575	0.44777	9.05007e-07	2.87355e-06
YBR240C	168.122	1.3515	0.286358	9.19845e-07	2.91916e-06
YDR476C	1066.03	1.10891	0.232261	9.20648e-07	2.9202e-06
YIL071C	689.274	1.05207	0.220183	9.56511e-07	3.0284e-06
YHR105W	273.467	1.17525	0.247776	1.00115e-06	3.15768e-06
YCL038C	824.002	1.1699	0.247206	1.06148e-06	3.34454e-06
YML076C	1873.83	1.14993	0.242888	1.0744e-06	3.38177e-06
YLR257W	6935.35	1.03199	0.216807	1.0786e-06	3.39328e-06
YBL064C	1587.32	1.40218	0.301572	1.17788e-06	3.68865e-06
snR62	104.254	1.63593	0.356925	1.31649e-06	4.09774e-06
YER135C	30.8885	3.23792	0.732041	1.38856e-06	4.31553e-06
YPL154C	14071.1	1.34124	0.289745	1.47968e-06	4.58947e-06
YOR032C	77.262	1.78674	0.395555	1.55749e-06	4.81869e-06
YGR153W	217.811	1.25685	0.272211	1.67382e-06	5.16047e-06
YBR248C	10926.1	1.02335	0.219642	1.76016e-06	5.4131e-06
YLR456W	318.657	1.08545	0.233608	1.77075e-06	5.44297e-06
YKL124W	555.113	1.15424	0.249536	1.82328e-06	5.60162e-06
YNL305C	1272.2	1.22815	0.267004	1.87609e-06	5.75527e-06
YOR389W	205.17	1.18557	0.257757	1.98703e-06	6.08954e-06
YEL024W	1424.63	1.26135	0.276038	2.06061e-06	6.30876e-06
YNL192W	3651.98	1.0248	0.221715	2.08519e-06	6.3745e-06
YBL039W-B	394.4	1.13811	0.247549	2.1141e-06	6.45649e-06
YDR529C	3245.69	1.03959	0.225137	2.13922e-06	6.52644e-06
YPL092W	8306.55	1.33688	0.294145	2.18938e-06	6.66987e-06
YGR292W	34.407	2.72	0.629187	2.20357e-06	6.70979e-06
YGR144W	81.9661	1.62352	0.362596	2.22054e-06	6.75811e-06
YOR338W	896.203	1.52796	0.343053	2.65445e-06	8.01537e-06
YKL062W	1804.66	1.12195	0.246881	2.76881e-06	8.34434e-06
YDR035W	20487.6	1.1422	0.25332	2.82251e-06	8.49371e-06
YDR204W	1110.64	1.19507	0.264459	2.87178e-06	8.63777e-06
YJL045W	56.1944	1.91234	0.438446	2.91754e-06	8.76257e-06
YMR194C-B	478.08	1.26012	0.281177	3.17777e-06	9.48865e-06
YEL049W	27.5179	3.59097	0.850451	3.18268e-06	9.49871e-06
YDR169C-A	62.8088	2.2742	0.531831	3.20106e-06	9.54145e-06
YJL048C	1023.81	1.10321	0.244185	3.20164e-06	9.54145e-06
YNL279W	72.0363	1.67514	0.381812	3.2268e-06	9.60715e-06
YCR006C	153.551	1.6554	0.377888	3.2451e-06	9.65694e-06
YGR243W	250.491	1.59855	0.363885	3.30015e-06	9.81603e-06
YGL183C	72.3461	1.80785	0.415182	3.3052e-06	9.82159e-06
YOR193W	475.904	1.05148	0.233288	3.56329e-06	1.05326e-05
YDL181W	452.89	1.61038	0.368413	3.57599e-06	1.05651e-05
YNL227C	2472.26	1.10868	0.247465	3.78256e-06	1.11487e-05
YDR475C	1334.57	1.05414	0.235236	4.01693e-06	1.18112e-05
YGL141W	1566.83	1.25209	0.282685	4.09905e-06	1.20297e-05
YNL077W	1464.84	1.07235	0.24015	4.23865e-06	1.2424e-05
YCR081W	1137.47	1.08817	0.244097	4.30182e-06	1.25948e-05
YMR284W	631.275	1.11581	0.251351	4.55746e-06	1.33054e-05
YOR285W	2555.14	1.0161	0.228136	4.78524e-06	1.39571e-05
YDL180W	1882.97	1.04438	0.235217	4.89762e-06	1.42378e-05
YGL024W	123.447	1.67385	0.390155	4.9044e-06	1.42507e-05
YOR347C	936.368	1.50867	0.348897	4.93154e-06	1.43161e-05
YDL010W	1720.34	1.09534	0.247807	5.08543e-06	1.47351e-05
YBR280C	551.978	1.42182	0.327929	5.16341e-06	1.494e-05
YNL331C	444.889	1.00453	0.226375	5.19019e-06	1.50104e-05
YER128W	432.647	1.01911	0.230294	5.39355e-06	1.55766e-05
YDR504C	266.188	1.19975	0.274476	5.68628e-06	1.63682e-05
YPR064W	26.1921	2.79677	0.681643	6.25778e-06	1.7913e-05
YOR303W	19367.1	1.19567	0.275387	6.5148e-06	1.86314e-05
YIR041W	21.649	3.51446	0.853366	6.63087e-06	1.89458e-05
YDR127W	15214.8	1.02266	0.233633	6.7387e-06	1.9245e-05
YIR017W-A	60.0727	2.24008	0.545359	6.82183e-06	1.94553e-05
YAR050W	184.632	1.18458	0.273408	6.83902e-06	1.94953e-05
YIL107C	669.89	1.22932	0.284881	7.0578e-06	2.01004e-05
YLR035C-A	113.488	1.73594	0.414787	7.16522e-06	2.03687e-05
YMR053C	243.281	1.53976	0.364051	7.3068e-06	2.0752e-05
YER078W-A	26.5356	2.96736	0.732516	7.32222e-06	2.07862e-05
YFL052W	39.1421	2.43644	0.599901	7.4192e-06	2.10518e-05
YPR036W-A	44240	1.70231	0.406864	7.53243e-06	2.13534e-05
YLR252W	46.9132	2.08688	0.508129	7.8113e-06	2.21236e-05
YJR109C	37307	1.55832	0.370373	7.88711e-06	2.23281e-05
YFL020C	35.1759	2.45775	0.606501	8.05952e-06	2.27743e-05
YMR175W	44.4181	2.15603	0.528302	8.147e-06	2.30004e-05
YPR137C-B	64.7431	2.39426	0.595856	8.30475e-06	2.34136e-05
YOL108C	986.12	1.16498	0.272355	8.98206e-06	2.52538e-05
YHR101C	646.966	1.01401	0.235468	9.33515e-06	2.6163e-05
YKL148C	1623.66	1.43889	0.345041	1.05317e-05	2.93828e-05
YLR461W	43.4382	2.08091	0.515304	1.07153e-05	2.9868e-05
YOL103W-B	202.652	1.62069	0.395351	1.14977e-05	3.19911e-05
YIL136W	1116.52	1.27322	0.303891	1.16889e-05	3.24939e-05
YHR189W	210.628	1.06614	0.251437	1.18604e-05	3.29557e-05
YEL011W	928.89	1.98463	0.497618	1.2805e-05	3.54684e-05
tH(GUG)K	13.4377	6.6869	2.62298	1.29417e-05	3.5831e-05
YBR201C-A	141.463	1.24272	0.29786	1.31629e-05	3.64106e-05
YMR304W	1776.22	1.03865	0.24734	1.46339e-05	4.02988e-05
YHL002C-A	42.4383	2.07571	0.525817	1.51623e-05	4.16424e-05
YCL074W	13.2225	6.64792	2.62649	1.52112e-05	4.1758e-05
tG(GCC)M	22.6077	4.76276	1.17988	1.5502e-05	4.25372e-05
YGR149W	1050.64	1.10441	0.265404	1.60666e-05	4.40083e-05
YGL010W	364.148	1.03431	0.248211	1.69583e-05	4.63065e-05
YER069W	23922.3	1.44657	0.358194	1.85112e-05	5.02797e-05
YLR270W	1158.85	1.2856	0.316745	1.99043e-05	5.39448e-05
YPL003W	635.355	1.12878	0.275228	2.02827e-05	5.4922e-05
YIL015W	81.369	1.7033	0.431941	2.07193e-05	5.60302e-05
YJR111C	2364.53	1.23935	0.304841	2.10463e-05	5.68648e-05
YOL058W	94848.6	1.3363	0.331135	2.13404e-05	5.76089e-05
YBR072W	191.236	1.38415	0.344783	2.16454e-05	5.84066e-05
YNL057W	52.3064	1.69549	0.429989	2.18413e-05	5.89094e-05
YNL130C-A	18.5149	3.55755	0.926567	2.24379e-05	6.03863e-05
YMR057C	20.612	3.37768	0.895083	2.32778e-05	6.25103e-05
YFL010W-A	85.5738	1.41675	0.355234	2.37199e-05	6.36421e-05
YGL063C-A	18.5018	3.9168	1.02404	2.54123e-05	6.79756e-05
YIR014W	178.935	1.10864	0.27375	2.58915e-05	6.91976e-05
YBR145W	7835.07	1.52195	0.38743	2.5903e-05	6.91982e-05
YDR009W	93.7729	1.31419	0.330142	2.75867e-05	7.34732e-05
YJR153W	11.6756	6.40294	2.61327	2.88714e-05	7.67619e-05
YLR125W	158.543	1.26533	0.318084	2.90515e-05	7.71744e-05
YOR351C	20.4717	2.91406	0.779611	2.90715e-05	7.71941e-05
YIR030W-A	19.7782	3.06877	0.823573	2.96366e-05	7.84918e-05
YDR354W	5977.81	1.17301	0.293923	2.96894e-05	7.85979e-05
YDR136C	18.6359	4.4752	1.14782	2.98183e-05	7.89051e-05
YHR124W	163.244	1.1669	0.29168	2.98374e-05	7.89217e-05
YDR255C	383.498	1.02941	0.256247	3.24307e-05	8.52326e-05
YKL026C	128.567	1.17986	0.29669	3.25861e-05	8.55315e-05
YOL114C	134.805	1.1902	0.299846	3.32346e-05	8.71594e-05
YLR428C	36.123	2.56327	0.699295	3.45374e-05	9.0269e-05
YNL128W	120.654	1.48511	0.384083	3.62714e-05	9.45602e-05
YBR299W	29.6509	2.2511	0.60972	3.91514e-05	0.000101767
YPL136W	19.0988	3.0159	0.824373	3.95511e-05	0.000102676
YER121W	102.66	1.5745	0.412418	4.00688e-05	0.000103933
YNL146C-A	37.4457	1.93752	0.518386	4.05594e-05	0.000105161
YCR102W-A	46.5919	1.79781	0.479842	4.33993e-05	0.0001121
YBR147W	4919.45	1.7422	0.464697	4.40229e-05	0.00011352
YPL152W	554.977	1.00052	0.255334	5.07811e-05	0.000129963
YPL219W	682.926	1.07914	0.278638	5.58081e-05	0.000142303
YGL184C	709.217	1.23994	0.324502	5.70906e-05	0.000145513
YLR158C	10.3536	6.14972	2.61093	5.79427e-05	0.000147623
YEL057C	27.2421	2.41658	0.679119	5.84008e-05	0.000148606
YIL113W	88.2727	1.80044	0.491827	5.86539e-05	0.000149189
YMR017W	40.5289	1.82591	0.498406	5.91164e-05	0.000150303
YNL043C	132.148	1.15038	0.299777	5.97573e-05	0.000151807
YLR349W	50.8081	1.62896	0.442475	6.57146e-05	0.000165915
YOL162W	56.5578	1.93657	0.538228	6.67275e-05	0.000168266
YDL041W	21.2272	2.7375	0.781528	6.68672e-05	0.000168549
YGL015C	30.6645	2.04166	0.57007	6.95618e-05	0.000174841
YJL160C	205.892	1.37677	0.369721	7.19271e-05	0.000180418
YIL120W	199.064	1.07459	0.281975	7.23086e-05	0.000181301
YER096W	194.947	1.39729	0.376462	7.28334e-05	0.000182542
YPR184W	872.447	1.38414	0.373013	7.45081e-05	0.000186512
YMR034C	100.69	1.34806	0.361857	7.46263e-05	0.000186732
YLL055W	645.555	1.24298	0.332277	7.83207e-05	0.000195342
YJR038C	9.69487	6.01601	2.60505	7.9066e-05	0.000196962
YKL162C	164.424	1.02668	0.270256	7.98841e-05	0.000198759
YBR180W	35.35	1.90271	0.536364	8.68115e-05	0.00021504
YER179W	60.0793	1.60865	0.446525	8.96317e-05	0.000221847
YGL074C	16.2951	3.66353	1.07008	0.000100791	0.000248072
YNL012W	105.703	1.16985	0.316781	0.000103836	0.000254958
YOL047C	43.7853	1.63957	0.461495	0.000107255	0.000262829
YDR402C	26.9849	2.0871	0.608029	0.000116393	0.000284204
YHR137W	495.718	1.11414	0.303148	0.000117766	0.000287214
YDR365W-B	96.5383	1.59955	0.453653	0.00011834	0.000288501
YHR193C-A	27.9383	2.04466	0.599648	0.000129098	0.000312502
YNL333W	51.9111	1.50463	0.425315	0.000129703	0.000313555
YMR306C-A	29.8191	1.97675	0.578519	0.000131572	0.000317868
YOL165C	19.2017	2.58277	0.77365	0.000133273	0.000321598
YOL024W	28.4093	1.98794	0.584989	0.000141363	0.000340055
YKR049C	466.93	1.03517	0.285531	0.000156004	0.00037338
YJL070C	542.212	1.02931	0.283945	0.000157636	0.000376993
YEL074W	49.7794	1.6946	0.494974	0.000158593	0.000378989
YDR403W	71.0002	1.31233	0.371434	0.000161993	0.000386512
YHL024W	181.38	1.01896	0.28382	0.000182155	0.000430619
YOR237W	75.1463	1.44269	0.416911	0.000183175	0.000432864
YNL274C	1093.89	1.4848	0.433586	0.000186909	0.000441011
YDR258C	3329.99	1.2853	0.36784	0.000191672	0.000451386
YBR214W	837.571	1.57839	0.464612	0.00019418	0.000457116
YKL178C	72.5269	1.44443	0.42092	0.000201296	0.000472785
YHR157W	67.47	1.32156	0.38434	0.000227419	0.000531508
YNL223W	616.7	1.04379	0.29683	0.000233347	0.000544124
YOR333C	15.7171	2.905	0.927034	0.000253788	0.00058978
RDN5-5	15.9244	2.92737	0.937751	0.000261496	0.00060632
YAR068W	13.3937	3.36122	1.06163	0.000269606	0.000622782
tM(CAU)P	22.2654	2.31151	0.737745	0.000278981	0.000643231
YKL187C	106.201	1.09104	0.317175	0.000295471	0.000679473
YGR053C	124.495	1.30666	0.391997	0.00033555	0.00076564
YLR258W	1641.59	1.1827	0.350852	0.00034637	0.000788868
YPR159C-A	12.6795	3.78729	1.19994	0.000347203	0.000790474
tL(CAA)G3	14.3956	4.83179	1.4334	0.000371168	0.000840995
YHR071C-A	65.7343	1.24643	0.375137	0.000377002	0.000853272
YBR053C	843.002	1.17057	0.35128	0.000393319	0.000887597
YMR194C-A	84.642	1.28365	0.389773	0.000396086	0.000893186
YER011W	37.8135	1.5719	0.49129	0.000404197	0.000909149
YJR128W	15.2952	2.82267	0.954398	0.000431528	0.000966742
YKL097C	20.4748	2.18434	0.719741	0.000433087	0.000969881
tK(CUU)M	22.8742	1.99917	0.651644	0.000435227	0.00097432
YPL114W	137.935	1.14853	0.347193	0.000441465	0.000987568
YLL037W	28.8095	1.80746	0.585651	0.000465715	0.00103805
YER142C	518.892	1.11607	0.339035	0.000484959	0.00107938
YOL037C	19.5223	2.24152	0.753477	0.000500007	0.00110847
YHL045W	16.1964	2.6687	0.914483	0.000502119	0.00111235
YER138C	23.81	1.95354	0.645562	0.000511448	0.00113139
YHL012W	16.5206	2.46697	0.855275	0.000590068	0.00129278
YGR273C	12.8521	4.6281	1.44612	0.000594994	0.00130311
YNL318C	11.7825	3.63661	1.23981	0.000648996	0.00141284
YKR106W	61.0563	1.26648	0.401978	0.000661799	0.00143666
YFL053W	39.5273	1.58993	0.522948	0.000669035	0.00145134
YOL118C	14.1751	2.69975	0.953013	0.000671727	0.00145667
YNR002C	59.5397	1.72834	0.582178	0.000699814	0.00151385
YNL200C	463.47	1.18823	0.376099	0.000702194	0.00151846
YIL072W	24.9414	1.99202	0.689965	0.000734442	0.00157878
YBR124W	12.1682	4.54073	1.45509	0.000746451	0.00160292
YOR034C-A	42.9094	1.39821	0.456092	0.000762664	0.00163489
YDR374C	22.0328	1.91166	0.661158	0.000801219	0.00171158
YNR034W-A	107.581	1.28924	0.418536	0.00080888	0.00172735
YPL251W	61.3871	1.389	0.456698	0.000818673	0.00174705
YBR178W	12.7825	2.8299	1.03281	0.00088929	0.00188729
YOR313C	449.184	1.03296	0.328845	0.000894764	0.00189826
YMR085W	175.647	1.0868	0.347998	0.000895267	0.00189867
YCR045C	26.5852	1.83547	0.640377	0.000912426	0.0019324
YKL065W-A	43.0273	1.50943	0.512106	0.000962721	0.00203193
YLL025W	81.544	1.16206	0.378049	0.000963489	0.00203286
YAL037C-A	11.0693	4.35686	1.47512	0.00112835	0.00236532
YLR235C	14.8961	2.4855	0.939959	0.00117111	0.00245078
YBR230C	1181.22	1.03792	0.339265	0.00117346	0.00245487
YMR082C	5.72752	4.72804	2.68131	0.00127267	0.00264267
YMR250W	661.005	1.22161	0.41326	0.00130722	0.00271077
YOR343C	29.3288	1.60926	0.571837	0.00133743	0.00276597
YGL262W	17.7048	2.1849	0.826224	0.001339	0.00276829
YOL131W	10.7699	2.90914	1.12142	0.00142475	0.00293683
YPL230W	110.337	1.08261	0.36288	0.00142601	0.00293831
YER068C-A	18.7304	1.99027	0.744415	0.00143176	0.00294819
YGL069C	32.9676	1.48469	0.525723	0.00148117	0.00303876
YDR524C-A	11.4826	2.63452	1.02482	0.00152678	0.0031227
YCL026C-A	121.035	1.24933	0.432309	0.00156241	0.00318845
YJR095W	12.4159	2.45857	0.956043	0.00156573	0.00319417
YMR251W	84.6265	1.43817	0.512014	0.00158714	0.00323357
YDL114W-A	15.3882	2.30506	0.907254	0.00167127	0.00339598
YLR157C-B	66.8105	1.24831	0.435235	0.00167749	0.00340751
snR55	35.0019	1.56003	0.569977	0.00172902	0.0035064
YLR162W	5.28833	4.50572	2.70554	0.00180457	0.00364606
YBR221W-A	5.28735	4.50546	2.70547	0.00180499	0.00364606
YDR379C-A	193.594	1.2002	0.420804	0.00185927	0.00374467
YDR250C	13.2819	2.51927	1.02663	0.00192926	0.00388014
YIL100W	27.9515	1.58742	0.588781	0.0019301	0.00388014
YBL065W	13.7687	2.34865	0.943364	0.00193256	0.00388212
YLR377C	37.6709	1.52879	0.570724	0.00212993	0.00425502
YJL027C	12.9272	2.25059	0.906805	0.00213603	0.00426061
YML039W	27.1346	1.53226	0.571693	0.00214684	0.0042791
YOR161W-A	12.2174	2.39369	0.97955	0.00218186	0.00434187
YKL031W	35.7155	1.60964	0.613735	0.00221699	0.00441037
YLR124W	30.4265	1.4598	0.543652	0.00229531	0.00455441
tS(AGA)D3	9.52821	4.03385	1.53346	0.00230018	0.00456113
YMR141C	20.1898	1.92281	0.768661	0.00230629	0.00456884
YOL085W-A	26.7142	1.65092	0.633918	0.00232508	0.00460311
YOL132W	22.341	1.6969	0.66234	0.00250793	0.00494288
YGR068W-A	4.84719	4.23998	2.74786	0.00266044	0.00521676
YKL147C	26.3245	1.73046	0.690306	0.00268349	0.00525528
YDR034W-B	40.2641	1.26571	0.467427	0.0026891	0.00526403
YHL006W-A	30.2057	1.48876	0.570061	0.00270064	0.00528383
YLR322W	9.64887	2.69053	1.15198	0.00288742	0.00561539
YOR302W	329.887	1.20921	0.448433	0.00292083	0.00567499
YPR078C	8.93422	3.06293	1.30525	0.00294328	0.00571321
YDR042C	45.6619	1.31724	0.498279	0.00302833	0.00586352
YKL053W	39.8191	1.27832	0.48325	0.00315916	0.00608435
YKL036C	80.1025	1.06817	0.391857	0.00322005	0.00619581
YFL062W	28.1336	1.44194	0.561873	0.00326422	0.00627493
YPR200C	81.1052	1.01107	0.371796	0.00349129	0.00669264
YFR017C	135.434	1.24214	0.475366	0.00356282	0.00682126
YMR105C	928.463	1.10855	0.415845	0.00358332	0.00685413
YDR327W	32.6761	1.33447	0.519087	0.00365863	0.00698518
YMR007W	13.4597	2.04344	0.892538	0.00378043	0.00719987
YOR177C	81.4188	1.03685	0.387439	0.00384606	0.00730681
YFL019C	15.7314	1.94856	0.84671	0.00395877	0.00750705
YDR316W-B	33.6296	1.43023	0.573719	0.00400474	0.00758721
YOL085C	9.2274	2.57163	1.17019	0.0040221	0.00761777
YOR186W	30.1807	1.5947	0.660984	0.00403804	0.00764325
YLR123C	15.837	1.81296	0.774539	0.00404019	0.00764497
YOL106W	34.7549	1.4312	0.576079	0.00409164	0.00773284
YPL278C	53.5384	1.10094	0.420063	0.00419959	0.00791648
YKL221W	19.9918	1.76914	0.763091	0.00426364	0.00803327
YPR197C	14.1148	1.94184	0.867998	0.00466361	0.00871229
YGR107W	32.703	1.28139	0.511888	0.00470906	0.00878919
YCR010C	24.129	1.51915	0.639778	0.0049011	0.00912002
YNL196C	11.0748	2.19025	1.01877	0.0049268	0.00916506
tG(CCC)O	15.357	1.76765	0.775691	0.0049582	0.00921513
YOL160W	19.2418	1.89151	0.869865	0.0051488	0.00952342
YML058W-A	87.1108	1.07559	0.421432	0.005197	0.00960104
YLR296W	8.76903	2.46176	1.19515	0.00565084	0.0103464
YJL028W	8.07552	2.76335	1.38304	0.00607916	0.0110813
YAL063C-A	16.2008	2.01794	0.991703	0.00617063	0.0112381
YML066C	10.366	2.30278	1.16222	0.00638329	0.0115945
YGR236C	17.885	1.78976	0.841558	0.00647129	0.0117371
YKL070W	12.5298	2.04977	1.01326	0.0065711	0.0119076
YKL071W	31.8043	1.30684	0.55768	0.00684476	0.0123744
YGL138C	8.32691	2.35864	1.19848	0.00718501	0.0129326
YML057C-A	21.3588	1.4174	0.623899	0.00728793	0.0130987
YIL046W-A	21.8565	1.43498	0.638231	0.00746321	0.0133981
YML084W	13.9629	1.73601	0.826916	0.00771493	0.0138218
YAR047C	28.3313	1.24344	0.53563	0.00793076	0.0141714
YDR048C	11.4928	2.13604	1.13623	0.00827096	0.0147127
tA(UGC)A	9.05977	2.11622	1.08946	0.00827189	0.0147127
YLR299C-A	15.2495	1.82411	0.917269	0.0085849	0.0152299
YFL058W	9.99353	1.98258	1.01597	0.00873124	0.0154628
YKL037W	22.9667	1.57365	0.750476	0.00882068	0.0156123
YOR325W	16.3791	1.56856	0.742416	0.00884879	0.0156485
YFR012W-A	12.1382	1.81853	0.91448	0.00892514	0.0157621
YLR031W	15.1212	1.69043	0.827167	0.00895195	0.0157947
YOR392W	6.67899	3.17095	1.69021	0.00958946	0.016852
YGL235W	14.7563	1.63151	0.808136	0.0100079	0.0175274
YCL001W-B	13.7371	1.7888	0.930531	0.0101354	0.0177103
YDR106W	42.522	1.01881	0.436977	0.0102267	0.017849
YPL248C	79.7012	1.04542	0.452087	0.0102565	0.0178763
YHL043W	12.3906	1.68982	0.851212	0.0103953	0.0180977
tL(UAG)L1	13.6982	1.78809	0.943081	0.0107209	0.0186357
YPR092W	11.4381	1.74116	0.898609	0.0109387	0.0189796
YBR117C	33.3359	1.13703	0.507675	0.011111	0.0192351
YJL219W	23.5933	1.30771	0.609651	0.0111518	0.0193003
YGL052W	6.22209	3.05762	1.69362	0.0113249	0.0195615
YGL081W	29.1137	1.16233	0.526871	0.0116777	0.0201201
YFR054C	36.1392	1.2175	0.563346	0.0120313	0.0207005
YDL242W	6.00103	2.97919	1.69887	0.0124943	0.0214133
YAL016C-A	9.54026	2.02205	1.21168	0.0130557	0.0223321
YGL007C-A	40.3388	1.06047	0.479839	0.0131062	0.0223997
YEL009C-A	16.387	1.52143	0.786501	0.013463	0.0229714
YPL261C	9.55434	1.84236	1.05473	0.0141597	0.0240933
YOL134C	15.7597	1.46483	0.75486	0.0143417	0.0243963
YMR084W	63.3295	1.01878	0.464522	0.0143838	0.0244613
YBL100W-C	9.35247	1.81166	1.03469	0.0145585	0.0247242
YMR153C-A	29.1479	1.10824	0.518203	0.0147375	0.0250074
YGR018C	28.4534	1.1167	0.526444	0.0151571	0.0256841
tW(CCA)P	16.8488	1.52669	0.823062	0.0154046	0.0260201
YHL019W-A	29.1651	1.10331	0.522074	0.0157116	0.0264927
YIL156W-A	16.9281	1.3764	0.704795	0.0157841	0.0265713
YHL046C	7.6465	2.05598	1.31045	0.0162627	0.0273172
YLR334C	9.09765	1.90023	1.22508	0.0173564	0.0289805
YMR254C	8.15732	1.85347	1.13791	0.017516	0.0292234
YOR105W	21.9222	1.3846	0.737762	0.0178393	0.0297226
RUF23	30.6156	1.074	0.518242	0.0179115	0.0298267
YAL047W-A	14.4516	1.54569	0.873992	0.0179376	0.0298622
YLL005C	11.75	1.54687	0.872822	0.0182172	0.0302587
YCL001W-A	8.38132	1.85909	1.17321	0.0182385	0.0302809
YMR321C	17.4768	1.30798	0.685364	0.0188055	0.0311219
YGR059W	11.4896	1.5293	0.866877	0.0191159	0.0316101
YGR248W	173.004	1.811	1.4431	0.020433	0.0335363
RME2	36.0943	1.02056	0.501807	0.0209139	0.0342253
tE(UUC)L	6.78389	1.86013	1.25194	0.0221811	0.0360692
tG(GCC)D2	21.7154	1.25734	0.694268	0.0240091	0.0387047
YGR022C	53.0221	1.01307	1.78993	0.0244661	0.0393899
YNL034W	17.0381	1.25062	0.691441	0.0247485	0.0398237
YML007C-A	18.8945	1.28489	0.724128	0.0248276	0.0399198
YGL182C	8.35724	1.75703	1.24519	0.0248344	0.0399202
YMR101C	20.8433	1.156	0.623861	0.0258223	0.0413466
YDL227C	19.1828	1.23033	0.688648	0.0262679	0.0419727
YOR024W	8.71042	1.5873	1.07138	0.0276138	0.0439352
YLR338W	14.6255	1.36496	0.844531	0.0291654	0.0461243
YGL170C	18.4385	1.1874	0.675464	0.0297542	0.046923
YOR055W	5.61185	1.86035	1.49948	0.0302261	0.047582
YCL054W-A	10.1127	1.43285	0.939008	0.0316898	0.0496452

## Sheet: edger_common_up_1155
targetID	log2FoldChange	P.Value	FDR	logCPM
YNL117W	8.5906	3.54555e-08	0.000136347	8.72137
YIR030C	5.16948	6.89736e-08	0.000136347	6.41931
YAL062W	6.96646	1.06027e-07	0.000136347	8.95101
YCL048W-A	8.24153	1.36814e-07	0.000136347	5.30579
YIR029W	5.73024	1.38255e-07	0.000136347	8.49529
YLR142W	4.93053	1.52541e-07	0.000136347	7.10767
YIR027C	6.31774	2.91898e-07	0.000136347	6.09343
YPL054W	5.67635	2.92511e-07	0.000136347	4.92184
YMR170C	4.45253	3.1651e-07	0.000136347	7.72245
YDL210W	5.42355	3.62785e-07	0.000136347	6.38186
YBL049W	5.49028	3.73241e-07	0.000136347	5.25806
YLR155C	6.44372	3.73435e-07	0.000136347	3.72999
YGR087C	4.86561	4.23861e-07	0.000136347	5.77359
YGR043C	3.67593	5.93673e-07	0.000136347	4.87957
YOR003W	4.26871	6.60734e-07	0.000136347	7.72156
YIR028W	9.3682	6.61403e-07	0.000136347	8.32491
YPL107W	4.17851	7.11889e-07	0.000136347	8.45418
YML042W	3.25073	8.58455e-07	0.000136347	5.59469
YDL069C	3.23679	1.24589e-06	0.000136347	6.52939
YLR205C	3.94077	1.29841e-06	0.000136347	5.64221
YBR203W	3.93842	1.39217e-06	0.000136347	6.45899
YLR053C	8.1664	1.44952e-06	0.000136347	7.72379
YLR307C-A	6.1432	1.54603e-06	0.000136347	3.59994
YIR042C	3.43469	1.57899e-06	0.000136347	6.80678
YIL146C	2.84007	1.61044e-06	0.000136347	7.01051
YCR099C	2.60278	1.65314e-06	0.000136347	5.43787
YMR088C	5.01926	1.8377e-06	0.000136347	11.0712
YIL037C	3.91798	1.84134e-06	0.000136347	4.14371
YPR061C	2.41275	1.86065e-06	0.000136347	5.78244
YBR012C	3.89394	1.86754e-06	0.000136347	6.16585
YDR119W-A	5.35706	2.07407e-06	0.000136347	6.30342
YPR001W	5.50073	2.2545e-06	0.000136347	6.95168
YJR008W	2.78041	2.37441e-06	0.000136347	6.11423
YDR090C	3.76745	2.40832e-06	0.000136347	9.02338
YPL269W	3.52278	2.48369e-06	0.000136347	8.32324
YDR242W	6.19796	2.51633e-06	0.000136347	10.3603
YIR007W	2.55099	2.63954e-06	0.000136347	6.00803
YDL057W	2.7828	2.72027e-06	0.000136347	5.82347
YJL213W	3.77554	2.74298e-06	0.000136347	8.79064
YIR031C	5.41226	2.78804e-06	0.000136347	10.0213
YJR149W	2.35016	2.90912e-06	0.000136347	5.98569
YJR152W	8.31381	2.96745e-06	0.000136347	12.4566
YPL134C	2.5369	2.97211e-06	0.000136347	6.63086
YBR285W	4.91276	2.97636e-06	0.000136347	4.70003
YPL088W	2.24123	3.0192e-06	0.000136347	6.15509
YCL027W	3.49386	3.09745e-06	0.000136347	3.70826
YDR170W-A	4.04544	3.17631e-06	0.000136347	6.15306
YHR006W	3.2939	3.29204e-06	0.000136347	9.16982
YOL159C	2.40463	3.44643e-06	0.000136347	6.06762
YPL213W	2.55946	3.44662e-06	0.000136347	6.35254
YIL089W	3.03754	3.47568e-06	0.000136347	4.55472
YPL229W	2.34149	3.48387e-06	0.000136347	6.16494
YOL110W	2.11319	3.53481e-06	0.000136347	5.97893
YMR271C	3.47415	3.68709e-06	0.000139408	6.58959
YJL206C	2.24534	3.97075e-06	0.000144803	5.98741
YGL121C	3.34788	4.1599e-06	0.000147521	4.3995
YPL272C	3.17703	4.19993e-06	0.00014791	6.21152
YKR034W	7.39141	4.31317e-06	0.000150181	8.25756
YNL168C	2.24853	4.45377e-06	0.000152575	7.53813
YJR025C	2.79262	4.67243e-06	0.000155826	8.71479
YLL058W	2.53181	4.70516e-06	0.000155826	5.60746
YOR328W	2.93709	4.72814e-06	0.000155826	7.48985
YER060W	3.19436	4.7946e-06	0.000156513	4.67431
YDR085C	2.67433	4.79976e-06	0.000156513	5.22742
YDL149W	1.97232	5.09562e-06	0.000161342	6.04453
YCR100C	2.7062	5.69597e-06	0.00017208	5.70274
YPL017C	3.62465	5.76768e-06	0.000172555	4.42641
YJR011C	2.49236	6.0278e-06	0.000176063	5.97743
YHR209W	2.72834	6.1163e-06	0.000176787	5.11
YMR156C	2.68748	6.14591e-06	0.000176787	5.47028
YNL284C-B	3.00819	6.16733e-06	0.000176787	7.7459
YIL117C	3.5284	6.65357e-06	0.000183475	7.30817
YEL059C-A	2.77505	6.83408e-06	0.000184069	4.32723
YJR148W	3.32626	6.89232e-06	0.000184069	11.0236
YKR097W	3.2713	6.93653e-06	0.000184069	4.61169
YGR230W	2.38821	6.95897e-06	0.000184069	5.03271
YMR322C	4.77063	7.1492e-06	0.000186697	2.30421
YBL095W	1.97567	7.25693e-06	0.000188711	6.46596
YEL072W	1.98467	7.45917e-06	0.00019075	7.03817
YAR035W	4.11627	7.59887e-06	0.000192671	6.55717
YBR295W	1.98693	7.79614e-06	0.000193534	6.29341
YLR037C	2.61509	7.99061e-06	0.000195641	4.00633
YNL314W	2.09218	8.06831e-06	0.000195681	6.14246
YKL161C	2.14916	8.0813e-06	0.000195681	6.27674
YHR028W-A	4.38985	8.66201e-06	0.000202497	2.45244
YBR228W	1.81839	8.67421e-06	0.000202497	6.39483
YGL159W	1.99333	8.80912e-06	0.000204419	6.39556
YMR155W	2.03838	8.89491e-06	0.000204419	6.93201
YIL009C-A	1.86174	8.9224e-06	0.000204419	5.92338
YFR029W	1.92913	8.9679e-06	0.000204701	6.56285
YKR091W	4.09837	9.12961e-06	0.000206402	7.06723
YDR022C	2.1685	9.19994e-06	0.000206402	5.21325
YPR194C	3.1746	9.26258e-06	0.000206402	10.1145
YGL196W	3.75896	9.41486e-06	0.000207259	8.46959
YIR039C	3.47059	9.4163e-06	0.000207259	5.47366
YNL278W	1.7777	9.68648e-06	0.000208733	6.39331
YHR096C	3.11995	9.94862e-06	0.000212613	4.00437
YLR089C	2.79997	9.98127e-06	0.000212613	10.2194
YMR041C	1.98644	1.00045e-05	0.000212613	5.66822
YMR174C	2.76787	1.01945e-05	0.000215561	5.19488
YDR421W	2.11749	1.02803e-05	0.000215561	6.53816
YNL040W	2.29542	1.03121e-05	0.000215561	7.47179
YMR020W	2.22517	1.03135e-05	0.000215561	6.42511
YEL059W	5.01221	1.03902e-05	0.000215606	2.19286
YNL239W	3.45283	1.06092e-05	0.000217224	10.6249
YKL089W	2.53742	1.09536e-05	0.000221566	7.05669
YKR093W	5.35959	1.09569e-05	0.000221566	9.15126
YCR020C	2.60085	1.09651e-05	0.000221566	4.89165
YPR099C	3.66591	1.11629e-05	0.000223556	3.47273
YJL172W	4.76588	1.1174e-05	0.000223556	11.6553
YOR111W	1.95366	1.12948e-05	0.000223826	6.20884
YOR348C	5.14449	1.16703e-05	0.000227391	6.895
YLR246W	1.72494	1.16961e-05	0.000227391	6.67745
YLR097C	1.91375	1.18028e-05	0.000228744	6.78171
YIR005W	2.04669	1.24433e-05	0.000237049	5.84774
YLR164W	3.60301	1.24621e-05	0.000237049	6.32231
YML054C	1.95262	1.26795e-05	0.000238242	5.08951
YOR329W-A	4.29683	1.27237e-05	0.000238347	2.36564
YJL217W	2.48561	1.30289e-05	0.00024126	7.59872
YOR391C	5.18795	1.3041e-05	0.00024126	2.35282
YEL066W	2.43808	1.30965e-05	0.00024126	7.00302
YLR126C	2.02978	1.32086e-05	0.000242276	6.61306
YOL025W	1.91433	1.33201e-05	0.000243595	5.92103
YHR067W	1.71339	1.34488e-05	0.000244561	5.97134
YHR030C	1.97444	1.35008e-05	0.000244722	7.86675
YJL173C	1.79494	1.35727e-05	0.000245303	7.0585
YDR076W	2.47042	1.36512e-05	0.000246001	6.1573
YGL205W	3.5302	1.37614e-05	0.000247264	4.66417
YDR540C	3.73233	1.41122e-05	0.000251189	5.57175
YAL037W	2.66784	1.41291e-05	0.000251189	4.51648
YFR055W	2.55548	1.42244e-05	0.000251189	9.36423
YKL209C	2.19806	1.44508e-05	0.000254458	6.07333
YOR298W	3.99403	1.45486e-05	0.000255449	6.0169
YHR029C	3.02351	1.50392e-05	0.00026052	10.2451
YGR154C	3.68448	1.50776e-05	0.00026052	7.43463
YGR044C	2.29365	1.55225e-05	0.000264241	5.82809
YOL044W	1.7633	1.56067e-05	0.000264241	5.79177
YEL041W	2.29876	1.56877e-05	0.000264886	5.29934
YFR044C	2.14678	1.58602e-05	0.000265452	9.19562
YIR032C	4.31662	1.58681e-05	0.000265452	7.7847
YDR371C-A	7.35814	1.5963e-05	0.000265452	2.78052
YOL138C	1.96903	1.61182e-05	0.000266561	7.10417
YEL062W	1.69843	1.62861e-05	0.000266561	5.98842
YOR040W	1.94236	1.63128e-05	0.000266561	5.07328
HRA1	4.57525	1.64432e-05	0.000266561	4.03014
YOR100C	5.85017	1.66866e-05	0.000269214	8.36265
YGR067C	2.61027	1.69228e-05	0.000271151	4.10227
YFR046C	1.66731	1.69387e-05	0.000271151	5.92795
YIL059C	1.69168	1.70633e-05	0.000272438	5.55991
YMR107W	6.67672	1.7264e-05	0.000274222	6.6921
YER065C	2.57822	1.76089e-05	0.000277555	6.29685
YPR151C	2.74966	1.79001e-05	0.000279169	3.18972
YCL034W	2.15507	1.81232e-05	0.000279373	7.86318
YLR160C	5.84048	1.84629e-05	0.000282135	4.48872
YDL238C	4.69223	1.85533e-05	0.000282135	7.67381
YNR074C	1.66429	1.85862e-05	0.000282135	6.96929
YKL151C	2.32495	1.87539e-05	0.0002837	6.46979
YNL293W	2.23855	1.91762e-05	0.000285405	6.72812
YJR138W	1.9132	1.92184e-05	0.000285405	7.19263
YMR046W-A	3.30641	1.96596e-05	0.000287437	3.99785
YPR193C	2.67827	1.96853e-05	0.000287437	3.21465
YGR038C-B	1.92601	1.97439e-05	0.000287437	7.25974
YMR280C	2.55467	1.9763e-05	0.000287437	3.53748
YNL116W	1.82617	1.98605e-05	0.000287437	7.07296
YLR227W-B	2.39314	1.98741e-05	0.000287437	5.66706
YKL188C	3.06259	2.00082e-05	0.000287437	6.44533
YGL185C	2.05634	2.0238e-05	0.000289389	4.73583
YER188W	2.23833	2.05984e-05	0.000292543	4.55498
YLR311C	5.65928	2.06959e-05	0.000292543	2.35195
YNL125C	2.16954	2.08603e-05	0.000293102	7.1086
YJL089W	3.89458	2.08781e-05	0.000293102	5.15404
YIR017C	2.49441	2.09788e-05	0.000293847	7.43039
YHR047C	2.03813	2.12072e-05	0.000296372	7.828
YEL058W	1.82902	2.15539e-05	0.000299507	8.39872
YGR028W	1.67496	2.15773e-05	0.000299507	6.5209
YDR461W	3.57939	2.16472e-05	0.000299802	3.73899
YLL057C	2.01921	2.26781e-05	0.000307427	4.15137
YMR255W	1.59724	2.26932e-05	0.000307427	7.15152
YDL239C	4.05746	2.2944e-05	0.000309418	7.48933
RME3	2.50343	2.31729e-05	0.000311143	4.05405
YKR096W	1.7268	2.35478e-05	0.000314805	7.49248
YNL046W	1.48102	2.35478e-05	0.000314805	6.56216
YPL214C	1.6654	2.36376e-05	0.000315322	6.60012
YOR019W	1.58364	2.37763e-05	0.000315864	5.35648
YLR312C	5.51546	2.39837e-05	0.000317874	5.76587
YML098W	1.64313	2.46726e-05	0.000322155	7.11714
YMR226C	2.27777	2.48242e-05	0.00032345	9.50345
YBR033W	2.48143	2.49994e-05	0.00032368	3.27918
YDR287W	1.64023	2.51505e-05	0.000324273	6.39423
YBR235W	1.99129	2.54594e-05	0.000326888	8.1879
YFR008W	1.83837	2.58282e-05	0.00032875	4.95829
YOR366W	2.58519	2.58711e-05	0.00032875	3.68226
YPL223C	3.0785	2.60368e-05	0.000329877	3.1614
YCR073C	2.54918	2.64166e-05	0.000333023	7.00124
YPL119C	1.86131	2.64235e-05	0.000333023	4.4112
YPL150W	1.5644	2.69383e-05	0.00033693	7.14266
YER160C	1.68051	2.74064e-05	0.000340536	4.77905
YEL064C	1.80115	2.79568e-05	0.000345286	6.05412
YLR351C	1.93115	2.85532e-05	0.000349153	8.49153
YDR041W	1.53424	2.93138e-05	0.000354933	6.9247
YNL054W-B	2.75643	3.02091e-05	0.000362922	8.50203
YIL083C	1.94666	3.05312e-05	0.000364658	7.19215
YOR035C	1.66536	3.15656e-05	0.000368407	6.49413
YKR015C	3.52609	3.16168e-05	0.000368407	2.18682
YDR126W	2.46425	3.16517e-05	0.000368407	5.94683
YJR036C	2.31347	3.19852e-05	0.000371005	5.08651
YHR022C	2.46309	3.21461e-05	0.000371005	3.17113
YPR058W	1.84968	3.22686e-05	0.000371322	8.43377
YOR020W-A	1.98669	3.23299e-05	0.000371322	5.9947
YGL249W	2.77215	3.28554e-05	0.000374892	3.41808
YLR004C	3.62404	3.31941e-05	0.000375368	4.56975
YDR533C	1.98899	3.3489e-05	0.000377317	7.2339
YBL005W-B	1.95096	3.35634e-05	0.000377466	6.42316
YKR101W	1.47043	3.36371e-05	0.000377606	5.59338
YER174C	1.67725	3.40625e-05	0.000381686	6.89675
YPL047W	1.59082	3.4293e-05	0.000382877	6.17984
YOL107W	1.75021	3.46122e-05	0.000383787	5.74495
YJR096W	2.12066	3.48329e-05	0.000383787	5.88797
YLR193C	1.514	3.48728e-05	0.000383787	6.44668
YBL048W	4.50575	3.60902e-05	0.000392215	1.72853
YER184C	2.04116	3.61477e-05	0.000392215	5.55289
YKL162C-A	3.04198	3.65043e-05	0.000395388	2.5196
YLR149C	3.25233	3.681e-05	0.000396703	5.23786
YCR068W	1.89417	3.70148e-05	0.00039807	6.58291
YGL005C	1.51809	3.75874e-05	0.000402172	7.25597
YDL032W	4.55057	3.80306e-05	0.000404508	1.56419
YMR104C	1.85265	3.81995e-05	0.000404508	6.31822
YJR004C	1.52537	3.83444e-05	0.000405346	6.26161
YJR078W	2.76053	3.86181e-05	0.000407171	3.75074
YNL145W	2.6526	3.86492e-05	0.000407171	3.25441
YHR106W	1.35848	3.8869e-05	0.000408128	6.10737
YLR001C	1.77661	3.90521e-05	0.0004089	6.83403
YMR195W	3.37944	3.92114e-05	0.0004089	8.61501
YDR530C	2.13345	3.95195e-05	0.000410031	6.81588
YOR337W	1.96567	3.96238e-05	0.000410423	8.28688
YMR252C	1.39784	4.03036e-05	0.000415369	5.39645
YLL063C	1.6261	4.04835e-05	0.000415857	4.86709
YHR075C	1.55081	4.09043e-05	0.000417038	4.58658
YAL063C	1.69123	4.10068e-05	0.000417038	4.65645
YDR453C	3.9498	4.11288e-05	0.000417414	6.23698
YGR161W-C	2.042	4.11793e-05	0.000417414	5.0187
YLL056C	2.38585	4.13234e-05	0.000417603	3.79993
YDR461C-A	1.80888	4.13581e-05	0.000417603	5.13218
YGR182C	1.47622	4.1909e-05	0.000419976	5.30049
YNL335W	3.23472	4.20444e-05	0.000420648	2.68619
YLL060C	1.6926	4.22242e-05	0.000420903	4.87621
YMR077C	1.43862	4.2457e-05	0.000421357	5.71006
YPL188W	1.89202	4.25642e-05	0.000421741	7.50807
YDL067C	2.45886	4.26828e-05	0.000421805	9.34416
YOL091W	2.30315	4.31685e-05	0.000425676	5.27032
YPR046W	1.71361	4.3507e-05	0.000425682	5.16949
YGR023W	1.85385	4.35145e-05	0.000425682	6.02011
YKL103C	4.30286	4.39683e-05	0.000428084	9.46981
YOL112W	1.42674	4.42091e-05	0.000429524	7.33281
YDR131C	1.42211	4.42557e-05	0.000429524	5.3933
YJR119C	1.89369	4.45487e-05	0.00043101	5.17335
YKL168C	1.38437	4.50833e-05	0.000434817	6.15012
YDR391C	1.73562	4.55379e-05	0.000437832	6.17884
YKL220C	1.58177	4.56929e-05	0.000438638	4.69756
YDR080W	2.52201	4.63027e-05	0.000442309	7.94605
YBR105C	1.5923	4.64376e-05	0.000442309	8.12548
YHL016C	4.14843	4.64444e-05	0.000442309	8.72333
YDL085W	4.83583	4.65059e-05	0.000442309	5.76544
YDR272W	1.4186	4.67796e-05	0.000444226	7.06745
YJL077C	2.42887	4.69956e-05	0.000445591	3.23349
YJL155C	1.82148	4.71499e-05	0.000446367	6.06671
YNL004W	1.76082	4.74775e-05	0.000448092	9.17573
YDR210C-D	2.66393	4.76845e-05	0.000448671	5.16314
YCR018C	3.17463	4.78715e-05	0.000449744	4.54073
YMR103C	1.79904	4.82009e-05	0.000450094	4.54563
YER045C	1.48559	4.94641e-05	0.000455676	5.4322
YER010C	1.63795	4.97857e-05	0.000456382	6.61361
YOR011W	1.44711	5.02938e-05	0.000459882	6.75793
YOR208W	1.52939	5.13669e-05	0.000466923	6.23789
YLR094C	1.57063	5.16885e-05	0.000468347	6.61747
YDR001C	1.82027	5.1762e-05	0.000468347	8.24556
YIL046W	1.45241	5.27683e-05	0.000475455	7.28299
YPR007C	3.15579	5.34846e-05	0.000479107	1.79297
YJL056C	1.55161	5.35713e-05	0.000479188	6.68952
YBR227C	1.57875	5.36713e-05	0.000479385	7.22824
YNR065C	2.39814	5.45841e-05	0.000485428	7.9194
YMR181C	1.8973	5.55641e-05	0.000489902	6.43829
YNR064C	3.23025	5.56896e-05	0.000490307	2.40643
YKR004C	1.61452	5.64089e-05	0.000495896	5.68112
YMR178W	1.4503	5.66915e-05	0.000495896	7.18513
tD(GUC)N	2.71421	5.67463e-05	0.000495896	3.36779
YIL092W	2.16661	5.70113e-05	0.000496272	6.99331
YJL147C	1.30757	5.74594e-05	0.000499369	5.37845
YOL117W	1.91881	5.7766e-05	0.000499865	5.65111
YGR080W	1.7673	5.79918e-05	0.000499865	7.00808
YHL023C	1.38844	5.82442e-05	0.000500469	7.43124
YIL111W	2.34118	5.83265e-05	0.000500469	7.5847
YFL042C	1.61658	5.87235e-05	0.000501316	6.5572
YGL248W	2.50268	5.87296e-05	0.000501316	7.0714
YNR068C	3.79489	5.8889e-05	0.000501982	8.15305
YOL128C	2.48095	5.92125e-05	0.000502979	5.96497
YNL009W	1.44275	5.93497e-05	0.000502979	4.73571
YDL200C	1.69003	5.93627e-05	0.000502979	5.52757
YDL054C	2.72414	5.98097e-05	0.00050408	8.60609
YCR101C	2.55667	6.01166e-05	0.00050408	4.96675
YEL012W	2.04761	6.06993e-05	0.000507584	6.01311
YGL104C	2.89145	6.08153e-05	0.000507866	5.84198
YJL161W	3.15484	6.13075e-05	0.000509083	4.37534
YDL024C	2.52365	6.1352e-05	0.000509083	2.9324
YOR134W	3.8642	6.13983e-05	0.000509083	2.80605
YPR057W	1.33201	6.15012e-05	0.000509083	6.91613
YJL199C	2.1688	6.15394e-05	0.000509083	4.98382
YBR007C	1.3404	6.16549e-05	0.000509254	6.66219
YLR189C	1.79716	6.17252e-05	0.000509254	7.58882
YBL089W	1.4681	6.18157e-05	0.000509319	6.59912
YPR066W	1.76443	6.2027e-05	0.000510377	4.39579
YPL071C	1.23473	6.32355e-05	0.000516871	5.95266
YCR007C	2.00718	6.34601e-05	0.00051802	4.07856
YDL142C	1.83404	6.35633e-05	0.000518175	6.03541
YGR190C	3.7178	6.3664e-05	0.000518311	2.20407
YBR157C	2.02205	6.40052e-05	0.000520401	3.3637
YAL061W	2.73032	6.43466e-05	0.000522043	5.27287
YMR323W	4.36235	6.47226e-05	0.000522759	1.39541
YBR081C	1.38913	6.49107e-05	0.000522759	7.47321
YER119C-A	3.42824	6.49738e-05	0.000522759	2.16841
YOL133W	1.30382	6.52507e-05	0.000523405	6.4103
YKL155C	1.65558	6.53746e-05	0.000523405	7.05597
YMR026C	1.6145	6.59675e-05	0.000526063	6.85313
YPL185W	3.19491	6.59819e-05	0.000526063	2.2165
YPL052W	1.50469	6.64115e-05	0.000526234	6.54402
YIL073C	1.97382	6.64685e-05	0.000526234	3.34006
YKL197C	1.3741	6.64696e-05	0.000526234	6.62511
YLR054C	2.65139	6.6505e-05	0.000526234	3.12819
YGR288W	1.95228	6.65157e-05	0.000526234	5.31502
YLR362W	1.20847	6.665e-05	0.000526621	6.29352
YDR425W	1.65826	6.6889e-05	0.000527226	6.40533
YHR202W	2.25015	6.68977e-05	0.000527226	6.4179
YKL217W	2.03789	6.71055e-05	0.00052771	3.42811
YKR005C	1.75713	6.75682e-05	0.000528455	4.29414
YKL084W	2.00952	6.77544e-05	0.00052924	6.11249
YGL156W	3.5101	6.86166e-05	0.000531262	6.20658
YDL215C	1.93391	6.88087e-05	0.000531489	7.89051
YGL154C	1.94185	7.06211e-05	0.000542355	5.98701
YDL170W	3.01539	7.06654e-05	0.000542355	9.32976
YBR241C	1.88998	7.08302e-05	0.000542729	6.54567
YNL015W	2.56353	7.09085e-05	0.000542729	6.96468
YHR122W	2.24526	7.12375e-05	0.000544036	8.153
YGR183C	1.68916	7.25161e-05	0.000549317	6.86073
YHR044C	1.43161	7.31447e-05	0.000553117	4.86741
YDR315C	2.33249	7.33263e-05	0.000553811	5.5358
YLR251W	2.8576	7.40304e-05	0.000557081	4.54437
YAL015C	1.28065	7.5049e-05	0.00056154	6.04244
YGL045W	1.33797	7.5765e-05	0.000564619	5.47332
YHR015W	2.41672	7.63627e-05	0.0005677	3.59536
YKL096C-B	2.63372	7.65252e-05	0.000568223	2.33024
YLL047W	4.63296	7.70596e-05	0.000570611	1.11705
YDL169C	4.25465	7.71246e-05	0.000570611	6.22884
YJR019C	1.69107	7.74262e-05	0.000572156	5.66485
YPL031C	1.65586	7.76229e-05	0.000572922	7.69576
YPR170C	2.41382	7.80802e-05	0.000575608	2.59552
YIL026C	1.36826	7.85483e-05	0.000575747	7.11937
YNL014W	1.43643	7.8585e-05	0.000575747	5.04806
YDR317W	3.25934	7.86596e-05	0.000575747	3.17749
YNL294C	1.48609	8.00414e-05	0.000584473	7.62076
YPL257W	1.4747	8.07413e-05	0.000586112	4.47492
YER175W-A	3.29551	8.12855e-05	0.000587984	2.96883
YOR221C	2.04769	8.1816e-05	0.000590436	7.67957
YMR106C	1.6776	8.23025e-05	0.000590945	5.58171
YGL039W	1.1838	8.23551e-05	0.000590945	6.47715
YER066W	1.72875	8.24105e-05	0.000590945	3.99592
YNL242W	1.65197	8.24613e-05	0.000590945	6.49352
YOR178C	3.58316	8.24619e-05	0.000590945	3.08783
YGR122C-A	2.0962	8.26529e-05	0.000591626	2.91072
tN(GUU)N1	3.89301	8.28452e-05	0.000592315	2.51101
YHR113W	1.48023	8.29999e-05	0.000592445	7.44983
YBR186W	4.10096	8.30558e-05	0.000592445	1.698
YCL049C	1.96593	8.3503e-05	0.000594947	6.32733
YJL185C	2.03024	8.40896e-05	0.000595973	4.96293
YIL165C	2.81661	8.47848e-05	0.000597427	8.44652
YCR107W	1.29368	8.49093e-05	0.000597427	5.75905
YGR019W	3.03103	8.53019e-05	0.000599447	8.74315
YIL045W	1.72698	8.63577e-05	0.000605486	5.16032
YFR025C	1.72663	8.69913e-05	0.000607854	8.11876
YIR038C	2.03203	8.74126e-05	0.000610106	7.497
YNL101W	1.90656	8.75886e-05	0.000610643	8.64513
YLR356W	2.39412	8.77712e-05	0.000611225	6.95785
YKR021W	1.32032	8.80426e-05	0.000612423	7.15495
YPR020W	1.14687	8.87968e-05	0.000616211	6.14306
YDL206W	1.68849	8.95549e-05	0.000618059	5.86898
YGR203W	1.22402	9.04816e-05	0.000621661	5.47635
YER023C-A	2.6302	9.07829e-05	0.000621661	2.8744
YMR154C	1.57809	9.1461e-05	0.000623582	5.25785
YDL171C	1.93738	9.26724e-05	0.000630227	10.4061
YOR202W	1.91358	9.28555e-05	0.000630252	9.01345
YEL006W	1.23514	9.37378e-05	0.000634842	7.31353
YLR346C	2.58993	9.5214e-05	0.000641368	3.29087
YBR166C	1.47059	9.52217e-05	0.000641368	7.29379
YJL127C-B	1.35239	9.64452e-05	0.000643783	6.34557
YEL068C	1.25196	9.6498e-05	0.000643783	5.50585
YMR279C	2.88137	9.67068e-05	0.000644329	3.79139
YMR135C	1.67599	9.70787e-05	0.000645411	7.72061
YMR090W	1.6107	9.79059e-05	0.000650209	6.07441
YPL033C	4.90064	9.93504e-05	0.000656881	6.13607
YLL046C	3.37547	9.94434e-05	0.000656881	2.25106
YKR105C	3.81524	0.000100416	0.000661888	1.43909
YNL063W	1.20036	0.000100597	0.000662371	5.59552
YFL061W	2.90784	0.000101054	0.000663963	2.52157
YOR376W-A	2.39104	0.000101581	0.000666002	3.2212
YNL311C	2.12302	0.000102812	0.000670504	7.73798
YBL015W	2.19252	0.000103176	0.000670504	6.8088
YIL166C	1.82356	0.000103312	0.000670504	3.37519
YBR297W	2.79899	0.000104321	0.000670504	5.64222
YPL171C	2.10302	0.000104758	0.000670504	2.78119
YOR383C	1.29545	0.000104831	0.000670504	5.61925
YEL060C	2.79646	0.000104878	0.000670504	9.59349
YOR377W	1.3182	0.000104992	0.000670504	6.14032
YIL028W	1.72717	0.000105205	0.000670504	3.63178
YOL119C	2.86517	0.000105662	0.000671605	9.87332
YKL218C	2.61105	0.000105704	0.000671605	9.64274
YNL142W	4.40748	0.000105944	0.000672178	12.1054
YDL243C	1.39391	0.000106217	0.000672184	4.54584
YLR100W	1.4182	0.000106241	0.000672184	7.88987
YPL148C	1.40122	0.000106341	0.000672184	4.46668
YJR131W	1.44052	0.000106931	0.000673365	6.47537
YFL021W	1.39905	0.000107279	0.000673365	7.469
tF(GAA)D	4.0717	0.000107293	0.000673365	1.67175
YMR287C	1.48388	0.000107946	0.000676582	6.35836
YER039C	2.38442	0.000108025	0.000676582	4.79125
YMR169C	1.96283	0.000108302	0.000676945	4.66457
YDR014W-A	2.70968	0.000108932	0.000677233	1.91068
YJR155W	2.88399	0.000109188	0.000677233	6.81715
YCL039W	1.36584	0.000109228	0.000677233	6.39924
YLL059C	1.96191	0.000109735	0.000679693	3.21413
YBR019C	2.79095	0.000110079	0.000681141	1.62581
YIL029C	1.34638	0.000110735	0.00068234	4.68736
YIL101C	2.80278	0.000111833	0.000686482	3.14018
YMR316W	1.23523	0.000112014	0.000686905	5.84275
YCL052C	1.23467	0.000112381	0.000687231	6.60966
YPL194W	1.35451	0.000112505	0.000687231	5.56738
YJR110W	1.3722	0.000112687	0.000687611	6.48291
YOL019W	2.09245	0.00011295	0.00068786	8.42991
YIR018W	1.11928	0.000113352	0.000688462	5.76817
YOR080W	1.18818	0.000113505	0.000688518	6.43551
YOR104W	1.35938	0.000115381	0.000695786	5.30012
YAL067C	1.33116	0.000116058	0.000697625	4.575
YDL159W	1.36761	0.000116248	0.000697625	5.97364
YOR363C	1.78739	0.000116252	0.000697625	7.4091
YPR006C	1.43145	0.000116841	0.000700479	4.66286
YDL066W	2.85766	0.000116987	0.000700674	11.8602
YJL210W	1.45933	0.000117649	0.000703266	6.54859
YMR008C	1.71662	0.000120001	0.000715937	7.67702
YCR098C	1.79592	0.000124132	0.000734772	3.47469
YMR196W	2.70425	0.000124225	0.000734772	7.57188
YMR095C	1.57316	0.000124498	0.000734781	8.29053
YMR019W	1.99791	0.00012459	0.000734781	8.1525
YOR041C	2.53087	0.000128011	0.000750649	2.1703
YPR195C	1.9543	0.00012883	0.000751744	4.33142
YHR037W	1.75685	0.000129014	0.000751744	7.9197
YIL042C	1.53316	0.000129054	0.000751744	6.1302
YHR074W	1.28579	0.000129155	0.000751744	7.84582
YPL186C	1.70243	0.00013085	0.000757129	4.35537
YAL030W	1.48963	0.000131002	0.000757129	6.5452
YNL295W	1.15737	0.000131039	0.000757129	5.90385
YBR018C	1.97477	0.000131466	0.000758638	2.96662
YPL110C	1.36553	0.000132667	0.000762714	6.69915
YGL062W	3.95948	0.000132928	0.000763502	11.2004
YAL056W	1.2764	0.000133879	0.000766718	7.92833
YDL059C	1.0645	0.000134124	0.000766718	6.13673
YPR003C	1.47224	0.000134235	0.000766718	6.37126
YJL110C	1.27932	0.000134496	0.000767235	6.97353
YGL259W	3.28128	0.000134983	0.000768142	2.40413
YER119C	2.01048	0.000135806	0.000771347	7.36201
YMR253C	1.68935	0.000136712	0.000773543	6.01569
YPL002C	1.16436	0.00013681	0.000773543	6.03018
YHL042W	1.95057	0.000138014	0.000777333	2.88216
YBR278W	1.06633	0.000138035	0.000777333	5.83387
YPL222W	1.62677	0.000138447	0.000777705	5.51111
YOR005C	1.11493	0.000138503	0.000777705	5.30816
YGR161C	4.20916	0.000138556	0.000777705	8.50715
YFR022W	1.21428	0.000138824	0.00077799	5.42389
YKL023W	1.76643	0.000139124	0.00077799	6.88799
YOL036W	1.24336	0.000139161	0.00077799	7.93243
YKL061W	1.4826	0.000140211	0.000781889	5.15201
YMR042W	1.46879	0.000140671	0.000782451	6.20156
YAL054C	1.34899	0.00014083	0.000782631	4.57505
YPR198W	1.40986	0.000141475	0.000784797	7.44795
YMR221C	1.34046	0.000141931	0.000785911	7.84355
YHR017W	1.17222	0.000143193	0.000790801	6.00127
YBR222C	1.15216	0.000143199	0.000790801	6.95262
YDR058C	1.18529	0.000143874	0.000793821	5.08821
YJR027W	2.01382	0.00014475	0.000797323	5.17721
YNL228W	2.46155	0.000144896	0.000797323	1.90316
YDL236W	1.35256	0.000144897	0.000797323	8.37504
YFR006W	1.28759	0.000147322	0.000806346	7.83738
YBR085C-A	2.53475	0.000149304	0.000812795	8.74307
YLR191W	1.28764	0.000149423	0.000812795	6.28896
YGR032W	2.01327	0.000149934	0.000814172	8.14742
YNR069C	3.68206	0.000149941	0.000814172	8.23791
YIL164C	2.97987	0.000150455	0.000816245	8.98356
YJR154W	2.96923	0.000151141	0.00081735	6.66709
YKR033C	8.60844	0.000151389	0.00081735	0.828501
YCL064C	2.53115	0.000151512	0.00081735	4.88649
YHR199C	1.11549	0.000151526	0.00081735	7.041
YKL133C	1.47684	0.000151848	0.00081735	5.01884
YDL138W	1.34116	0.000151949	0.00081735	6.78757
YGL202W	2.02573	0.000151985	0.00081735	11.3884
YJR029W	1.90934	0.000153159	0.000821147	2.79826
YNL159C	1.11548	0.000153357	0.000821147	5.82082
YDL104C	1.40959	0.000153612	0.000821635	5.14056
YIL156W	1.1488	0.000154008	0.000821635	6.4854
YDR369C	1.1694	0.000154299	0.000821635	5.16302
YGR066C	2.81739	0.00015433	0.000821635	2.15
YAL049C	1.14286	0.000154539	0.000821635	6.20938
YDR309C	1.08921	0.000154761	0.000821635	6.9375
YJL133C-A	2.24899	0.000154818	0.000821635	9.59899
YNL093W	4.40066	0.000156812	0.000827987	1.4276
YGL114W	1.69235	0.000157389	0.000829052	8.38986
YDR265W	1.16176	0.00016012	0.000841276	5.95103
YJL141C	1.09767	0.000161817	0.000844632	6.38834
YHR111W	1.2749	0.000161855	0.000844632	6.62141
YDR098C-B	2.55775	0.000162549	0.000846819	4.16708
YBR005W	1.133	0.000164408	0.000852186	5.93149
YKR046C	3.11054	0.000164583	0.000852373	7.66125
YHR210C	2.16498	0.000164893	0.000852546	3.92082
YDL086W	1.17735	0.000165928	0.000855221	7.7334
YIL007C	1.65885	0.000165965	0.000855221	5.35633
YER176W	1.84283	0.000166699	0.000858284	8.2281
YPL236C	1.16637	0.000168086	0.000864703	5.66302
YOL113W	1.11441	0.000168493	0.000866076	6.34413
YOR238W	1.52648	0.000170888	0.000875464	5.97871
YCR020C-A	1.22738	0.000171039	0.00087551	5.93158
YDR259C	1.66544	0.000174099	0.000887489	3.4347
YPR178W	1.10279	0.000174523	0.000888914	5.99299
YKL129C	1.70985	0.000174907	0.000890134	6.55677
YPL006W	1.26811	0.000175779	0.000893834	7.40537
YOR364W	1.99829	0.000175989	0.000894163	2.55202
YPL166W	2.13453	0.000176176	0.000894264	4.80457
YNR056C	2.03822	0.000177987	0.000900601	3.45015
YMR018W	1.85806	0.000178983	0.00090261	3.12991
YJL202C	2.66885	0.000181137	0.000909819	1.45638
YLL039C	2.12138	0.0001815	0.000910899	9.49637
YHR175W	1.35893	0.000181804	0.000910943	6.9884
YBR272C	1.28596	0.000183318	0.000915551	5.8067
YGR174C	1.23905	0.000186639	0.000928722	5.99394
YKL208W	1.214	0.000186881	0.000928722	4.59675
YDL231C	1.25635	0.000186985	0.000928722	8.03275
YIL066C	2.42705	0.000188203	0.000933329	3.76382
YER139C	1.17451	0.000188908	0.00093438	4.95375
YGL229C	1.91585	0.000189198	0.000934486	6.10254
YGR110W	1.81865	0.000189232	0.000934486	5.43867
YDR179W-A	1.10046	0.00019052	0.00093859	5.97871
YKR039W	3.29206	0.000191222	0.000941297	11.9404
YDR314C	1.07594	0.000191857	0.000943317	5.32859
YPL070W	1.38794	0.000191939	0.000943317	6.42149
YJL103C	1.95331	0.000194298	0.000951877	4.49301
YPR158C-D	2.11817	0.000195605	0.000954738	5.88198
YOL164W	1.33812	0.000195657	0.000954738	6.29899
YKR098C	1.11462	0.000197173	0.000959636	5.28361
YPR083W	1.60457	0.000198276	0.000960852	6.53468
YPR145C-A	3.22654	0.000198469	0.000960852	2.34932
YBL078C	2.50389	0.000199152	0.00096308	5.6046
YPL036W	1.89473	0.000200128	0.000966608	5.81562
YPR098C	1.24592	0.000201024	0.000969299	6.29478
YDR059C	1.99151	0.0002012	0.000969299	6.20363
YLR178C	2.49276	0.000201846	0.00097034	6.62412
YNR070W	1.45265	0.00020249	0.000971408	3.5982
YEL028W	1.57828	0.000202541	0.000971408	3.92019
YCR091W	1.33953	0.000203332	0.000973686	4.8792
YGL053W	1.57974	0.000203691	0.000974648	5.45433
YGR174W-A	2.93281	0.000204548	0.000977625	2.88198
YHR100C	1.37789	0.000209536	0.000996594	5.8185
YFL041W-A	2.26662	0.000209894	0.000996594	3.77786
YJL132W	1.53333	0.000210513	0.000997228	4.76862
YFR023W	3.79128	0.000211522	0.00099951	1.68711
YGR268C	1.24449	0.000212514	0.00100208	5.82379
YJR039W	1.74865	0.000214244	0.00100793	6.02033
YDR380W	3.23913	0.0002162	0.00101538	3.9388
YLR348C	1.29629	0.000216404	0.00101538	8.55462
YIL017C	1.38489	0.000216487	0.00101538	6.23262
YKR014C	1.36649	0.000218456	0.00102073	7.99842
YPL041C	1.18617	0.000221228	0.00103231	4.39943
YJL060W	1.68073	0.000221436	0.00103231	8.36723
YBR128C	2.03052	0.00022366	0.00103953	4.34569
YDR010C	3.60427	0.000226352	0.00104641	1.25458
YDL234C	1.31242	0.000229835	0.00105638	6.56534
YDR383C	1.13306	0.000229856	0.00105638	5.53937
YNR066C	2.24337	0.000233566	0.00106865	5.56786
YPL262W	1.50345	0.00023437	0.00107074	8.76496
YDR371W	1.15277	0.0002359	0.00107533	5.95453
YCR106W	1.48062	0.000237735	0.00108139	6.02172
YBR045C	2.71801	0.000237931	0.00108139	4.61445
YOL055C	1.07895	0.000238411	0.00108277	5.37697
YIL077C	1.22024	0.000238989	0.0010838	5.87645
YDR322C-A	1.21118	0.000242824	0.00109796	7.36734
YKR076W	2.25651	0.000245082	0.0011058	5.48416
YDR419W	1.15133	0.000245511	0.00110583	6.18701
YPL265W	3.11172	0.000247168	0.00110866	11.1976
YMR238W	1.37034	0.00024918	0.00111444	8.30837
YER138W-A	2.29525	0.00025326	0.00112615	4.30247
YIL087C	1.71041	0.000254096	0.00112824	5.04042
YBL080C	1.13866	0.00025428	0.00112824	5.13433
YGR197C	1.90903	0.000255437	0.0011319	6.26423
YMR315W-A	4.0303	0.000255472	0.0011319	1.10021
YIL061C	1.49908	0.000256761	0.00113679	5.8805
YOR351C	3.22945	0.000259515	0.00114405	0.614213
YPR064W	3.0595	0.000261033	0.00114799	0.933713
YPR002C-A	2.90749	0.000261765	0.00114986	1.58293
YPR111W	1.70532	0.000262705	0.00115235	6.87157
YFL054C	1.35358	0.000263105	0.00115328	4.96911
YPR201W	1.75274	0.000264373	0.00115556	3.18203
YGR213C	3.27906	0.000265218	0.00115761	1.46676
YHR194W	1.22811	0.000266154	0.00116087	6.25685
YFL010C	1.21562	0.000266458	0.00116137	8.35544
YPL274W	1.29488	0.000269098	0.0011671	8.35989
YOR292C	1.22787	0.000270657	0.00116985	4.96182
YBL102W	1.46763	0.000270963	0.00116985	7.86287
YDL230W	1.6104	0.000271092	0.00116985	5.89807
YGL007W	3.64198	0.000271424	0.00116985	2.06071
YDR070C	4.00168	0.000275662	0.00118226	4.70595
YML118W	2.12574	0.000275999	0.00118288	4.43973
YMR050C	2.05741	0.000277089	0.00118436	3.92478
YDR435C	1.14922	0.000279226	0.00118841	5.94104
YPL136W	3.35559	0.000279689	0.00118841	0.52543
YDR525W-A	1.37688	0.000280391	0.00118879	6.73803
YNL041C	1.09847	0.000281792	0.00119278	7.00113
YPL119C-A	2.17002	0.000284524	0.00120351	2.64952
YNL156C	1.19219	0.000285834	0.0012074	7.67009
YBR104W	1.46321	0.000286832	0.00120996	8.12181
YLR023C	1.28432	0.000287342	0.00121045	7.79448
YER185W	2.45737	0.000287918	0.00121122	3.48673
YIL097W	1.67916	0.00028954	0.00121556	5.15195
YOR192C	1.48584	0.000291204	0.00122088	4.82035
YER175C	3.98538	0.000292497	0.00122463	10.2445
YOR044W	1.28881	0.00029274	0.00122482	6.09924
YAL053W	1.17445	0.000296988	0.00123835	8.14953
YML099C	1.11898	0.000297181	0.00123835	7.35705
YDR223W	1.77015	0.000297766	0.00123995	3.43933
YGR121C	1.24295	0.000298304	0.00124013	7.69517
YPR010C-A	1.17744	0.000299038	0.00124102	5.8147
YGL219C	1.58302	0.000299634	0.00124102	7.26937
YIL058W	3.28963	0.000300394	0.00124334	1.24759
YMR092C	1.13756	0.000302706	0.00124885	7.66253
YLR080W	1.91571	0.000302738	0.00124885	4.67896
YKL157W	1.3283	0.000303392	0.00125026	8.46133
YGR125W	1.24999	0.000304648	0.00125337	8.04357
YDR262W	1.22711	0.000305843	0.00125577	7.2049
YHL027W	1.40557	0.000307678	0.00126059	8.12628
YHR051W	1.1061	0.000307835	0.00126059	7.2229
YBR250W	2.0699	0.000308578	0.00126198	3.53136
YJL201W	1.17162	0.000309169	0.00126353	6.77029
YIL071C	1.12061	0.000309831	0.0012654	5.48134
YBR169C	1.58563	0.000311561	0.00126994	5.96474
YNL183C	1.70222	0.000312177	0.00127077	7.21274
YHL021C	2.55446	0.000312777	0.00127237	6.28786
YDL035C	1.35956	0.00031452	0.00127643	7.80071
YNL130C-A	3.91682	0.00031463	0.00127643	0.492003
YPR005C	1.37304	0.000314974	0.00127643	3.91089
YIL152W	1.23539	0.000314986	0.00127643	5.76383
YOL163W	1.65649	0.000315484	0.00127643	3.05506
YHR171W	2.16862	0.000315637	0.00127643	5.37822
YGL140C	1.29623	0.000318213	0.00128431	8.40411
YCL048W	3.29009	0.000320573	0.00129299	1.24664
YKL072W	1.18097	0.000322002	0.0012979	6.3791
YER152C	1.09868	0.000325031	0.00130526	7.3669
YGL258W-A	2.66664	0.000325309	0.00130526	1.59196
YJL022W	3.47068	0.000325918	0.00130685	1.51936
YOL016C	1.837	0.000326452	0.00130814	7.34492
YFL028C	1.6425	0.000328981	0.00131742	7.83418
YLR161W	3.60747	0.000330098	0.00132104	2.32297
YDR377W	1.11301	0.000331307	0.00132244	7.60395
YPL280W	3.88065	0.000332076	0.00132379	2.42346
YBR035C	1.42024	0.000332349	0.00132403	8.6079
YDR018C	1.87749	0.000333063	0.00132601	2.39004
YML045W	2.02137	0.000334728	0.00132921	2.19262
YBR012W-B	2.09528	0.000336868	0.00133427	4.01446
YIL102C-A	1.43876	0.000339277	0.00133864	4.72005
YDR136C	4.89584	0.000341543	0.00134586	0.506
YBR255W	1.07235	0.00035407	0.00138164	6.53609
YLR456W	1.15877	0.000359306	0.00139798	4.3777
YJL100W	1.16935	0.000359928	0.00139952	6.05668
YIR018C-A	3.0452	0.000360218	0.00139976	1.5448
YIR030W-A	3.4068	0.000361753	0.00140484	0.570166
YEL067C	1.94583	0.00036564	0.00141637	3.96528
YEL029C	1.28605	0.000366138	0.0014171	6.64406
RNA170	2.21486	0.000366713	0.00141779	1.95295
YIL121W	1.49557	0.000371313	0.00142936	9.56455
RUF20	1.51102	0.000372513	0.00143219	3.3864
YJR035W	1.09481	0.000373991	0.00143535	6.31207
YIR041W	3.82938	0.000374378	0.00143535	0.6939
YBR109C	1.20648	0.000374388	0.00143535	8.75177
YOR228C	1.22951	0.00037702	0.00143964	5.37554
YER037W	3.1422	0.000378946	0.00144519	6.61214
YBR047W	3.05187	0.000384323	0.00146048	6.45842
YPR159C-A	4.31902	0.000384956	0.00146089	0.0147885
YAR068W	3.83602	0.000388049	0.00147131	0.0799571
YHR105W	1.25315	0.00038881	0.0014728	4.16047
YDR178W	1.52304	0.000389388	0.00147408	6.87903
YMR118C	4.38216	0.000391213	0.00147646	1.95501
YJR151C	1.31744	0.000391216	0.00147646	4.36604
YIL056W	1.97855	0.000396734	0.0014909	7.85378
YHR063C	1.19569	0.000397945	0.00149363	7.94667
YDR261C-D	1.48238	0.000398619	0.00149446	4.53214
YBR293W	1.47049	0.000399406	0.00149537	6.01563
YER081W	1.80702	0.000403295	0.00150283	9.6283
YGR244C	1.7149	0.000403835	0.00150283	8.65613
YCR024C	1.25378	0.000404297	0.00150283	5.29416
YOR389W	1.26746	0.000404849	0.00150397	3.75181
YIL088C	1.32718	0.000406233	0.00150639	8.79335
YEL071W	2.25232	0.000407889	0.0015098	11.5812
YFL030W	2.14498	0.000411584	0.00151983	4.84026
YGR256W	2.41567	0.000418212	0.00153602	2.6177
YOR120W	1.52928	0.000418959	0.00153784	5.93785
YGR161C-D	2.13793	0.000420999	0.0015435	5.31286
YKL141W	1.25432	0.000432566	0.00157003	7.72863
YJR156C	1.55121	0.000433334	0.00157189	3.0993
YBL103C	1.51712	0.00043401	0.00157256	7.39826
YLR005W	1.09837	0.00043544	0.00157489	7.02928
YDR284C	1.50301	0.000438353	0.00158357	7.7303
YDR358W	1.54612	0.000442912	0.00159351	5.31246
YJR130C	2.92131	0.000444848	0.00159953	9.16039
YGR144W	1.7478	0.000449446	0.00161243	2.46705
YER024W	3.98737	0.000452475	0.00162034	10.0021
YKR009C	1.21504	0.000454631	0.00162523	5.19004
YOR130C	2.08818	0.000460236	0.00163926	8.24972
YKL107W	3.42311	0.000460306	0.00163926	1.67997
YIL099W	2.87651	0.000460685	0.00163926	2.97458
YJL045W	2.07027	0.000462034	0.00164311	1.94986
YBR240C	1.44505	0.000463321	0.00164674	3.47124
YHR139C	2.25259	0.000466876	0.0016546	2.34404
YNL279W	1.80725	0.000473501	0.00167231	2.28906
YBR287W	1.20846	0.000476176	0.0016808	8.09309
YNL115C	1.65304	0.000476718	0.00168175	7.11774
YLR211C	1.36121	0.000485983	0.00170662	6.19888
YGR153W	1.34414	0.000494037	0.00172354	3.83654
YBR149W	1.749	0.000494317	0.00172354	8.32555
YGL096W	1.44877	0.000504188	0.00175257	4.10646
YJL071W	1.95642	0.000507552	0.00175992	7.38286
YPL252C	1.23049	0.00051011	0.00176523	7.49168
YER128W	1.09193	0.00051012	0.00176523	4.81425
YNL331C	1.07482	0.000511209	0.001768	4.85418
YNL057W	1.85165	0.000511499	0.00176801	1.84754
YNL226W	3.39559	0.00051703	0.00178513	1.56494
YJL144W	2.28076	0.000517565	0.00178597	5.1524
YCL017C	1.0764	0.000518283	0.00178745	7.64808
tH(GUG)K	7.78689	0.000522749	0.00179925	0.0964374
YNL092W	2.23389	0.000525916	0.00180872	3.68167
YKL065C	1.4027	0.000529114	0.00181588	8.1017
YLL016W	1.37931	0.000529177	0.00181588	5.30437
YBR124W	5.15635	0.000530214	0.00181748	-0.0307574
YHR189W	1.14489	0.000530235	0.00181748	3.7871
YOL165C	2.91826	0.000534546	0.00182672	0.527455
tL(CAA)G3	5.40014	0.000534728	0.00182672	0.178478
YGR273C	5.23332	0.000537587	0.00183148	0.0359523
YAL048C	1.42024	0.000543941	0.00185006	6.26004
YNL194C	2.9053	0.000545684	0.00185394	1.78768
YDR402C	2.34031	0.000551357	0.00186601	0.962722
YGL015C	2.27005	0.000562042	0.00189179	1.13244
YFL004W	1.06237	0.000564007	0.00189544	8.68165
YER040W	1.48864	0.000565675	0.00189883	7.22938
YOR193W	1.12384	0.000568324	0.00190669	4.95111
YGR267C	1.1971	0.000578165	0.00193234	8.88956
YER078W-A	3.24901	0.000579175	0.00193467	0.953676
YOR185C	2.66711	0.000583136	0.00194473	6.51075
YCR023C	1.4312	0.000585607	0.00195186	8.13438
YMR262W	1.91484	0.00059758	0.00198645	6.09818
YNL146C-A	2.13962	0.00059904	0.00198916	1.39822
YOL024W	2.2291	0.000605202	0.00200456	1.02947
YCR036W	1.19977	0.000605303	0.00200456	6.92049
YAR009C	1.45366	0.000608318	0.00201238	4.93134
YMR063W	1.32748	0.000612241	0.00201994	5.13948
YBL039W-B	1.21555	0.000616565	0.00203094	4.68322
YDR077W	1.80184	0.000623203	0.00205062	11.7647
YPL191C	1.4714	0.000623596	0.00205081	4.85721
YHR180W	1.50009	0.000632326	0.00206888	3.56248
YDR476C	1.18148	0.000632989	0.00206888	6.1094
YJR153W	7.58521	0.000635567	0.00207358	-0.0776065
YAR050W	1.27278	0.000653453	0.00211848	3.60163
YPL113C	1.84867	0.000654069	0.00211936	3.54848
YBR299W	2.49949	0.000667512	0.00215499	1.09058
YDR481C	1.73969	0.00067318	0.00216648	9.67636
YOR036W	1.87662	0.000673708	0.00216705	6.49067
YHR193C-A	2.29516	0.000675174	0.00217041	1.00776
YAL037C-A	5.01822	0.000680858	0.00218094	-0.147102
YOR032C	1.926	0.000681402	0.00218155	2.3869
YCR104W	3.1339	0.00068187	0.00218163	1.90995
snR62	1.75882	0.000682134	0.00218163	2.80341
YCR005C	3.31954	0.000695223	0.00221773	11.4268
YHR071W	1.50246	0.00070157	0.00223451	10.0338
YMR306C-A	2.21515	0.00070387	0.00223952	1.09258
YJL072C	1.47133	0.000706507	0.00224443	6.3318
YGR292W	2.95913	0.000712296	0.00225953	1.29486
YMR251W-A	1.81571	0.000712333	0.00225953	10.6555
YHR176W	1.44107	0.000713627	0.00226006	5.63089
YOL047C	1.81453	0.000726581	0.00229637	1.60365
YGR088W	1.9784	0.000728515	0.00229971	5.44725
YDR009W	1.42452	0.000740042	0.00232461	2.64912
YKL124W	1.23265	0.000746139	0.0023386	5.1732
YCL074W	7.76543	0.000746395	0.0023386	0.0768306
YCL038C	1.2472	0.000747098	0.00233962	5.73985
YMR017W	2.01755	0.000747662	0.00234019	1.50272
YDR524C-A	3.16848	0.000753268	0.00235415	-0.118866
YJR038C	7.31933	0.000757528	0.00236387	-0.303018
YBR201C-A	1.33873	0.000768417	0.00238938	3.22556
YLR252W	2.27593	0.000782981	0.00242147	1.70586
YBR046C	2.74683	0.00078701	0.00243118	7.82942
tK(CUU)M	2.28572	0.000797892	0.00245993	0.744085
YOR152C	1.50861	0.000807008	0.00248307	4.31651
YOL082W	1.36184	0.000809743	0.00249024	6.73564
YMR096W	1.62969	0.000830358	0.00253495	11.9701
YOL131W	3.49503	0.000838009	0.00255297	-0.193848
YGR027W-B	1.60277	0.000842138	0.00256174	4.73267
YLR158C	7.41278	0.000845136	0.00256707	-0.22408
YHR161C	1.91172	0.000847131	0.00257186	8.05048
YPL270W	1.14803	0.000863696	0.00261185	7.55839
YJL163C	2.01516	0.000866243	0.00261699	5.19518
YKL026C	1.2754	0.000868418	0.00262099	3.09007
YFL020C	2.69297	0.000872363	0.00262903	1.32415
YMR284W	1.19336	0.000873319	0.00262934	5.35616
tN(GUU)P	2.73232	0.000880753	0.00265043	1.76046
YHR101C	1.08809	0.000883166	0.0026538	5.3916
YGL180W	2.74912	0.000884512	0.00265655	7.07474
YJL048C	1.17844	0.000885859	0.0026593	6.05059
YBR256C	1.8651	0.000887469	0.00266099	9.69712
YDL041W	3.07464	0.000887715	0.00266099	0.658375
YOR333C	3.3268	0.000890973	0.00266816	0.275487
YJR095W	2.95167	0.000900156	0.00269173	-0.0249748
YCR102W-A	1.97961	0.000911813	0.00271868	1.69099
YNL333W	1.66137	0.000918834	0.00273432	1.83306
YGL010W	1.11066	0.000920934	0.00273925	4.56766
YDR504C	1.28611	0.000923994	0.00274437	4.12225
YDL130W-A	2.17946	0.000924616	0.0027449	6.29522
YDR034C	1.09919	0.000927379	0.00274591	8.31079
YLR307W	3.144	0.000932224	0.00275692	1.70575
YLR349W	1.79493	0.000932245	0.00275692	1.80639
YLR290C	1.58387	0.000935149	0.00276286	6.48025
YHR138C	1.56582	0.000935641	0.00276299	5.43231
YFL010W-A	1.53943	0.000939811	0.00277132	2.52289
YLR461W	2.27408	0.000956334	0.00281331	1.60316
YIR014W	1.19578	0.000967016	0.00283931	3.55699
YBL016W	2.9501	0.000968274	0.00284165	2.34711
YGL146C	1.76395	0.000969082	0.00284267	3.31316
YBR180W	2.11493	0.000971418	0.00284411	1.321
YGL224C	2.17373	0.000974422	0.00285155	8.82366
YPL123C	2.54017	0.000990098	0.00288783	6.21761
YMR057C	3.74512	0.000994725	0.00289721	0.627219
YDR475C	1.12688	0.00099654	0.00290112	6.43208
YER058W	1.62409	0.00100798	0.0029289	5.17293
YML076C	1.22651	0.00101099	0.00293627	6.92171
YGL183C	1.9528	0.00101603	0.00294673	2.29785
YMR175W	2.35918	0.00102639	0.00297127	1.63132
YER039C-A	2.18388	0.00102722	0.00297218	2.39937
YNL055C	1.34245	0.00103616	0.00299384	10.2059
YCR081W	1.16696	0.00104359	0.00301389	6.20296
YJL027C	2.72599	0.00104944	0.00302654	0.0205234
YKL162C	1.1117	0.00105363	0.00303434	3.43542
YHL002C-A	2.28052	0.00106096	0.00305028	1.56823
YHR124W	1.25993	0.001068	0.00306286	3.42688
YOL114C	1.2868	0.00106865	0.00306329	3.15729
YKL211C	1.87968	0.00108255	0.00309595	9.53991
YKL097C	2.50578	0.00109527	0.00311641	0.603861
YLR322W	3.32835	0.00111435	0.00315612	-0.326469
YDR374C	2.21416	0.00111687	0.00316037	0.691903
YOR142W	1.45152	0.00111954	0.00316355	8.95498
YNL077W	1.14929	0.00112528	0.0031754	6.56689
YOR386W	1.79542	0.00112904	0.00318456	4.75337
YGL063C-A	4.31949	0.00113111	0.00318894	0.491456
YOL048C	1.64931	0.00113188	0.00318966	6.1101
YER011W	1.76728	0.00114222	0.00321473	1.40369
YOR285W	1.08564	0.00114899	0.00323196	7.36608
YMR194C-B	1.34868	0.00115454	0.00324017	4.95914
YOR375C	1.44586	0.00116006	0.00325162	11.5787
YEL057C	2.70079	0.00116882	0.00327138	0.980352
YER135C	3.49847	0.00119007	0.00330724	1.16018
YDR529C	1.10921	0.00119131	0.00330724	7.71168
tG(GCC)M	5.18288	0.00119335	0.00331141	0.758307
YER138C	2.23868	0.00119958	0.00332122	0.796458
YDR204W	1.27739	0.00120218	0.00332542	6.16822
YDR043C	1.7832	0.00120376	0.0033283	4.24236
YNL305C	1.31184	0.00121585	0.0033572	6.36395
YKL062W	1.19873	0.00123276	0.00339781	6.86692
YDL180W	1.11746	0.00124272	0.00341913	6.92768
YPL250C	2.46436	0.00126374	0.00346317	8.96297
YNL192W	1.09489	0.00127217	0.00347842	7.88196
YOR230W	1.14487	0.00128405	0.00350406	9.21555
YAL028W	1.75624	0.00128495	0.00350406	3.92778
YOL083W	2.09092	0.00129488	0.00352177	4.27003
YBR006W	2.25323	0.00129739	0.00352706	7.17607
YPR078C	3.78873	0.00129971	0.0035318	-0.414008
YLR257W	1.10097	0.00130167	0.00353402	8.8055
YDR255C	1.10808	0.00130457	0.00353689	4.64169
YDR403W	1.44296	0.00130803	0.00353845	2.26185
YOL118C	3.16315	0.00130818	0.00353845	0.143001
YNL012W	1.2738	0.00130905	0.00353845	2.81498
YNL208W	1.21223	0.00131062	0.0035396	8.71547
YNL043C	1.24712	0.00131243	0.00354136	3.12897
YLR138W	1.49606	0.00135363	0.00362558	8.59808
YFL052W	2.67533	0.00136518	0.00365333	1.4657
YDL010W	1.17216	0.00138089	0.00368896	6.79774
YNL227C	1.18939	0.00139939	0.00373191	7.32025
YEL049W	3.91867	0.00140214	0.0037344	1.00822
YOR289W	1.72579	0.00144154	0.00382116	5.30814
YLL037W	2.06011	0.00144499	0.00382703	1.04266
YBR043C	1.38149	0.00144913	0.00383468	8.80997
YOL085C	3.25258	0.00146322	0.00386533	-0.382833
YHR071C-A	1.37793	0.00147297	0.00388529	2.15344
RDN5-5	3.35347	0.0014733	0.00388529	0.294335
YHL012W	2.87894	0.0014804	0.0038972	0.331485
YOL037C	2.58579	0.00149078	0.00391631	0.544029
YNL104C	1.75238	0.0014956	0.00392729	11.8509
YEL024W	1.34975	0.00150373	0.00394193	6.52758
YDL021W	1.72883	0.00150665	0.00394454	4.90045
YOL108C	1.24989	0.00154039	0.00402092	5.99638
YIL116W	1.27517	0.00155796	0.0040565	9.65153
YOR034C-A	1.57346	0.00155896	0.00405739	1.57117
YGR022C	4.48649	0.00156792	0.00407725	1.89375
YNR058W	1.84243	0.0015754	0.00408994	6.1118
YBR178W	3.34167	0.00157545	0.00408994	0.0170562
YGL026C	1.15742	0.00158099	0.00409741	10.16
YLR299W	2.09326	0.00160151	0.00414189	8.58128
YHR157W	1.45891	0.00160606	0.00415191	2.19129
tS(AGA)D3	4.79789	0.00160837	0.0041548	-0.328836
YER079W	2.08995	0.00164514	0.00422811	5.78327
YBL064C	1.49992	0.00165516	0.00424679	6.68251
YJR128W	3.2795	0.00165818	0.00425097	0.23904
YPR002W	2.56887	0.00166571	0.00426851	7.60102
YIL107C	1.31943	0.0017161	0.00438123	5.44305
YNL318C	4.21459	0.00172427	0.00439846	-0.0745008
YDL199C	1.92272	0.00173636	0.0044238	4.94016
YLR125W	1.37304	0.00173905	0.00442884	3.38697
YPL264C	2.54002	0.00174408	0.00443981	7.20775
YGR149W	1.18636	0.00175633	0.00446547	6.08764
YMR304W	1.11469	0.0017623	0.00447695	6.8433
YOR161W-A	2.92186	0.00178346	0.00451952	-0.0467562
YIL120W	1.16374	0.00181166	0.00457581	3.70811
YPL152W	1.07858	0.00181281	0.00457581	5.17124
YER179W	1.77559	0.0018131	0.00457581	2.03572
YBR056W-A	1.88858	0.0018281	0.00460236	4.74654
YCR006C	1.79156	0.00186651	0.00467994	3.34787
YHL024W	1.10741	0.00186882	0.00468305	3.57405
YGL138C	3.09562	0.00188818	0.00472659	-0.503732
YPL003W	1.21451	0.00189124	0.00473233	5.366
tM(CAU)P	2.64574	0.00193591	0.00483234	0.715669
YGL074C	4.12619	0.00194793	0.00486008	0.326908
YER068C-A	2.34994	0.0019486	0.00486008	0.484354
YGL141W	1.34223	0.00196001	0.00488456	6.6648
tA(UGC)A	2.7868	0.00197905	0.00492406	-0.410536
YKL187C	1.19426	0.00198529	0.0049356	2.82027
YML039W	1.78419	0.00201602	0.00499191	0.958216
YOL104C	3.10242	0.00204745	0.00504891	3.3418
YHR162W	1.41098	0.00204807	0.00504891	10.8578
YGL024W	1.8078	0.00207968	0.00510844	3.04159
tG(CCC)O	2.17115	0.00214867	0.00524654	0.227138
YLR123C	2.21718	0.00215732	0.00526556	0.264846
YGL069C	1.70261	0.00216601	0.00528126	1.21737
YIL015W	1.86386	0.00220784	0.00536975	2.45646
YBR248C	1.09054	0.00221769	0.00538943	9.46204
YGL117W	2.31827	0.00222981	0.0054125	8.95109
YOR142W-B	2.26262	0.00225735	0.00545998	3.0408
YLR296W	3.1783	0.00226144	0.00546773	-0.441797
YMR062C	1.4734	0.00227201	0.00548682	10.6533
YDR169C-A	2.47056	0.00227388	0.0054892	2.11165
YOR173W	2.43615	0.0022806	0.0055011	4.8325
YLR035C-A	1.88986	0.00229615	0.0055278	2.92414
YBR280C	1.52855	0.00229925	0.00553094	5.16645
YGR243W	1.72103	0.00233029	0.00559033	4.04147
YBR072W	1.5044	0.00239263	0.00571541	3.65308
YOR338W	1.65004	0.00246676	0.00585619	5.86308
YDL198C	1.63834	0.00247112	0.00586357	10.751
YMR034C	1.47263	0.00247555	0.00587026	2.7512
YEL074W	1.89063	0.00253999	0.00599443	1.77848
YHL045W	3.10159	0.00254055	0.00599443	0.31316
YKR106W	1.41325	0.00256375	0.00603992	2.05083
YIL136W	1.37023	0.00257944	0.00606527	6.17602
YPR158W-B	2.16641	0.00260674	0.00611315	3.98941
YMR053C	1.66184	0.00262539	0.00614051	3.99816
YMR082C	6.56566	0.00263124	0.00614954	-0.90629
YHL043W	2.17647	0.00265508	0.00620056	-0.043144
YBR221W-A	6.45176	0.00267865	0.00624613	-0.99241
YIR017W-A	2.44221	0.00268265	0.00625144	2.04867
YLR124W	1.69208	0.00269188	0.00626749	1.11004
YOR343C	1.85515	0.00271269	0.00630642	1.06543
YLR162W	6.45243	0.00273694	0.00634603	-0.992176
YFL062W	1.68805	0.00274619	0.00635618	1.00351
YFL058W	2.59614	0.00276757	0.00639541	-0.295843
YPL219W	1.16692	0.00279864	0.00645541	5.47013
YDL181W	1.73365	0.00282163	0.0064977	4.88441
YMR007W	2.53641	0.00284448	0.00653184	0.0652921
YPR092W	2.26793	0.00289411	0.00662079	-0.138786
YDR034W-B	1.44868	0.00292117	0.00667526	1.48145
YHR018C	2.21333	0.00293138	0.00669362	12.2535
YML057C-A	1.7123	0.00295165	0.00671568	0.641139
YGR068W-A	6.32806	0.00304662	0.00689545	-1.08415
YBR139W	2.1064	0.00305321	0.00690351	7.94765
YPL154C	1.43226	0.00306397	0.00692202	9.82781
YPL092W	1.43193	0.0030789	0.00694555	9.06905
YKR049C	1.1236	0.0030852	0.00695212	4.92258
YPR160W	2.74195	0.00309112	0.00696177	5.28805
YKL178C	1.60247	0.00313513	0.007021	2.29512
YOR347C	1.62471	0.00313926	0.00702771	5.92548
YNL036W	2.6848	0.00317616	0.00709742	9.08811
YIL100W	1.84599	0.00321143	0.00716649	1.00049
YOL103W-B	1.76845	0.00321444	0.00716997	3.73889
YNL128W	1.61977	0.00322562	0.00719221	3.00776
YOL132W	2.01139	0.00323218	0.0071991	0.70772
YER121W	1.72081	0.00328358	0.00729513	2.78137
YBL065W	2.83794	0.00328928	0.00730254	0.103952
YDL242W	4.1108	0.0033066	0.00733571	-0.863363
YIL072W	2.31091	0.00335047	0.00742502	0.856675
YGL059W	2.23133	0.00341144	0.00753573	7.61596
YLR270W	1.38959	0.0034273	0.00756107	6.23006
YDR327W	1.55296	0.00342986	0.00756287	1.20188
YMR194C-A	1.42214	0.00343238	0.00756572	2.50485
YCR045C	2.11992	0.00343946	0.00757242	0.940822
YOR237W	1.59326	0.00344921	0.00758113	2.34433
YNL196C	2.77052	0.00345128	0.00758297	-0.166581
YJL070C	1.11674	0.00346917	0.00761957	5.1376
YLR235C	2.96373	0.00350678	0.00768027	0.204082
YDR035W	1.22604	0.00352633	0.00771878	10.3694
YPR145W	1.41751	0.00357292	0.00780295	11.9499
YDR127W	1.09544	0.00358698	0.00783088	9.9398
YGR107W	1.49313	0.00361718	0.00788283	1.20174
YAR047C	1.47475	0.0036195	0.00788511	1.00736
YGL262W	2.59327	0.00364951	0.00794769	0.417389
YPR137C-B	2.64129	0.00368382	0.00800829	2.15112
YNR001C	2.0451	0.00372789	0.00808125	9.88429
YFL053W	1.80217	0.00375184	0.00811889	1.46651
YGL052W	4.16516	0.00375491	0.00812268	-0.823155
YML084W	2.18846	0.00377833	0.0081676	0.108095
YLR428C	2.84639	0.00390714	0.00838037	1.36364
YJR111C	1.33748	0.00391323	0.00838278	7.25737
YHR137W	1.21027	0.00400102	0.00854115	5.01061
YHL006W-A	1.74114	0.00403304	0.00860355	1.09876
YOR325W	1.96022	0.00403481	0.00860434	0.30278
YKL148C	1.55415	0.0041193	0.00874517	6.71693
YLL025W	1.29491	0.004165	0.00882396	2.45011
YKL065W-A	1.72098	0.00417407	0.0088371	1.57602
YPR197C	2.4106	0.00419654	0.00887857	0.127432
YER096W	1.53177	0.00421518	0.00890578	3.67993
YKL053W	1.47443	0.00428672	0.00902291	1.46671
YOL162W	2.14598	0.00434297	0.00911019	1.96206
YDL114W-A	2.77321	0.00435571	0.00912759	0.242727
YGL184C	1.34618	0.00441268	0.00922815	5.52554
YOR303W	1.28351	0.00446784	0.00930561	10.289
YBL100W-C	2.47976	0.00447746	0.0093225	-0.379482
YFR012W-A	2.36078	0.00451369	0.00938525	-0.0669302
tE(UUC)L	2.76558	0.0045568	0.00944621	-0.743722
YIL046W-A	1.74535	0.00461379	0.00954507	0.669469
YJL160C	1.50386	0.0047894	0.00984559	3.76097
YGR059W	2.04787	0.0047943	0.00985237	-0.137614
YNL223W	1.13647	0.00481999	0.00988868	5.32272
YOR392W	4.26295	0.00487093	0.00996333	-0.746751
YLL055W	1.35162	0.00489324	0.0100023	5.38987
YDR354W	1.26999	0.00494575	0.0101063	8.59359
YGL081W	1.38713	0.00498516	0.01017	1.04126
YJL028W	3.62914	0.00511238	0.010393	-0.536287
YPL114W	1.26727	0.00514247	0.010446	3.19083
YDR250C	3.06615	0.00521452	0.0105749	0.0624128
YDR106W	1.18143	0.00538134	0.0108593	1.54934
YMR153C-A	1.32595	0.00538298	0.0108593	1.04223
YIL113W	1.98608	0.00544585	0.0109754	2.57531
YMR254C	2.61932	0.0055182	0.0111067	-0.534497
YOL052C-A	3.16945	0.00553216	0.0111312	3.0868
YDR365W-B	1.77674	0.00554833	0.0111564	2.6972
YGR018C	1.3412	0.00555311	0.0111624	1.00936
YPL278C	1.25711	0.00556472	0.0111711	1.86721
YPL251W	1.56879	0.00560401	0.0112354	2.06367
YCR010C	1.82774	0.00561719	0.0112508	0.801261
YOL085W-A	1.94171	0.00563263	0.0112671	0.943917
YGL235W	2.08886	0.00575585	0.0114578	0.170955
YLL005C	2.07836	0.00577882	0.0114961	-0.112608
YFL019C	2.39658	0.00580449	0.011536	0.263675
snR55	1.81274	0.00588701	0.0116572	1.30069
YMR141C	2.32147	0.00588817	0.0116572	0.578533
YIL156W-A	1.74538	0.00594302	0.0117469	0.34105
YHL019W-A	1.32389	0.00602469	0.0118665	1.04214
YMR321C	1.66624	0.00627305	0.0122928	0.376902
YOL134C	1.88291	0.00660959	0.0128299	0.249449
YJL219W	1.59863	0.00663573	0.0128685	0.765952
YPL230W	1.20476	0.00681222	0.0131158	2.87355
YGR053C	1.44528	0.00682463	0.0131315	3.04927
YBR117C	1.3461	0.00687878	0.0132233	1.22326
YPR184W	1.51213	0.00695134	0.0133295	5.82141
YPL261C	2.5216	0.00709852	0.0135611	-0.351005
YMR085W	1.20161	0.00731889	0.0139045	3.52967
YLR157C-B	1.41514	0.00737917	0.0140015	2.1781
YPR200C	1.14075	0.00768805	0.0144809	2.43996
YJR109C	1.68482	0.00782384	0.0146918	11.237
YKL221W	2.16843	0.00803451	0.0150324	0.562864
YLR031W	2.14942	0.00805108	0.0150588	0.208704
YER069W	1.56887	0.0082054	0.0152918	10.5952
YKL071W	1.55802	0.00851976	0.0157964	1.16402
YKL147C	2.07767	0.00853198	0.0158096	0.921187
YBR145W	1.66072	0.00853751	0.0158103	8.98573
YNL034W	1.61845	0.00857336	0.0158672	0.343029
YNR034W-A	1.44144	0.00858207	0.0158737	2.84152
YER142C	1.22696	0.0086181	0.015926	5.07642
YOR313C	1.13959	0.00862203	0.0159285	4.86627
RUF23	1.29313	0.0086558	0.0159718	1.1069
YOR177C	1.1729	0.00874635	0.0160907	2.44534
YLR377C	1.77451	0.00877159	0.0161323	1.40124
YEL011W	2.17017	0.00900529	0.0164981	5.91517
YPR036W-A	1.84589	0.00901965	0.0165195	11.483
YDR042C	1.51781	0.00905923	0.0165723	1.65706
YKL036C	1.20458	0.00918675	0.0167707	2.42582
YKL070W	2.66675	0.00921208	0.016807	-0.0220663
YDR316W-B	1.68413	0.00928939	0.016918	1.24617
YBR053C	1.28696	0.00958892	0.0173813	5.77165
YKL031W	1.89878	0.00970316	0.017542	1.32558
YML066C	3.01169	0.00975501	0.0176238	-0.243417
YMR101C	1.4611	0.0103307	0.0184973	0.601677
YLR258W	1.29599	0.010348	0.0185231	6.72994
YOL106W	1.68376	0.0104663	0.0187185	1.29036
YOL058W	1.44619	0.0108782	0.0193485	12.5816
YOR024W	2.3529	0.0109775	0.0195082	-0.468698
YCL001W-A	2.66558	0.0110169	0.0195613	-0.501834
YGL007C-A	1.25373	0.0112062	0.0198574	1.47915
YDR258C	1.41194	0.0112621	0.0199277	7.75093
YNR002C	1.97457	0.0116922	0.0205589	2.02906
YCL054W-A	2.05067	0.0118409	0.0207611	-0.293796
YHL046C	2.96563	0.012035	0.0210596	-0.601873
YNL200C	1.316	0.0121136	0.021155	4.91397
YEL009C-A	1.96375	0.0121737	0.021254	0.30425
YOR055W	3.07446	0.0125466	0.0218493	-0.945699
YBR147W	1.91702	0.0128576	0.0223468	8.31612
YOR186W	1.90788	0.0128838	0.022381	1.10445
YGR236C	2.26169	0.0130725	0.0226499	0.42052
YNL274C	1.6463	0.0130912	0.022676	6.14785
YGL170C	1.53687	0.0132247	0.0228751	0.444164
YBR230C	1.14726	0.0136402	0.0235015	6.256
YCL001W-B	2.35289	0.0137019	0.0235944	0.0884099
YLR299C-A	2.3506	0.0139958	0.0240535	0.225585
RME2	1.22468	0.0140361	0.0240825	1.32654
YBR214W	1.75276	0.0143367	0.02453	5.76551
YCL026C-A	1.40905	0.0144784	0.0247175	3.00927
YGR248W	2.91416	0.0152405	0.0258272	3.52332
YAL016C-A	2.86056	0.0153912	0.0260093	-0.351897
YDL227C	1.60063	0.0158906	0.0267872	0.493836
YDR048C	2.83466	0.0160148	0.0269743	-0.118828
tL(UAG)L1	2.35676	0.0160859	0.0270498	0.087806
YMR251W	1.64506	0.0162408	0.0272805	2.51204
YOL160W	2.38938	0.0163214	0.0274009	0.518269
YML058W-A	1.2357	0.0164274	0.0275639	2.54047
YDR379C-A	1.35193	0.0174392	0.028979	3.67084
YAL063C-A	2.62478	0.0176563	0.029291	0.3003
YLR334C	2.78201	0.0176726	0.0293044	-0.410103
YKL037W	1.96396	0.0176999	0.0293159	0.745555
YAL047W-A	2.06632	0.0184746	0.0304273	0.148785
YFR054C	1.46521	0.0199192	0.0324425	1.33876
YMR250W	1.36925	0.0199712	0.0324927	5.42271
YML007C-A	1.68909	0.0201893	0.0327956	0.477391
tW(CCA)P	2.01054	0.0203487	0.0330025	0.339986
YLR338W	1.89682	0.0216975	0.0349326	0.152833
YGL182C	2.66486	0.0227417	0.0362443	-0.503196
YOR105W	1.77723	0.0242787	0.038226	0.681084
tG(GCC)D2	1.6323	0.0243765	0.0383601	0.658354
YFR017C	1.42654	0.0251187	0.039281	3.16617
YPL248C	1.2245	0.0257099	0.0399823	2.4183
YMR084W	1.19496	0.0264918	0.0410223	2.09936
YOR302W	1.37928	0.0268875	0.0415516	4.43155
YMR105C	1.25844	0.0306333	0.0464665	5.91038

## Sheet: deseq2_common_down_1210
targetID	baseMean	log2FoldChange	lfcSE	pvalue	padj
YKL054C	3825.52	-1.1524	0.179714	0	3.69e-10
YLR378C	5477.44	-1.18502	0.180086	0	1.13e-10
YBR196C	21025.6	-1.18616	0.177095	0	0
YGR229C	4021.35	-1.21973	0.187136	0	1.64e-10
YAR002C-A	2767.85	-1.22604	0.179052	0	0
YDR212W	3121.95	-1.23598	0.179504	0	0
YOR239W	2826.18	-1.23681	0.176186	0	0
YPR113W	2833.7	-1.23722	0.189186	0	1.4e-10
YBL085W	1587.4	-1.2496	0.195899	0	3.82e-10
YBR121C	7119.56	-1.25636	0.19703	0	3.54e-10
YPL057C	1687.2	-1.25896	0.182891	0	0
YDL055C	23122.3	-1.26324	0.194558	0	2.11e-10
YDR226W	9520.29	-1.2659	0.187952	0	0
YER125W	3587.19	-1.26789	0.1807	0	0
YDR334W	1745.92	-1.26936	0.181992	0	0
YBR106W	9043.75	-1.27681	0.177891	0	0
YNL197C	1600.15	-1.2806	0.194078	0	0
YOR217W	1541.15	-1.28513	0.187888	0	0
YCR024C-A	3753.73	-1.2882	0.185311	0	0
YLR130C	3264.86	-1.2915	0.184818	0	0
YMR129W	2030.91	-1.29272	0.19767	0	1.37e-10
YMR076C	856.235	-1.30561	0.199273	0	1.21e-10
YCR008W	1867.08	-1.3075	0.20248	0	2.19e-10
YJR118C	1105.64	-1.31088	0.199019	0	0
YOL143C	4311.88	-1.31091	0.206053	0	3.97e-10
YGR240C	17524.2	-1.315	0.170434	0	0
YJL111W	4250.51	-1.31648	0.178265	0	0
YDR002W	7087.71	-1.31794	0.198699	0	0
YML055W	831.416	-1.31946	0.195485	0	0
YHR103W	1211.04	-1.3274	0.197637	0	0
YAL007C	2012.87	-1.33663	0.198069	0	0
YLR347C	2286.67	-1.34663	0.2044	0	0
YMR205C	12571.9	-1.3527	0.189322	0	0
YPR114W	1631.76	-1.35346	0.203486	0	0
YHR005C-A	2788.56	-1.35374	0.182993	0	0
YEL022W	1610.58	-1.355	0.189524	0	0
YPR133W-A	1782.06	-1.36019	0.182231	0	0
YBR042C	809.427	-1.36126	0.205678	0	0
YJL183W	2088.79	-1.36375	0.198753	0	0
YBR220C	1013.7	-1.36711	0.190405	0	0
YKL120W	6818.04	-1.36803	0.181709	0	0
YOR232W	2742.91	-1.3684	0.181103	0	0
YBR283C	6686.76	-1.36977	0.172529	0	0
YGL068W	1409.33	-1.37796	0.184906	0	0
YGL092W	2436.02	-1.37996	0.216891	0	3.71e-10
YPL094C	2332.5	-1.38176	0.196583	0	0
YLL031C	1617.57	-1.38368	0.190649	0	0
YDR062W	3616.29	-1.39063	0.182747	0	0
YHR031C	697.743	-1.39408	0.219034	0	3.61e-10
YMR307W	23149.2	-1.39414	0.180282	0	0
YJL101C	2172.34	-1.39696	0.211297	0	0
YPL082C	1638.41	-1.39749	0.216954	0	2.2e-10
YDR331W	1024.99	-1.4031	0.19314	0	0
YFL045C	7012.52	-1.40312	0.176772	0	0
YBR078W	18307.6	-1.40587	0.186005	0	0
YNL166C	1216.23	-1.40835	0.196091	0	0
YPL063W	2752.7	-1.41269	0.177622	0	0
YLR216C	3041.55	-1.41445	0.199684	0	0
YML115C	1605.28	-1.41591	0.200348	0	0
YER122C	3353.3	-1.41944	0.195965	0	0
YBR243C	1137.13	-1.42327	0.217202	0	1.04e-10
YDR245W	3052.73	-1.42572	0.189657	0	0
YGR063C	767.706	-1.42673	0.20884	0	0
YLR455W	818.389	-1.43039	0.212892	0	0
YOR210W	1615.18	-1.43293	0.223533	0	2.51e-10
YOR140W	1181.23	-1.43502	0.199135	0	0
YBR087W	661.978	-1.43863	0.209768	0	0
YHL017W	886.231	-1.44076	0.21594	0	0
YOR254C	4004.79	-1.44119	0.200349	0	0
YMR296C	2863.88	-1.44277	0.184915	0	0
YER145C	3137.69	-1.44333	0.196134	0	0
YPL160W	7665.92	-1.44792	0.211294	0	0
YPL050C	3204.95	-1.4497	0.180351	0	0
YHR107C	1431.02	-1.45129	0.193663	0	0
YDR093W	1992.39	-1.45337	0.185895	0	0
YOR128C	4148.99	-1.45845	0.213542	0	0
YLR262C-A	2647.77	-1.46357	0.206447	0	0
YDL095W	4971.56	-1.46612	0.182373	0	0
YLR083C	4411.7	-1.46654	0.213423	0	0
YLR355C	35060.1	-1.46672	0.176569	0	0
YOL014W	415.965	-1.4688	0.224955	0	1.18e-10
YMR070W	1316.12	-1.46905	0.210575	0	0
YIL027C	795.139	-1.47863	0.195476	0	0
YHR204W	1281.21	-1.48023	0.205614	0	0
YMR246W	5268.34	-1.48339	0.218967	0	0
YMR012W	5170.57	-1.4879	0.196191	0	0
YDL043C	494.732	-1.49354	0.23224	0	2.13e-10
YMR078C	683.426	-1.50069	0.211872	0	0
YMR212C	1674.02	-1.50266	0.227416	0	0
YOL020W	2424.93	-1.50406	0.203105	0	0
YGL226C-A	1065.68	-1.5058	0.191878	0	0
YJL115W	1179.26	-1.50779	0.217759	0	0
YOR133W	9969.49	-1.51273	0.194992	0	0
YHR154W	739.325	-1.51306	0.224269	0	0
YLR244C	3740.04	-1.5137	0.217438	0	0
YML065W	1026.96	-1.5138	0.213419	0	0
YDR180W	489.506	-1.51959	0.235718	0	1.88e-10
YML106W	4393.79	-1.51984	0.211279	0	0
YKL113C	1254.03	-1.52013	0.206127	0	0
YDR172W	5750.4	-1.52215	0.193544	0	0
YMR292W	774.165	-1.52288	0.221425	0	0
YDL049C	678.276	-1.52831	0.217663	0	0
snR86	811.084	-1.52886	0.219829	0	0
YOL103W	2209.46	-1.53718	0.187924	0	0
YJL134W	1209.05	-1.54633	0.209248	0	0
YER002W	2595.8	-1.5501	0.245731	0	4.3e-10
YEL036C	2775.51	-1.55033	0.190538	0	0
YOR276W	2452.74	-1.55961	0.17934	0	0
YBR192W	692.676	-1.56567	0.211789	0	0
YNL181W	699.89	-1.56638	0.226968	0	0
YNL016W	3950.39	-1.56742	0.178878	0	0
YKL166C	598.443	-1.56896	0.225155	0	0
YER156C	2717.83	-1.57011	0.247314	0	3.35e-10
YDR156W	622.601	-1.57197	0.216985	0	0
YPR124W	766.939	-1.57504	0.200371	0	0
YMR043W	1513.83	-1.5787	0.197822	0	0
YML080W	694.886	-1.57871	0.228469	0	0
YDL122W	2245.01	-1.5797	0.219782	0	0
YMR277W	1647.93	-1.58005	0.245261	0	1.82e-10
YDR224C	13542.1	-1.58194	0.226652	0	0
YPL237W	5596.43	-1.5827	0.21814	0	0
YMR127C	389.481	-1.58443	0.236732	0	0
YDR359C	1001.03	-1.58823	0.229933	0	0
YPR141C	540.304	-1.59516	0.251443	0	3.35e-10
YMR186W	26596	-1.59961	0.200761	0	0
YHR142W	1180.74	-1.60048	0.203624	0	0
YDR454C	2901.54	-1.60727	0.211627	0	0
YJL080C	5109.52	-1.61528	0.199923	0	0
YDR121W	516.21	-1.61784	0.245532	0	0
YLR405W	720.577	-1.62148	0.234965	0	0
YJL034W	10343.4	-1.62522	0.219719	0	0
YGR260W	2532.44	-1.62556	0.195695	0	0
YDL033C	329.893	-1.62615	0.234995	0	0
YER091C	57975.3	-1.62787	0.208361	0	0
YNL252C	589.781	-1.62858	0.21634	0	0
YHR149C	1009.81	-1.63005	0.211423	0	0
YGL253W	15255.9	-1.63091	0.200011	0	0
YOR046C	2141.84	-1.63107	0.22603	0	0
YKL096W	1343.04	-1.63613	0.239822	0	0
YLR297W	311.635	-1.64883	0.255634	0	1.64e-10
YLR293C	9664.48	-1.64953	0.195594	0	0
YGR187C	1647.54	-1.66232	0.244561	0	0
YHR068W	3119.18	-1.66346	0.205567	0	0
YDL157C	612.186	-1.67212	0.245235	0	0
YPR119W	947.939	-1.67507	0.255581	0	0
YGR208W	1860.37	-1.67556	0.252537	0	0
YGL162W	243.152	-1.67631	0.250343	0	0
YML064C	459.185	-1.67995	0.22024	0	0
YJR067C	278.867	-1.68293	0.245351	0	0
YPL246C	1767.49	-1.68972	0.212277	0	0
YEL003W	1137.46	-1.69243	0.205859	0	0
YGR083C	1866.88	-1.69392	0.231065	0	0
YBR017C	2053.35	-1.69496	0.226232	0	0
YEL017C-A	4368.34	-1.69758	0.200561	0	0
YKR090W	678.304	-1.69823	0.256213	0	0
YPL075W	2527.23	-1.70104	0.187116	0	0
YPR187W	3118.32	-1.70299	0.243977	0	0
YOR188W	896.111	-1.70532	0.242775	0	0
YNR016C	9010.12	-1.70715	0.252668	0	0
YDR515W	423.944	-1.71673	0.218868	0	0
YJL212C	2468.24	-1.72126	0.269145	0	2.12e-10
YML053C	515.026	-1.7236	0.216075	0	0
YNL246W	1209.36	-1.72701	0.229743	0	0
YGR140W	743.478	-1.73415	0.212554	0	0
YJR143C	4218.41	-1.74014	0.174927	0	0
YJR101W	751.657	-1.7413	0.215675	0	0
YAL035W	6749.21	-1.74438	0.223566	0	0
YDR152W	1614.85	-1.74821	0.232262	0	0
YMR079W	1870.6	-1.7483	0.202702	0	0
YML123C	12984.4	-1.75157	0.194005	0	0
YKL183W	723.29	-1.75524	0.21895	0	0
YOR051C	2289.08	-1.75831	0.237524	0	0
YPR016C	3703.03	-1.75973	0.23161	0	0
YLR060W	5649.18	-1.76228	0.214968	0	0
YKL021C	1376.08	-1.76366	0.266013	0	0
YJL069C	1838.78	-1.7714	0.265576	0	0
YDL164C	844.325	-1.77359	0.211801	0	0
YDR321W	1557.68	-1.7741	0.261943	0	0
YML060W	383.799	-1.7794	0.234742	0	0
YMR117C	279.524	-1.78201	0.2737	0	0
YMR259C	1260.32	-1.79835	0.286024	0	3.88e-10
YHR208W	16097.8	-1.80236	0.211486	0	0
YIL053W	31843.6	-1.80316	0.195889	0	0
YLR056W	4745.55	-1.80562	0.210188	0	0
YCL031C	1696.66	-1.80627	0.196016	0	0
YBR171W	1300.82	-1.80717	0.188456	0	0
YCL002C	705.356	-1.80928	0.229107	0	0
YNL068C	1062.76	-1.80962	0.211307	0	0
YGR021W	453.939	-1.8141	0.221612	0	0
YOR372C	928.365	-1.81448	0.247513	0	0
YDR281C	308.785	-1.81556	0.282472	0	1.6e-10
YNL064C	8914.07	-1.81877	0.244072	0	0
YPR065W	2912.17	-1.8215	0.228208	0	0
YER118C	1336.85	-1.82613	0.190053	0	0
YJL124C	1628.59	-1.82649	0.207351	0	0
YNL313C	2036.32	-1.83028	0.284998	0	1.62e-10
YGL008C	87391.2	-1.83076	0.185406	0	0
YPR163C	7599.22	-1.84145	0.239081	0	0
YLR172C	1681.54	-1.84388	0.247741	0	0
YNR017W	2761.07	-1.84735	0.192675	0	0
YHR215W	1064.33	-1.85059	0.202328	0	0
YNL207W	1114.44	-1.85272	0.267051	0	0
YDL205C	1452.12	-1.85814	0.226021	0	0
YMR308C	3425.75	-1.86551	0.247863	0	0
YBL069W	483.593	-1.86621	0.221326	0	0
YDR412W	1352.6	-1.87842	0.275712	0	0
YNL065W	2081.64	-1.88319	0.234514	0	0
YBR030W	822.773	-1.89827	0.226568	0	0
YLR008C	1133.48	-1.90019	0.200118	0	0
YML018C	2812.59	-1.90389	0.290182	0	0
YNR029C	702.532	-1.90647	0.232202	0	0
YBR161W	450.796	-1.9082	0.245063	0	0
YHR033W	271.862	-1.90867	0.299254	0	2.01e-10
YBR238C	1181.22	-1.91011	0.248474	0	0
YDR207C	615.721	-1.91766	0.25523	0	0
YDL213C	1402.09	-1.91779	0.299337	0	1.65e-10
YHR069C	1016.5	-1.93096	0.30444	0	2.44e-10
YDL112W	1726.14	-1.93696	0.310858	0	4.82e-10
YBR143C	6620.01	-1.9397	0.192937	0	0
YGR158C	859.025	-1.94006	0.27882	0	0
YPR110C	3401.32	-1.94097	0.295128	0	0
YKL027W	1076.34	-1.94297	0.234008	0	0
YOR355W	2631.15	-1.94729	0.204204	0	0
YMR243C	4119.88	-1.94781	0.205929	0	0
YKL014C	2241.06	-1.94816	0.295484	0	0
YDL031W	2599.38	-1.94862	0.300414	0	0
YGL225W	4639.08	-1.95106	0.189372	0	0
YBR118W	48939	-1.95139	0.215083	0	0
YCL024W	479.841	-1.95316	0.283756	0	0
YHR081W	867.527	-1.95341	0.29656	0	0
YLR359W	10349.5	-1.9566	0.271947	0	0
YNL255C	5935.07	-1.95769	0.253298	0	0
YGR142W	714.096	-1.95822	0.290997	0	0
YDR190C	2585.1	-1.96044	0.203201	0	0
YHR193C	8845.56	-1.96186	0.18239	0	0
YGR285C	7635.08	-1.96517	0.22675	0	0
YJL025W	390.074	-1.98684	0.286379	0	0
YNR015W	851.237	-1.99325	0.268789	0	0
snR30	208.248	-1.99349	0.312644	0	1.91e-10
YOR091W	1857.65	-1.99852	0.288718	0	0
YPL227C	1136.71	-2.00324	0.205807	0	0
YPL032C	2083.19	-2.01598	0.195882	0	0
YGR095C	836.703	-2.01799	0.262196	0	0
YOR006C	807.942	-2.02603	0.267009	0	0
YLR003C	825.632	-2.02605	0.313721	0	1.08e-10
YHL039W	1203.16	-2.04487	0.312257	0	0
YOR161C	1055.39	-2.04736	0.328931	0	4.59e-10
YJL198W	2491.09	-2.04929	0.300123	0	0
YDR045C	658.336	-2.05535	0.251851	0	0
YDR072C	1721.46	-2.05605	0.202028	0	0
YBL009W	645.17	-2.05744	0.241582	0	0
YLR017W	1354.15	-2.05783	0.249597	0	0
YPR080W	36728.6	-2.05796	0.256522	0	0
YJR056C	449.919	-2.06432	0.235561	0	0
YLR287C	806.227	-2.07109	0.23618	0	0
YER025W	4463.43	-2.07145	0.238731	0	0
YHR088W	1271.12	-2.07737	0.323471	0	1.31e-10
YML125C	3102.48	-2.0779	0.256545	0	0
YDL003W	1396.66	-2.08	0.281145	0	0
YMR146C	5563.13	-2.08067	0.211692	0	0
YAL023C	5612.42	-2.08397	0.183782	0	0
YGR079W	1187.17	-2.08931	0.269147	0	0
YNL119W	980.532	-2.08951	0.293737	0	0
YJL138C	8062.79	-2.10379	0.222388	0	0
YKL156W	7380.87	-2.11196	0.240916	0	0
YOR116C	2609.22	-2.11301	0.27215	0	0
YPL086C	1425.28	-2.11665	0.327199	0	0
YBR068C	8156.39	-2.1371	0.210999	0	0
YBR034C	3276.15	-2.14039	0.255839	0	0
YHR062C	811.915	-2.14233	0.308778	0	0
YOL154W	2153.53	-2.15664	0.320011	0	0
YBR187W	3219.77	-2.1584	0.210261	0	0
YPL146C	2023.73	-2.1588	0.272417	0	0
YFL022C	3562.41	-2.16284	0.227585	0	0
YER043C	14422.9	-2.16486	0.228436	0	0
YBL031W	366.348	-2.16535	0.255076	0	0
YBR079C	6097.26	-2.17355	0.218474	0	0
YOR078W	1354.96	-2.178	0.26215	0	0
YDR161W	1280.28	-2.18416	0.312143	0	0
YFL002C	1092.74	-2.18861	0.28948	0	0
YOR315W	2573.15	-2.19532	0.249619	0	0
YPR137W	1961.62	-2.20013	0.252989	0	0
YDL048C	1204.06	-2.20369	0.203614	0	0
YFR001W	1256.22	-2.22307	0.249338	0	0
YDR234W	8455.22	-2.22317	0.214322	0	0
YLR180W	13703.4	-2.22498	0.252933	0	0
YDR021W	565.42	-2.2273	0.357066	0	3.69e-10
YLR249W	57335.9	-2.22975	0.275188	0	0
YKR047W	143.625	-2.23046	0.330676	0	0
YJR010W	6615.3	-2.24402	0.261236	0	0
YOR226C	1828.13	-2.25662	0.199992	0	0
YDR398W	3203.64	-2.25675	0.295756	0	0
YOR119C	1220.46	-2.25817	0.288152	0	0
YOR361C	4579.88	-2.2639	0.210989	0	0
YHR094C	14932.8	-2.26567	0.26768	0	0
YGR169C-A	1191.53	-2.26614	0.266094	0	0
YKR079C	982.44	-2.27287	0.333326	0	0
YOR108W	4001.29	-2.27413	0.214197	0	0
YKR080W	2348.11	-2.27661	0.307801	0	0
YEL034W	14197.6	-2.29079	0.206931	0	0
YER036C	7940.5	-2.29572	0.247627	0	0
YBR154C	2185.75	-2.29624	0.232048	0	0
YJL125C	1098.34	-2.29722	0.312792	0	0
YPL037C	6673.85	-2.31869	0.179536	0	0
YDR429C	4439.76	-2.32294	0.207015	0	0
YLL034C	1759.97	-2.32322	0.331679	0	0
YLL061W	874.662	-2.33341	0.354274	0	0
YDL241W	196.577	-2.33527	0.32453	0	0
YKL181W	4399.04	-2.34317	0.287731	0	0
YDR165W	1401.96	-2.3494	0.309241	0	0
YKL001C	7544.56	-2.35192	0.26377	0	0
YLL011W	1318.29	-2.35307	0.273354	0	0
YLR276C	2487.97	-2.35334	0.310815	0	0
YFR032C-B	194.828	-2.35468	0.330217	0	0
YHR049W	1899.44	-2.36155	0.194549	0	0
YNL186W	2804.76	-2.36396	0.26709	0	0
YHR085W	795.948	-2.36547	0.317119	0	0
YOR168W	4191.13	-2.36952	0.235297	0	0
YOL155C	5376.15	-2.37493	0.383318	0	4.22e-10
YML022W	1675.41	-2.38267	0.249684	0	0
YHR065C	1386.37	-2.38443	0.317337	0	0
YDR144C	1262.29	-2.38578	0.191388	0	0
YIL158W	882.505	-2.38832	0.212144	0	0
YJR124C	945.075	-2.39498	0.23994	0	0
YFL034C-A	3378.81	-2.39896	0.218209	0	0
YLL024C	27541.8	-2.40103	0.188371	0	0
YLR336C	1262.15	-2.40525	0.33665	0	0
YEL042W	2755.98	-2.41567	0.203022	0	0
YDR514C	637.635	-2.41853	0.234827	0	0
YGR254W	20642.2	-2.42232	0.277996	0	0
YBR141C	364.673	-2.42389	0.361386	0	0
YKR059W	6438.09	-2.42945	0.221215	0	0
YDR384C	3006.01	-2.43191	0.263286	0	0
YPL245W	564.514	-2.43205	0.243783	0	0
YPR143W	1516.1	-2.43261	0.276331	0	0
YER127W	1215.43	-2.43542	0.294732	0	0
YOR224C	2273.46	-2.43554	0.265642	0	0
YDR399W	5978.86	-2.44115	0.277575	0	0
YIL131C	625.495	-2.44495	0.272444	0	0
YDR047W	1515.83	-2.44605	0.212553	0	0
YNL244C	5299.78	-2.44618	0.217566	0	0
YKL172W	3718.64	-2.44992	0.281055	0	0
YKR024C	1083.29	-2.45382	0.322157	0	0
YPL183C	1883.15	-2.47067	0.298051	0	0
YGR173W	1011.28	-2.4814	0.284491	0	0
YHR072W-A	2680.62	-2.48618	0.254265	0	0
YGR192C	215224	-2.48833	0.20299	0	0
YML082W	1168.46	-2.48852	0.264655	0	0
YOL052C	1102.9	-2.48946	0.255503	0	0
YGL055W	5940.56	-2.49477	0.196855	0	0
YDR046C	4061.77	-2.50466	0.232198	0	0
YMR309C	4342.47	-2.50552	0.213676	0	0
YBR172C	2185.53	-2.50754	0.227886	0	0
YER137C	186.424	-2.52106	0.387229	0	0
YDR233C	6937.95	-2.5285	0.179168	0	0
YHR128W	2412.03	-2.53417	0.254221	0	0
YOR004W	1143.84	-2.53467	0.351819	0	0
YPL266W	1098.43	-2.53906	0.341293	0	0
YBR029C	1719.64	-2.54545	0.261844	0	0
YKL109W	2309.85	-2.54561	0.18309	0	0
YGR200C	2082.88	-2.55181	0.315519	0	0
YIL091C	1761.84	-2.5522	0.341761	0	0
YEL055C	2082.93	-2.5544	0.272208	0	0
YNL292W	737.828	-2.55944	0.237039	0	0
YLR106C	3047.9	-2.56123	0.333413	0	0
YFL001W	671.581	-2.5634	0.289377	0	0
YKL060C	132206	-2.56898	0.183515	0	0
YPL126W	2911.24	-2.57646	0.338786	0	0
YGR271C-A	831.146	-2.58011	0.255281	0	0
YFL023W	1059.08	-2.58745	0.32021	0	0
YER082C	1479.98	-2.59543	0.335575	0	0
YER110C	3641.5	-2.59946	0.379668	0	0
YKL099C	945.39	-2.60365	0.283817	0	0
YCR016W	1144.59	-2.60513	0.287401	0	0
YKL082C	2797.68	-2.60641	0.260773	0	0
YLR058C	18599	-2.61643	0.310247	0	0
YJR063W	900.332	-2.6194	0.361393	0	0
YNL075W	1264.1	-2.63519	0.287626	0	0
YJL010C	1053.67	-2.63636	0.326352	0	0
YBL081W	1217.24	-2.64163	0.228509	0	0
YKL068W-A	1025.22	-2.64874	0.300098	0	0
YHR183W	17972.5	-2.6511	0.196412	0	0
YJL200C	12523.8	-2.65134	0.249855	0	0
YBR088C	1242.92	-2.66596	0.236701	0	0
YMR093W	1328.22	-2.66616	0.284642	0	0
YPR041W	4159.69	-2.67191	0.237445	0	0
YLR221C	1580.22	-2.67586	0.300489	0	0
YOR359W	1185.78	-2.67963	0.298768	0	0
YOL080C	759.876	-2.68245	0.333259	0	0
YBL024W	2148.27	-2.68926	0.225192	0	0
YHR040W	669.454	-2.69351	0.335605	0	0
YLR068W	737.033	-2.69746	0.320476	0	0
YMR310C	842.173	-2.7071	0.287696	0	0
YOR056C	1692.61	-2.71685	0.307362	0	0
YDL051W	2517.28	-2.72714	0.29101	0	0
YDL201W	897.279	-2.7381	0.329661	0	0
YLR363W-A	411.118	-2.73828	0.331584	0	0
YNL301C	3313.69	-2.73864	0.215511	0	0
YDL150W	1494.33	-2.74199	0.273527	0	0
YJR002W	2463.26	-2.74667	0.291587	0	0
YHR216W	6056.42	-2.75238	0.264018	0	0
YGR245C	2969.68	-2.75884	0.349825	0	0
YHR148W	769.003	-2.76664	0.291463	0	0
YGR118W	15107.9	-2.77979	0.212157	0	0
YOL124C	1183.07	-2.79178	0.337671	0	0
YGL234W	11434.7	-2.79306	0.293148	0	0
YPL226W	7573.44	-2.8006	0.282286	0	0
YHL001W	5715.01	-2.80402	0.222199	0	0
YIL096C	389.603	-2.81293	0.408097	0	0
YHR196W	2169.08	-2.8174	0.297134	0	0
YAL036C	1714.26	-2.82947	0.334622	0	0
YGL111W	1572.02	-2.83011	0.308404	0	0
YDR050C	48670.9	-2.83282	0.197615	0	0
YOR073W	484.827	-2.83906	0.311436	0	0
YGL009C	18823.5	-2.84462	0.188961	0	0
YOL010W	1092.44	-2.84751	0.333297	0	0
YLR344W	8529.42	-2.85126	0.264366	0	0
YMR260C	4772.5	-2.85816	0.234942	0	0
YOR344C	1668.89	-2.87496	0.193527	0	0
YEL033W	299.54	-2.88153	0.316136	0	0
YCL059C	1718.75	-2.88215	0.341604	0	0
YLR183C	761.209	-2.88515	0.280856	0	0
YDR222W	314.655	-2.89145	0.252118	0	0
YGR128C	1648.32	-2.90912	0.353375	0	0
YNL209W	18890.5	-2.90981	0.26141	0	0
YJR072C	1432.23	-2.91545	0.283795	0	0
YOL041C	2479.39	-2.92557	0.284035	0	0
YMR215W	2367.81	-2.93178	0.352554	0	0
YGL102C	179.556	-2.94846	0.379385	0	0
YML113W	642.189	-2.96823	0.275747	0	0
YDR417C	94.9334	-2.98174	0.390058	0	0
YLR287C-A	11443.9	-2.98236	0.199278	0	0
YAL003W	16040.6	-2.98508	0.200109	0	0
YGL188C-A	255.979	-2.98775	0.341944	0	0
YLR076C	86.3305	-2.99917	0.425295	0	0
YDR091C	2780.66	-3.00368	0.255754	0	0
YJR147W	740.413	-3.00619	0.250474	0	0
YOR101W	1863.72	-3.00742	0.301982	0	0
YJL011C	313.879	-3.02546	0.270851	0	0
YOL144W	830.367	-3.02638	0.340076	0	0
YJL191W	2722.64	-3.02997	0.255521	0	0
YJL109C	3702.35	-3.0448	0.340751	0	0
YLR075W	33624.2	-3.0496	0.230927	0	0
YER064C	899.76	-3.0548	0.255875	0	0
YBL028C	1339.38	-3.05626	0.299053	0	0
YDL208W	3680.16	-3.06147	0.272893	0	0
YPL043W	2756.11	-3.06617	0.333574	0	0
YMR120C	13369.8	-3.06831	0.328602	0	0
YGR162W	5700.14	-3.06892	0.247204	0	0
YNL096C	6711.19	-3.0894	0.233383	0	0
YPL012W	3908.89	-3.09573	0.365758	0	0
YGR090W	2392.83	-3.11112	0.266021	0	0
YNL110C	1911.21	-3.11352	0.274498	0	0
YMR131C	3941.71	-3.11482	0.315999	0	0
YBL004W	2115.86	-3.11791	0.405119	0	0
YCL054W	2986.01	-3.1195	0.298633	0	0
YBL029W	606.712	-3.12624	0.252537	0	0
YGR280C	2472.83	-3.12794	0.322366	0	0
snR84	134.959	-3.12918	0.372752	0	0
YOR294W	1723.57	-3.13059	0.33573	0	0
YER070W	5787.55	-3.13144	0.310934	0	0
YMR145C	4668.1	-3.13829	0.193606	0	0
YGR211W	2349.14	-3.13849	0.269903	0	0
YDR385W	14495.9	-3.15649	0.221322	0	0
YML043C	768.635	-3.15708	0.273999	0	0
YJL050W	2480.8	-3.16001	0.400278	0	0
YAL038W	86496.6	-3.16608	0.16979	0	0
YMR217W	7647.55	-3.167	0.344018	0	0
YLR063W	425.994	-3.16716	0.325867	0	0
YPR112C	2256.84	-3.16783	0.361237	0	0
YOL093W	801.014	-3.1753	0.265388	0	0
YLR449W	1896.24	-3.19389	0.304876	0	0
YOR206W	2628.2	-3.19661	0.28852	0	0
YER126C	2116.06	-3.22704	0.253972	0	0
YLR175W	7539.8	-3.22989	0.286414	0	0
YAL037C-B	402.649	-3.23601	0.242362	0	0
YIL019W	883.811	-3.23745	0.342771	0	0
YBR021W	357.587	-3.23913	0.386486	0	0
YIL169C	752.788	-3.25174	0.250119	0	0
YKL081W	14366	-3.25365	0.211913	0	0
YPL220W	8833.09	-3.25862	0.253478	0	0
YJL033W	2217.3	-3.26925	0.383876	0	0
YBR267W	1502.58	-3.28352	0.296748	0	0
YCL058W-A	229.724	-3.28372	0.36347	0	0
YBR142W	1602.67	-3.28704	0.352659	0	0
YHR170W	2748.72	-3.28843	0.339582	0	0
YOR342C	1628.59	-3.29068	0.243694	0	0
YPL263C	1570.26	-3.29099	0.277991	0	0
YOR167C	8256.68	-3.29747	0.211463	0	0
YDR033W	10038	-3.3249	0.269226	0	0
YGR027C	14916.1	-3.32677	0.209773	0	0
YEL026W	3794.68	-3.32899	0.270227	0	0
YBR291C	3254.13	-3.33505	0.223675	0	0
YPR149W	7686.33	-3.33622	0.432342	0	0
YNL002C	2734.15	-3.3523	0.282058	0	0
YNL067W	8991.61	-3.35852	0.182186	0	0
snR39	117.006	-3.39971	0.369676	0	0
YDL039C	1080.95	-3.40026	0.373125	0	0
YGL171W	1242.81	-3.4051	0.346248	0	0
YJL122W	1530.39	-3.4062	0.330212	0	0
YLR441C	21646.3	-3.41803	0.245624	0	0
YDR449C	1019.51	-3.42307	0.33109	0	0
YPR044C	122.264	-3.44484	0.431372	0	0
YLR002C	1262.17	-3.45062	0.360799	0	0
YGR085C	8167.19	-3.47777	0.24599	0	0
YCR072C	1032.81	-3.4846	0.321188	0	0
YLR074C	2349.18	-3.48793	0.305986	0	0
YKL153W	301.783	-3.48886	0.293648	0	0
YDR299W	1593.49	-3.49008	0.302857	0	0
YMR229C	3908.8	-3.49637	0.363839	0	0
YNL141W	1349.36	-3.49895	0.450482	0	0
snR49	185.794	-3.50439	0.332081	0	0
snR44	312.448	-3.50806	0.268439	0	0
YLR186W	1418.37	-3.50876	0.279677	0	0
YHR066W	1517.33	-3.50987	0.279521	0	0
YDR087C	1096.43	-3.51359	0.317882	0	0
YDL060W	2161.91	-3.51922	0.374812	0	0
YDR508C	6735.34	-3.53948	0.179704	0	0
YNR054C	685.841	-3.54546	0.269246	0	0
YHR174W	122849	-3.5479	0.180109	0	0
YLR197W	7110.68	-3.55326	0.308726	0	0
YHR197W	1148.35	-3.55419	0.428615	0	0
YLR196W	2962.3	-3.56113	0.312818	0	0
YLR333C	5606.78	-3.56133	0.264422	0	0
YHR052W	2032.66	-3.56863	0.268407	0	0
YDL063C	1440.54	-3.56922	0.409594	0	0
YNL151C	1104.52	-3.57948	0.302207	0	0
YHR169W	1019.37	-3.59863	0.370411	0	0
YKL216W	9593.21	-3.60014	0.2414	0	0
YGR283C	575.265	-3.60435	0.295672	0	0
YDR060W	3804.56	-3.60976	0.307782	0	0
YLR367W	3235.7	-3.61	0.226298	0	0
YMR194W	6141.99	-3.61092	0.209784	0	0
YGL123C-A	115.523	-3.61103	0.374022	0	0
YNL182C	1188.77	-3.61547	0.321963	0	0
YOR234C	5506.05	-3.61576	0.224388	0	0
YLR129W	2438.52	-3.61691	0.33665	0	0
YCR013C	199.435	-3.61715	0.326363	0	0
YPL079W	10094.4	-3.62401	0.225423	0	0
YIL094C	19215.3	-3.62429	0.205152	0	0
YOR310C	3674.72	-3.62818	0.237319	0	0
YLR340W	20265.5	-3.63165	0.226367	0	0
YMR011W	3730.74	-3.63289	0.419693	0	0
YCR034W	2831.64	-3.63556	0.226349	0	0
YGR123C	1104.03	-3.63621	0.309693	0	0
YBL027W	21812.3	-3.63706	0.251627	0	0
YCR012W	62731.3	-3.63958	0.214249	0	0
YDR324C	2212.64	-3.65286	0.314869	0	0
YBR084C-A	16072	-3.66536	0.249677	0	0
YER006W	2644.19	-3.66803	0.33063	0	0
YDR465C	1744.54	-3.68335	0.362721	0	0
YMR142C	17706.6	-3.68383	0.250687	0	0
YGL029W	1092.47	-3.6864	0.351107	0	0
YLR372W	5702.78	-3.68801	0.194597	0	0
YKR081C	1845.16	-3.69763	0.341362	0	0
YOR272W	1585.87	-3.70223	0.372649	0	0
YBL054W	1167.54	-3.70473	0.368826	0	0
YJR070C	3276.86	-3.71403	0.289184	0	0
YLR222C	1736.47	-3.71439	0.342934	0	0
YDL014W	7064.03	-3.72371	0.281983	0	0
YDR418W	13640.7	-3.73002	0.205613	0	0
YDR496C	2498.46	-3.74062	0.325906	0	0
YAL059W	1011.23	-3.76262	0.339781	0	0
YML024W	11774.7	-3.7745	0.208146	0	0
YGR145W	1723.83	-3.77481	0.386006	0	0
YDL136W	6335.27	-3.78129	0.228114	0	0
YHR203C	13601.6	-3.78368	0.254795	0	0
YIL127C	854.524	-3.78566	0.378823	0	0
YDR500C	9969.62	-3.78722	0.23389	0	0
YNL175C	1927.48	-3.79294	0.306706	0	0
YNL061W	2730.19	-3.81135	0.283506	0	0
YPR132W	15135.8	-3.81257	0.237679	0	0
snR63	156.676	-3.81501	0.395793	0	0
YDR083W	1242.95	-3.8176	0.336156	0	0
YGR109C	164.253	-3.8222	0.395475	0	0
YDL191W	4106.36	-3.82684	0.225551	0	0
YMR128W	1811.45	-3.83019	0.370406	0	0
YOL077C	2109	-3.84768	0.325666	0	0
YNL162W	10606.6	-3.86051	0.243196	0	0
YBR181C	12490.6	-3.86948	0.265332	0	0
YOR312C	13182.4	-3.87477	0.233329	0	0
YKR094C	10674.4	-3.87871	0.22864	0	0
YOR341W	4809.43	-3.88207	0.364206	0	0
YPL143W	12757.3	-3.90852	0.224317	0	0
YIL148W	12009.4	-3.91298	0.22468	0	0
YOL086C	86882.3	-3.91502	0.213145	0	0
YIL103W	600.875	-3.92483	0.332669	0	0
YKL009W	3001.23	-3.92725	0.319017	0	0
YGR148C	11931.9	-3.93138	0.231259	0	0
YGL120C	2649.67	-3.93301	0.348289	0	0
YGL135W	14307.6	-3.93505	0.253769	0	0
YJL136C	10925.2	-3.93932	0.245384	0	0
YDL133C-A	10702.6	-3.94107	0.211563	0	0
YOR182C	4075.29	-3.94524	0.258647	0	0
YML073C	8885.53	-3.94593	0.180163	0	0
YNL132W	1981.13	-3.96342	0.377911	0	0
YIL064W	519.307	-3.96918	0.364802	0	0
YPL211W	1280.29	-3.98202	0.384841	0	0
YJL148W	2262.89	-4.02007	0.310898	0	0
YPR010C	6473.31	-4.02138	0.344521	0	0
YDR101C	2284.1	-4.02522	0.319082	0	0
YER117W	13279	-4.03014	0.222706	0	0
YGR159C	12005.8	-4.06042	0.314359	0	0
YDR012W	9803.76	-4.06767	0.198519	0	0
YMR143W	13098.2	-4.07992	0.207725	0	0
YKL152C	67062.3	-4.09494	0.186726	0	0
YCR087C-A	534.265	-4.10059	0.346078	0	0
YMR049C	2283.17	-4.10117	0.336345	0	0
YDL229W	23312.1	-4.10489	0.2511	0	0
YBR031W	18270.6	-4.10925	0.206306	0	0
YBR048W	10468.2	-4.12434	0.230407	0	0
YLR009W	2594.1	-4.12448	0.299687	0	0
YDL061C	6119.68	-4.13799	0.234107	0	0
YHR141C	12655.1	-4.14583	0.206477	0	0
YPR043W	14231	-4.15569	0.227559	0	0
YHL033C	9451.81	-4.16301	0.227382	0	0
YKR057W	8223.29	-4.17141	0.229697	0	0
YGL103W	22906.6	-4.17376	0.24868	0	0
YDL037C	472.803	-4.17493	0.42144	0	0
YJL188C	107.037	-4.17549	0.45998	0	0
YBR069C	3657.97	-4.1778	0.239346	0	0
YML093W	2688.02	-4.18409	0.315218	0	0
YOL127W	18673.4	-4.18866	0.243944	0	0
YLR448W	6656.43	-4.1921	0.261503	0	0
YDR447C	9413.74	-4.22137	0.262239	0	0
YBR247C	1371.21	-4.23334	0.339352	0	0
YDR450W	13994.5	-4.23591	0.232928	0	0
YCR031C	16720.2	-4.23832	0.249515	0	0
YJL189W	7579.39	-4.23957	0.207828	0	0
YDR471W	8864.3	-4.24347	0.214552	0	0
YPL142C	49.5427	-4.26243	0.621989	0	0
YMR230W	7840.99	-4.27343	0.227145	0	0
YLR409C	2093.87	-4.27986	0.342425	0	0
YBR025C	7269.03	-4.28066	0.251825	0	0
YLR198C	107.954	-4.28245	0.552245	0	0
YDL075W	13859.8	-4.28581	0.230875	0	0
YDL228C	45.3921	-4.28928	0.624803	0	0
YDL148C	2137.47	-4.29693	0.379135	0	0
YGL076C	18579.5	-4.31245	0.217907	0	0
YIL133C	11676.5	-4.32823	0.247833	0	0
YLL008W	2553.17	-4.33616	0.340629	0	0
YKL078W	682.754	-4.33623	0.424105	0	0
YGL189C	18573.4	-4.33829	0.216961	0	0
YDL153C	2124.9	-4.33981	0.410243	0	0
YKL143W	1492.64	-4.34114	0.362892	0	0
YIL018W	25401.7	-4.34267	0.216608	0	0
YDL184C	24275.5	-4.35597	0.194466	0	0
YGR103W	4539.08	-4.36105	0.373234	0	0
YFR032C-A	3085.23	-4.36912	0.222468	0	0
YJR094W-A	7915.96	-4.3839	0.239386	0	0
YPL090C	15054.2	-4.38737	0.24091	0	0
YMR242C	12061.4	-4.3911	0.261391	0	0
YER074W	10772.2	-4.3928	0.238493	0	0
YBR092C	832.484	-4.39349	0.278858	0	0
YPL198W	5693.64	-4.39378	0.216827	0	0
YLR044C	127344	-4.40244	0.174886	0	0
YLR264W	4652.26	-4.41197	0.236167	0	0
YGL123W	31498.1	-4.42359	0.206568	0	0
YPL093W	5066.78	-4.42607	0.338603	0	0
YNL062C	1013.87	-4.42704	0.337389	0	0
YBL072C	12631.6	-4.43137	0.234726	0	0
YGL030W	15883.3	-4.448	0.265137	0	0
YDL081C	12526	-4.44842	0.20861	0	0
YDR184C	587.302	-4.44948	0.384336	0	0
YML056C	6321.88	-4.45462	0.302479	0	0
YOL121C	8060.93	-4.45858	0.248344	0	0
YAL025C	2743.43	-4.47989	0.352341	0	0
YDR025W	11004.9	-4.48162	0.212659	0	0
YNR050C	23254	-4.49699	0.204409	0	0
YLL044W	222.185	-4.49893	0.491863	0	0
YPL250W-A	251.062	-4.52435	0.338542	0	0
YOL120C	17407.2	-4.54774	0.196907	0	0
YLR325C	15301	-4.55122	0.231181	0	0
YBR084W	3236.34	-4.55342	0.324989	0	0
YNL302C	12501	-4.55578	0.213393	0	0
YLR388W	4588.14	-4.56224	0.214981	0	0
YPL081W	5412.2	-4.59103	0.350301	0	0
YLR029C	25201.2	-4.60571	0.225693	0	0
YKL180W	12882	-4.61092	0.243224	0	0
YIL069C	9128.23	-4.62334	0.237083	0	0
YJR123W	31527.5	-4.62668	0.226022	0	0
YNL248C	2182.59	-4.64163	0.351597	0	0
YGR214W	13398.1	-4.65353	0.275468	0	0
YLR432W	8682.16	-4.6549	0.239683	0	0
YOR369C	23114	-4.65518	0.245224	0	0
YER056C-A	7475.72	-4.67148	0.259254	0	0
YLR150W	18122.4	-4.67198	0.222971	0	0
YLR073C	719.375	-4.68506	0.360846	0	0
YHR089C	4151.03	-4.69057	0.284615	0	0
YFR031C-A	16505.8	-4.70466	0.230542	0	0
YBR296C	1643.91	-4.70776	0.35389	0	0
YLR185W	6340.14	-4.71911	0.198642	0	0
YDR064W	15560.6	-4.71979	0.227677	0	0
YLR401C	1507.68	-4.73324	0.371483	0	0
YOR063W	48788.4	-4.74926	0.197949	0	0
YHR021C	6786.75	-4.75305	0.213862	0	0
YML026C	14720.7	-4.79473	0.239115	0	0
YLR048W	16782	-4.7966	0.260397	0	0
YHL015W	24820.5	-4.79925	0.232432	0	0
YER102W	8896.01	-4.81227	0.28234	0	0
YCR057C	2621.68	-4.83278	0.316309	0	0
YDL082W	9315.75	-4.8385	0.21627	0	0
YIL052C	9927.24	-4.83938	0.253267	0	0
YKL056C	16293.5	-4.85306	0.214607	0	0
YNR053C	4027.74	-4.87477	0.271072	0	0
YML063W	18423.5	-4.89708	0.262727	0	0
YGL078C	2925.77	-4.91488	0.359154	0	0
YDR382W	12891.1	-4.91845	0.249994	0	0
YPL249C-A	18039.4	-4.92313	0.206767	0	0
YLL045C	23906.2	-4.97294	0.250747	0	0
YOR293W	12136.5	-4.97934	0.242769	0	0
YOL040C	18585.5	-4.99419	0.212978	0	0
YLR061W	10728.9	-5.03052	0.246707	0	0
YKL006W	12218.4	-5.03062	0.248742	0	0
YBL087C	7376.73	-5.04325	0.24773	0	0
YDL130W	11952	-5.05128	0.238335	0	0
YBL092W	17891.3	-5.05758	0.238308	0	0
YOR096W	13521.3	-5.07901	0.250667	0	0
YNL069C	17177.4	-5.10222	0.212267	0	0
YPR102C	9723.97	-5.11973	0.241649	0	0
YHR010W	11786.3	-5.16315	0.207782	0	0
YPL061W	9975.74	-5.21136	0.444342	0	0
YBR191W	7462.07	-5.29112	0.261044	0	0
YOR340C	1343.3	-5.29707	0.33783	0	0
YJR145C	19099.7	-5.30224	0.233597	0	0
YEL054C	12323.2	-5.30461	0.255221	0	0
YLR167W	39321.4	-5.35263	0.242418	0	0
YNL178W	20355.3	-5.35852	0.220237	0	0
YEL053W-A	53.9839	-5.37322	0.777576	0	0
YGR034W	11588.1	-5.43084	0.21845	0	0
YBR189W	21972.6	-5.44222	0.231562	0	0
YJR009C	44609.7	-5.45816	0.194816	0	0
YLR406C	8153.06	-5.48512	0.239594	0	0
YMR116C	23561.1	-5.49193	0.240561	0	0
YJL177W	9231.63	-5.52783	0.255385	0	0
YOL039W	10874.5	-5.56406	0.208267	0	0
YGL031C	12611.4	-5.60034	0.233351	0	0
YPL131W	26981.4	-5.61784	0.203359	0	0
YMR290C	2691.51	-5.67015	0.340393	0	0
YDL083C	12929.7	-5.71948	0.26586	0	0
YLR413W	4339.4	-5.83492	0.324676	0	0
YGR055W	5714.27	-5.85618	0.227523	0	0
YCL037C	86.5905	-5.86084	0.679874	0	0
YBL039C	2696.91	-5.8669	0.366787	0	0
YNL112W	7105.77	-5.95906	0.393121	0	0
YGL147C	10937.5	-5.99612	0.237476	0	0
YJL190C	12559.4	-6.10156	0.224959	0	0
YER131W	12596.7	-6.55498	0.234543	0	0
YOR095C	1194.19	-6.92288	0.390196	0	0
YCL036W	950.76	-7.10115	0.452181	0	0
YLR064W	1267.89	-1.24958	0.197347	1.05e-10	5.15e-10
YHL011C	2566.15	-1.91497	0.307831	1.06e-10	5.19e-10
YNL102W	1135.81	-1.24675	0.197146	1.1e-10	5.4e-10
YDR289C	624.259	-1.3271	0.210599	1.17e-10	5.72e-10
YOR204W	5312.95	-1.31364	0.208925	1.29e-10	6.27e-10
YMR179W	592.112	-1.38098	0.220012	1.3e-10	6.3e-10
YKR056W	1714.28	-1.79516	0.289304	1.32e-10	6.41e-10
YNL282W	409.653	-1.66901	0.269408	1.6e-10	7.75e-10
YPL217C	3214.62	-2.07331	0.337919	1.64e-10	7.91e-10
YPR104C	1305.55	-1.25705	0.200839	1.68e-10	8.1e-10
YDR492W	1768.33	-1.43231	0.230422	1.73e-10	8.32e-10
YBR002C	1229.36	-1.66795	0.269991	1.77e-10	8.54e-10
YML027W	933.874	-1.75958	0.28548	1.78e-10	8.57e-10
YLL018C-A	279.798	-2.04306	0.333754	1.8e-10	8.65e-10
YGR033C	1321.76	-1.22737	0.196478	1.85e-10	8.89e-10
YMR291W	1307.51	-1.41921	0.229029	2.06e-10	9.85e-10
YBL052C	1208.07	-1.21961	0.195763	2.1e-10	1e-09
YHL026C	316.873	-1.48346	0.240213	2.21e-10	1.05e-09
YHR163W	4244.69	-1.19083	0.191813	2.45e-10	1.16e-09
YIL021W	1772.52	-1.24443	0.200771	2.48e-10	1.18e-09
YCR044C	896.081	-1.35342	0.219182	2.55e-10	1.21e-09
YOR098C	2324.53	-1.44719	0.235065	2.58e-10	1.22e-09
YBR015C	3570.95	-1.10758	0.178274	2.62e-10	1.24e-09
YJR117W	2251.16	-1.11859	0.180185	2.69e-10	1.27e-09
YKL125W	924.923	-1.48973	0.242565	2.71e-10	1.28e-09
YDL167C	2070.66	-1.8864	0.310533	2.73e-10	1.29e-09
YNL024C	97.7482	-2.14733	0.355194	2.77e-10	1.3e-09
YPL019C	3944.39	-1.08406	0.174612	2.78e-10	1.3e-09
YJL186W	1993.65	-1.28147	0.20757	2.78e-10	1.3e-09
YBL032W	1944.58	-1.1453	0.185046	2.93e-10	1.37e-09
YIR026C	878.477	-2.35047	0.391758	2.95e-10	1.38e-09
YKR082W	1519.08	-1.46683	0.239333	3e-10	1.4e-09
YNL121C	3831.93	-1.10735	0.178932	3.05e-10	1.42e-09
YBR205W	1218.02	-1.16262	0.188568	3.36e-10	1.56e-09
YNL273W	537.577	-1.31108	0.213547	3.38e-10	1.57e-09
YPL256C	1184.81	-1.53148	0.251663	3.68e-10	1.7e-09
YKL182W	10871	-1.56067	0.257192	3.74e-10	1.73e-09
YOR260W	2440.72	-1.54028	0.253381	3.79e-10	1.75e-09
YBR271W	896.861	-1.80269	0.298765	3.79e-10	1.75e-09
YJR007W	3194.51	-1.24613	0.203778	3.8e-10	1.75e-09
YHR147C	586.997	-1.26376	0.206285	3.85e-10	1.77e-09
YKL165C	1323.71	-1.17786	0.19196	3.99e-10	1.83e-09
YBR233W-A	349.644	-1.60832	0.265793	4.23e-10	1.94e-09
YHR119W	1203.66	-1.28541	0.210576	4.27e-10	1.96e-09
YKL006C-A	610.016	-1.33463	0.218976	4.27e-10	1.96e-09
YMR149W	2471.01	-1.12106	0.18283	4.33e-10	1.98e-09
YPL239W	1534.36	-1.76476	0.293361	4.4e-10	2.01e-09
YKL004W	2618.51	-1.60131	0.265137	4.54e-10	2.08e-09
YPL210C	2422.69	-1.24057	0.20332	4.57e-10	2.09e-09
YOL123W	3035.55	-1.1831	0.194658	4.64e-10	2.11e-09
YDL065C	1065.34	-1.18161	0.193727	4.96e-10	2.26e-09
YDR297W	1812.7	-1.40529	0.231988	5.01e-10	2.28e-09
YJL123C	2371.97	-1.27815	0.210263	5.09e-10	2.31e-09
YDR502C	11036.8	-1.86304	0.311656	5.4e-10	2.45e-09
YLR051C	1146.31	-1.527	0.253621	5.48e-10	2.48e-09
YNL097C	518.599	-1.29469	0.213569	5.53e-10	2.51e-09
YMR014W	1712.83	-1.77365	0.297083	5.78e-10	2.61e-09
YNL001W	909.56	-1.48095	0.246111	5.87e-10	2.65e-09
YNL113W	1823.06	-1.69514	0.283485	5.94e-10	2.68e-09
YOR045W	1225.81	-1.20473	0.198909	6.24e-10	2.82e-09
YPR125W	1401.22	-1.15145	0.190022	6.44e-10	2.91e-09
YHR127W	623.008	-1.33757	0.221984	6.61e-10	2.97e-09
YOL101C	124.722	-1.84404	0.310461	6.76e-10	3.04e-09
YER087C-B	1935.14	-1.09509	0.180638	6.88e-10	3.09e-09
YGL070C	785.146	-1.28601	0.213443	6.93e-10	3.11e-09
YDL143W	4713.37	-1.11651	0.184591	7.3e-10	3.27e-09
YIL149C	2165.88	-1.23498	0.20517	7.51e-10	3.36e-09
YPL163C	2348.09	-1.63337	0.275085	8.15e-10	3.63e-09
YGL200C	4248.54	-1.19977	0.199708	8.41e-10	3.74e-09
YDL232W	920.279	-1.1858	0.197249	8.52e-10	3.79e-09
YEL037C	3335.12	-1.0856	0.180152	8.58e-10	3.81e-09
YJL118W	279.988	-1.46293	0.245657	8.9e-10	3.95e-09
YHR084W	536.684	-1.36114	0.228337	9.55e-10	4.22e-09
YMR203W	3260.52	-1.10594	0.184213	9.75e-10	4.31e-09
YHL007C	2886.2	-1.34643	0.225948	9.78e-10	4.32e-09
YDL140C	4862.01	-1.10428	0.184069	1e-09	4.43e-09
YLR420W	3405.45	-1.42749	0.240419	1.01e-09	4.47e-09
YDR155C	3300.36	-1.43195	0.241486	1.07e-09	4.71e-09
YPR120C	461.01	-1.35658	0.228328	1.08e-09	4.76e-09
YOR021C	1775.81	-1.68735	0.287084	1.11e-09	4.86e-09
YNL147W	800.754	-1.36452	0.229984	1.13e-09	4.95e-09
YDR339C	927.414	-1.37839	0.232528	1.15e-09	5.01e-09
YJR076C	1951.19	-1.19806	0.201087	1.17e-09	5.09e-09
YMR015C	2793.11	-1.10648	0.185781	1.19e-09	5.22e-09
YML074C	4490.01	-1.12713	0.188904	1.2e-09	5.22e-09
YLL062C	299.09	-1.83827	0.315407	1.3e-09	5.65e-09
YKL051W	1350.73	-1.36304	0.230679	1.31e-09	5.69e-09
YMR006C	710.206	-1.44155	0.245296	1.46e-09	6.31e-09
YDL047W	2234.84	-1.17502	0.198343	1.48e-09	6.4e-09
YKR095W-A	420.689	-1.29032	0.218983	1.57e-09	6.79e-09
YLR103C	399.897	-1.36137	0.231871	1.65e-09	7.11e-09
YEL040W	11145.9	-1.34145	0.228636	1.72e-09	7.41e-09
YEL007W	1395.97	-1.53073	0.262589	1.75e-09	7.5e-09
YDR444W	788.542	-1.37417	0.234576	1.76e-09	7.55e-09
YOR145C	2993.72	-1.70233	0.293854	1.81e-09	7.77e-09
YGR210C	2013.77	-1.18713	0.201661	1.82e-09	7.79e-09
YGR098C	758.982	-1.44185	0.247043	1.86e-09	7.96e-09
YIR021W	463.459	-1.24995	0.213248	1.98e-09	8.45e-09
YDR302W	714.836	-1.17236	0.199653	2.03e-09	8.64e-09
YAR002W	1288.73	-1.25717	0.214776	2.05e-09	8.73e-09
YLR435W	951.022	-1.72621	0.29952	2.12e-09	9e-09
YER113C	1126.44	-1.25225	0.214147	2.14e-09	9.1e-09
YPL068C	266.991	-1.92692	0.336324	2.14e-09	9.1e-09
YLR364W	498.233	-1.83065	0.318769	2.16e-09	9.15e-09
YML109W	611.56	-1.19513	0.204284	2.24e-09	9.52e-09
YOR001W	1719.79	-1.71979	0.299668	2.43e-09	1.03e-08
YMR125W	2272.01	-1.22782	0.210855	2.49e-09	1.05e-08
YNL283C	1763.2	-1.23006	0.21139	2.61e-09	1.1e-08
YOR047C	1684.05	-1.11959	0.191999	2.74e-09	1.15e-08
snR33	266.397	-1.53027	0.265907	2.75e-09	1.16e-08
YKL029C	7588.59	-1.55508	0.2708	2.78e-09	1.17e-08
YBR067C	2195.38	-1.07652	0.184484	2.79e-09	1.17e-08
YMR003W	320.979	-1.60709	0.280177	2.84e-09	1.19e-08
YPL132W	429.364	-1.28001	0.220922	2.87e-09	1.21e-08
YPL240C	3284.83	-1.82036	0.31985	3.02e-09	1.26e-08
YDR073W	654.954	-1.16145	0.200229	3.12e-09	1.3e-08
YER032W	820.389	-1.27764	0.221983	3.58e-09	1.49e-08
YCR024C-B	5595.32	-1.18989	0.206143	3.6e-09	1.49e-08
YMR214W	1756.1	-1.17101	0.202965	3.7e-09	1.53e-08
YHR172W	456.28	-1.3643	0.237939	3.73e-09	1.54e-08
YLR243W	647.934	-1.44948	0.253859	3.89e-09	1.61e-08
YGR177C	271.629	-1.73507	0.306798	3.97e-09	1.64e-08
YDL182W	33727.4	-1.52028	0.26737	4.11e-09	1.7e-08
YOL007C	1446.23	-1.12697	0.195615	4.13e-09	1.7e-08
YLR062C	35.0609	-4.98747	0.883797	4.15e-09	1.71e-08
YHR077C	2128.36	-1.31392	0.229594	4.19e-09	1.72e-08
YLR354C	13793.2	-1.06903	0.185792	4.33e-09	1.78e-08
YER115C	696.397	-1.35459	0.237428	4.43e-09	1.82e-08
YHR098C	2150.91	-1.1452	0.199435	4.55e-09	1.86e-08
YER007C-A	1571.83	-1.25473	0.219324	4.55e-09	1.86e-08
YLR045C	1191.6	-1.27828	0.223712	4.6e-09	1.88e-08
YGL101W	919.155	-1.2059	0.210732	4.78e-09	1.96e-08
YNR021W	4471.52	-1.01937	0.177221	4.89e-09	2e-08
YNL312W	1244.48	-1.08822	0.189778	5.05e-09	2.06e-08
YGR054W	3437.29	-1.04154	0.181986	5.15e-09	2.1e-08
YFL031W	7187.88	-1.0608	0.184926	5.65e-09	2.3e-08
YBL068W	1041.73	-1.18544	0.208168	5.71e-09	2.32e-08
YJL002C	5000.05	-1.02055	0.1783	5.77e-09	2.34e-08
YHL013C	693.937	-1.23486	0.217495	5.97e-09	2.42e-08
YDR225W	15841.7	-1.38638	0.247222	6.48e-09	2.62e-08
YLR018C	814.533	-1.34916	0.239553	6.82e-09	2.75e-08
YDR051C	747.796	-1.11243	0.196367	7.38e-09	2.97e-08
YKR085C	639.652	-1.2254	0.217135	7.38e-09	2.97e-08
YNL162W-A	186.031	-2.39263	0.439308	7.46e-09	3e-08
YJL158C	5875.04	-1.30901	0.232978	7.75e-09	3.11e-08
YER016W	885.534	-1.37	0.244432	7.83e-09	3.14e-08
YDR266C	1278.51	-1.12333	0.199451	7.97e-09	3.2e-08
YGL195W	4254.94	-1.18363	0.210763	8.07e-09	3.23e-08
YIL038C	1849.76	-1.21089	0.215126	8.13e-09	3.25e-08
YDR367W	806.034	-1.15883	0.205545	8.21e-09	3.28e-08
YML061C	933.226	-1.1015	0.195081	8.31e-09	3.32e-08
YGL063W	450.086	-1.41634	0.25385	8.6e-09	3.42e-08
YJR064W	3629.41	-1.1868	0.211195	8.8e-09	3.5e-08
YEL061C	1266.46	-1.17473	0.209115	9.02e-09	3.58e-08
YFL036W	1293.49	-1.21665	0.216902	9.06e-09	3.6e-08
YAL012W	6771.34	-1.27051	0.226937	9.15e-09	3.63e-08
YOR370C	3830.47	-1.0694	0.190026	9.59e-09	3.8e-08
YER177W	15659.3	-1.25089	0.223728	9.87e-09	3.91e-08
YBR244W	2067.85	-1.05612	0.187905	1.01e-08	4.01e-08
YPL235W	1912.26	-1.14387	0.204115	1.01e-08	4e-08
YLR339C	28.6342	-4.12071	0.76249	1.19e-08	4.69e-08
snR18	57.4167	-2.46764	0.46041	1.27e-08	4.98e-08
YPL244C	1529.71	-1.06164	0.190409	1.31e-08	5.12e-08
YJL207C	1382.99	-1.17385	0.211385	1.31e-08	5.14e-08
YPL101W	1242.26	-1.12468	0.202243	1.32e-08	5.17e-08
YPL193W	659.383	-1.68567	0.309375	1.34e-08	5.25e-08
YDR280W	1367.49	-1.23751	0.22358	1.35e-08	5.28e-08
YJR048W	1035.25	-1.36808	0.248376	1.36e-08	5.31e-08
YGL139W	1553.07	-1.1169	0.201111	1.39e-08	5.4e-08
YMR263W	550.309	-1.26471	0.228949	1.4e-08	5.45e-08
snR17b	29.0772	-4.39517	0.815254	1.42e-08	5.49e-08
YBR060C	835.757	-1.25196	0.226702	1.43e-08	5.54e-08
YOR301W	676.264	-1.11624	0.201576	1.52e-08	5.89e-08
YNL234W	468.75	-1.27994	0.2325	1.53e-08	5.92e-08
snR4	199.719	-1.46413	0.267667	1.53e-08	5.92e-08
YOR305W	685.153	-1.17728	0.213148	1.55e-08	5.98e-08
YOR291W	854.941	-1.11748	0.202042	1.59e-08	6.11e-08
YHR064C	6765.39	-1.39665	0.255208	1.6e-08	6.17e-08
YMR069W	50.6397	-2.81254	0.532463	1.64e-08	6.31e-08
YEL034C-A	113.62	-1.98378	0.369919	1.68e-08	6.45e-08
YJR105W	7492.32	-1.06369	0.192529	1.72e-08	6.61e-08
YJL008C	4062.49	-1.02258	0.184941	1.76e-08	6.73e-08
YDR448W	405.002	-1.19511	0.217449	1.79e-08	6.84e-08
YGR195W	952.181	-1.414	0.259464	1.79e-08	6.87e-08
YJR092W	1261.82	-1.31421	0.240541	1.86e-08	7.11e-08
YOL012C	1247.96	-1.24424	0.227497	1.95e-08	7.43e-08
YGL097W	2254.15	-1.12634	0.20541	2.06e-08	7.86e-08
YBR130C	1211.79	-1.02054	0.185534	2.07e-08	7.89e-08
snR54	32.1898	-3.86636	0.736687	2.07e-08	7.89e-08
YFL034C-B	695.572	-1.10672	0.201932	2.14e-08	8.12e-08
YGL099W	1661.37	-1.51965	0.281883	2.21e-08	8.4e-08
YNR046W	893.245	-1.50625	0.279262	2.22e-08	8.41e-08
YJL092W	1071.74	-1.21522	0.223374	2.37e-08	8.99e-08
YLR272C	729.518	-1.11022	0.203695	2.5e-08	9.48e-08
YOR243C	2229.08	-1.62904	0.304779	2.53e-08	9.55e-08
YPR063C	2174.41	-1.04467	0.191466	2.62e-08	9.89e-08
YOR084W	455.571	-1.60908	0.301086	2.62e-08	9.88e-08
YMR001C	1370.47	-1.0865	0.200161	2.93e-08	1.1e-07
YOR160W	1027.71	-1.21956	0.225798	2.93e-08	1.1e-07
YLR259C	7249.24	-1.14664	0.211711	2.98e-08	1.12e-07
YHL004W	1205.51	-1.0352	0.190711	3.1e-08	1.17e-07
YDR364C	884.33	-1.23711	0.22999	3.25e-08	1.22e-07
YCL011C	4602.72	-1.04133	0.192309	3.28e-08	1.23e-07
YBL082C	764.244	-1.30267	0.242887	3.3e-08	1.23e-07
YBR265W	1556.27	-1.13121	0.209767	3.31e-08	1.24e-07
YDR395W	2964.7	-1.33929	0.250364	3.41e-08	1.27e-07
YPL128C	802.732	-1.17754	0.219021	3.53e-08	1.32e-07
YCL043C	10744.1	-1.14614	0.213424	3.73e-08	1.39e-07
YMR102C	1329.48	-1.02703	0.190622	3.92e-08	1.46e-07
YJR144W	1229.24	-1.0695	0.198854	3.94e-08	1.46e-07
YHR099W	1902.92	-1.13597	0.211868	4e-08	1.48e-07
YIL070C	708.264	-1.18952	0.223157	4.4e-08	1.63e-07
YPL144W	357.63	-1.24807	0.234826	4.6e-08	1.7e-07
YBR094W	737.409	-1.16836	0.219512	4.8e-08	1.77e-07
YNR003C	769.463	-1.6761	0.321624	4.95e-08	1.82e-07
YPL009C	2927.18	-1.02219	0.191813	5.05e-08	1.85e-07
snR128	25.9592	-4.52658	0.872906	5.24e-08	1.92e-07
YFR034W-A	378.888	-1.26678	0.240425	5.78e-08	2.11e-07
YKL191W	1553.64	-1.52552	0.292905	5.87e-08	2.14e-07
YNR028W	1003.03	-1.07373	0.20266	6.06e-08	2.2e-07
YNR038W	1194.26	-1.42738	0.273392	6.21e-08	2.26e-07
YPL157W	805.269	-1.31122	0.250627	6.69e-08	2.43e-07
YOR252W	868.563	-1.55535	0.300575	6.87e-08	2.49e-07
YBL002W	12286	-1.40072	0.269277	7.06e-08	2.56e-07
YDL093W	892.173	-1.03651	0.196498	7.21e-08	2.61e-07
YMR193C-A	36.0313	-3.01245	0.602271	7.31e-08	2.64e-07
YOL094C	585.817	-1.06667	0.202834	7.63e-08	2.75e-07
YNL232W	1237.41	-1.19359	0.228493	7.86e-08	2.83e-07
YHR143W-A	1516.62	-1.32672	0.255205	7.95e-08	2.87e-07
YLL022C	728.266	-1.08941	0.207836	8.14e-08	2.93e-07
YIL035C	2244.04	-1.01526	0.193246	8.29e-08	2.98e-07
YNL050C	845.614	-1.16008	0.222203	8.41e-08	3.02e-07
snR59	26.6092	-4.23629	0.842502	8.67e-08	3.11e-07
YLR419W	1008.6	-1.23442	0.237428	8.69e-08	3.11e-07
YMR269W	776.752	-1.57648	0.307582	8.79e-08	3.14e-07
YNL185C	238.793	-1.30178	0.251568	9.25e-08	3.3e-07
YDR310C	1967.11	-1.13865	0.219558	9.73e-08	3.47e-07
YJL208C	895.975	-1.19065	0.229635	9.93e-08	3.53e-07
YML052W	2266.82	-1.11107	0.213715	1e-07	3.56e-07
YDR346C	4218.81	-1.11198	0.213856	1e-07	3.56e-07
YHR121W	1137.9	-1.02622	0.197257	1.07e-07	3.79e-07
YHR144C	469.984	-1.37024	0.267319	1.1e-07	3.91e-07
YBL035C	627.058	-1.05846	0.204135	1.14e-07	4.04e-07
YDR365C	2907.13	-1.85002	0.368923	1.18e-07	4.18e-07
YGL238W	2725.38	-1.07752	0.208576	1.23e-07	4.34e-07
YOL115W	1062.51	-1.10056	0.213455	1.27e-07	4.48e-07
YDL064W	905.952	-1.16316	0.226132	1.27e-07	4.47e-07
YJR041C	1255.23	-1.80081	0.35912	1.27e-07	4.48e-07
YKR037C	353.156	-1.16514	0.226775	1.31e-07	4.61e-07
YMR233W	416.708	-1.27202	0.248783	1.32e-07	4.63e-07
YDR023W	7383.87	-1.01967	0.197557	1.34e-07	4.71e-07
YLR014C	629.192	-1.64962	0.328342	1.35e-07	4.75e-07
YLR139C	401.772	-1.14339	0.222661	1.36e-07	4.76e-07
YGR035C	239.006	-1.35748	0.266819	1.38e-07	4.81e-07
YGR279C	7082.43	-1.0893	0.212283	1.51e-07	5.25e-07
YMR147W	155.078	-1.41191	0.279121	1.52e-07	5.27e-07
YLR234W	202.714	-1.29815	0.255654	1.55e-07	5.39e-07
YOL021C	2077.29	-1.22838	0.242074	1.69e-07	5.86e-07
YKL042W	428.567	-1.25013	0.246601	1.71e-07	5.91e-07
YLR440C	793.278	-1.04122	0.203683	1.72e-07	5.96e-07
YGR108W	1439.49	-1.48211	0.295722	1.75e-07	6.04e-07
snR45	37.6571	-2.66313	0.549683	1.81e-07	6.23e-07
snR191	29.702	-3.71275	0.773078	1.92e-07	6.59e-07
YML103C	2179.99	-1.14425	0.22646	2.09e-07	7.16e-07
YGR004W	372.168	-1.15311	0.228789	2.22e-07	7.59e-07
YBR010W	10990.6	-1.06503	0.210769	2.25e-07	7.67e-07
YJL209W	662.276	-1.05119	0.208233	2.38e-07	8.09e-07
YHR013C	1028.1	-1.0754	0.21328	2.39e-07	8.12e-07
YBR061C	845.736	-1.22081	0.244797	2.7e-07	9.11e-07
YCR047C	1442.19	-1.54831	0.315349	2.76e-07	9.3e-07
YBR085W	148.786	-1.8255	0.376216	2.8e-07	9.43e-07
YKL201C	2559.82	-1.25674	0.256143	3.89e-07	1.3e-06
YGL061C	334.501	-1.1881	0.241403	3.92e-07	1.31e-06
YGR099W	618.097	-1.18388	0.241055	4.17e-07	1.38e-06
YFL037W	5348.06	-1.02643	0.207302	4.22e-07	1.4e-06
YDL155W	1002.97	-1.08893	0.221911	4.72e-07	1.55e-06
YOR271C	3339.72	-1.09277	0.222778	4.72e-07	1.55e-06
YPR052C	396.499	-1.31509	0.27099	4.81e-07	1.58e-06
YNL299W	961.148	-1.33243	0.274886	4.82e-07	1.58e-06
YHL020C	1361.64	-1.22135	0.25071	4.86e-07	1.59e-06
YNR019W	1122.67	-1.1514	0.236005	5.06e-07	1.65e-06
YBL079W	2244.33	-1.08083	0.220684	5.08e-07	1.66e-06
YMR058W	4513.18	-1.0581	0.216594	5.29e-07	1.72e-06
YJR055W	217.824	-1.54395	0.322831	5.29e-07	1.72e-06
YDR397C	1750.79	-1.12622	0.231037	5.33e-07	1.73e-06
YKL130C	473.938	-1.06566	0.218424	5.6e-07	1.82e-06
YDL036C	585.868	-1.18245	0.24405	5.8e-07	1.88e-06
YNL044W	1862.73	-1.09683	0.22633	6.25e-07	2.02e-06
YBR252W	959.545	-1.04564	0.215747	6.65e-07	2.14e-06
snR87	28.0954	-2.92042	0.640741	7.08e-07	2.28e-06
YOR028C	193.462	-1.24217	0.25947	7.29e-07	2.34e-06
YBR155W	1285.24	-1.34899	0.283522	7.37e-07	2.36e-06
YOL076W	1261.79	-1.11387	0.231581	7.46e-07	2.39e-06
YDR527W	1865.24	-1.14382	0.238249	7.52e-07	2.41e-06
YJR043C	568.77	-1.05031	0.21851	8.13e-07	2.6e-06
YKR010C	777.606	-1.10615	0.2308	8.15e-07	2.6e-06
YKR074W	862.852	-1.12532	0.235074	8.27e-07	2.64e-06
YGR169C	306.418	-1.13982	0.238292	8.31e-07	2.65e-06
YIL009W	905.299	-1.15315	0.241337	8.36e-07	2.66e-06
YOR298C-A	6664.65	-1.07158	0.223697	8.59e-07	2.73e-06
YBR091C	237.445	-1.28859	0.271896	8.71e-07	2.77e-06
YDR065W	325.187	-1.07681	0.225002	8.82e-07	2.8e-06
YOR295W	283.255	-1.21711	0.256902	9.53e-07	3.02e-06
YER146W	965.241	-1.10301	0.231847	9.58e-07	3.03e-06
YPL255W	550.568	-1.2224	0.2583	9.72e-07	3.07e-06
YEL048C	285.545	-1.36325	0.290157	9.76e-07	3.08e-06
YMR223W	561.907	-1.13226	0.23835	9.83e-07	3.11e-06
YHL031C	471.8	-1.14519	0.241345	9.96e-07	3.14e-06
YNL163C	1849.88	-1.22529	0.260517	1.13e-06	3.54e-06
YAL019W	1843.19	-1.16903	0.248393	1.17e-06	3.67e-06
YDR120C	2675.8	-1.47759	0.318901	1.17e-06	3.66e-06
YLR052W	1039.75	-1.07983	0.228536	1.18e-06	3.69e-06
YML094W	678.549	-1.11891	0.237266	1.18e-06	3.7e-06
YHR032W	2035.94	-1.15249	0.244743	1.18e-06	3.68e-06
YAR015W	6425.41	-1.41502	0.304129	1.19e-06	3.73e-06
YPR190C	1525.63	-1.38664	0.298575	1.22e-06	3.81e-06
YLR397C	1324.3	-1.27414	0.272884	1.24e-06	3.86e-06
YPL201C	49.7446	-2.15596	0.483321	1.45e-06	4.5e-06
YGR081C	964.304	-1.08609	0.232285	1.5e-06	4.64e-06
YBR086C	3962.95	-1.11384	0.238825	1.53e-06	4.74e-06
YIL132C	156.244	-1.51204	0.331756	1.64e-06	5.05e-06
YNL199C	1397.81	-1.05777	0.227002	1.66e-06	5.13e-06
YLR067C	598.472	-1.03054	0.220998	1.69e-06	5.2e-06
YDR503C	200.242	-1.2387	0.268399	1.69e-06	5.21e-06
YPL207W	4088.39	-1.37573	0.302095	1.94e-06	5.95e-06
YAL044C	6223.36	-1.02848	0.222881	2.14e-06	6.53e-06
YDL022W	3143.96	-1.56014	0.347846	2.15e-06	6.56e-06
YNL256W	1914.03	-1.0268	0.223348	2.32e-06	7.06e-06
YOR159C	821.302	-1.06623	0.232544	2.36e-06	7.17e-06
YDR300C	1394.84	-1.31545	0.290775	2.36e-06	7.16e-06
YGR160W	26.8758	-3.20196	0.750744	2.37e-06	7.18e-06
YKL144C	538.548	-1.13769	0.24988	2.54e-06	7.68e-06
YHR061C	334.694	-1.34008	0.298149	2.65e-06	8.01e-06
YLR214W	680.635	-1.16643	0.257352	2.7e-06	8.16e-06
YIL104C	728.696	-1.33457	0.297262	2.72e-06	8.2e-06
YLR096W	1489.67	-1.0457	0.230287	2.96e-06	8.87e-06
YBR009C	14011.6	-1.2354	0.27443	3.02e-06	9.05e-06
YIR012W	2747.68	-1.16997	0.260183	3.17e-06	9.48e-06
YOR074C	756.138	-1.27638	0.286391	3.4e-06	1.01e-05
YOR083W	285.644	-1.4991	0.340678	3.42e-06	1.01e-05
YPL267W	472.942	-1.13108	0.251881	3.43e-06	1.02e-05
YNL072W	307.212	-1.24912	0.280041	3.45e-06	1.02e-05
YDL156W	321.847	-1.01081	0.224129	3.6e-06	1.06e-05
YJL181W	297.473	-1.12821	0.252357	3.79e-06	1.12e-05
YLL038C	545.898	-1.09395	0.24496	4.02e-06	1.18e-05
YBR115C	6751.27	-1.23181	0.278107	4.04e-06	1.19e-05
YBL063W	581.846	-1.33479	0.303293	4.09e-06	1.2e-05
YGR129W	281.081	-1.42045	0.324869	4.24e-06	1.24e-05
YML023C	553.616	-1.0135	0.227294	4.54e-06	1.33e-05
YLR141W	294.865	-1.03691	0.233463	4.81e-06	1.4e-05
YGL211W	1024.19	-1.10626	0.250209	4.81e-06	1.4e-05
snR24	37.94	-3.0021	0.740682	5.31e-06	1.53e-05
YKR045C	255.096	-1.23954	0.284206	5.53e-06	1.59e-05
YMR300C	3602.32	-1.17245	0.267891	5.55e-06	1.6e-05
YDR361C	1432.07	-1.42296	0.331694	5.96e-06	1.71e-05
YJL035C	205.327	-1.13577	0.26111	6.56e-06	1.88e-05
YLR149C-A	12.17	-6.95439	2.7119	9.07e-06	2.55e-05
YCR087W	33.856	-2.58331	0.649017	9.09e-06	2.55e-05
YOR287C	360.993	-4.42925	1.19594	9.96e-06	2.79e-05
YAL040C	985.499	-1.03515	0.242121	1.02e-05	2.86e-05
YOL151W	1390.41	-1.13646	0.268033	1.06e-05	2.97e-05
YML108W	600.411	-1.34205	0.321095	1.09e-05	3.04e-05
YKL083W	34.8496	-2.16163	0.540827	1.14e-05	3.16e-05
YGR052W	113.103	-1.77958	0.439302	1.19e-05	3.31e-05
YIL078W	10730.9	-1.00336	0.237516	1.32e-05	3.66e-05
YAR071W	235.031	-1.08244	0.257639	1.35e-05	3.73e-05
snR189	21.0208	-2.80824	0.727496	1.56e-05	4.27e-05
YDL016C	68.1759	-1.60997	0.400331	1.63e-05	4.45e-05
YGR146C	169.663	-1.11118	0.267731	1.64e-05	4.48e-05
YPL058C	3936.12	-1.25685	0.308405	2.05e-05	5.56e-05
snR38	16.6351	-4.65339	1.18562	2.31e-05	6.21e-05
YJR053W	262.293	-1.02752	0.251177	2.32e-05	6.23e-05
snR11	69.9593	-1.58197	0.401725	2.37e-05	6.37e-05
YDL101C	404.79	-1.15561	0.286607	2.57e-05	6.88e-05
YHR032W-A	177.515	-1.25363	0.313954	2.7e-05	7.21e-05
YKL202W	363.2	-1.31632	0.334472	3.15e-05	8.29e-05
YIL008W	817.505	-1.05908	0.26541	3.41e-05	8.92e-05
snR76	16.5636	-3.14989	0.867589	3.8e-05	9.88e-05
YIL020C	599.94	-1.12279	0.284795	3.88e-05	0.000101
YDR263C	198.534	-1.02358	0.257974	3.93e-05	0.000102
YDL121C	1332.95	-1.19679	0.305644	3.93e-05	0.000102
YMR312W	517.502	-1.2201	0.312203	3.98e-05	0.000103
YPL108W	249.948	-1.16251	0.296978	4.17e-05	0.000108
YBR242W	744.248	-1.09133	0.277837	4.27e-05	0.00011
YOR207C	2578.54	-1.19481	0.306986	4.38e-05	0.000113
YOL125W	897.725	-1.20362	0.311488	4.85e-05	0.000124
YNL308C	4640.89	-1.11934	0.291292	5.83e-05	0.000148
YDR345C	28633	-1.27636	0.33683	5.99e-05	0.000152
YNR009W	595.534	-1.07631	0.279968	6.13e-05	0.000156
YNL022C	1110.37	-1.04678	0.272178	6.28e-05	0.000159
YCL058C	24.2105	-2.5872	0.741736	6.33e-05	0.00016
YER026C	4065.86	-1.12542	0.296104	6.87e-05	0.000173
YIL011W	106.228	-1.33187	0.35902	7.8e-05	0.000195
YBR160W	766.757	-1.02259	0.270773	8.55e-05	0.000212
YLR384C	3130.43	-1.0352	0.275246	8.85e-05	0.000219
YDL158C	16.5898	-2.8994	0.858195	9.38e-05	0.000231
YHR152W	398.904	-1.1063	0.297552	9.81e-05	0.000242
YOR102W	28.0817	-2.24739	0.65855	0.0001	0.000246
YMR239C	1002.24	-1.22054	0.33255	0.000101	0.000249
YPL153C	399.575	-1.0392	0.281491	0.000117	0.000287
YJL098W	2419.7	-1.03368	0.281195	0.000124	0.000302
YHR153C	52.6822	-1.68629	0.488196	0.000138	0.000333
YIR034C	20378.9	-1.21178	0.339468	0.00015	0.000361
YMR144W	334.395	-1.08547	0.303085	0.00017	0.000405
YFR032C	16.1164	-3.02402	0.956517	0.000181	0.000429
YBR196C-B	37.2341	-1.6686	0.49248	0.000182	0.00043
YCR021C	147.987	-1.126	0.319608	0.000203	0.000476
snR83	110.577	-1.08297	0.3085	0.000224	0.000524
snR85	13.4057	-3.01416	0.96314	0.000228	0.000533
YMR182C	141.404	-1.10381	0.319461	0.000267	0.000618
YNR024W	713.312	-1.06974	0.311135	0.000294	0.000677
YCR063W	157.48	-1.12989	0.332025	0.000313	0.000717
snR47	20.8018	-2.11663	0.679222	0.000317	0.000725
YKL023C-A	87.0015	-1.14979	0.339425	0.000325	0.000743
YBR070C	393.074	-1.00348	0.29424	0.000353	0.000802
snR37	33.9248	-1.77785	0.563812	0.000364	0.000825
snR8	70.8655	-1.18668	0.357619	0.0004	0.0009
LSR1	79.6936	-1.34302	0.41962	0.000493	0.001094
YBL055C	644.591	-1.03467	0.316936	0.000571	0.001254
snR13	12.8293	-2.64951	0.934606	0.000608	0.001329
YOL022C	1149.41	-1.07045	0.334705	0.000688	0.00149
YGR096W	144.231	-1.10223	0.363855	0.001168	0.002446
YDR509W	8.838	-3.47631	1.30775	0.001203	0.002512
YDR343C	39.2374	-1.36645	0.468571	0.001231	0.002563
YBR196C-A	34.0951	-1.68806	0.609659	0.001308	0.002712
YBR184W	84.2374	-1.02641	0.351823	0.001841	0.003712
YJR115W	87.8505	-1.20751	0.428879	0.002009	0.004028
YHR021W-A	33.1001	-1.38445	0.503948	0.002018	0.004045
snR32	20.5743	-1.68582	0.646767	0.002154	0.004291
YMR001C-A	64.1872	-1.12099	0.401953	0.002446	0.004825
YNL097C-B	70.0801	-1.06401	0.385937	0.002883	0.005609
SCR1	33.2888	-1.29626	0.501565	0.003582	0.006854
YOR121C	90.0763	-1.01898	0.380622	0.003849	0.00731
YML094C-A	10.0241	-2.34001	1.10814	0.004354	0.008192
snR67	46.341	-1.12605	0.434864	0.004357	0.008194
snR39B	21.7585	-1.52364	0.635382	0.004474	0.008397
YMR303C	43.1344	-1.17083	0.458402	0.004539	0.008506
YPR142C	24.8612	-1.62869	0.704507	0.00479	0.008929
snR82	66.8633	-1.11243	0.435014	0.004817	0.008978
YHR182C-A	25.5186	-1.36012	0.561235	0.005123	0.009479
YGR228W	39.8458	-1.12999	0.44781	0.005222	0.009636
snR34	50.4517	-1.06413	0.417917	0.005319	0.009793
YLL042C	28.3305	-1.27995	0.526642	0.005562	0.010195
IRT1	37.4408	-1.17783	0.48574	0.00639	0.011603
YDR344C	49.6559	-1.12142	0.460935	0.006696	0.01212
YDR342C	29.5076	-1.24586	0.530944	0.007212	0.012969
YLR042C	37.9638	-1.09616	0.470054	0.009055	0.015972
YGR249W	42.683	-1.17959	0.523627	0.009853	0.017269
YBR266C	8.76229	-2.03825	1.13605	0.0101	0.017664
snR35	15.9471	-1.46405	0.710826	0.010828	0.018798
YFR036W-A	35.6425	-1.20497	0.551572	0.011229	0.019418
YCR025C	27.1216	-1.21897	0.566248	0.011937	0.020556
YLR265C	32.7086	-1.07622	0.495945	0.0139	0.023691
snR48	11.3723	-1.62256	0.966669	0.01822	0.030259
YDR396W	13.3619	-1.42566	0.797507	0.019646	0.032391
YER087C-A	19.136	-1.25014	0.658838	0.020144	0.033105
YGR146C-A	12.2672	-1.40815	0.802484	0.021516	0.035098
YER148W-A	19.2698	-1.22388	0.696061	0.027257	0.043441
tG(GCC)G1	7.8155	-1.54879	1.04959	0.02819	0.044753
tR(UCU)G2	13.7632	-1.26012	0.745264	0.029585	0.0467

## Sheet: edger_common_down_1210
targetID	log2FoldChange	P.Value	FDR	logCPM
YGR055W	-5.83501	3.04e-07	0.000136	8.49949
YOL039W	-5.54005	4.4e-07	0.000136	9.42838
YLR185W	-4.69507	4.43e-07	0.000136	8.65057
YER131W	-6.53083	4.93e-07	0.000136	9.63991
YJL190C	-6.07815	5.21e-07	0.000136	9.63585
YLR388W	-4.5419	6.11e-07	0.000136	8.1836
YGR034W	-5.40943	6.86e-07	0.000136	9.52001
YHR010W	-5.14055	6.9e-07	0.000136	9.54496
YGL147C	-5.97462	7.16e-07	0.000136	9.43617
YFR032C-A	-4.34172	7.95e-07	0.000136	7.61119
YHR021C	-4.73181	8.11e-07	0.000136	8.74889
YPL131W	-5.59613	8.37e-07	0.000136	10.7398
YML073C	-3.92286	8.57e-07	0.000136	9.13879
YDL082W	-4.81766	9.73e-07	0.000136	9.20564
YLR406C	-5.4652	9.75e-07	0.000136	9.01253
YOR344C	-2.85821	9.76e-07	0.000136	6.72754
YGL031C	-5.57942	1.05e-06	0.000136	9.64221
YLR372W	-3.66857	1.07e-06	0.000136	8.49912
YNL069C	-5.07996	1.09e-06	0.000136	10.0884
YPL198W	-4.37415	1.11e-06	0.000136	8.49572
YAL037C-B	-3.22642	1.12e-06	0.000136	4.67158
YPL249C-A	-4.90077	1.13e-06	0.000136	10.1591
YDR508C	-3.51398	1.15e-06	0.000136	8.74023
YNL178W	-5.33653	1.22e-06	0.000136	10.3331
YJR009C	-5.43488	1.23e-06	0.000136	11.4662
YJL189W	-4.21917	1.24e-06	0.000136	8.90883
YOL120C	-4.52476	1.28e-06	0.000136	10.1082
YKL056C	-4.83212	1.3e-06	0.000136	10.0121
YOL040C	-4.97226	1.31e-06	0.000136	10.2022
snR44	-3.50237	1.35e-06	0.000136	4.3031
YDL081C	-4.42736	1.41e-06	0.000136	9.63324
YDR025W	-4.4612	1.41e-06	0.000136	9.44645
YLR264W	-4.39559	1.46e-06	0.000136	8.20343
YDR012W	-4.0466	1.47e-06	0.000136	9.2807
YNL302C	-4.53587	1.49e-06	0.000136	9.63036
YBR189W	-5.4222	1.57e-06	0.000136	10.4432
YBR092C	-4.38437	1.66e-06	0.000136	5.71776
YPR102C	-5.10348	1.67e-06	0.000136	9.26729
YDR471W	-4.22399	1.7e-06	0.000136	9.13475
YJR145C	-5.28419	1.73e-06	0.000136	10.2413
YJL177W	-5.51033	1.74e-06	0.000136	9.19202
YDL130W	-5.03288	1.76e-06	0.000136	9.56481
YDL184C	-4.33435	1.79e-06	0.000136	10.5883
YBL087C	-5.02626	1.81e-06	0.000136	8.86856
YBR069C	-4.16334	1.81e-06	0.000136	7.85667
YCR034W	-3.62297	1.86e-06	0.000136	7.48851
YMR116C	-5.47279	1.87e-06	0.000136	10.5435
YDR144C	-2.3705	1.89e-06	0.000136	6.32636
YHR141C	-4.1256	1.93e-06	0.000136	9.64859
YNL067W	-3.33757	1.93e-06	0.000136	9.15694
YKL109W	-2.52799	1.96e-06	0.000136	7.19831
YLR432W	-4.63882	1.98e-06	0.000136	9.10357
YMR230W	-4.25625	1.99e-06	0.000136	8.95721
YIL069C	-4.60613	2.1e-06	0.000136	9.17616
YNR050C	-4.47625	2.1e-06	0.000136	10.5272
YLR367W	-3.59797	2.16e-06	0.000136	7.68119
YMR194W	-3.5934	2.18e-06	0.000136	8.60601
YMR143W	-4.06007	2.19e-06	0.000136	9.69827
YDL133C-A	-3.92402	2.2e-06	0.000136	9.40668
YDR064W	-4.70102	2.2e-06	0.000136	9.94616
YLR061W	-5.01356	2.22e-06	0.000136	9.40926
YOR293W	-4.96166	2.23e-06	0.000136	9.5872
YBR191W	-5.2758	2.24e-06	0.000136	8.8851
YLR150W	-4.6535	2.24e-06	0.000136	10.1661
YDL191W	-3.81095	2.27e-06	0.000136	8.0248
YMR145C	-3.12098	2.27e-06	0.000136	8.21232
YBL092W	-5.03907	2.33e-06	0.000136	10.1472
YDL083C	-5.70712	2.36e-06	0.000136	9.67814
YEL054C	-5.28799	2.37e-06	0.000136	9.60888
YPL250W-A	-4.5235	2.39e-06	0.000136	3.98274
YFR031C-A	-4.68641	2.49e-06	0.000136	10.0312
YKL006W	-5.01403	2.49e-06	0.000136	9.59675
YBR031W	-4.08924	2.57e-06	0.000136	10.1783
YKR057W	-4.15611	2.59e-06	0.000136	9.0262
YJR094W-A	-4.37378	2.61e-06	0.000136	8.97073
YGL189C	-4.31912	2.67e-06	0.000136	10.2018
YNR053C	-4.86283	2.67e-06	0.000136	7.99457
YOR063W	-4.72601	2.69e-06	0.000136	11.5952
YDL061C	-4.1224	2.7e-06	0.000136	8.6
YML026C	-4.77755	2.71e-06	0.000136	9.86605
YHL033C	-4.14622	2.73e-06	0.000136	9.2272
YOR096W	-5.06268	2.73e-06	0.000136	9.74313
YLR325C	-4.5336	2.76e-06	0.000136	9.92189
YGL076C	-4.29464	2.89e-06	0.000136	10.2024
YDR382W	-4.9027	2.9e-06	0.000136	9.67409
YOR095C	-6.91687	2.94e-06	0.000136	6.23654
YGL123W	-4.40291	2.96e-06	0.000136	10.964
YML024W	-3.7558	2.99e-06	0.000136	9.54511
YHL015W	-4.78461	3.04e-06	0.000136	10.6196
YBR291C	-3.32152	3.08e-06	0.000136	7.68965
YDR222W	-2.88744	3.08e-06	0.000136	4.31689
YIL052C	-4.8243	3.08e-06	0.000136	9.29741
YIL169C	-3.24426	3.14e-06	0.000136	5.57535
YBL072C	-4.41499	3.17e-06	0.000136	9.64566
YDR418W	-3.71123	3.23e-06	0.000136	9.75734
YBR048W	-4.10808	3.24e-06	0.000136	9.37451
YLR167W	-5.33423	3.25e-06	0.000136	11.2832
YLR029C	-4.58723	3.27e-06	0.000136	10.6421
YER074W	-4.37915	3.28e-06	0.000136	9.41576
YKL180W	-4.59676	3.3e-06	0.000136	9.67361
YIL018W	-4.32345	3.4e-06	0.000136	10.6537
YOR234C	-3.60083	3.4e-06	0.000136	8.44833
YDL136W	-3.76659	3.45e-06	0.000136	8.65054
YDL075W	-4.27014	3.46e-06	0.000136	9.7796
YOL121C	-4.44453	3.5e-06	0.000136	8.99729
YBL029W	-3.1203	3.54e-06	0.000136	5.26392
YER117W	-4.0131	3.54e-06	0.000136	9.71809
YIL158W	-2.37831	3.64e-06	0.000139	5.80928
YER056C-A	-4.65693	3.68e-06	0.000139	8.88813
YPR043W	-4.13791	3.73e-06	0.00014	9.8179
YJR123W	-4.60809	3.75e-06	0.00014	10.9652
YOR310C	-3.61572	3.82e-06	0.000142	7.8645
YDR450W	-4.22419	3.86e-06	0.000143	9.79358
YOR342C	-3.28233	3.97e-06	0.000145	6.69002
YNR054C	-3.5403	4.01e-06	0.000145	5.43953
YLL045C	-4.95734	4.04e-06	0.000146	10.5655
YIL148W	-3.89705	4.09e-06	0.000147	9.57339
YPL143W	-3.89233	4.16e-06	0.000148	9.66046
YPL090C	-4.37208	4.23e-06	0.000148	9.89865
YHR049W	-2.34691	4.44e-06	0.000153	6.91681
YBR025C	-4.27093	4.46e-06	0.000153	8.84835
YKR094C	-3.86756	4.52e-06	0.000154	9.40354
YOR369C	-4.63964	4.54e-06	0.000154	10.5169
YOR167C	-3.28165	4.63e-06	0.000156	9.03368
YGR148C	-3.91617	4.71e-06	0.000156	9.56387
YIL133C	-4.31168	4.85e-06	0.000157	9.53229
YDL048C	-2.19229	4.88e-06	0.000157	6.2587
YLR048W	-4.78357	4.92e-06	0.000158	10.0549
YDR047W	-2.43984	4.94e-06	0.000158	6.5898
YML063W	-4.88361	5.1e-06	0.000161	10.1895
YIL094C	-3.60638	5.23e-06	0.000164	10.2528
YHR089C	-4.68246	5.24e-06	0.000164	8.03835
YPL079W	-3.60944	5.3e-06	0.000164	9.32312
YLR413W	-5.82832	5.33e-06	0.000164	8.10084
YDR500C	-3.77433	5.34e-06	0.000164	9.30476
YJR147W	-3.00078	5.36e-06	0.000164	5.55236
YOR226C	-2.24439	5.37e-06	0.000164	6.86129
YKL152C	-4.07376	5.61e-06	0.00017	12.0552
YOR312C	-3.8605	5.74e-06	0.000173	9.70789
YBL081W	-2.63316	5.9e-06	0.000175	6.27206
YOR182C	-3.93557	5.9e-06	0.000175	8.01353
YDR233C	-2.51	6.01e-06	0.000176	8.78536
YLR448W	-4.18182	6.01e-06	0.000176	8.72107
YNL301C	-2.72686	6.16e-06	0.000177	7.71753
YEL042W	-2.40037	6.31e-06	0.00018	7.45309
YJL136C	-3.92841	6.39e-06	0.000182	9.43643
YOL127W	-4.17566	6.44e-06	0.000182	10.2099
YMR242C	-4.38006	6.55e-06	0.000183	9.57888
YKL153W	-3.48891	6.57e-06	0.000183	4.25284
YCR031C	-4.22544	6.6e-06	0.000183	10.0504
YNL162W	-3.84721	6.64e-06	0.000183	9.39402
YER102W	-4.80565	6.67e-06	0.000183	9.13918
YLR044C	-4.37809	6.75e-06	0.000184	12.9798
YJL011C	-3.02412	6.77e-06	0.000184	4.31208
YOR340C	-5.29519	6.8e-06	0.000184	6.4081
YGR027C	-3.31075	6.88e-06	0.000184	9.88724
YOL093W	-3.17333	6.94e-06	0.000184	5.66509
YDR447C	-4.21097	7.02e-06	0.000185	9.22126
YLR287C-A	-2.96557	7.13e-06	0.000187	9.50566
YKL081W	-3.23835	7.35e-06	0.00019	9.83284
YMR290C	-5.66722	7.42e-06	0.000191	7.41118
YPR132W	-3.80163	7.46e-06	0.000191	9.9073
YCL037C	-5.90725	7.6e-06	0.000193	2.43569
YGR214W	-4.64708	7.63e-06	0.000193	9.73032
YGL030W	-4.43676	7.67e-06	0.000193	9.97592
YBL024W	-2.68008	7.78e-06	0.000194	7.09232
YCR013C	-3.62538	7.81e-06	0.000194	3.65222
YNL292W	-2.55334	7.82e-06	0.000194	5.54952
YGL103W	-4.16134	7.91e-06	0.000195	10.5043
YER064C	-3.04996	8e-06	0.000196	5.83423
YHR052W	-3.56341	8.1e-06	0.000196	7.0093
YBR088C	-2.66182	8.13e-06	0.000196	6.30267
YKL216W	-3.58889	8.17e-06	0.000196	9.24946
YBR171W	-1.79349	8.29e-06	0.000198	6.37271
YER126C	-3.22108	8.31e-06	0.000198	7.06833
YDR514C	-2.41281	8.36e-06	0.000198	5.33935
YLR340W	-3.6172	8.39e-06	0.000198	10.3288
YER118C	-1.81266	8.64e-06	0.000202	6.41196
YCR057C	-4.82959	8.84e-06	0.000204	7.37432
YAL003W	-2.98297	8.92e-06	0.000204	9.99268
YPL227C	-1.99398	9.02e-06	0.000205	6.17682
YLR008C	-1.88897	9.22e-06	0.000206	6.17315
YDR072C	-2.04545	9.26e-06	0.000206	6.77547
YGL123C-A	-3.63042	9.29e-06	0.000206	2.86425
YDL229W	-4.09511	9.31e-06	0.000206	10.53
YGL135W	-3.92415	9.49e-06	0.000208	9.82585
YCL036W	-7.10395	9.55e-06	0.000208	5.90625
YPL037C	-2.30064	9.56e-06	0.000208	8.72998
YPL032C	-2.00387	9.59e-06	0.000208	7.051
snR49	-3.51662	9.6e-06	0.000208	3.55318
YGL055W	-2.47968	9.93e-06	0.000213	8.56128
YGR283C	-3.60482	1.03e-05	0.000216	5.18557
YGR085C	-3.46824	1.04e-05	0.000216	9.01773
YNL096C	-3.07952	1.04e-05	0.000216	8.73481
YML043C	-3.15603	1.06e-05	0.000217	5.60545
YPL245W	-2.42889	1.06e-05	0.000217	5.1631
YNL061W	-3.80824	1.09e-05	0.000222	7.43457
YDR385W	-3.14348	1.11e-05	0.000224	9.84605
YHR066W	-3.50801	1.12e-05	0.000224	6.58716
YLR186W	-3.5068	1.13e-05	0.000224	6.48995
YBR172C	-2.49991	1.15e-05	0.000227	7.11752
YHR203C	-3.77956	1.15e-05	0.000227	9.75321
YGL009C	-2.82729	1.16e-05	0.000227	10.225
YHL001W	-2.79344	1.17e-05	0.000227	8.50419
YLR009W	-4.12266	1.2e-05	0.000231	7.36014
YBL039C	-5.86806	1.22e-05	0.000235	7.41382
YMR309C	-2.4941	1.23e-05	0.000236	8.10873
YML056C	-4.45203	1.24e-05	0.000237	8.64525
YBR084C-A	-3.66228	1.26e-05	0.000238	9.99412
YOL086C	-3.89971	1.26e-05	0.000238	12.4288
YHR215W	-1.84118	1.27e-05	0.000238	6.08337
YMR260C	-2.85031	1.29e-05	0.000241	8.24348
YLR333C	-3.555	1.3e-05	0.000241	8.47447
YBR181C	-3.86193	1.31e-05	0.000241	9.63007
YMR142C	-3.67512	1.35e-05	0.000245	10.1339
YCR012W	-3.62697	1.4e-05	0.00025	11.9598
YJR124C	-2.3911	1.42e-05	0.000251	5.90758
snR39	-3.42109	1.42e-05	0.000251	2.88187
YML113W	-2.96809	1.47e-05	0.000257	5.34649
YPL263C	-3.29051	1.49e-05	0.00026	6.63718
YCL031C	-1.79425	1.5e-05	0.000261	6.75582
YAL023C	-2.06909	1.51e-05	0.000261	8.48106
YDR091C	-2.9997	1.52e-05	0.000262	7.46337
YJR056C	-2.06202	1.53e-05	0.000262	4.83785
YDR429C	-2.31095	1.54e-05	0.000264	8.1416
YBL069W	-1.86151	1.55e-05	0.000264	4.94411
YNL062C	-4.43186	1.56e-05	0.000264	6.00231
YJR070C	-3.71341	1.59e-05	0.000265	7.69817
YFL034C-A	-2.3892	1.6e-05	0.000265	7.74728
YGR162W	-3.06219	1.6e-05	0.000265	8.49948
YJL191W	-3.02579	1.62e-05	0.000267	7.4337
YBL027W	-3.62816	1.63e-05	0.000267	10.435
YEL026W	-3.32422	1.64e-05	0.000267	7.91098
YGR090W	-3.1088	1.64e-05	0.000267	7.24607
YHR183W	-2.63779	1.64e-05	0.000267	10.1583
YBR084W	-4.5544	1.65e-05	0.000267	7.6788
YGR271C-A	-2.57891	1.68e-05	0.00027	5.72101
YLR073C	-4.69246	1.72e-05	0.000273	5.50544
YNL244C	-2.43649	1.74e-05	0.000276	8.39624
YBR187W	-2.14856	1.76e-05	0.000278	7.67833
YGR118W	-2.76664	1.78e-05	0.000279	9.90704
YJL148W	-4.0232	1.78e-05	0.000279	7.16305
YDL014W	-3.72104	1.79e-05	0.000279	8.80703
YML093W	-4.18609	1.79e-05	0.000279	7.41147
YGR021W	-1.80984	1.8e-05	0.000279	4.85333
YNR017W	-1.8348	1.81e-05	0.000279	7.45827
YNL151C	-3.58248	1.82e-05	0.000279	6.12813
YPL220W	-3.25708	1.82e-05	0.000279	9.1313
YDR190C	-1.94996	1.83e-05	0.000281	7.3625
YNL110C	-3.11372	1.85e-05	0.000282	6.92126
YGR211W	-3.13683	1.88e-05	0.000284	7.21974
YPR041W	-2.66603	1.88e-05	0.000284	8.04588
YLR441C	-3.40624	1.9e-05	0.000285	10.4245
YNL068C	-1.80195	1.91e-05	0.000285	6.08047
YDL164C	-1.76696	1.92e-05	0.000285	5.749
YIL103W	-3.9323	1.92e-05	0.000285	5.24642
YML053C	-1.71742	1.93e-05	0.000287	5.03585
YHR174W	-3.49877	1.95e-05	0.000287	12.9296
YNL175C	-3.79562	1.95e-05	0.000287	6.93176
YNL002C	-3.35154	1.98e-05	0.000287	7.4377
YDL228C	-4.37263	1.99e-05	0.000287	1.51954
YGR140W	-1.72714	1.99e-05	0.000287	5.56543
YCR087C-A	-4.10991	2e-05	0.000287	5.0756
YDR515W	-1.71154	2.02e-05	0.000289	4.75534
YOR361C	-2.25406	2.03e-05	0.00029	8.18658
YGR123C	-3.64081	2.06e-05	0.000293	6.12706
YAL038W	-3.14403	2.07e-05	0.000293	12.4239
YGL225W	-1.93778	2.08e-05	0.000293	8.20674
YJL124C	-1.81866	2.13e-05	0.000297	6.69659
YLR183C	-2.8926	2.19e-05	0.000302	5.59375
YBR154C	-2.29117	2.21e-05	0.000304	7.11856
YBR296C	-4.71451	2.21e-05	0.000304	6.69979
YOR355W	-1.93649	2.21e-05	0.000304	7.38822
YDR101C	-4.02931	2.24e-05	0.000307	7.17657
YGL226C-A	-1.49378	2.25e-05	0.000307	6.08683
YDR046C	-2.50127	2.27e-05	0.000307	8.01375
YEL003W	-1.68386	2.27e-05	0.000307	6.17932
YOR108W	-2.26444	2.28e-05	0.000308	7.99241
YPR124W	-1.56472	2.31e-05	0.000311	5.61199
YDR033W	-3.32764	2.38e-05	0.000316	9.31641
YBR247C	-4.2406	2.4e-05	0.000318	6.43867
YDR299W	-3.49449	2.41e-05	0.000318	6.65756
YBR030W	-1.8947	2.43e-05	0.00032	5.71033
YIL027C	-1.46749	2.43e-05	0.00032	5.66466
YPL075W	-1.68708	2.44e-05	0.00032	7.33172
YJR143C	-1.72352	2.46e-05	0.000322	8.07089
YMR079W	-1.73873	2.49e-05	0.000324	6.8968
YKL183W	-1.74968	2.5e-05	0.000324	5.52539
YNL248C	-4.64876	2.51e-05	0.000324	7.11014
YOL052C	-2.48894	2.53e-05	0.000325	6.13027
YGL078C	-4.92167	2.55e-05	0.000327	7.53283
YBL009W	-2.05734	2.58e-05	0.000329	5.35804
YLR287C	-2.06807	2.58e-05	0.000329	5.68007
YKR059W	-2.42031	2.61e-05	0.00033	8.67754
YBL031W	-2.16939	2.66e-05	0.000334	4.54086
YJR101W	-1.73433	2.67e-05	0.000336	5.58139
YDL208W	-3.0617	2.7e-05	0.000337	7.86753
YBR267W	-3.28802	2.71e-05	0.000338	6.57349
YML064C	-1.67598	2.71e-05	0.000338	4.87114
YHR128W	-2.53541	2.78e-05	0.000345	7.25946
YKL009W	-3.93189	2.79e-05	0.000345	7.57099
YOR276W	-1.5442	2.81e-05	0.000347	7.28948
YLL008W	-4.34315	2.83e-05	0.000348	7.33671
YDR050C	-2.81856	2.85e-05	0.000349	11.5952
YNR029C	-1.90408	2.85e-05	0.000349	5.48213
YHR142W	-1.59181	2.89e-05	0.000352	6.23387
YNL112W	-5.97444	2.89e-05	0.000352	8.81238
YLR074C	-3.49413	2.91e-05	0.000354	7.21767
YLR409C	-4.28772	2.93e-05	0.000355	7.05036
YNL252C	-1.62287	2.95e-05	0.000357	5.23199
YML022W	-2.38173	2.96e-05	0.000357	6.73414
YBR029C	-2.54963	3.02e-05	0.000363	6.77126
YLR401C	-4.74447	3.03e-05	0.000363	6.57539
YDR087C	-3.52227	3.04e-05	0.000363	6.11693
YLR075W	-3.04041	3.07e-05	0.000365	11.0608
YOR168W	-2.36526	3.07e-05	0.000365	8.05763
YOR206W	-3.19972	3.08e-05	0.000365	7.38125
YPL093W	-4.43336	3.08e-05	0.000365	8.32616
YHR193C	-1.94645	3.09e-05	0.000366	9.13779
YNL182C	-3.6241	3.1e-05	0.000366	6.2336
YMR043W	-1.56902	3.12e-05	0.000367	6.59293
YJR072C	-2.91966	3.14e-05	0.000368	6.50528
YPL081W	-4.60588	3.14e-05	0.000368	8.42242
YDR324C	-3.65914	3.16e-05	0.000368	7.13145
YMR049C	-4.10919	3.17e-05	0.000368	7.17547
YGR159C	-4.06375	3.21e-05	0.000371	9.57146
YOL077C	-3.85502	3.21e-05	0.000371	7.06164
YCL002C	-1.80678	3.24e-05	0.000372	5.48861
YDL150W	-2.74479	3.24e-05	0.000371	6.56751
YML060W	-1.7781	3.26e-05	0.000373	4.61075
YAL025C	-4.48878	3.3e-05	0.000375	7.44038
YBR192W	-1.55885	3.3e-05	0.000375	5.4645
YHR149C	-1.62318	3.3e-05	0.000375	6.00786
YDR060W	-3.61456	3.31e-05	0.000375	7.91393
YOL103W	-1.52457	3.35e-05	0.000377	7.13855
YIL131C	-2.45233	3.42e-05	0.000382	5.31116
YML082W	-2.49094	3.44e-05	0.000384	6.21328
YBR143C	-1.92632	3.46e-05	0.000384	8.71964
YDR184C	-4.46578	3.47e-05	0.000384	5.21261
YMR243C	-1.93775	3.47e-05	0.000384	8.03525
YCR072C	-3.49398	3.48e-05	0.000384	6.03092
YKL027W	-1.94092	3.51e-05	0.000386	6.09762
YMR146C	-2.07138	3.56e-05	0.00039	8.46779
YBR220C	-1.35469	3.57e-05	0.00039	6.01571
YDR083W	-3.82798	3.57e-05	0.00039	6.29763
YEL034W	-2.2812	3.6e-05	0.000392	9.81911
YKL082C	-2.60678	3.61e-05	0.000392	7.47334
YDR331W	-1.39139	3.67e-05	0.000397	6.03167
YFR001W	-2.223	3.68e-05	0.000397	6.31925
YHR072W-A	-2.48555	3.71e-05	0.000398	7.41226
YLR196W	-3.56781	3.74e-05	0.000401	7.55289
YLL024C	-2.38544	3.78e-05	0.000404	10.7755
YGL068W	-1.36432	3.81e-05	0.000405	6.49123
YHR107C	-1.44011	3.81e-05	0.000405	6.51234
YBL028C	-3.06381	3.82e-05	0.000405	6.40772
YAL059W	-3.77478	3.89e-05	0.000408	5.99932
YDR093W	-1.43965	3.91e-05	0.000409	6.98984
YKL143W	-4.35357	3.92e-05	0.000409	6.56108
YDR496C	-3.74883	3.93e-05	0.000409	7.30656
YBR079C	-2.16522	3.95e-05	0.00041	8.59985
YOL041C	-2.92982	3.99e-05	0.000413	7.29777
YFL022C	-2.15589	4.01e-05	0.000414	7.82466
YEL033W	-2.89766	4.05e-05	0.000416	4.24398
YGR260W	-1.61564	4.06e-05	0.000416	7.33528
YIL064W	-3.98523	4.07e-05	0.000416	5.03468
YDR045C	-2.0578	4.08e-05	0.000416	5.38702
YHR216W	-2.75734	4.09e-05	0.000417	8.58848
YLR175W	-3.23292	4.14e-05	0.000418	8.90234
YBR161W	-1.91185	4.16e-05	0.000418	4.84283
YDR156W	-1.56623	4.16e-05	0.000418	5.31061
YHR148W	-2.77446	4.16e-05	0.000418	5.60768
YLR063W	-3.18035	4.21e-05	0.000421	4.75143
YLR449W	-3.20194	4.23e-05	0.000421	6.9095
YNL016W	-1.55232	4.23e-05	0.000421	7.97684
YPL246C	-1.68269	4.27e-05	0.000422	6.81515
YDL205C	-1.85353	4.33e-05	0.000426	6.53069
YMR310C	-2.71416	4.33e-05	0.000426	5.73935
YDR234W	-2.21443	4.34e-05	0.000426	9.0724
YMR078C	-1.49483	4.38e-05	0.000427	5.44598
snR63	-3.8388	4.38e-05	0.000427	3.3013
YNL166C	-1.39822	4.44e-05	0.00043	6.2781
YPL142C	-4.34711	4.47e-05	0.000431	1.63946
YLR197W	-3.55941	4.54e-05	0.000437	8.81687
YDR417C	-3.01865	4.61e-05	0.000441	2.58302
YLR344W	-2.85097	4.65e-05	0.000442	9.08195
YBR068C	-2.12858	4.72e-05	0.000446	9.02099
YOR140W	-1.42442	4.76e-05	0.000448	6.23566
YPR133W-A	-1.34569	4.8e-05	0.00045	6.82987
YKL099C	-2.61075	4.81e-05	0.00045	5.90667
YKL113C	-1.51317	4.82e-05	0.00045	6.32166
YCL054W	-3.12639	4.83e-05	0.00045	7.56561
YER006W	-3.67875	4.88e-05	0.000453	7.38831
YJL134W	-1.53967	4.88e-05	0.000453	6.26874
YPL063W	-1.39738	4.88e-05	0.000453	7.45662
YDL049C	-1.52344	4.9e-05	0.000454	5.43435
YLL031C	-1.37184	4.91e-05	0.000454	6.68958
YOR073W	-2.85579	4.92e-05	0.000454	4.94094
YJL188C	-4.21299	4.93e-05	0.000455	2.74815
YML055W	-1.30835	4.97e-05	0.000456	5.73015
YDL033C	-1.62585	4.98e-05	0.000456	4.39391
YEL036C	-1.53729	4.98e-05	0.000456	7.46763
YDR449C	-3.4358	5.04e-05	0.00046	6.01314
YGR109C	-3.85014	5.08e-05	0.000463	3.37155
YBR087W	-1.43092	5.13e-05	0.000467	5.40025
YEL055C	-2.55856	5.18e-05	0.000468	7.04777
YMR093W	-2.67328	5.18e-05	0.000468	6.39771
YOR101W	-3.01625	5.23e-05	0.000472	6.88515
YEL022W	-1.3449	5.29e-05	0.000476	6.68346
YOR224C	-2.4391	5.3e-05	0.000476	7.17435
YGR169C-A	-2.27367	5.35e-05	0.000479	6.24253
YGL120C	-3.94523	5.43e-05	0.000484	7.39081
YFL001W	-2.57247	5.44e-05	0.000484	5.41287
YPL050C	-1.43515	5.47e-05	0.000486	7.67573
YLR222C	-3.72803	5.5e-05	0.000486	6.78126
YNL209W	-2.9082	5.5e-05	0.000486	10.229
YOR315W	-2.19955	5.5e-05	0.000486	7.35521
YKR081C	-3.71106	5.52e-05	0.000487	6.86891
YEL053W-A	-5.46687	5.65e-05	0.000496	1.75484
YJL200C	-2.65302	5.66e-05	0.000496	9.63785
YMR296C	-1.42896	5.68e-05	0.000496	7.51333
YJR067C	-1.68581	5.69e-05	0.000496	4.15099
YCR016W	-2.61341	5.76e-05	0.000499	6.18271
YPR010C	-4.03304	5.76e-05	0.000499	8.68013
YEL017C-A	-1.687	5.79e-05	0.0005	8.12081
YJL122W	-3.41937	5.79e-05	0.0005	6.59932
YNL075W	-2.64398	5.81e-05	0.0005	6.32618
YHR204W	-1.47118	5.84e-05	0.0005	6.35252
YPR137W	-2.20121	5.85e-05	0.000501	6.9629
YGL029W	-3.70272	5.93e-05	0.000503	6.11125
YDR384C	-2.4343	5.95e-05	0.000503	7.57786
YGR063C	-1.41867	5.95e-05	0.000503	5.61416
YMR076C	-1.29544	5.98e-05	0.000504	5.77242
YLR017W	-2.05896	5.99e-05	0.000504	6.42857
YCL058W-A	-3.30694	6e-05	0.000504	3.85656
snR86	-1.52463	6e-05	0.000504	5.69223
YLR129W	-3.62977	6.03e-05	0.000505	7.27197
YBR042C	-1.3538	6.15e-05	0.000509	5.69095
YNL246W	-1.72675	6.15e-05	0.000509	6.2677
YDR334W	-1.2548	6.27e-05	0.000515	6.80064
YKL166C	-1.56549	6.27e-05	0.000515	5.25352
YML065W	-1.50682	6.29e-05	0.000516	6.0331
YJL138C	-2.09884	6.3e-05	0.000516	9.00333
YLR455W	-1.42477	6.44e-05	0.000522	5.70608
YOR217W	-1.27327	6.45e-05	0.000523	6.62041
YHR103W	-1.31717	6.46e-05	0.000523	6.27229
YPR143W	-2.43906	6.5e-05	0.000523	6.58953
YML115C	-1.40487	6.54e-05	0.000523	6.67813
YOR232W	-1.35461	6.54e-05	0.000523	7.45179
YDR207C	-1.92374	6.59e-05	0.000526	5.2916
YDL148C	-4.31473	6.65e-05	0.000526	7.08003
YGR173W	-2.48972	6.71e-05	0.000528	6.00482
snR84	-3.15679	6.73e-05	0.000528	3.08999
YHR068W	-1.65389	6.74e-05	0.000528	7.63543
YNL181W	-1.56495	6.74e-05	0.000528	5.47936
YDL051W	-2.73569	6.8e-05	0.000529	7.32008
YGR103W	-4.3775	6.8e-05	0.000529	8.16698
YJR002W	-2.75498	6.8e-05	0.000529	7.2889
YKL068W-A	-2.66234	6.85e-05	0.000531	6.02294
YMR292W	-1.51839	6.85e-05	0.000531	5.62511
YMR070W	-1.46307	6.86e-05	0.000531	6.39123
YLR056W	-1.797	6.88e-05	0.000531	8.24003
YHR196W	-2.82652	6.94e-05	0.000536	7.10539
YOR078W	-2.1822	7e-05	0.000539	6.42875
YLL011W	-2.35911	7.01e-05	0.000539	6.3885
YNL065W	-1.88085	7.1e-05	0.000543	7.05028
YPL057C	-1.2443	7.17e-05	0.000547	6.75156
YGL188C-A	-3.00828	7.18e-05	0.000547	4.01604
YLR339C	-4.26975	7.18e-05	0.000547	0.877604
YGL162W	-1.68043	7.22e-05	0.000548	3.95397
YJR118C	-1.30151	7.25e-05	0.000549	6.14138
YER070W	-3.14761	7.26e-05	0.000549	8.52127
YOR359W	-2.69063	7.36e-05	0.000556	6.23361
YPL226W	-2.80726	7.4e-05	0.000557	8.91001
YHL017W	-1.43546	7.42e-05	0.000558	5.82073
YDR152W	-1.74659	7.44e-05	0.000558	6.68422
YHR005C-A	-1.3397	7.45e-05	0.000558	7.47546
YML080W	-1.57598	7.51e-05	0.000562	5.46886
YDR289C	-1.32011	7.53e-05	0.000563	5.3164
YGR280C	-3.14402	7.56e-05	0.000564	7.29242
YNL186W	-2.3683	7.62e-05	0.000567	7.47823
YER025W	-2.06919	7.68e-05	0.00057	8.14998
YDR245W	-1.41504	7.83e-05	0.000576	7.60551
YMR127C	-1.58443	7.85e-05	0.000576	4.63385
YPR065W	-1.82079	7.86e-05	0.000576	7.53584
YOL014W	-1.4655	7.89e-05	0.000577	4.73031
YER036C	-2.29345	8.04e-05	0.000586	8.98025
YJL115W	-1.50443	8.04e-05	0.000586	6.23303
YHR154W	-1.51177	8.06e-05	0.000586	5.5595
YOR372C	-1.81936	8.07e-05	0.000586	5.88528
YBR017C	-1.69186	8.09e-05	0.000586	7.03124
YGL171W	-3.42353	8.09e-05	0.000586	6.29871
YGL111W	-2.84266	8.15e-05	0.000589	6.64017
YER043C	-2.1626	8.21e-05	0.000591	9.84237
YOL020W	-1.49425	8.37e-05	0.000596	7.27298
YMR131C	-3.1272	8.39e-05	0.000596	7.96632
YIL019W	-3.25684	8.4e-05	0.000596	5.80578
YGR095C	-2.02316	8.43e-05	0.000596	5.73365
YJL080C	-1.6054	8.43e-05	0.000596	8.34741
YLR221C	-2.68765	8.43e-05	0.000596	6.64804
YDR359C	-1.58726	8.46e-05	0.000597	5.99517
YDR062W	-1.37325	8.49e-05	0.000597	7.85021
YDL095W	-1.45248	8.56e-05	0.000601	8.30908
YLR405W	-1.62061	8.65e-05	0.000606	5.5208
YOR006C	-2.03377	8.66e-05	0.000606	5.68257
YBL054W	-3.72621	8.88e-05	0.000616	6.20734
YPL094C	-1.37087	8.89e-05	0.000616	7.2174
YNL102W	-1.23574	8.9e-05	0.000616	6.18035
YBR238C	-1.91175	8.91e-05	0.000616	6.23267
YDR454C	-1.59957	8.94e-05	0.000618	7.53109
YPL211W	-4.00544	8.97e-05	0.000619	6.34012
YMR128W	-3.85119	9e-05	0.00062	6.84187
YIL127C	-3.80934	9.01e-05	0.00062	5.75577
YDR465C	-3.70356	9.07e-05	0.000622	6.78747
YOR188W	-1.70762	9.07e-05	0.000622	5.83444
snR128	-4.69893	9.1e-05	0.000622	0.73985
YBR034C	-2.14316	9.13e-05	0.000624	7.70314
YNL273W	-1.30543	9.15e-05	0.000624	5.10156
YNL132W	-3.98553	9.24e-05	0.000629	6.97089
YHR147C	-1.25527	9.27e-05	0.00063	5.22893
YMR179W	-1.37766	9.31e-05	0.000631	5.23988
YPR114W	-1.34526	9.41e-05	0.000636	6.70214
YPR044C	-3.48781	9.49e-05	0.000641	2.94163
YNL097C	-1.28918	9.5e-05	0.000641	5.04981
YDL043C	-1.49244	9.54e-05	0.000642	4.97932
YDL065C	-1.16991	9.56e-05	0.000642	6.08855
YBL052C	-1.20845	9.58e-05	0.000643	6.26952
YHR031C	-1.38898	9.64e-05	0.000644	5.47624
YKL001C	-2.35717	9.64e-05	0.000644	8.90553
YOR341W	-3.89275	9.64e-05	0.000644	8.25129
YDR180W	-1.51964	9.65e-05	0.000644	4.96363
YNL197C	-1.26947	9.68e-05	0.000645	6.67513
YGR285C	-1.95989	9.82e-05	0.000651	8.92532
YOR056C	-2.73047	9.83e-05	0.000651	6.74717
YKL156W	-2.1102	9.85e-05	0.000652	8.87563
YLR060W	-1.75527	9.99e-05	0.000659	8.49156
YHR169W	-3.62195	0.000101	0.000666	6.01142
YKL060C	-2.5541	0.000101	0.000663	13.0377
YDR302W	-1.16233	0.000102	0.000668	5.51343
YLR262C-A	-1.45599	0.000102	0.000667	7.39966
YGR033C	-1.2169	0.000103	0.000671	6.39923
YML109W	-1.18656	0.000103	0.000671	5.28824
YOR239W	-1.22084	0.000103	0.000671	7.49578
YDL232W	-1.17545	0.000104	0.000671	5.87769
YGR079W	-2.0964	0.000104	0.000671	6.23829
YGR083C	-1.69174	0.000104	0.000671	6.89424
YHR170W	-3.3093	0.000104	0.000671	7.44533
YIR021W	-1.24343	0.000104	0.000671	4.88784
YBR243C	-1.42058	0.000105	0.000671	6.18109
YDR073W	-1.15161	0.000105	0.000671	5.3873
YER122C	-1.40921	0.000105	0.000671	7.74108
YJR010W	-2.25044	0.000105	0.000671	8.71649
YKL078W	-4.36677	0.000105	0.000671	5.42962
YLR068W	-2.71609	0.000105	0.000671	5.54562
[truncated: 657 more rows]
